# Supplementary material for: Iodine pentoxide-mediated oxidative selenation and seleno/thiocyanation of electron-rich arenes
Source: Royal Society of Chemistry journal article supplement (doi:10.1039/d2ob00892k), 2022-01-01

*Supporting Information*

**Iodine Pentoxide-Mediated Oxidative Selenation and  
Seleno/Thiocyanation of Electron-Rich Arenes**

Yong-Hao Wang,<sup>†</sup> Yun-Qian Zhang,<sup>†</sup> Chen-Fan Zhou, You-Qin Jiang, Yue Xu, Xiaobao Zeng\*  
and Gong-Qing Liu\*

<sup>†</sup> Y.-H. Wang and Y.-Q. Zhang contributed equally.

*School of Pharmacy and Jiangsu Province Key Laboratory for Inflammation and Molecular Drug  
Target, Nantong University, 19 Qixiu Road, Nantong 226001, People's Republic of China*

E-mail: [zengxb@ntu.edu.cn](mailto:zengxb@ntu.edu.cn); [gqliu@ntu.edu.cn](mailto:gqliu@ntu.edu.cn)

**Content**

|                                                                        |     |
|------------------------------------------------------------------------|-----|
| 1. General information .....                                           | S2  |
| 2. Photograph of the color of reaction mixture .....                   | S2  |
| 3. General procedure for selenation of electron rich arenes .....      | S2  |
| 4. Characterization data .....                                         | S3  |
| 5. General procedure for selenocyanation of electron rich arenes ..... | S16 |
| 6. General procedure for thiocyanation of electron rich arenes .....   | S20 |
| 7. Gram-Scale Reaction for the Synthesis of 3an .....                  | S23 |
| 8. Control Experiments .....                                           | S23 |
| 9. References .....                                                    | S24 |
| 10. Copies of NMR spectra .....                                        | S25 |

## 1. General information

Reagents were used as received without further purification unless otherwise indicated. Solvents were dried and distilled prior to use. Petroleum ether used had a boiling point range of 60–90°C. Diselenides were prepared from the corresponding iodides with elemental selenium according to Braga's report.<sup>1</sup> Chromatographic purification of products was performed as flash column chromatography on silica gel (200–300 meshes). Thin-layer chromatography (TLC) was carried out on silica plates (TLC Silica GF<sub>254</sub>). Visualization of the compounds was accomplished by projecting UV-light onto the developed plates. Nuclear magnetic resonance spectra were recorded at ambient temperature (unless otherwise stated) at 400 MHz (100 MHz for <sup>13</sup>C) in CDCl<sub>3</sub> or DMSO-*d*<sub>6</sub>. Chemical shifts were reported in ppm (δ) using TMS as internal standard, and spin–spin coupling constants (*J*) were given in Hz. Multiplicities of NMR signals are abbreviated as follows: br = broad, s = singlet, d = doublet, t = triplet, q = quartet, m = multiplet. High resolution mass spectrometry (HRMS) analyses were carried out on a Thermo Fisher Q Exactive Mass Spectrometer. Melting points were determined on glass slides using a digital display microscopic melting point apparatus and were presented uncorrected.

## 2. Photograph of the color of reaction mixture

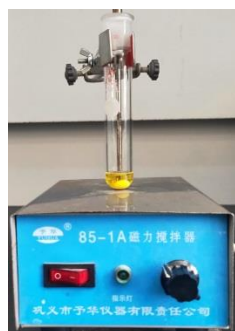

Fig. S1a at the beginning of the reaction

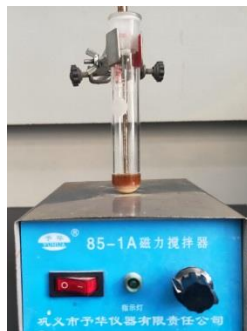

Fig. S1b at the end of the reaction

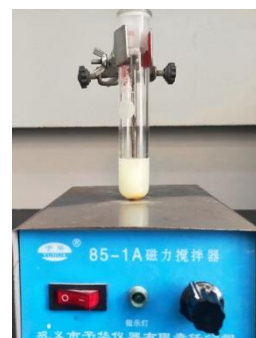

Fig. S1c after adding an aqueous Na<sub>2</sub>S<sub>2</sub>O<sub>3</sub>

## 3. General procedure for selenation of electron rich arenes

The reaction was carried out in an open air system at ambient temperature. To a 10 mL vessel with magnetic stir bar were added 0.5 mmol indole/arene, 0.5

mmol diselenide, 0.5 mmol I<sub>2</sub>O<sub>5</sub> and 2 mL of CH<sub>3</sub>CN. The reaction mixture was stirred for an indicated time. Then, the reaction was quenched with a saturated aqueous Na<sub>2</sub>S<sub>2</sub>O<sub>3</sub> solution and extracted with EtOAc. The combined organic layers were dried (Na<sub>2</sub>SO<sub>4</sub>) and concentrated to give a crude residue, which was purified by flash column chromatography.

#### 4. Characterization data

**3-(Phenylselanyl)-1H-indole (3aa).** Compound **3aa** was prepared according to the general procedure and isolated as a yellow solid (122 mg, 90% yield) after flash chromatography (petroleum ether/ethyl acetate = 20/1). mp=135-136 °C. <sup>1</sup>H NMR (400 MHz, CDCl<sub>3</sub>): δ 8.36 (brs, 1H), 7.56 (d, *J* = 7.9 Hz, 1H), 7.40 (d, *J* = 2.5 Hz, 1H), 7.36 (d, *J* = 8.1 Hz, 1H), 7.23 – 7.13 (m, 3H), 7.13 – 6.97 (m, 4H). <sup>13</sup>C{<sup>1</sup>H} NMR (100 MHz, CDCl<sub>3</sub>): δ 135.3, 132.8, 130.2, 128.9, 127.9, 127.6, 124.5, 121.9, 119.8, 119.3, 110.3, 97.1. The data are in accordance with the literature.<sup>2</sup>

**4-Methyl-3-(phenylselanyl)-1H-indole (3ab).** Compound **3ab** was prepared according to the general procedure and isolated as a brown solid (122 mg, 85% yield) after flash chromatography (petroleum ether/ethyl acetate = 25/1). mp=110-112 °C. <sup>1</sup>H NMR (400 MHz, CDCl<sub>3</sub>): δ 8.15 (brs, 1H), 7.30 (d, *J* = 2.6 Hz, 1H), 7.25 – 7.14 (m, 3H), 7.14 – 7.01 (m, 4H), 6.87 (d, *J* = 7.1 Hz, 1H), 2.68 (s, 3H). <sup>13</sup>C{<sup>1</sup>H} NMR (100 MHz, CDCl<sub>3</sub>): δ 136.9, 136.2, 132.6, 132.3, 129.2, 128.2, 127.3, 125.5, 123.1, 122.5, 109.5, 96.8, 19.0. The data are in accordance with the literature.<sup>2</sup>

**5-Methyl-3-(phenylselanyl)-1H-indole (3ac).** Compound **3ac** was prepared according to the general procedure and isolated as a brown solid (122 mg, 85% yield) after flash chromatography (petroleum ether/ethyl acetate = 20/1). mp=93-95 °C. <sup>1</sup>H NMR (400 MHz, CDCl<sub>3</sub>): δ 7.62 (d, *J* = 8.1 Hz, 1H), 7.37 (d, *J* = 8.3 Hz, 1H), 7.34 – 7.25 (m, 2H), 7.25 – 7.20 (m, 2H), 7.20 – 7.05 (m, 4H), 3.83 (s, 3H). <sup>13</sup>C{<sup>1</sup>H} NMR (100 MHz, CDCl<sub>3</sub>): δ 137.5, 135.7, 134.2, 130.7, 128.9, 128.6, 125.5, 122.5, 120.5, 120.4, 109.6, 96.0, 33.1. The data are in accordance with the literature.<sup>2</sup>

**6-Methyl-3-(phenylselanyl)-1H-indole (3ad).** Compound **3ad** was prepared according to the general procedure and isolated as a brown solid (113 mg, 79% yield)

after flash chromatography (petroleum ether/ethyl acetate = 20/1). mp=136-138 °C. <sup>1</sup>H NMR (400 MHz, CDCl<sub>3</sub>): δ 8.21 (brs, 1H), 7.49 (d, *J* = 8.1 Hz, 1H), 7.35 (d, *J* = 2.5 Hz, 1H), 7.26 – 7.17 (m, 3H), 7.17 – 7.04 (m, 3H), 6.99 (d, *J* = 8.2 Hz, 1H), 2.46 (s, 3H). <sup>13</sup>C{<sup>1</sup>H} NMR (100 MHz, CDCl<sub>3</sub>): δ 136.9, 134.0, 132.9, 130.7, 129.0, 128.6, 127.8, 125.6, 122.7, 120.0, 111.4, 97.9, 21.7. The data are in accordance with the literature.<sup>2</sup>

**7-Methyl-3-(phenylselanyl)-1*H*-indole (3ae).** Compound **3ae** was prepared according to the general procedure and isolated as a yellow solid (112 mg, 78% yield) after flash chromatography (petroleum ether/ethyl acetate = 25/1). mp=56-57 °C. <sup>1</sup>H NMR (400 MHz, CDCl<sub>3</sub>): δ 8.26 (brs, 1H), 7.48 (d, *J* = 7.5 Hz, 1H), 7.41 (d, *J* = 2.6 Hz, 1H), 7.29 – 7.19 (m, 2H), 7.15 – 6.96 (m, 5H), 2.49 (s, 3H). <sup>13</sup>C{<sup>1</sup>H} NMR (100 MHz, CDCl<sub>3</sub>): δ 136.0, 133.9, 131.0, 129.6, 129.0, 128.7, 125.6, 123.5, 121.1, 120.6, 118.1, 98.6, 16.5. The data are in accordance with the literature.<sup>2</sup>

**Methyl 3-(phenylselanyl)-1*H*-indole-4-carboxylate (3af).** Compound **3af** was prepared according to the general procedure and isolated as an oil (112 mg, 68% yield) after flash chromatography (petroleum ether/ethyl acetate = 2/1). <sup>1</sup>H NMR (400 MHz, CDCl<sub>3</sub>): δ 8.85 (brs, 1H), 7.60 – 7.45 (m, 2H), 7.33 – 7.25 (m, 2H), 7.27 – 7.20 (m, 2H), 7.18 – 7.09 (m, 3H), 3.72 (s, 3H). <sup>13</sup>C{<sup>1</sup>H} NMR (100 MHz, CDCl<sub>3</sub>): δ 169.4, 137.5, 134.1, 132.7, 130.1, 129.0, 126.1, 126.0, 125.1, 122.3, 121.9, 115.0, 98.3, 51.9. The data are in accordance with the literature.<sup>3</sup>

**Methyl 3-(phenylselanyl)-1*H*-indole-5-carboxylate (3ag).** Compound **3ag** was prepared according to the general procedure and isolated as white solid (124 mg, 75% yield) after flash chromatography (petroleum ether/ethyl acetate = 2/1). mp=155-157 °C. <sup>1</sup>H NMR (400 MHz, CDCl<sub>3</sub>): δ 8.73 (s, 1H), 8.41 (d, *J* = 1.7 Hz, 1H), 7.97 (dd, *J* = 8.6, 1.7 Hz, 1H), 7.55 (d, *J* = 2.5 Hz, 1H), 7.54 – 7.41 (m, 1H), 7.29 – 7.17 (m, 2H), 7.19 – 7.02 (m, 3H), 3.90 (s, 3H). <sup>13</sup>C{<sup>1</sup>H} NMR (100 MHz, CDCl<sub>3</sub>): δ 167.9, 139.0, 133.5, 132.7, 129.8, 129.1, 128.8, 125.8, 124.4, 123.2, 123.1, 111.3, 99.9, 52.0. The data are in accordance with the literature.<sup>2</sup>

**Methyl 3-(phenylselanyl)-1*H*-indole-6-carboxylate (3ah).** Compound **3ah** was prepared according to the general procedure and isolated as a white solid (134 mg, 81%



yield) after flash chromatography (petroleum ether/ethyl acetate = 2/1). mp=164-166 °C. <sup>1</sup>H NMR (400 MHz, CDCl<sub>3</sub>): δ 8.82 (brs, 1H), 8.22 (d, *J* = 1.4 Hz, 1H), 7.85 (dd, *J* = 8.4, 1.4 Hz, 1H), 7.73 – 7.52 (m, 2H), 7.39 – 7.18 (m, 2H), 7.17 – 6.96 (m, 3H), 3.94 (s, 3H). <sup>13</sup>C{<sup>1</sup>H} NMR (100 MHz, CDCl<sub>3</sub>): δ 168.0, 135.8, 134.3, 133.7, 133.3, 129.1, 128.8, 125.9, 124.8, 121.9, 120.1, 113.8, 98.8, 52.1. The data are in accordance with the literature.<sup>3</sup>

**5-Fluoro-3-(phenylselanyl)-1*H*-indole (3ai).** Compound **3ai** was prepared according to the general procedure and isolated as a pink solid (96 mg, 66% yield) after flash chromatography (petroleum ether/ethyl acetate = 15/1). mp=116-118 °C. <sup>1</sup>H NMR (400 MHz, CDCl<sub>3</sub>): δ 8.41 (brs, 1H), 7.50 (d, *J* = 2.5 Hz, 1H), 7.34 (dd, *J* = 8.8, 4.2 Hz, 1H), 7.27 (dd, *J* = 9.3, 2.5 Hz, 1H), 7.25 – 7.18 (m, 2H), 7.18 – 7.07 (m, 3H), 6.99 (td, *J* = 9.0, 2.6 Hz, 1H). <sup>13</sup>C{<sup>1</sup>H} NMR (100 MHz, CDCl<sub>3</sub>): δ 158.7 (d, *J* = 236.5 Hz), 133.4, 132.9, 132.8, 130.9 (d, *J* = 10.2 Hz), 129.1, 128.8, 125.8, 112.2 (d, *J* = 9.6 Hz), 111.5 (d, *J* = 26.7 Hz), 105.4 (d, *J* = 24.2 Hz), 98.3 (d, *J* = 4.8 Hz). <sup>19</sup>F NMR (376 MHz, CDCl<sub>3</sub>): δ -122.7. The data are in accordance with the literature.<sup>3</sup>

**5-Chloro-3-(phenylselanyl)-1*H*-indole (3aj).** Compound **3aj** was prepared according to the general procedure and isolated as a white solid (115 mg, 75% yield) after flash chromatography (petroleum ether/ethyl acetate = 15/1). mp=192-193 °C. <sup>1</sup>H NMR (400 MHz, CDCl<sub>3</sub>): δ 8.40 (brs, 1H), 7.60 (d, *J* = 2.1 Hz, 1H), 7.45 (d, *J* = 2.3 Hz, 1H), 7.31 (d, *J* = 8.6 Hz, 1H), 7.25 – 7.16 (m, 3H), 7.17 – 7.05 (m, 3H). <sup>13</sup>C{<sup>1</sup>H} NMR (100 MHz, CDCl<sub>3</sub>): δ 134.8, 133.4, 132.6, 131.3, 129.1, 128.7, 126.8, 125.9, 123.4, 119.9, 112.5, 98.0. The data are in accordance with the literature.<sup>3</sup>

**5-Bromo-3-(phenylselanyl)-1*H*-indole (3ak).** Compound **3ak** was prepared according to the general procedure and isolated as a white solid (128 mg, 73% yield) after flash chromatography (petroleum ether/ethyl acetate = 15/1). mp=97-99 °C. <sup>1</sup>H NMR (400 MHz, CDCl<sub>3</sub>): δ 8.45 (brs, 1H), 7.77 (d, *J* = 1.7 Hz, 1H), 7.46 (d, *J* = 2.5 Hz, 1H), 7.39 – 7.27 (m, 2H), 7.25 – 7.17 (m, 2H), 7.17 – 7.09 (m, 3H). <sup>13</sup>C{<sup>1</sup>H} NMR (100 MHz, CDCl<sub>3</sub>): δ 135.1, 133.4, 132.4, 131.9, 129.1, 128.7, 126.0, 125.9, 123.0, 114.4, 112.9, 97.9. The data are in accordance with the literature.<sup>3</sup>

**5-Iodo-3-(phenylselanyl)-1*H*-indole (3al).** Compound **3al** was prepared according to

the general procedure and isolated as a white solid (139 mg, 70% yield) after flash chromatography (petroleum ether/ethyl acetate = 15/1). mp=128-130 °C. <sup>1</sup>H NMR (400 MHz, CDCl<sub>3</sub>): δ 8.43 (brs, 1H), 7.98 (d, *J* = 1.5 Hz, 1H), 7.50 (dd, *J* = 8.5, 1.5 Hz, 1H), 7.41 (d, *J* = 2.5 Hz, 1H), 7.24 – 7.10 (m, 6H). <sup>13</sup>C{<sup>1</sup>H} NMR (100 MHz, CDCl<sub>3</sub>): δ 135.5, 133.4, 132.6, 132.1, 131.4, 129.2, 129.1, 128.7, 125.9, 113.4, 97.5, 84.7. The data are in accordance with the literature.<sup>4</sup>

**5-Methoxy-3-(phenylselanyl)-1*H*-indole (3am).** Compound **3am** was prepared according to the general procedure and isolated as an oil (137 mg, 91% yield) after flash chromatography (petroleum ether/ethyl acetate = 10/1). <sup>1</sup>H NMR (400 MHz, CDCl<sub>3</sub>): δ 8.37 (brs, 1H), 7.39 (d, *J* = 2.6 Hz, 1H), 7.28 (d, *J* = 8.8 Hz, 1H), 7.22 (dt, *J* = 6.0, 1.5 Hz, 2H), 7.17 – 7.02 (m, 4H), 6.90 (dd, *J* = 8.8, 2.5 Hz, 1H), 3.78 (s, 3H). <sup>13</sup>C{<sup>1</sup>H} NMR (100 MHz, CDCl<sub>3</sub>): δ 155.1, 134.0, 132.0, 131.3, 130.8, 129.0, 128.5, 125.6, 113.5, 112.3, 101.6, 97.6, 55.8. The data are in accordance with the literature.<sup>3</sup>

**3-(Phenylselanyl)-1*H*-indole-5-carbonitrile (3an).** Compound **3an** was prepared according to the general procedure and isolated as a white solid (74 mg, 50% yield) after flash chromatography (petroleum ether/ethyl acetate = 10/1). mp=151-152 °C. <sup>1</sup>H NMR (400 MHz, CDCl<sub>3</sub>): δ 8.86 (brs, 1H), 7.98 (d, *J* = 1.2 Hz, 1H), 7.62 (d, *J* = 2.5 Hz, 1H), 7.55 – 7.43 (m, 2H), 7.29 – 7.20 (m, 2H), 7.19 – 7.07 (m, 3H). <sup>13</sup>C{<sup>1</sup>H} NMR (100 MHz, CDCl<sub>3</sub>): δ 138.2, 133.2, 132.5, 130.0, 129.19, 129.16, 126.2, 126.1, 125.9, 120.3, 112.5, 104.1, 99.8. The data are in accordance with the literature.<sup>2</sup>

**3-(Phenylselanyl)-5-(4,4,5,5-tetramethyl-1,3,2-dioxaborolan-2-yl)-1*H*-indole (3ao).** Compound **3ao** was prepared according to the general procedure and isolated as a pink solid (139 mg, 70% yield) after flash chromatography (petroleum ether/ethyl acetate = 6/1). mp=166-168 °C. <sup>1</sup>H NMR (400 MHz, CDCl<sub>3</sub>): δ 8.57 (brs, 1H), 8.21 (d, *J* = 1.1 Hz, 1H), 7.71 (dd, *J* = 8.2, 1.1 Hz, 1H), 7.41 (d, *J* = 2.5 Hz, 1H), 7.38 (d, *J* = 8.2 Hz, 1H), 7.22 – 7.14 (m, 2H), 7.13 – 7.02 (m, 3H), 1.33 (s, 12H). <sup>13</sup>C{<sup>1</sup>H} NMR (100 MHz, CDCl<sub>3</sub>): δ 138.5, 134.3, 131.8, 129.8, 129.1, 129.0, 128.4, 127.9, 125.5, 110.9, 98.6, 83.6, 24.9. HRMS (ESI): *m/z* [M + H]<sup>+</sup> calcd for C<sub>20</sub>H<sub>23</sub>BNO<sub>2</sub>Se, 400.0982; found, 400.0986.

**3-(Phenylselanyl)-6-(trifluoromethyl)-1*H*-indole (3ap).** Compound **3ap** was

prepared according to the general procedure and isolated as a brown solid (116 mg, 68% yield) after flash chromatography (petroleum ether/ethyl acetate = 4/1). mp=110-111 °C. <sup>1</sup>H NMR (400 MHz, CDCl<sub>3</sub>): δ 8.61 (brs, 1H), 7.84 – 7.64 (m, 2H), 7.59 (d, *J* = 2.6 Hz, 1H), 7.39 (dd, *J* = 8.5, 1.4 Hz, 1H), 7.27 – 7.18 (m, 2H), 7.18 – 7.03 (m, 3H). <sup>13</sup>C{<sup>1</sup>H} NMR (100 MHz, CDCl<sub>3</sub>): δ 135.3, 133.6, 133.1, 132.4, 129.1, 128.9, 126.4, 126.0, 125.2 (q, *J*<sub>C-F</sub> = 31.9 Hz), 123.7, 120.9, 117.6 (d, *J*<sub>C-F</sub> = 3.5 Hz), 109.1 (q, *J*<sub>C-F</sub> = 4.5 Hz), 98.9. <sup>19</sup>F NMR (376 MHz, CDCl<sub>3</sub>): δ -60.6. HRMS (ESI): *m/z* [M + H]<sup>+</sup> calcd for C<sub>15</sub>H<sub>11</sub>F<sub>3</sub>NSe, 342.0003; found, 342.0014.

**3-(Phenylselanyl)-1*H*-indole-7-carbaldehyde (3aq).** Compound **3aq** was prepared according to the general procedure and isolated as a white solid (84 mg, 56% yield) after flash chromatography (petroleum ether/ethyl acetate = 8/1). mp=110-112 °C. <sup>1</sup>H NMR (400 MHz, CDCl<sub>3</sub>): δ 10.39 (brs, 1H), 10.13 (s, 1H), 7.91 (d, *J* = 7.8 Hz, 1H), 7.70 (dd, *J* = 7.3, 1.0 Hz, 1H), 7.60 (d, *J* = 2.4 Hz, 1H), 7.29 (t, *J* = 7.6 Hz, 1H), 7.25 – 7.18 (m, 2H), 7.16 – 7.03 (m, 3H). <sup>13</sup>C{<sup>1</sup>H} NMR (100 MHz, CDCl<sub>3</sub>): δ 193.4, 134.4, 133.3, 132.9, 131.2, 129.6, 129.1, 128.9, 127.8, 125.9, 120.9, 120.5, 98.8. HRMS (ESI): *m/z* [M + H]<sup>+</sup> calcd for C<sub>15</sub>H<sub>12</sub>N<sub>2</sub>OSe, 302.0079; found, 302.0086.

**1-Methyl-3-(phenylselanyl)-1*H*-indole (3ar).** Compound **3ar** was prepared according to the general procedure and isolated as a brown solid (123 mg, 86% yield) after flash chromatography (petroleum ether/ethyl acetate = 30/1). mp=85-87 °C. <sup>1</sup>H NMR (400 MHz, CDCl<sub>3</sub>): δ 7.62 (d, *J* = 8.5 Hz, 1H), 7.37 (d, *J* = 8.3 Hz, 1H), 7.35 – 7.26 (m, 2H), 7.25 – 7.20 (m, 2H), 7.20 – 7.04 (m, 4H), 3.83 (s, 3H). <sup>13</sup>C{<sup>1</sup>H} NMR (100 MHz, CDCl<sub>3</sub>): δ 137.5, 135.7, 134.2, 130.7, 128.9, 128.6, 125.5, 122.5, 120.5, 120.4, 109.6, 96.0, 33.1. The data are in accordance with the literature.<sup>2</sup>

**1-Benzyl-3-(phenylselanyl)-1*H*-indole (3as).** Compound **3as** was prepared according to the general procedure and isolated as a white solid (147 mg, 81% yield) after flash chromatography (petroleum ether/ethyl acetate = 80/1). mp=75-77 °C. <sup>1</sup>H NMR (400 MHz, CDCl<sub>3</sub>): δ 7.64 (d, *J* = 7.8 Hz, 1H), 7.40 (s, 1H), 7.36 – 7.27 (m, 4H), 7.27 – 7.19 (m, 3H), 7.20 – 7.04 (m, 6H), 5.36 (s, 2H). <sup>13</sup>C{<sup>1</sup>H} NMR (100 MHz, CDCl<sub>3</sub>): δ 137.1, 136.7, 135.0, 134.1, 130.9, 129.0, 128.9, 128.5, 127.9, 127.0, 125.5, 122.7, 120.7, 120.6, 110.1, 96.8, 50.4. The data are in accordance with the literature.<sup>2</sup>

**2-Methyl-3-(phenylselanyl)-1H-indole (3at).** Compound **3at** was prepared according to the general procedure and isolated as a pink solid (122 mg, 85% yield) after flash chromatography (petroleum ether/ethyl acetate = 15/1). mp=90-91 °C. <sup>1</sup>H NMR (400 MHz, CDCl<sub>3</sub>): δ 8.26 (brs, 1H), 7.55 (d, *J* = 7.7 Hz, 1H), 7.33 (d, *J* = 7.7 Hz, 1H), 7.23 – 6.97 (m, 7H), 2.55 (s, 3H). <sup>13</sup>C{<sup>1</sup>H} NMR (100 MHz, CDCl<sub>3</sub>): δ 140.8, 135.8, 133.9, 131.2, 128.9, 128.3, 125.4, 122.1, 120.6, 119.8, 110.5, 96.3, 13.2. The data are in accordance with the literature.<sup>2</sup>

**2-Phenyl-3-(phenylselanyl)-1H-indole (3au).** Compound **3au** was prepared according to the general procedure and isolated as an oil (134 mg, 77% yield) after flash chromatography (petroleum ether/ethyl acetate = 10/1). <sup>1</sup>H NMR (400 MHz, CDCl<sub>3</sub>): δ 8.54 (s, 1H), 7.70 (d, *J* = 6.8 Hz, 2H), 7.65 (d, *J* = 7.9 Hz, 1H), 7.56 – 7.33 (m, 4H), 7.32 – 7.02 (m, 7H). <sup>13</sup>C{<sup>1</sup>H} NMR (100 MHz, CDCl<sub>3</sub>): δ 142.1, 136.2, 134.1, 132.1, 132.0, 129.1, 128.7, 128.6, 128.3, 125.5, 123.3, 121.1, 120.9, 111.1, 95.8. The data are in accordance with the literature.<sup>2</sup>

**3-Methyl-2-(phenylselanyl)-1H-indole (3av).** Compound **3av** was prepared according to the general procedure and isolated as an oil (76 mg, 53% yield) after flash chromatography (petroleum ether/ethyl acetate = 20/1). <sup>1</sup>H NMR (400 MHz, CDCl<sub>3</sub>): δ 7.95 (brs, 1H), 7.53 (d, *J* = 7.9 Hz, 1H), 7.22 (d, *J* = 7.9 Hz, 1H), 7.18 – 7.01 (m, 7H), 2.34 (s, 3H). <sup>13</sup>C{<sup>1</sup>H} NMR (100 MHz, CDCl<sub>3</sub>): δ 136.5, 131.0, 128.3, 128.2, 127.2, 125.3, 122.1, 118.9, 118.5, 118.2, 117.0, 109.7, 9.4. The data are in accordance with the literature.<sup>5</sup>

**2-Methyl-3-(*p*-tolylselanyl)-1H-indole (3ba).** Compound **3ba** was prepared according to the general procedure and isolated as an oil (111 mg, 74% yield) after flash chromatography (petroleum ether/ethyl acetate = 20/1). <sup>1</sup>H NMR (400 MHz, CDCl<sub>3</sub>): δ 8.18 (brs, 1H), 7.72 – 7.47 (m, 1H), 7.30 (d, *J* = 8.0 Hz, 1H), 7.20 – 7.02 (m, 4H), 6.93 (d, *J* = 7.9 Hz, 2H), 2.52 (s, 3H), 2.22 (s, 3H). <sup>13</sup>C{<sup>1</sup>H} NMR (100 MHz, CDCl<sub>3</sub>): 140.7, 135.8, 135.2, 131.3, 130.0, 129.8, 128.6, 122.1, 120.6, 119.8, 110.5, 96.6, 20.9, 13.2. HRMS (ESI): *m/z* [M + H]<sup>+</sup> calcd for C<sub>16</sub>H<sub>16</sub>NSe, 302.0442; found, 302.0437.

**3-((4-Methoxyphenyl)selanyl)-2-methyl-1H-indole (3bb).** Compound **3bb** was

prepared according to the general procedure and isolated as an oil (123 mg, 78% yield) after flash chromatography (petroleum ether/ethyl acetate = 10/1).  $^1\text{H}$  NMR (400 MHz,  $\text{CDCl}_3$ ):  $\delta$  8.21 (brs, 1H), 7.57 (d,  $J = 7.6$  Hz, 1H), 7.29 (d,  $J = 7.6$  Hz, 2H), 7.22 – 7.02 (m, 4H), 6.69 (d,  $J = 8.7$  Hz, 2H), 3.70 (s, 3H), 2.54 (s, 3H).  $^{13}\text{C}\{^1\text{H}\}$  NMR (100 MHz,  $\text{CDCl}_3$ ): 158.1, 140.4, 135.7, 131.2, 130.7, 123.7, 122.0, 120.5, 119.8, 114.8, 110.4, 97.4, 55.3, 13.2. The data are in accordance with the literature.<sup>5</sup>

**2-Methyl-3-((4-(trifluoromethoxy)phenyl)selanyl)-1H-indole (3bc).** Compound **3bc** was prepared according to the general procedure and isolated as an oil (152 mg, 82% yield) after flash chromatography (petroleum ether/ethyl acetate = 10/1).  $^1\text{H}$  NMR (400 MHz,  $\text{CDCl}_3$ ):  $\delta$  8.27 (brs, 1H), 7.53 (d,  $J = 7.8$  Hz, 1H), 7.34 (d,  $J = 8.0$  Hz, 1H), 7.27 – 7.07 (m, 4H), 7.00 – 6.92 (m, 2H), 2.54 (s, 3H).  $^{13}\text{C}\{^1\text{H}\}$  NMR (100 MHz,  $\text{CDCl}_3$ ):  $\delta$  147.3 (d,  $J_{\text{C-F}} = 2.1$  Hz), 141.0, 135.8, 132.45, 131.0, 129.4, 122.3, 121.7, 120.8, 119.6, 117.9 (q,  $J_{\text{C-F}} = 256.9$  Hz), 110.6, 96.0, 13.2.  $^{19}\text{F}$  NMR (376 MHz,  $\text{CDCl}_3$ ):  $\delta$  -58.0. HRMS (ESI):  $m/z$   $[\text{M} + \text{H}]^+$  calcd for  $\text{C}_{16}\text{H}_{13}\text{F}_3\text{NOSe}$ , 372.0109; found, 372.0126.

**3-([1,1'-Biphenyl]-4-ylselanyl)-2-methyl-1H-indole (3bd).** Compound **3bd** was prepared according to the general procedure and isolated as a brown solid (154 mg, 85% yield) after flash chromatography (petroleum ether/ethyl acetate = 15/1). mp=150-151  $^\circ\text{C}$ .  $^1\text{H}$  NMR (400 MHz,  $\text{CDCl}_3$ ):  $\delta$  8.30 (brs, 1H), 7.58 (d,  $J = 18.0$  Hz, 1H), 7.49 (d,  $J = 8.0$  Hz, 2H), 7.42 – 7.26 (m, 6H), 7.23 – 7.11 (m, 4H), 2.58 (s, 3H).  $^{13}\text{C}\{^1\text{H}\}$  NMR (100 MHz,  $\text{CDCl}_3$ ):  $\delta$  140.9, 140.7, 138.4, 135.8, 133.2, 131.2, 128.7, 128.6, 127.7, 127.1, 126.8, 122.2, 120.7, 119.8, 110.5, 96.1, 13.3. HRMS (ESI):  $m/z$   $[\text{M} + \text{H}]^+$  calcd for  $\text{C}_{21}\text{H}_{18}\text{NSe}$ , 364.0599; found, 364.0610.

**3-((4-Fluorophenyl)selanyl)-2-methyl-1H-indole (3be).** Compound **3be** was prepared according to the general procedure and isolated as a brown solid (122 mg, 80% yield) after flash chromatography (petroleum ether/ethyl acetate = 15/1). mp=74-76  $^\circ\text{C}$ .  $^1\text{H}$  NMR (400 MHz,  $\text{CDCl}_3$ ):  $\delta$  8.17 (brs, 1H), 7.54 (d,  $J = 7.7$  Hz, 1H), 7.29 (d,  $J = 7.4$  Hz, 1H), 7.24 – 7.06 (m, 4H), 6.91 – 6.58 (m, 2H), 2.51 (s, 3H).  $^{13}\text{C}\{^1\text{H}\}$  NMR (100 MHz,  $\text{CDCl}_3$ ):  $\delta$  161.4 (d,  $J_{\text{C-F}} = 244.1$  Hz), 140.8, 135.8, 131.1, 130.3 (d,  $J_{\text{C-F}} = 7.6$  Hz), 128.2 (d,  $J_{\text{C-F}} = 3.3$  Hz), 122.2, 120.8, 119.7, 116.1 (d,  $J_{\text{C-F}} = 21.6$  Hz), 110.6,

96.7, 13.2.  $^{19}\text{F}$  NMR (376 MHz,  $\text{CDCl}_3$ ):  $\delta$  -117.6. HRMS (ESI):  $m/z$   $[\text{M} + \text{H}]^+$  calcd for  $\text{C}_{15}\text{H}_{13}\text{FNSe}$ , 306.0192; found, 306.0169.

**3-((4-Chlorophenyl)selanyl)-2-methyl-1H-indole (3bf)**. Compound **3bf** was prepared according to the general procedure and isolated as a brown solid (138 mg, 86% yield) after flash chromatography (petroleum ether/ethyl acetate = 15/1). mp=81-83  $^{\circ}\text{C}$ .  $^1\text{H}$  NMR (400 MHz,  $\text{CDCl}_3$ ):  $\delta$  8.28 (brs, 1H), 7.51 (d,  $J = 7.7$  Hz, 1H), 7.33 (d,  $J = 8.1$  Hz, 1H), 7.19 (dd,  $J = 8.1, 7.1$  Hz, 1H), 7.13 (dd,  $J = 8.1, 7.1$  Hz, 1H), 7.07 (s, 4H), 2.53 (s, 3H).  $^{13}\text{C}\{^1\text{H}\}$  NMR (100 MHz,  $\text{CDCl}_3$ ):  $\delta$  140.9, 135.8, 132.2, 131.3, 131.0, 129.6, 129.0, 122.3, 120.8, 119.6, 110.6, 96.0, 13.2. The data are in accordance with the literature.<sup>5</sup>

**3-(Mesitylselanyl)-2-methyl-1H-indole (3bg)**. Compound **3bg** was prepared according to the general procedure and isolated as a brown solid (123 mg, 75% yield) after flash chromatography (petroleum ether/ethyl acetate = 5/1). mp=88-89  $^{\circ}\text{C}$ .  $^1\text{H}$  NMR (400 MHz,  $\text{CDCl}_3$ ):  $\delta$  7.90 (brs, 1H), 7.36 (d,  $J = 7.8$  Hz, 1H), 7.19 (d,  $J = 7.8$  Hz, 1H), 7.08 (ddd,  $J = 8.0, 7.1, 1.4$  Hz, 1H), 7.02 (dd,  $J = 8.2, 7.1, 1.2$  Hz, 1H), 6.82 (s, 2H), 2.44 (s, 6H), 2.37 (s, 3H), 2.20 (s, 3H).  $^{13}\text{C}\{^1\text{H}\}$  NMR (100 MHz,  $\text{CDCl}_3$ ): 141.9, 137.9, 137.2, 135.6, 131.0, 128.7, 128.6, 121.5, 120.1, 119.6, 110.3, 98.1, 24.3, 20.9, 13.2. HRMS (ESI):  $m/z$   $[\text{M} + \text{H}]^+$  calcd for  $\text{C}_{18}\text{H}_{20}\text{NSe}$ , 330.0755; found, 330.0779.

**3-(Benzo[d][1,3]dioxol-5-ylselanyl)-2-methyl-1H-indole (3bh)**. Compound **3bh** was prepared according to the general procedure and isolated as a yellow solid (134 mg, 81% yield) after flash chromatography (petroleum ether/ethyl acetate = 8/1). mp=86-88  $^{\circ}\text{C}$ .  $^1\text{H}$  NMR (400 MHz,  $\text{CDCl}_3$ ):  $\delta$  8.22 (brs, 1H), 7.57 (d,  $J = 8.0$  Hz, 1H), 7.31 (d,  $J = 8.0$  Hz, 1H), 7.21 – 7.13 (m, 2H), 6.77 (dd,  $J = 8.0, 1.7$  Hz, 1H), 6.66 (d,  $J = 1.7$  Hz, 1H), 6.62 (d,  $J = 8.0$  Hz, 1H), 5.84 (s, 2H), 2.56 (s, 3H).  $^{13}\text{C}\{^1\text{H}\}$  NMR (100 MHz,  $\text{CDCl}_3$ ):  $\delta$  148.1, 146.2, 140.5, 135.7, 131.1, 125.2, 122.3, 122.1, 120.7, 119.7, 110.5, 110.1, 108.9, 100.9, 97.3, 13.2. HRMS (ESI):  $m/z$   $[\text{M} + \text{H}]^+$  calcd for  $\text{C}_{16}\text{H}_{14}\text{NO}_2\text{Se}$ , 332.0184; found, 332.0186.

**2-Methyl-3-(methylnselanyl)-1H-indole (3bi)**. Compound **3bi** was prepared according to the general procedure and isolated as an oil (86 mg, 77% yield) after

flash chromatography (petroleum ether/ethyl acetate = 8/1).  $^1\text{H}$  NMR (400 MHz,  $\text{CDCl}_3$ ):  $\delta$  7.98 (brs, 1H), 7.73 – 7.54 (m, 1H), 7.38 – 7.21 (m, 1H), 7.17 – 7.14 (m, 2H), 2.52 (s, 3H), 2.07 (s, 3H).  $^{13}\text{C}\{^1\text{H}\}$  NMR (100 MHz,  $\text{CDCl}_3$ ):  $\delta$  139.0, 135.6, 131.0, 121.8, 120.2, 119.6, 110.5, 98.1, 13.1, 8.6. HRMS (ESI):  $m/z$   $[\text{M} + \text{H}]^+$  calcd for  $\text{C}_{10}\text{H}_{12}\text{NSe}$ , 226.0129; found, 226.0139.

**3-(Ethylselanyl)-2-methyl-1H-indole (3bj)**. Compound **3bj** was prepared according to the general procedure and isolated as an oil (83 mg, 70% yield) after flash chromatography (petroleum ether/ethyl acetate = 15/1).  $^1\text{H}$  NMR (400 MHz,  $\text{CDCl}_3$ ):  $\delta$  8.04 (brs, 1H), 7.72 – 7.55 (m, 1H), 7.37 – 7.21 (m, 1H), 7.18 – 7.07 (m, 2H), 2.61 (q,  $J = 7.5$  Hz, 2H), 2.52 (s, 3H), 1.27 (t,  $J = 7.5$  Hz, 3H).  $^{13}\text{C}\{^1\text{H}\}$  NMR (100 MHz,  $\text{CDCl}_3$ ):  $\delta$  139.9, 135.7, 131.7, 121.8, 120.2, 119.7, 110.4, 96.7, 21.8, 16.1, 13.3. HRMS (ESI):  $m/z$   $[\text{M} + \text{H}]^+$  calcd for  $\text{C}_{11}\text{H}_{14}\text{NSe}$ , 240.0286; found, 240.0259.

**3-(Benzylselanyl)-2-methyl-1H-indole (3bk)**. Compound **3bk** was prepared according to the general procedure and isolated as an oil (138 mg, 92% yield) after flash chromatography (petroleum ether/ethyl acetate = 8/1).  $^1\text{H}$  NMR (400 MHz,  $\text{CDCl}_3$ ):  $\delta$  7.89 (brs, 1H), 7.67 – 7.56 (m, 1H), 7.26 – 7.17 (m, 1H), 7.17 – 7.13 (m, 2H), 7.11 – 7.08 (m, 3H), 6.96 – 6.87 (m, 2H), 3.73 (s, 2H), 1.98 (s, 3H).  $^{13}\text{C}\{^1\text{H}\}$  NMR (100 MHz,  $\text{CDCl}_3$ ):  $\delta$  141.2, 140.0, 135.7, 131.4, 128.8, 128.1, 126.3, 121.8, 120.3, 119.6, 110.5, 96.7, 31.5, 12.5, 13.2. The data are in accordance with the literature.<sup>6</sup>

**2-Methyl-3-(phenethylselanyl)-1H-indole (3bl)**. Compound **3bl** was prepared according to the general procedure and isolated as a brown solid (138 mg, 88% yield) after flash chromatography (petroleum ether/ethyl acetate = 5/1). mp=61-63 °C.  $^1\text{H}$  NMR (400 MHz,  $\text{CDCl}_3$ ):  $\delta$  7.95 (brs, 1H), 7.64 (dd,  $J = 5.9, 3.2$  Hz, 1H), 7.26 – 7.18 (m, 3H), 7.16 – 7.10 (m, 3H), 7.09 – 7.04 (m, 2H), 3.06 – 2.75 (m, 4H), 2.47 (s, 3H).  $^{13}\text{C}\{^1\text{H}\}$  NMR (100 MHz,  $\text{CDCl}_3$ ):  $\delta$  141.5, 139.9, 135.7, 131.6, 128.45, 128.41, 126.2, 121.9, 120.4, 119.7, 110.5, 96.8, 37.3, 28.9, 13.3. HRMS (ESI):  $m/z$   $[\text{M} + \text{H}]^+$  calcd for  $\text{C}_{17}\text{H}_{18}\text{NSe}$ , 316.0599; found, 316.0583.

**2-Methyl-3-(pentylselanyl)-1H-indole (3bm)**. Compound **3bm** was prepared according to the general procedure and isolated as an oil (94 mg, 67% yield) after

flash chromatography (petroleum ether/ethyl acetate = 10/1).  $^1\text{H}$  NMR (400 MHz,  $\text{CDCl}_3$ ):  $\delta$  8.01 (brs, 1H), 7.65 – 7.62 (m, 1H), 7.26 – 7.23 (m, 1H), 7.20 – 7.06 (m, 2H), 2.60 (t,  $J = 7.4$  Hz, 2H), 2.52 (s, 3H), 1.64 – 1.46 (m, 2H), 1.40 – 1.16 (m, 4H), 0.84 (t,  $J = 7.2$  Hz, 3H).  $^{13}\text{C}\{^1\text{H}\}$  NMR (100 MHz,  $\text{CDCl}_3$ ):  $\delta$  139.7, 135.7, 131.6, 121.7, 120.2, 119.7, 110.4, 97.1, 31.9, 30.3, 28.5, 22.3, 14.0, 13.3. HRMS (ESI):  $m/z$   $[\text{M} + \text{H}]^+$  calcd for  $\text{C}_{14}\text{H}_{20}\text{NSe}$ , 282.0755; found, 282.0744.

**3-(Heptylselanyl)-2-methyl-1H-indole (3bn)**. Compound **3bn** was prepared according to the general procedure and isolated as an oil (102 mg, 66% yield) after flash chromatography (petroleum ether/ethyl acetate = 10/1).  $^1\text{H}$  NMR (400 MHz,  $\text{CDCl}_3$ ):  $\delta$  8.05 (s, 1H), 7.78 – 7.54 (m, 1H), 7.43 – 7.21 (m, 1H), 7.21 – 7.08 (m, 2H), 2.61 (t,  $J = 7.4$  Hz, 2H), 2.54 (s, 3H), 1.55 (p,  $J = 7.3$  Hz, 2H), 1.35 – 1.30 (m, 2H), 1.29 – 1.16 (m, 6H), 0.85 (t,  $J = 6.8$  Hz, 3H).  $^{13}\text{C}\{^1\text{H}\}$  NMR (100 MHz,  $\text{CDCl}_3$ ):  $\delta$  139.6, 135.6, 131.6, 121.7, 120.2, 119.7, 110.3, 97.1, 31.8, 30.6, 29.7, 28.9, 28.5, 22.6, 14.1, 13.3. HRMS (ESI):  $m/z$   $[\text{M} + \text{H}]^+$  calcd for  $\text{C}_{16}\text{H}_{24}\text{NSe}$ , 310.1068; found, 310.1075.

**3-(Isobutylselanyl)-2-methyl-1H-indole (3bo)**. Compound **3bo** was prepared according to the general procedure and isolated as an oil (99 mg, 74% yield) after flash chromatography (petroleum ether/ethyl acetate = 8/1).  $^1\text{H}$  NMR (400 MHz,  $\text{CDCl}_3$ ):  $\delta$  7.99 (brs, 1H), 7.71 – 7.58 (m, 1H), 7.31 – 7.21 (m, 1H), 7.20 – 7.10 (m, 2H), 2.83 – 2.35 (m, 5H), 1.69 (dt,  $J = 13.4, 6.7$  Hz, 1H), 0.98 (d,  $J = 6.6$  Hz, 6H).  $^{13}\text{C}\{^1\text{H}\}$  NMR (100 MHz,  $\text{CDCl}_3$ ):  $\delta$  139.4, 135.7, 131.6, 121.7, 120.2, 119.7, 110.4, 97.5, 38.4, 29.0, 22.5, 13.3. HRMS (ESI):  $m/z$   $[\text{M} + \text{H}]^+$  calcd for  $\text{C}_{13}\text{H}_{18}\text{NSe}$ , 268.0599; found, 268.0573.

**3-(Cyclohexylselanyl)-2-methyl-1H-indole (3bp)**. Compound **3bp** was prepared according to the general procedure and isolated as an oil (99 mg, 68% yield) after flash chromatography (petroleum ether/ethyl acetate = 10/1).  $^1\text{H}$  NMR (400 MHz,  $\text{CDCl}_3$ ):  $\delta$  8.09 (brs, 1H), 7.70 – 7.53 (m, 1H), 7.35 – 7.20 (m, 1H), 7.23 – 7.01 (m, 2H), 3.05 – 2.92 (m, 1H), 2.54 (s, 3H), 2.13 – 1.78 (m, 2H), 1.69 – 1.66 (m, 2H), 1.56 – 1.34 (m, 3H), 1.29 – 1.03 (m, 3H).  $^{13}\text{C}\{^1\text{H}\}$  NMR (100 MHz,  $\text{CDCl}_3$ ):  $\delta$  140.3, 135.6, 132.3, 121.7, 120.2, 120.1, 110.3, 96.5, 43.0, 34.5, 27.0, 25.7, 13.4. HRMS



(ESI):  $m/z$   $[M + H]^+$  calcd for  $C_{15}H_{20}NSe$ , 294.0755; found, 294.0751.

**Methyl 2-methyl-2-((2-methyl-1H-indol-3-yl)selanyl)propanoate (3bq).**

Compound **3bq** was prepared according to the general procedure and isolated as a yellow solid (109 mg, 70% yield) after flash chromatography (petroleum ether/ethyl acetate = 10/1). mp=98-100 °C.  $^1H$  NMR (400 MHz,  $CDCl_3$ ):  $\delta$  8.42 (brs, 1H), 7.70 – 7.44 (m, 1H), 7.23 – 7.18 (m, 1H), 7.16 – 7.05 (m, 2H), 3.56 (s, 3H), 2.48 (d,  $J = 0.8$  Hz, 3H), 1.57 (s, 6H).  $^{13}C\{^1H\}$  NMR (100 MHz,  $CDCl_3$ ):  $\delta$  175.8, 142.2, 135.5, 132.1, 121.9, 120.4, 119.9, 110.5, 97.3, 52.3, 45.7, 26.2, 13.2. HRMS (ESI):  $m/z$   $[M + H]^+$  calcd for  $C_{14}H_{18}NO_2Se$ , 312.0497; found, 312.0490.

**Ethyl (R)-2-((2-methyl-1H-indol-3-yl)selanyl)propanoate (3br).**

Compound **3br** was prepared according to the general procedure and isolated as a yellow solid (116 mg, 75% yield) after flash chromatography (petroleum ether/ethyl acetate = 5/1). mp=65-67 °C.  $^1H$  NMR (400 MHz,  $CDCl_3$ ):  $\delta$  8.35 (s, 1H), 7.60 – 7.39 (m, 1H), 7.16 – 7.10 (m, 1H), 7.08 – 7.00 (m, 2H), 4.09 – 3.75 (m, 2H), 3.48 (q,  $J = 7.1$  Hz, 1H), 2.39 (s, 3H), 1.39 (d,  $J = 7.1$  Hz, 3H), 1.03 (t,  $J = 7.1$  Hz, 3H).  $^{13}C\{^1H\}$  NMR (100 MHz,  $CDCl_3$ ):  $\delta$  174.2, 141.8, 135.6, 131.9, 121.9, 120.4, 119.6, 110.5, 95.7, 61.0, 36.7, 17.6, 13.9, 13.1. HRMS (ESI):  $m/z$   $[M + H]^+$  calcd for  $C_{14}H_{18}NO_2Se$ , 312.0497; found, 312.0491.

**N-Methyl-4-(phenylselanyl)aniline (5a).** Compound **5a** was prepared according to the general procedure and isolated as an oil (92 mg, 70% yield) after flash chromatography (petroleum ether/ethyl acetate = 20/1).  $^1H$  NMR (400 MHz,  $CDCl_3$ ):  $\delta$  7.44 (d,  $J = 8.6$  Hz, 2H), 7.28 – 7.23 (m, 2H), 7.22 – 7.04 (m, 3H), 6.54 (d,  $J = 8.6$  Hz, 2H), 3.83 (brs, 1H), 2.82 (s, 3H).  $^{13}C\{^1H\}$  NMR (100 MHz,  $CDCl_3$ ):  $\delta$  149.6, 137.4, 134.6, 129.8, 129.1, 125.9, 114.4, 113.3, 30.5. The data are in accordance with the literature.<sup>2</sup>

**3,4,5-Trimethoxy-2-(phenylselanyl)aniline (5b).** Compound **5b** was prepared according to the general procedure and isolated as a yellow solid (127 mg, 75% yield) after flash chromatography (petroleum ether/ethyl acetate = 5/1). mp=66-68 °C.  $^1H$  NMR (400 MHz,  $CDCl_3$ ):  $\delta$  7.24 – 7.09 (m, 5H), 6.21 (s, 1H), 4.32 (s, 2H), 3.85 (s, 3H), 3.80 (s, 3H), 3.78 (s, 3H).  $^{13}C\{^1H\}$  NMR (100 MHz,  $CDCl_3$ ):  $\delta$  155.9, 155.7,

146.1, 134.5, 132.6, 129.2, 128.5, 125.8, 99.1, 94.3, 61.4, 61.2, 55.8. HRMS (ESI):  $m/z$   $[M + H]^+$  calcd for  $C_{15}H_{18}NO_3Se$ , 340.0446; found, 340.0460.

**6-(Phenylselanyl)benzo[d][1,3]dioxol-5-amine (5c).** Compound **5c** was prepared according to the general procedure and isolated as a white solid (99 mg, 68% yield) after flash chromatography (petroleum ether/ethyl acetate = 8/1). mp=70-72 °C.  $^1H$  NMR (400 MHz,  $CDCl_3$ ):  $\delta$  7.16 – 7.06 (m, 5H), 6.98 (s, 1H), 6.33 (s, 1H), 5.83 (s, 2H), 4.07 (brs, 2H).  $^{13}C\{^1H\}$  NMR (100 MHz,  $CDCl_3$ ):  $\delta$  149.3, 143.6, 139.3, 131.3, 128.2, 127.8, 125.0, 116.0, 101.3, 100.0, 95.9. The data are in accordance with the literature.<sup>4</sup>

**Phenyl(2,4,6-trimethoxyphenyl)selane (5d).** Compound **5d** was prepared according to the general procedure and isolated as a white solid (134 mg, 83% yield) after flash chromatography (petroleum ether/ethyl acetate =25/1). mp = 103-105°C.  $^1H$  NMR (400 MHz,  $CDCl_3$ )  $\delta$  7.41 – 6.70 (m, 5H), 6.14 (s, 2H), 3.79 (s, 3H), 3.72 (s, 6H).  $^{13}C\{^1H\}$  NMR (100 MHz,  $CDCl_3$ )  $\delta$  161.9, 160.9, 132.5, 127.7, 127.6, 124.2, 96.0, 90.1, 55.3, 54.4. The data are in accordance with the literature.<sup>2</sup>

**3-(Phenylselanyl)imidazo[1,2-a]pyridine (5e).** Compound **5e** was prepared according to the general procedure and isolated as a white solid (90 mg, 66% yield) after flash chromatography (petroleum ether/ethyl acetate = 2/1). mp=59-61 °C.  $^1H$  NMR (400 MHz,  $CDCl_3$ ):  $\delta$  8.27 (d,  $J$  = 6.8 Hz, 1H), 7.98 (s, 1H), 7.69 (d,  $J$  = 9.0 Hz, 1H), 7.37 – 7.23 (m, 1H), 7.21 – 7.07 (m, 5H), 6.86 (td,  $J$  = 6.8, 1.1 Hz, 1H).  $^{13}C\{^1H\}$  NMR (100 MHz,  $CDCl_3$ ):  $\delta$  148.3, 143.1, 130.6, 129.5, 129.0, 126.8, 125.7, 125.2, 117.9, 113.1, 106.4. The data are in accordance with the literature.<sup>2</sup>

**1-(Phenylselanyl)naphthalen-2-ol (5f).** Compound **5f** was prepared according to the general procedure and isolated as a yellow solid (109 mg, 73% yield) after flash chromatography (petroleum ether/ethyl acetate = 8/1). mp=49-51 °C.  $^1H$  NMR (400 MHz,  $CDCl_3$ ):  $\delta$  8.27 (d,  $J$  = 8.5 Hz, 1H), 7.87 (d,  $J$  = 8.8 Hz, 1H), 7.78 (dd,  $J$  = 8.0, 1.2 Hz, 1H), 7.50 – 7.46 (m, 1H), 7.44 – 7.26 (m, 2H), 7.17 – 7.04 (m, 6H).  $^{13}C\{^1H\}$  NMR (100 MHz,  $CDCl_3$ ):  $\delta$  156.3, 135.8, 132.8, 130.6, 129.5, 129.1, 128.5, 128.0, 127.0, 126.6, 123.8, 116.6, 109.0. The data are in accordance with the literature.<sup>4</sup>

**1-(Phenylselanyl)naphthalen-2-amine (5g).** Compound **5g** was prepared according

to the general procedure and isolated as a brown solid (91 mg, 61% yield) after flash chromatography (petroleum ether/ethyl acetate = 8/1). mp=77-79 °C. <sup>1</sup>H NMR (400 MHz, CDCl<sub>3</sub>): δ 8.32 (d, *J* = 8.7 Hz, 1H), 7.73 (d, *J* = 8.8 Hz, 1H), 7.69 (d, *J* = 8.0 Hz, 1H), 7.47 – 7.40 (m, 1H), 7.31 – 7.22 (m, 1H), 7.17 – 7.08 (m, 5H), 7.05 (d, *J* = 8.8 Hz, 1H), 4.72 (s, 2H). <sup>13</sup>C{<sup>1</sup>H} NMR (100 MHz, CDCl<sub>3</sub>): δ 148.1, 136.9, 131.83, 131.76, 129.2, 128.6, 128.33, 128.32, 127.8, 126.6, 125.8, 122.5, 117.4, 105.5. The data are in accordance with the literature.<sup>4</sup>

**6-(Phenylselanyl)-1,2,3,4-tetrahydroquinoline (5h).** Compound **5h** was prepared according to the general procedure and isolated as a yellow solid (66 mg, 46% yield) after flash chromatography (petroleum ether/ethyl acetate = 5/1). mp=47-49 °C. <sup>1</sup>H NMR (400 MHz, CDCl<sub>3</sub>): δ 7.37 – 7.06 (m, 7H), 6.41 (d, *J* = 8.0 Hz, 1H), 3.96 (brs, 1H), 3.32 (t, *J* = 5.4 Hz, 2H), 2.73 (t, *J* = 6.4 Hz, 2H), 1.98 – 1.78 (m, 2H). <sup>13</sup>C{<sup>1</sup>H} NMR (100 MHz, CDCl<sub>3</sub>): δ 145.2, 137.4, 134.9, 134.8, 129.7, 129.0, 125.8, 122.4, 114.8, 41.8, 26.8, 21.7. The data are in accordance with the literature.<sup>2</sup>

**2-Phenyl-5-(phenylselanyl)thiophene (5i)** Compound **5i** was prepared according to the general procedure and isolated as an oil (121 mg, 77% yield) after flash chromatography (petroleum ether/ethyl acetate = 100/1). <sup>1</sup>H NMR (400 MHz, CDCl<sub>3</sub>): δ 7.58 – 7.54 (m, 2H), 7.45 – 7.33 (m, 4H), 7.29 (d, *J* = 3.8 Hz, 2H), 7.28 – 7.16 (m, 4H). <sup>13</sup>C{<sup>1</sup>H} NMR (100 MHz, CDCl<sub>3</sub>): δ 150.8, 138.0, 133.8, 133.4, 130.0, 129.3, 129.0, 128.0, 126.9, 125.9, 124.1, 122.6. The data are in accordance with the literature.<sup>7</sup>

**2-Methoxy-5-(phenylselanyl)thiophene (5j)** Compound **5j** was prepared according to the general procedure and isolated as an oil (82 mg, 61% yield) after flash chromatography (petroleum ether/ethyl acetate = 200/1). <sup>1</sup>H NMR (400 MHz, CDCl<sub>3</sub>): δ 7.31 (d, *J* = 6.9 Hz, 2H), 7.26 – 7.15 (m, 3H), 7.05 (d, *J* = 3.9 Hz, 1H), 6.16 (d, *J* = 3.8 Hz, 1H), 3.89 (s, 3H). <sup>13</sup>C{<sup>1</sup>H} NMR (100 MHz, CDCl<sub>3</sub>): δ 171.2, 136.5, 134.2, 129.2, 129.1, 129.0, 126.4, 107.7, 105.3, 60.2. The data are in accordance with the literature.<sup>2</sup>

## 5. General procedure for selenocyanation of electron rich arenes

The reaction was carried out in an open air system at ambient temperature. To a 10 mL vessel with magnetic stir bar were added 0.5 mmol indole, 0.5 mmol KSeCN, 0.5 mmol I<sub>2</sub>O<sub>5</sub> and 2 mL of MeOH. The reaction mixture was stirred for an indicated time. Then, the reaction was quenched with a saturated aqueous Na<sub>2</sub>S<sub>2</sub>O<sub>3</sub> solution and extracted with EtOAc. The combined organic layers were dried (Na<sub>2</sub>SO<sub>4</sub>) and concentrated to give a crude residue, which was purified by flash column chromatography.

**3-Selenocyanato-1H-indole (6a).** Compound **6a** was prepared according to the general procedure and isolated as a brown solid (88 mg, 80% yield) after flash chromatography (petroleum ether/ethyl acetate = 6/1). mp=107-109 °C. <sup>1</sup>H NMR (400 MHz, CDCl<sub>3</sub>): δ 8.68 (s, 1H), 7.79 – 7.66 (m, 1H), 7.47 (d, *J* = 2.8 Hz, 1H), 7.45 – 7.41 (m, 1H), 7.32 – 7.28 (m, 2H). <sup>13</sup>C{<sup>1</sup>H} NMR (100 MHz, CDCl<sub>3</sub>): δ 136.0, 131.8, 128.7, 123.8, 121.9, 119.6, 111.9, 101.9, 89.5. The data are in accordance with the literature.<sup>8</sup>

**Methyl 3-selenocyanato-1H-indole-4-carboxylate (6b).** Compound **6b** was prepared according to the general procedure and isolated as an oil (88 mg, 63% yield) after flash chromatography (petroleum ether/ethyl acetate = 3/1). <sup>1</sup>H NMR (400 MHz, CDCl<sub>3</sub>): δ 8.81 (brs, 1H), 7.87 (dd, *J* = 7.5, 1.0 Hz, 1H), 7.64 (dd, *J* = 8.2, 1.0 Hz, 1H), 7.59 (d, *J* = 2.8 Hz, 1H), 7.29 – 7.24 (m, 1H), 3.97 (s, 3H). <sup>13</sup>C{<sup>1</sup>H} NMR (100 MHz, CDCl<sub>3</sub>): δ 168.6, 137.9, 127.2, 125.4, 124.1, 122.3, 120.5, 117.5, 106.7, 92.4, 52.6. HRMS (ESI): *m/z* [M + H]<sup>+</sup> calcd for C<sub>11</sub>H<sub>9</sub>N<sub>2</sub>O<sub>2</sub>Se, 280.9824; found, 280.9829.

**Methyl 3-selenocyanato-1H-indole-6-carboxylate (6c).** Compound **6c** was prepared according to the general procedure and isolated as a yellow solid (92 mg, 66% yield) after flash chromatography (petroleum ether/ethyl acetate = 3/1). mp=166-168 °C. <sup>1</sup>H NMR (400 MHz, CDCl<sub>3</sub>): δ 8.94 (brs, 1H), 8.22 (d, *J* = 0.7 Hz, 1H), 7.99 (dd, *J* = 8.4, 1.4 Hz, 1H), 7.79 (d, *J* = 8.4, 0.7 Hz, 1H), 7.71 (d, *J* = 2.9 Hz, 1H), 3.97 (s, 3H). <sup>13</sup>C{<sup>1</sup>H} NMR (100 MHz, CDCl<sub>3</sub>): δ 167.5, 135.4, 134.6, 132.3, 125.8, 122.9, 119.5, 114.2, 101.2, 90.4, 52.3. HRMS (ESI): *m/z* [M + H]<sup>+</sup> calcd for C<sub>11</sub>H<sub>9</sub>N<sub>2</sub>O<sub>2</sub>Se,

280.9824; found, 280.9810.

**3-Selenocyanato-6-(trifluoromethyl)-1H-indole (6d).** Compound **6d** was prepared according to the general procedure and isolated as a yellow solid (79 mg, 55% yield) after flash chromatography (petroleum ether/ethyl acetate = 5/1). mp=101-103 °C. <sup>1</sup>H NMR (400 MHz, CDCl<sub>3</sub>): δ 10.69 (brs, 1H), 7.81 (d, *J* = 8.4 Hz, 1H), 7.74 (s, 1H), 7.66 (d, *J* = 2.8 Hz, 1H), 7.51 (dd, *J* = 8.4, 1.4 Hz, 1H). <sup>13</sup>C{<sup>1</sup>H} NMR (100 MHz, CDCl<sub>3</sub>): δ 135.4, 134.9, 131.1, 125.6 (q, *J*<sub>C-F</sub> = 32.2 Hz), 123.5, 119.9, 118.1 (q, *J*<sub>C-F</sub> = 3.5 Hz), 109.8 (d, *J*<sub>C-F</sub> = 4.4 Hz), 101.8, 89.0. <sup>19</sup>F NMR (376 MHz, CDCl<sub>3</sub>): δ -60.9. HRMS (ESI): *m/z* [M + H]<sup>+</sup> calcd for C<sub>10</sub>H<sub>6</sub>F<sub>3</sub>N<sub>2</sub>Se, 290.9643; found, 290.9642.

**5-Fluoro-3-selenocyanato-1H-indole (6e).** Compound **6e** was prepared according to the general procedure and isolated as a brown solid (82 mg, 69% yield) after flash chromatography (petroleum ether/ethyl acetate = 5/1). mp=104-105 °C. <sup>1</sup>H NMR (400 MHz, CDCl<sub>3</sub>): δ 8.73 (s, 1H), 7.55 (d, *J* = 2.9 Hz, 1H), 7.47 – 7.27 (m, 2H), 7.05 (td, *J* = 9.0, 2.5 Hz, 1H). <sup>13</sup>C{<sup>1</sup>H} NMR (100 MHz, CDCl<sub>3</sub>): δ 159.1 (d, *J*<sub>C-F</sub> = 238.7 Hz), 133.4, 132.4, 129.6 (d, *J*<sub>C-F</sub> = 10.5 Hz), 112.9 (d, *J*<sub>C-F</sub> = 9.6 Hz), 112.5 (d, *J*<sub>C-F</sub> = 26.5 Hz), 104.8 (d, *J*<sub>C-F</sub> = 24.9 Hz), 101.6, 89.6 (d, *J*<sub>C-F</sub> = 4.7 Hz). <sup>19</sup>F NMR (376 MHz, CDCl<sub>3</sub>): δ -120.9. The data are in accordance with the literature.<sup>9</sup>

**5-Chloro-3-selenocyanato-1H-indole (6f).** Compound **6f** was prepared according to the general procedure and isolated as a yellow solid (89 mg, 70% yield) after flash chromatography (petroleum ether/ethyl acetate = 2/1). mp=151-153 °C. <sup>1</sup>H NMR (400 MHz, CDCl<sub>3</sub>): δ 8.70 (brs, 1H), 7.73 (d, *J* = 1.9 Hz, 1H), 7.57 (d, *J* = 2.8 Hz, 1H), 7.37 (d, *J* = 8.7 Hz, 1H), 7.30 – 7.27 (m, 1H). <sup>13</sup>C{<sup>1</sup>H} NMR (100 MHz, CDCl<sub>3</sub>): δ 134.4, 133.0, 130.0, 128.0, 124.4, 119.3, 112.9, 101.2, 89.5. The data are in accordance with the literature.<sup>9</sup>

**5-Bromo-3-selenocyanato-1H-indole (6g).** Compound **6g** was prepared according to the general procedure and isolated as a yellow solid (95 mg, 63% yield) after flash chromatography (petroleum ether/ethyl acetate = 3/1). mp=155-156 °C. <sup>1</sup>H NMR (400 MHz, DMSO-*d*<sub>6</sub>) δ 12.06 (brs, 1H), 7.93 (d, *J* = 2.7 Hz, 1H), 7.70 (d, *J* = 1.9 Hz, 1H), 7.49 (d, *J* = 8.6 Hz, 1H), 7.36 (dd, *J* = 8.6, 1.9 Hz, 1H). <sup>13</sup>C{<sup>1</sup>H} NMR (100 MHz, DMSO-*d*<sub>6</sub>): δ 135.4, 135.1, 131.0, 125.6, 121.4, 115.0, 113.8, 104.9, 89.5. The data

are in accordance with the literature.<sup>8</sup>

**3-Selenocyanato-1*H*-indole-5-carbonitrile (6h).** Compound **6h** was prepared according to the general procedure and isolated as a white solid (63 mg, 51% yield) after flash chromatography (petroleum ether/ethyl acetate = 3/1). mp=187-189 °C. <sup>1</sup>H NMR (400 MHz, DMSO-*d*<sub>6</sub>): δ 12.37 (brs, 1H), 8.09 – 8.07 (m, 2H), 7.69 (d, *J* = 8.4 Hz, 1H), 7.61 (dd, *J* = 8.5, 1.6 Hz, 1H). <sup>13</sup>C{<sup>1</sup>H} NMR (100 MHz, DMSO-*d*<sub>6</sub>): δ 138.6, 136.3, 129.0, 125.8, 124.7, 120.5, 114.3, 105.0, 103.4, 91.6. The data are in accordance with the literature.<sup>8</sup>

**5-Methyl-3-selenocyanato-1*H*-indole (6i).** Compound **6i** was prepared according to the general procedure and isolated as a yellow solid (89 mg, 76% yield) after flash chromatography (petroleum ether/ethyl acetate = 5/1). mp=104-106 °C. <sup>1</sup>H NMR (400 MHz, CDCl<sub>3</sub>): δ 8.62 (brs, 1H), 7.51 (s, 1H), 7.40 (d, *J* = 2.8 Hz, 1H), 7.29 (d, *J* = 8.3 Hz, 1H), 7.11 (dd, *J* = 8.3, 1.5 Hz, 1H), 2.50 (s, 3H). <sup>13</sup>C{<sup>1</sup>H} NMR (100 MHz, CDCl<sub>3</sub>): δ 134.3, 131.8, 131.4, 128.9, 125.4, 119.1, 111.6, 102.2, 88.8, 21.6. The data are in accordance with the literature.<sup>10</sup>

**5-Methoxy-3-selenocyanato-1*H*-indole (6j).** Compound **6j** was prepared according to the general procedure and isolated as a yellow solid (100 mg, 80% yield) after flash chromatography (petroleum ether/ethyl acetate = 3/1). mp=108-109 °C. <sup>1</sup>H NMR (400 MHz, DMSO-*d*<sub>6</sub>): δ 11.75 (brs, 1H), 7.80 (d, *J* = 2.8 Hz, 1H), 7.41 (d, *J* = 8.8 Hz, 1H), 7.02 (d, *J* = 2.4 Hz, 1H), 6.88 (dd, *J* = 8.8, 2.4 Hz, 1H), 3.82 (s, 3H). <sup>13</sup>C{<sup>1</sup>H} NMR (100 MHz, DMSO-*d*<sub>6</sub>): δ 155.1, 134.1, 131.5, 129.8, 113.8, 113.2, 104.7, 100.5, 88.8, 55.9. The data are in accordance with the literature.<sup>8</sup>

**1-Methyl-3-selenocyanato-1*H*-indole (6k).** Compound **6k** was prepared according to the general procedure and isolated as a yellow solid (96 mg, 82% yield) after flash chromatography (petroleum ether/ethyl acetate = 10/1). mp=95-97 °C. <sup>1</sup>H NMR (400 MHz, CDCl<sub>3</sub>): δ 7.73 (d, *J* = 7.5 Hz, 1H), 7.54 – 6.76 (m, 4H), 3.79 (s, 3H). <sup>13</sup>C{<sup>1</sup>H} NMR (100 MHz, CDCl<sub>3</sub>): δ 137.2, 136.0, 129.5, 123.3, 121.5, 119.8, 110.1, 101.9, 87.2, 33.4. The data are in accordance with the literature.<sup>8</sup>

**1-Benzyl-3-selenocyanato-1*H*-indole (6l).** Compound **6l** was prepared according to the general procedure and isolated as a yellow solid (135 mg, 87% yield) after flash

chromatography (petroleum ether/ethyl acetate = 15/1). mp=88-90 °C. <sup>1</sup>H NMR (400 MHz, CDCl<sub>3</sub>): δ 7.90 – 7.58 (m, 2H), 7.38 – 7.20 (m, 6H), 7.14 – 7.11 (m, 2H), 5.29 (s, 2H). <sup>13</sup>C{<sup>1</sup>H} NMR (100 MHz, CDCl<sub>3</sub>): δ 136.8, 135.9, 135.2, 129.7, 129.1, 128.3, 127.2, 123.5, 121.8, 120.0, 110.6, 101.8, 88.2, 50.7. The data are in accordance with the literature.<sup>8</sup>

**2-Phenyl-3-selenocyanato-1H-indole (6m)**. Compound **6m** was prepared according to the general procedure and isolated as a yellow solid (107 mg, 72% yield) after flash chromatography (petroleum ether/ethyl acetate = 10/1). mp=151-153 °C. <sup>1</sup>H NMR (400 MHz, DMSO-*d*<sub>6</sub>): δ 12.25 (brs, 1H), 7.87 (d, *J* = 7.0 Hz, 2H), 7.67 – 7.64 (m, 1H), 7.62 – 7.59 (m, 2H), 7.54 – 7.50 (m, 2H), 7.31 – 7.24 (m, 2H). <sup>13</sup>C{<sup>1</sup>H} NMR (100 MHz, DMSO-*d*<sub>6</sub>): δ 143.2, 136.6, 131.4, 130.9, 129.6, 129.4, 129.1, 123.5, 121.5, 119.7, 112.6, 105.2, 88.6. The data are in accordance with the literature.<sup>9</sup>

***N,N*-Dimethyl-4-selenocyanatoaniline (6n)**. Compound **6n** was prepared according to the general procedure and isolated as a yellow solid (92 mg, 82% yield) after flash chromatography (petroleum ether/ethyl acetate = 25/1). mp=81-83 °C. <sup>1</sup>H NMR (400 MHz, DMSO-*d*<sub>6</sub>): δ 7.50 (d, *J* = 8.9 Hz, 2H), 6.72 (d, *J* = 8.9 Hz, 2H). <sup>13</sup>C{<sup>1</sup>H} NMR (100 MHz, DMSO-*d*<sub>6</sub>): δ 151.6, 136.5, 136.5, 113.7, 106.5, 105.9., 40.2. The data are in accordance with the literature.<sup>8</sup>

**1-Selenocyanatonaphthalen-2-amine (6o)**. Compound **6o** was prepared according to the general procedure and isolated as an oil (58 mg, 47% yield) after flash chromatography (petroleum ether/ethyl acetate = 5/1). <sup>1</sup>H NMR (400 MHz, DMSO-*d*<sub>6</sub>): δ 7.90 (d, *J* = 8.1 Hz, 1H), 7.75 (d, *J* = 8.7 Hz, 1H), 7.72 (brs, 2H), 7.62 (d, *J* = 7.5 Hz, 1H), 7.54 (d, *J* = 8.6 Hz, 1H), 7.48 (ddd, *J* = 8.2, 6.9, 1.3 Hz, 1H), 7.37 (ddd, *J* = 8.1, 6.8, 1.2 Hz, 1H). The data are in accordance with the literature.<sup>11</sup>

**1,3,5-Trimethoxy-2-selenocyanatobenzene (6p)**. Compound **6p** was prepared according to the general procedure and isolated as an oil (75 mg, 55% yield) after flash chromatography (petroleum ether/ethyl acetate = 6/1). <sup>1</sup>H NMR (400 MHz, DMSO-*d*<sub>6</sub>): δ 6.37 (s, 2H), 3.86 (s, 6H), 3.84 (s, 3H). <sup>13</sup>C{<sup>1</sup>H} NMR (100 MHz, DMSO-*d*<sub>6</sub>): δ 164.3, 161.1, 104.5, 92.1, 90.6, 56.9, 56.1. The data are in accordance with the literature.<sup>8</sup>

## 6. General procedure for thiocyanation of electron rich arenes

The reaction was carried out in an open air system at ambient temperature. To a 10 mL vessel with magnetic stir bar were added 0.5 mmol indole, 0.5 mmol KSCN, 0.5 mmol I<sub>2</sub>O<sub>5</sub> and 2 mL of MeOH. The reaction mixture was stirred for an indicated time. Then, the reaction was quenched with a saturated aqueous Na<sub>2</sub>S<sub>2</sub>O<sub>3</sub> solution and extracted with EtOAc. The combined organic layers were dried (Na<sub>2</sub>SO<sub>4</sub>) and concentrated to give a crude residue, which was purified by flash column chromatography.

**3-Thiocyanato-1H-indole (7a).** Compound **7a** was prepared according to the general procedure and isolated as a red solid (70 mg, 80% yield) after flash chromatography (petroleum ether/ethyl acetate = 5/1). mp=49-50 °C. <sup>1</sup>H NMR (400 MHz, CDCl<sub>3</sub>): δ 8.64 (brs, 1H), 8.02 – 7.68 (m, 1H), 7.53 (d, *J* = 2.8 Hz, 1H), 7.49 – 7.38 (m, 1H), 7.38 – 7.27 (m, 2H). <sup>13</sup>C{<sup>1</sup>H} NMR (100 MHz, CDCl<sub>3</sub>): δ 136.0, 130.9, 127.7, 124.0, 122.0, 118.9, 112.0, 111.7, 92.6. The data are in accordance with the literature.<sup>8</sup>

**5-Fluoro-3-thiocyanato-1H-indole (7b).** Compound **7b** was prepared according to the general procedure and isolated as a yellow solid (68 mg, 71% yield) after flash chromatography (petroleum ether/ethyl acetate = 5/1). mp=87-89 °C. <sup>1</sup>H NMR (400 MHz, CDCl<sub>3</sub>): δ 10.22 (brs, 1H), 7.54 (d, *J* = 3.0 Hz, 1H), 7.41 (dd, *J* = 9.0, 2.5 Hz, 1H), 7.36 (dd, *J* = 8.9, 4.2 Hz, 1H), 7.02 (td, *J* = 9.0, 2.5 Hz, 1H). <sup>13</sup>C{<sup>1</sup>H} NMR (100 MHz, CDCl<sub>3</sub>): 158.9 (d, *J*<sub>C-F</sub> = 238.2 Hz), 133.2, 132.8, 128.5 (d, *J*<sub>C-F</sub> = 10.5 Hz), 113.3 (d, *J*<sub>C-F</sub> = 9.7 Hz), 112.3, 112.0, 103.7 (d, *J*<sub>C-F</sub> = 24.8 Hz), 91.2 (d, *J*<sub>C-F</sub> = 4.8 Hz). <sup>19</sup>F NMR (376 MHz, CDCl<sub>3</sub>): δ -121.4. The data are in accordance with the literature.<sup>12</sup>

**5-Chloro-3-thiocyanato-1H-indole (7c).** Compound **7c** was prepared according to the general procedure and isolated as a white solid (78 mg, 75% yield) after flash chromatography (petroleum ether/ethyl acetate = 5/1). mp=123-125 °C. <sup>1</sup>H NMR (400 MHz, CDCl<sub>3</sub>): δ 10.49 (brs, 1H), 7.74 (d, *J* = 1.9 Hz, 1H), 7.54 (d, *J* = 2.9 Hz, 1H), 7.35 (d, *J* = 8.6 Hz, 1H), 7.23 (dd, *J* = 8.7, 2.0 Hz, 1H). <sup>13</sup>C{<sup>1</sup>H} NMR (100 MHz, CDCl<sub>3</sub>): 134.8, 133.0, 128.9, 127.5, 123.9, 118.0, 113.5, 111.9, 90.8. The data are in



accordance with the literature.<sup>13</sup>

**5-Bromo-3-thiocyanato-1H-indole (7d).** Compound **7d** was prepared according to the general procedure and isolated as a brown solid (98 mg, 78% yield) after flash chromatography (petroleum ether/ethyl acetate = 8/1). mp=99-101 °C. <sup>1</sup>H NMR (400 MHz, DMSO-*d*<sub>6</sub>): δ 12.21 (brs, 1H), 8.07 (d, *J* = 2.6 Hz, 1H), 7.81 (d, *J* = 1.9 Hz, 1H), 7.51 (d, *J* = 8.6 Hz, 1H), 7.40 (dd, *J* = 8.7, 1.9 Hz, 1H). <sup>13</sup>C{<sup>1</sup>H} NMR (100 MHz, DMSO-*d*<sub>6</sub>): δ 135.6, 135.2, 129.7, 126.1, 120.4, 115.4, 114.2, 112.6, 89.9. The data are in accordance with the literature.<sup>8</sup>

**4-Methyl-3-thiocyanato-1H-indole (7e).** Compound **7e** was prepared according to the general procedure and isolated as a white solid (69 mg, 73% yield) after flash chromatography (petroleum ether/ethyl acetate = 5/1). mp=121-123 °C. <sup>1</sup>H NMR (400 MHz, CDCl<sub>3</sub>): δ 8.66 (brs, 1H), 7.46 (d, *J* = 2.8 Hz, 1H), 7.31 – 7.21 (m, 1H), 7.16 (t, *J* = 7.7 Hz, 1H), 7.05 – 6.90 (m, 1H), 2.93 (s, 3H). <sup>13</sup>C{<sup>1</sup>H} NMR (100 MHz, CDCl<sub>3</sub>): δ 136.5, 132.1, 131.1, 125.6, 124.0, 123.5, 113.4, 110.1, 92.2, 19.2. The data are in accordance with the literature.<sup>12</sup>

**5-Methyl-3-thiocyanato-1H-indole (7f).** Compound **7f** was prepared according to the general procedure and isolated as a yellow solid (77 mg, 82% yield) after flash chromatography (petroleum ether/ethyl acetate = 3/1). mp=67-69 °C. <sup>1</sup>H NMR (400 MHz, CDCl<sub>3</sub>): δ 8.45 (brs, 1H), 7.57 – 7.49 (m, 1H), 7.43 (d, *J* = 2.9 Hz, 1H), 7.26 (d, *J* = 8.3 Hz, 1H), 7.08 (dd, *J* = 8.4, 1.6 Hz, 1H), 2.44 (s, 3H). <sup>13</sup>C{<sup>1</sup>H} NMR (100 MHz, CDCl<sub>3</sub>): δ 134.3, 131.6, 130.8, 128.0, 125.6, 118.4, 111.8, 111.6, 91.9, 21.5. The data are in accordance with the literature.<sup>12</sup>

**3-Thiocyanato-6-(trifluoromethyl)-1H-indole (7g).** Compound **7g** was prepared according to the general procedure and isolated as a yellow solid (102 mg, 84% yield) after flash chromatography (petroleum ether/ethyl acetate = 6/1). mp=84-86 °C. <sup>1</sup>H NMR (400 MHz, CDCl<sub>3</sub>): δ 9.07 (s, 1H), 7.80 (d, *J* = 8.4 Hz, 1H), 7.64 (s, 1H), 7.58 (d, *J* = 2.8 Hz, 1H), 7.45 (dd, *J* = 8.4, 1.4 Hz, 1H). <sup>13</sup>C{<sup>1</sup>H} NMR (100 MHz, CDCl<sub>3</sub>): δ 134.0, 132.5, 128.9, 125.2 (q, *J*<sub>C-F</sub> = 33.0 Hz), 122.2, 118.3, 117.6 (d, *J*<sub>C-F</sub> = 3.4 Hz), 110.6, 108.8 (q, *J*<sub>C-F</sub> = 4.5 Hz), 91.9. <sup>19</sup>F NMR (376 MHz, CDCl<sub>3</sub>): δ -61.0. HRMS (ESI): *m/z* [M + H]<sup>+</sup> calcd for C<sub>10</sub>H<sub>6</sub>F<sub>3</sub>N<sub>2</sub>S, 243.0198; found, 243.0213.

**3-Thiocyanato-1*H*-indole-7-carbaldehyde (7h).** Compound **7h** was prepared according to the general procedure and isolated as a yellow solid (61 mg, 60% yield) after flash chromatography (petroleum ether/ethyl acetate = 15/1). mp=152-153 °C. <sup>1</sup>H NMR (400 MHz, DMSO-*d*<sub>6</sub>): δ 12.38 (brs, 1H), 10.21 (s, 1H), 8.07 (dt, *J* = 7.8, 0.9 Hz, 1H), 8.03 (d, *J* = 3.0 Hz, 1H), 7.96 (dd, *J* = 7.3, 1.1 Hz, 1H), 7.51 (t, *J* = 7.6 Hz, 1H). <sup>13</sup>C{<sup>1</sup>H} NMR (100 MHz, DMSO-*d*<sub>6</sub>): δ 193.4, 135.5, 133.1, 130.3, 129.2, 125.4, 122.1, 121.6, 112.6, 92.0. HRMS (ESI): *m/z* [M + H]<sup>+</sup> calcd for C<sub>10</sub>H<sub>7</sub>N<sub>2</sub>OS, 203.0274; found, 203.0260.

**2-Methyl-3-thiocyanato-1*H*-indole (7i).** Compound **7i** was prepared according to the general procedure and isolated as a pink solid (70 mg, 74% yield) after flash chromatography (petroleum ether/ethyl acetate = 5/1). mp=89-91 °C. <sup>1</sup>H NMR (400 MHz, CDCl<sub>3</sub>): δ 8.53 (brs, 1H), 7.66 (d, *J* = 7.0 Hz, 1H), 7.31 – 7.26 (m, 1H), 7.26 – 7.18 (m, 2H), 2.48 (s, 3H). <sup>13</sup>C{<sup>1</sup>H} NMR (100 MHz, CDCl<sub>3</sub>): δ 142.0, 135.1, 128.7, 123.0, 121.6, 118.1, 112.1, 111.2, 88.9, 12.1. The data are in accordance with the literature.<sup>8</sup>

**1-Methyl-3-thiocyanato-1*H*-indole (7j).** Compound **7j** was prepared according to the general procedure and isolated as a yellow solid (71 mg, 76% yield) after flash chromatography (petroleum ether/ethyl acetate = 15/1). mp=61-63 °C. <sup>1</sup>H NMR (400 MHz, CDCl<sub>3</sub>): δ 7.85 – 7.65 (m, 1H), 7.43 – 7.27 (m, 4H), 3.79 (s, 3H). <sup>13</sup>C{<sup>1</sup>H} NMR (100 MHz, CDCl<sub>3</sub>): δ 137.2, 135.1, 128.5, 123.5, 121.6, 119.0, 111.9, 110.2, 89.9, 33.5. The data are in accordance with the literature.<sup>8</sup>

**1,3,5-Trimethoxy-2-thiocyanatobenzene (7k).** Compound **7k** was prepared according to the general procedure and isolated as an oil (57 mg, 51% yield) after flash chromatography (petroleum ether/ethyl acetate = 6/1). <sup>1</sup>H NMR (400 MHz, DMSO-*d*<sub>6</sub>): δ 6.39 (s, 2H), 3.90 (s, 6H), 3.85 (s, 3H). <sup>13</sup>C{<sup>1</sup>H} (100 MHz, DMSO-*d*<sub>6</sub>): δ 164.7, 161.4, 112.4, 92.4, 88.6, 57.1, 56.3. The data are in accordance with the literature.<sup>13</sup>

**1-Thiocyanatonaphthalen-2-amine (7l).** Compound **7l** was prepared according to the general procedure and isolated as an oil (42 mg, 42% yield) after flash chromatography (petroleum ether/ethyl acetate = 4/1). <sup>1</sup>H NMR (400 MHz,

DMSO-*d*<sub>6</sub>):  $\delta$  7.93 (d,  $J = 8.1$  Hz, 1H), 7.77 (d,  $J = 8.7$  Hz, 1H), 7.72 (d,  $J = 8.2$  Hz, 1H), 7.64 (brs, 2H), 7.58 (d,  $J = 8.7$  Hz, 1H), 7.56 – 7.49 (m, 1H), 7.43 – 7.28 (m, 1H). The data are in accordance with the literature.<sup>11</sup>

***N,N*-Dimethyl-4-thiocyanatoaniline (7m)**. Compound **7m** was prepared according to the general procedure and isolated as an oil (56 mg, 63% yield) after flash chromatography (petroleum ether/ethyl acetate = 40/1). <sup>1</sup>H NMR (400 MHz, DMSO-*d*<sub>6</sub>):  $\delta$  7.46 (d,  $J = 9.0$  Hz, 2H), 6.77 (d,  $J = 9.0$  Hz, 2H). <sup>13</sup>C{<sup>1</sup>H} (100 MHz, DMSO-*d*<sub>6</sub>): 152.0, 134.8, 113.7, 113.4, 106.1, 40.2. The data are in accordance with the literature.<sup>8</sup>

## 7. Gram-Scale Reaction for the Synthesis of 3an

To a 50 mL round-bottom flask with magnetic stir bar were added 5-methoxy-1*H*-indole (0.735 g, 5 mmol), Ph<sub>2</sub>Se<sub>2</sub> (1.560 g, 5 mmol), I<sub>2</sub>O<sub>5</sub> (1.670 g, 5 mmol) and 20 mL of CH<sub>3</sub>CN. The reaction mixture was stirred at room temperature in the open air and the reaction was monitored by TLC. After completion of reaction, the reaction was next quenched with a saturated aqueous Na<sub>2</sub>S<sub>2</sub>O<sub>3</sub> solution and extracted with EtOAc. The combined organic layers were dried (Na<sub>2</sub>SO<sub>4</sub>) and concentrated to give a crude residue, which was purified by flash column chromatography (silica gel, petroleum ether : ethyl acetate = 10:1) to give **3an** in 82% yield (1.238 g).

## 8. Control Experiments

To a 10 mL vessel with magnetic stir bar were added N-3-butenylindole **1x** (85.5 mg, 0.5 mmol), Ph<sub>2</sub>Se<sub>2</sub> (156.0 mg, 0.5 mmol), I<sub>2</sub>O<sub>5</sub> (167.0 mg, 0.5 mmol) and 2 mL of CH<sub>3</sub>CN. The reaction mixture was stirred for an indicated time. Then, the reaction was quenched with a saturated aqueous Na<sub>2</sub>S<sub>2</sub>O<sub>3</sub> solution and extracted with EtOAc. The combined organic layers were dried (Na<sub>2</sub>SO<sub>4</sub>) and concentrated to give a crude residue, which was purified by flash column chromatography (silica gel, petroleum ether : ethyl acetate = 40:1) to give **3aw** and **3aw'**.

**1-(But-3-en-1-yl)-3-(phenylselanyl)-1*H*-indole (3aw)**. Oil, 72 mg, 44% yield. <sup>1</sup>H

NMR (400 MHz, CDCl<sub>3</sub>): δ 7.54 (d, *J* = 7.9 Hz, 1H), 7.38 – 7.25 (m, 2H), 7.21 – 7.19 (m, 1H), 7.16 – 7.07 (m, 3H), 7.06 – 6.98 (m, 3H), 5.96 – 5.61 (m, 1H), 5.02 – 4.98 (m, 1H), 4.97 (t, *J* = 1.5 Hz, 1H), 4.14 (t, *J* = 7.1 Hz, 2H), 2.53 (qt, *J* = 7.0, 1.3 Hz, 2H). <sup>13</sup>C{<sup>1</sup>H} NMR (100 MHz, CDCl<sub>3</sub>): δ 135.6, 133.7, 133.2, 133.1, 129.7, 127.8, 127.4, 127.3, 124.4, 121.3, 119.5, 119.4, 116.8, 108.6, 94.9, 45.2, 33.4. The data are in accordance with the literature.<sup>14</sup>

**9-(Phenylselanyl)-1-((phenylselanyl)methyl)-2,3-dihydro-1H-pyrrolo[1,2-a]indole (3aw’)**. Oil, 29 mg, 12% yield. <sup>1</sup>H NMR (400 MHz, CDCl<sub>3</sub>): δ 7.60 (d, *J* = 7.7 Hz, 1H), 7.54 (d, *J* = 7.1 Hz, 2H), 7.39 – 7.20 (m, 5H), 7.18 – 7.06 (m, 6H), 4.35 – 4.22 (m, 1H), 4.10 – 4.02 (m, 1H), 3.75 – 3.69 (m, 1H), 3.51 (dd, *J* = 17.2, 4.9 Hz, 1H), 3.15 (dd, *J* = 17.2, 7.9 Hz, 1H), 2.52 – 2.37 (m, 1H), 2.28 – 2.18 (m, 1H). <sup>13</sup>C{<sup>1</sup>H} NMR (100 MHz, CDCl<sub>3</sub>): δ 140.7, 136.6, 135.5, 134.0, 130.9, 129.2, 129.0, 128.4, 128.2, 127.7, 125.4, 121.6, 120.9, 119.6, 109.0, 93.8, 41.6, 35.9, 30.7, 29.7. HRMS (ESI): *m/z* [M + H]<sup>+</sup> calcd for C<sub>24</sub>H<sub>22</sub>NSe<sub>2</sub>, 484.0077; found, 484.0075.

## 9. References

1. D. Singh, A. M. Deobald, L. R. S. Camargo, G. Tabarelli, O. E. D. Rodrigues and A. L. Braga, *Org. Lett.*, 2010, **12**, 3288.
2. Q.-B. Zhang, Y.-L. Ban, P.-F. Yuan, S.-J. Peng, J.-G. Fang, L.-Z. Wu and Q. Liu, *Green Chem.*, 2017, **19**, 5559.
3. X. Zhang, C. Wang, H. Jiang and L. Sun, *Chem. Commun.*, 2018, **54**, 8781.
4. S. Saba, J. Rafique, M. S. Franco, A. R. Schneider, L. Espíndola, D. O. Silva and A. L. Braga, *Org. Biomol. Chem.*, 2018, **16**, 880.
5. V. Rathore and S. Kumar, *Green Chem.*, 2019, **21**, 2670.
6. M. Lin, L. Kang, J. Gu, L. Dai, S. Tang, T. Zhang, Y. Wang, L. Li, X. Zheng, W. Zhu, R. Si, X. Fu, L. Sun, Y. Zhang and C. Yan, *Nano Res.*, 2017, **10**, 922.
7. L. Sun, L. Wang, H. Alhumade, H. Yi, H. Cai and A. Lei, *Org. Lett.*, 2021, **23**, 7724.
8. N. Muniraj, J. Dhineshkumar and K. R. Prabhu, *ChemistrySelect*, 2016, **1**, 1033.
9. Q. Xie, Y. Yang, W. Zhang, Z. Gao, X. Li, J. Tang, C. Pan and G. Yu, *Chem. Sci.*, 2021, **12**, 5631.
10. Y. Wu, X. Tian, H. Zhang, R. Chen and T. Cao, *Chin. J. Org. Chem.*, 2020, **40**, 1384.
11. R. T. Oakley, R. W. Reed, C. M. Robertson and J. F. Richardson, *Inorg. Chem.*, 2005, **44**, 1837.
12. W. Fan, Q. Yang, F. Xu and P. Li, *J. Org. Chem.*, 2014, **79**, 10588.
13. X. Zhang, C. Wang, H. Jiang and L. Sun, *RSC Adv.*, 2018, **8**, 22042.
14. I. D. Lemir, W. D. Castro-Godoy, A. A. Heredia, L. C. Schmidt and J. E. Argüello, *RSC Adv.*, 2019, **9**, 22685.

## 10. Copies of NMR spectra

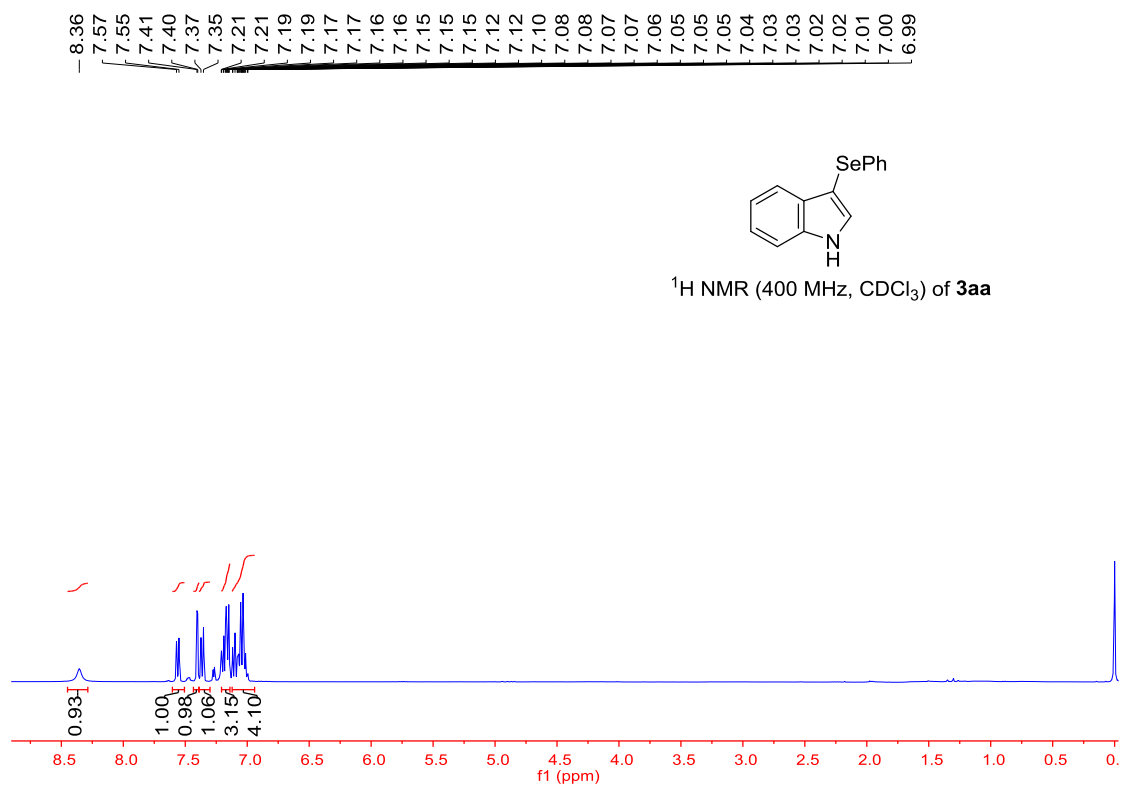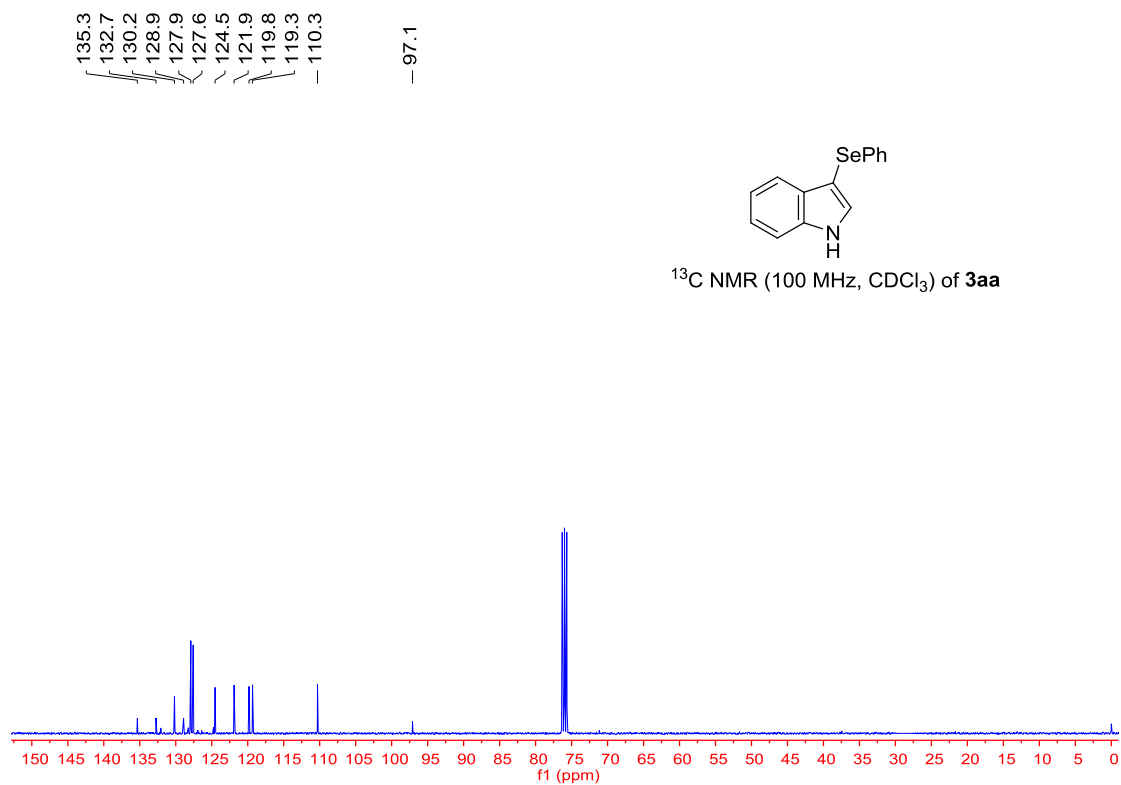

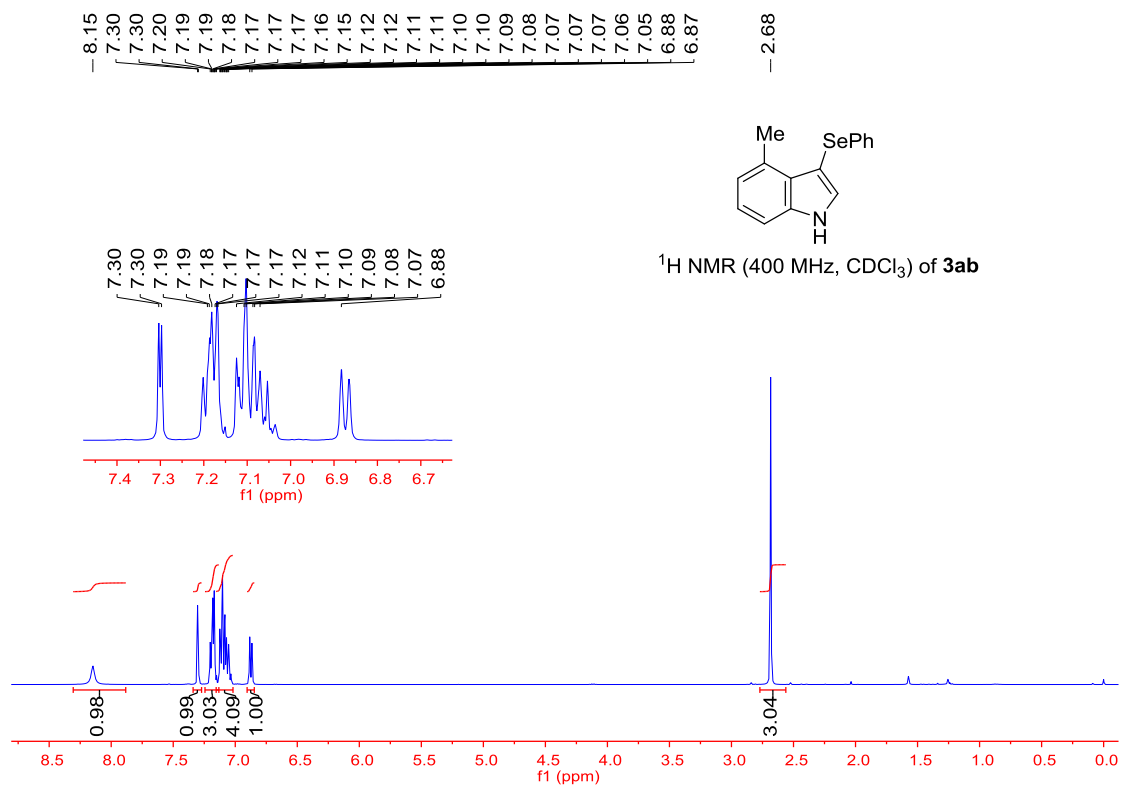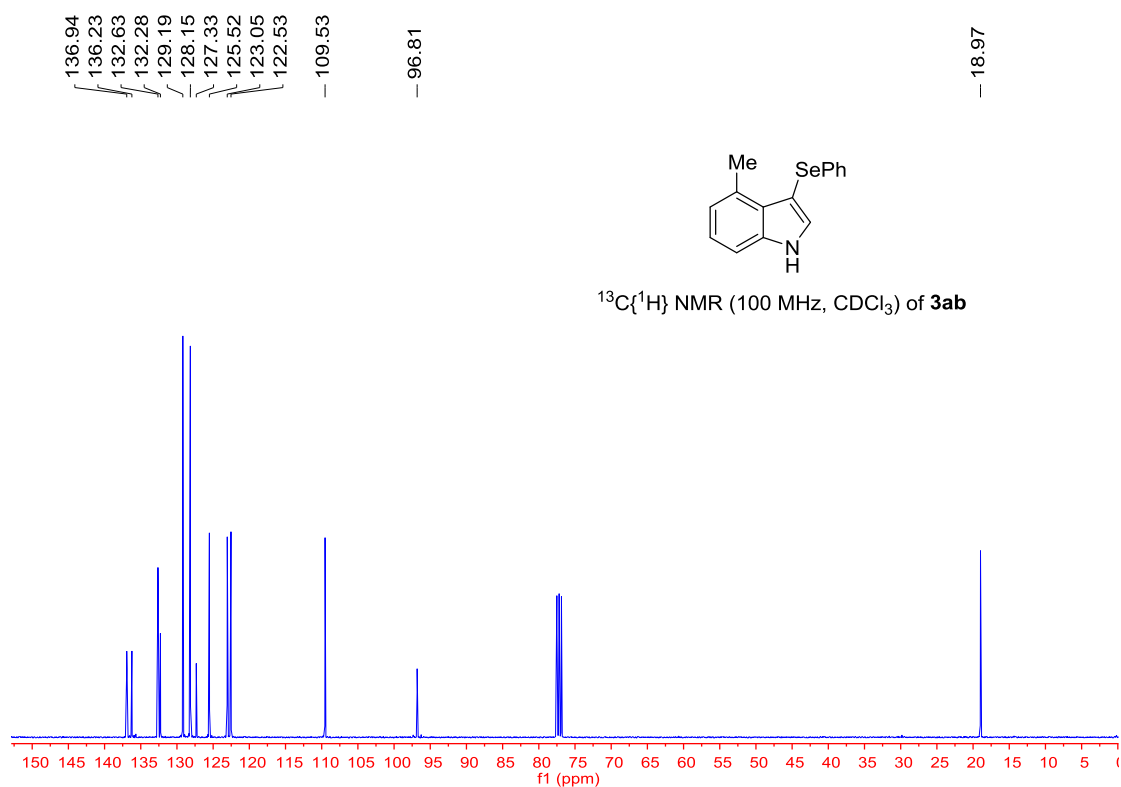

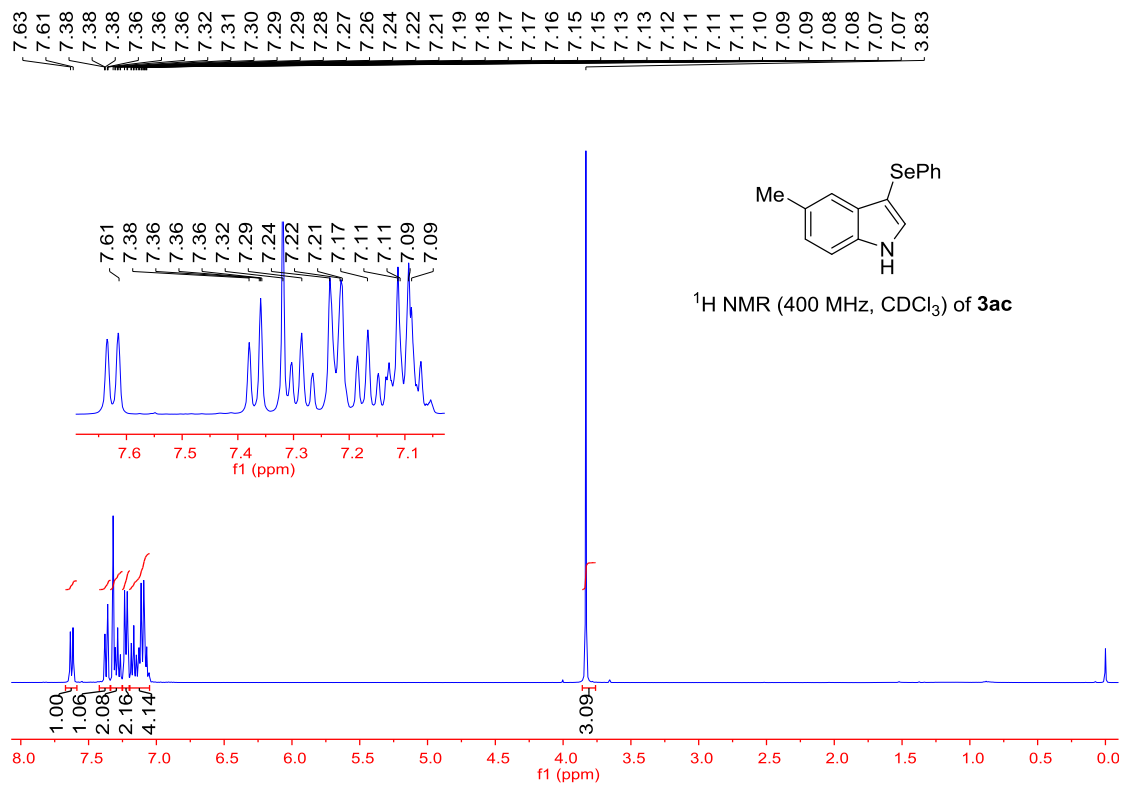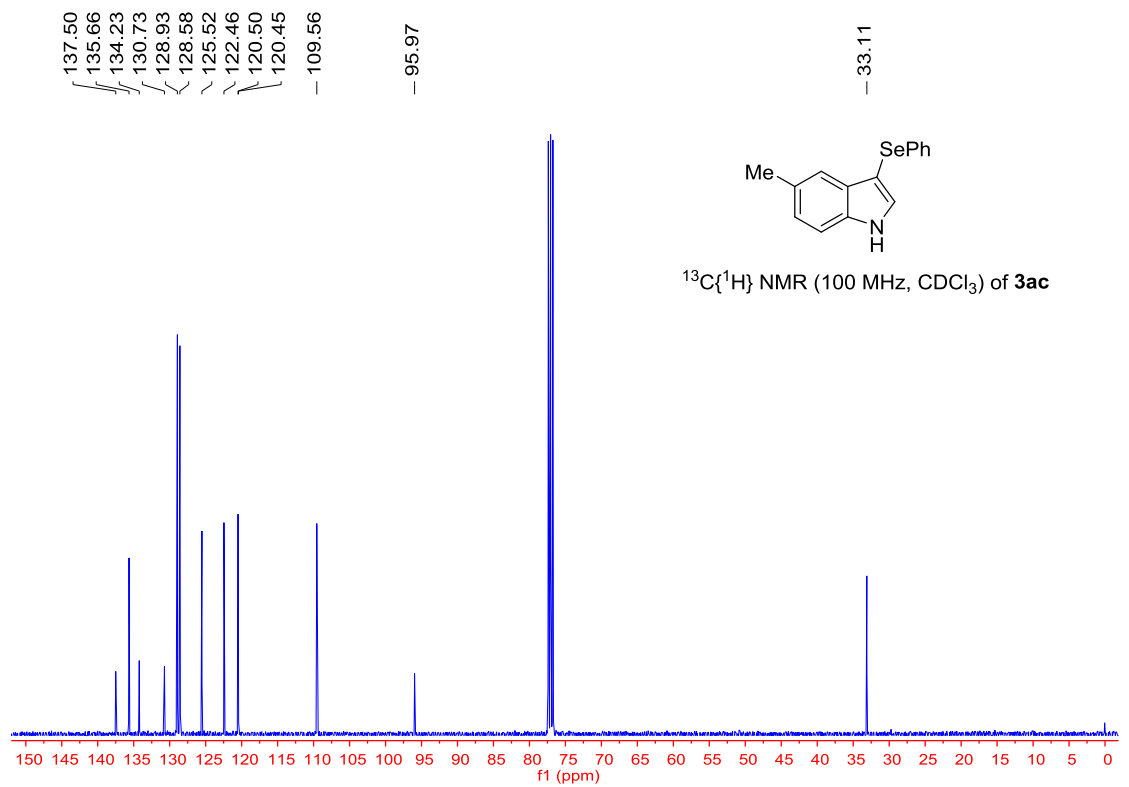

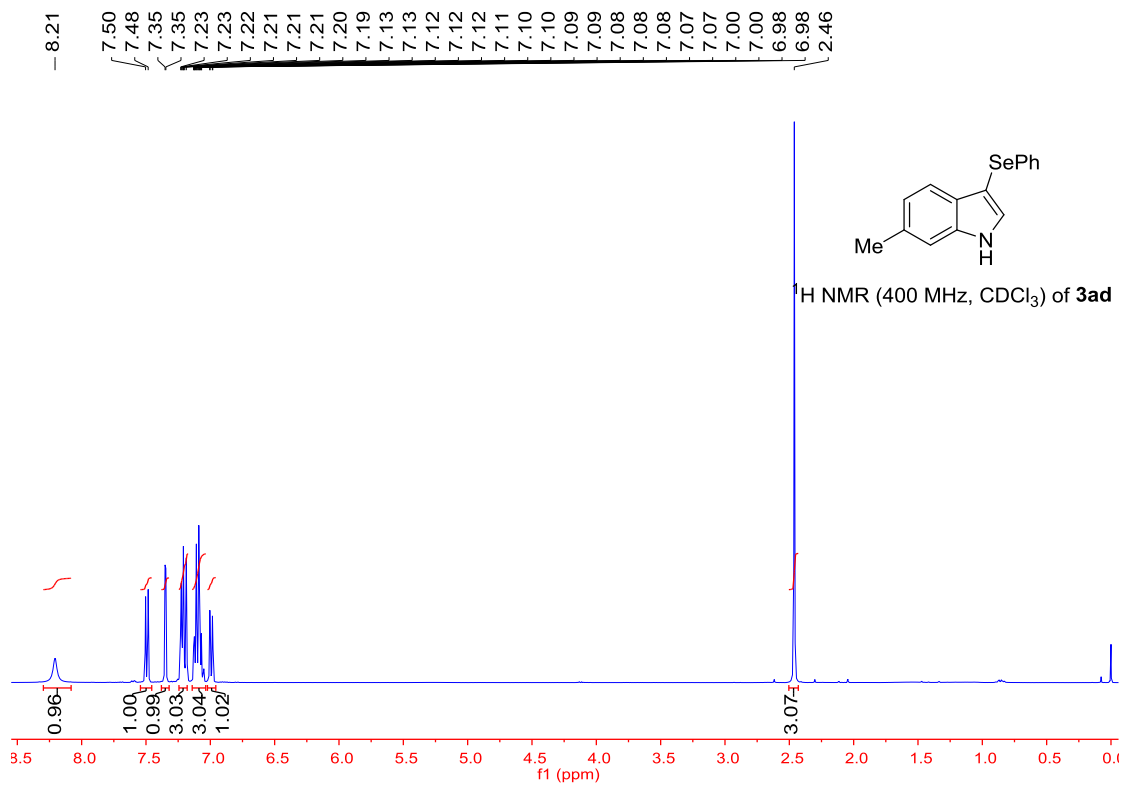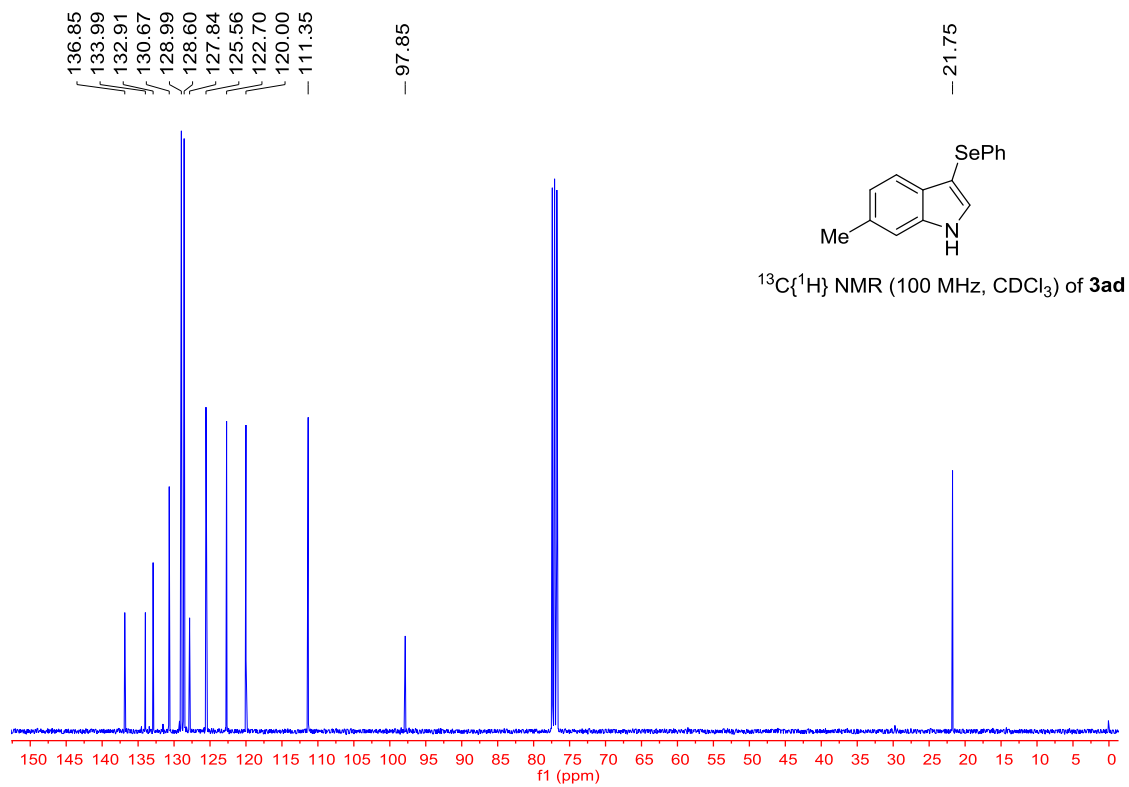



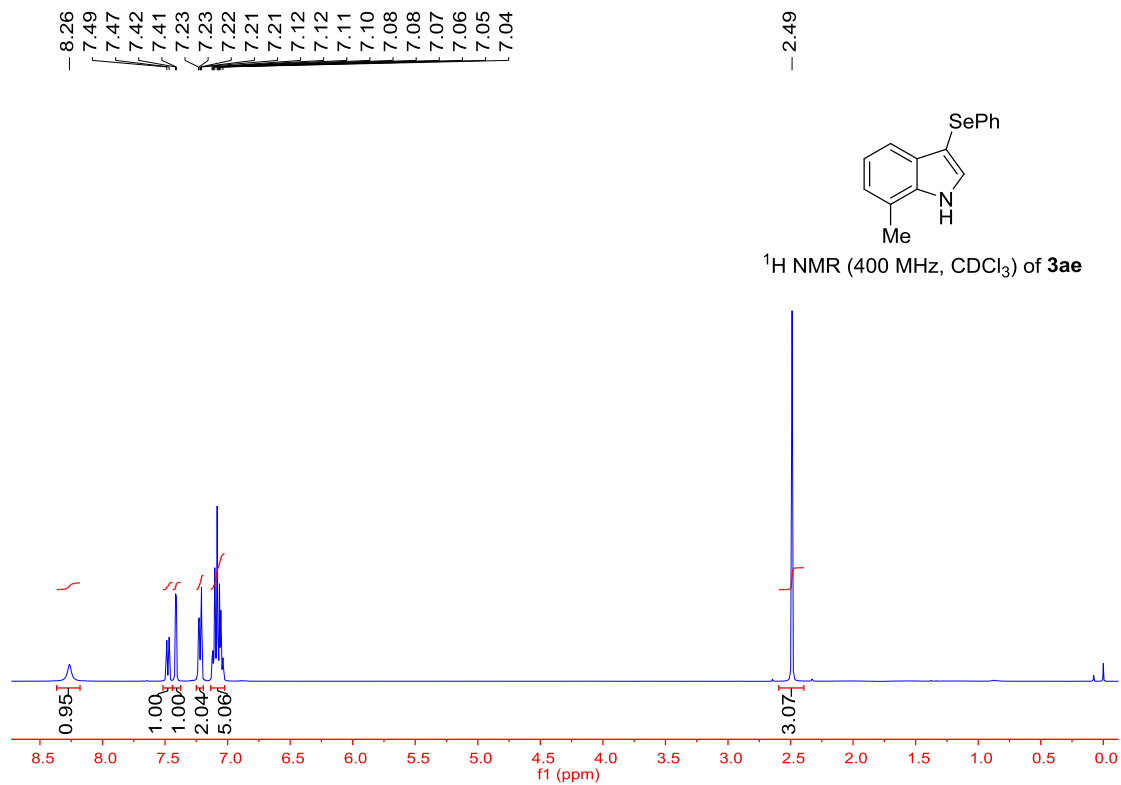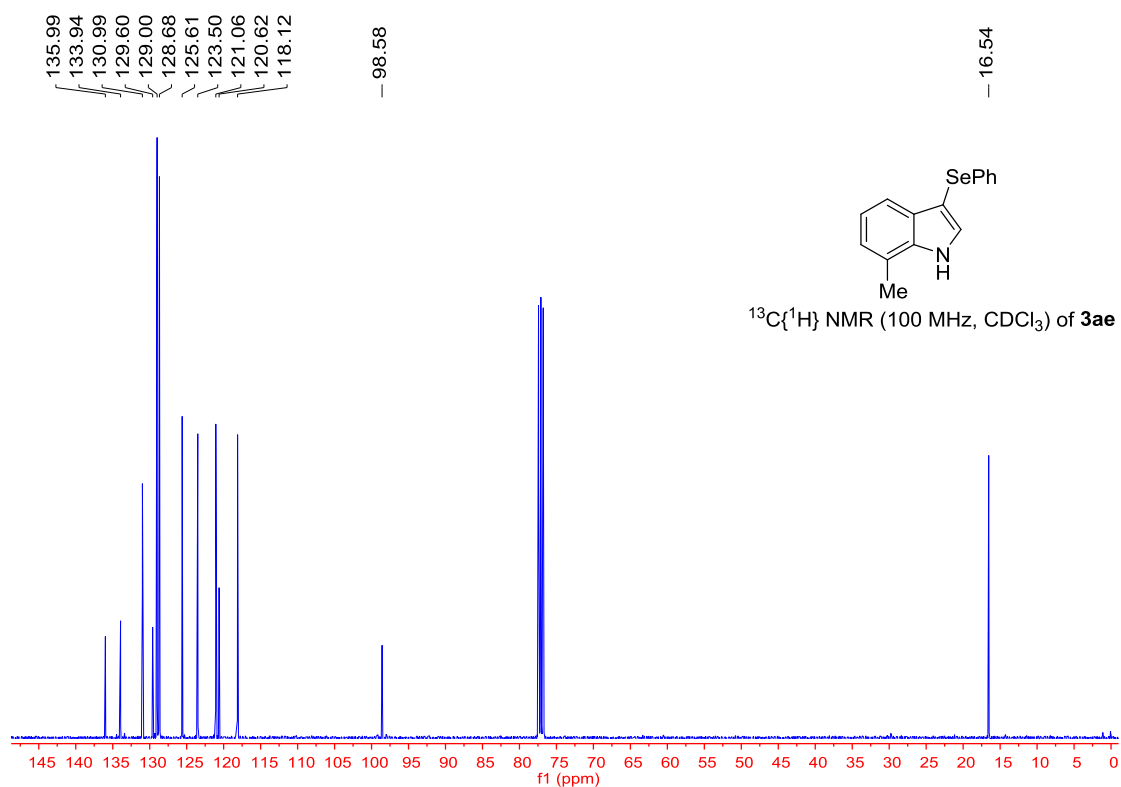

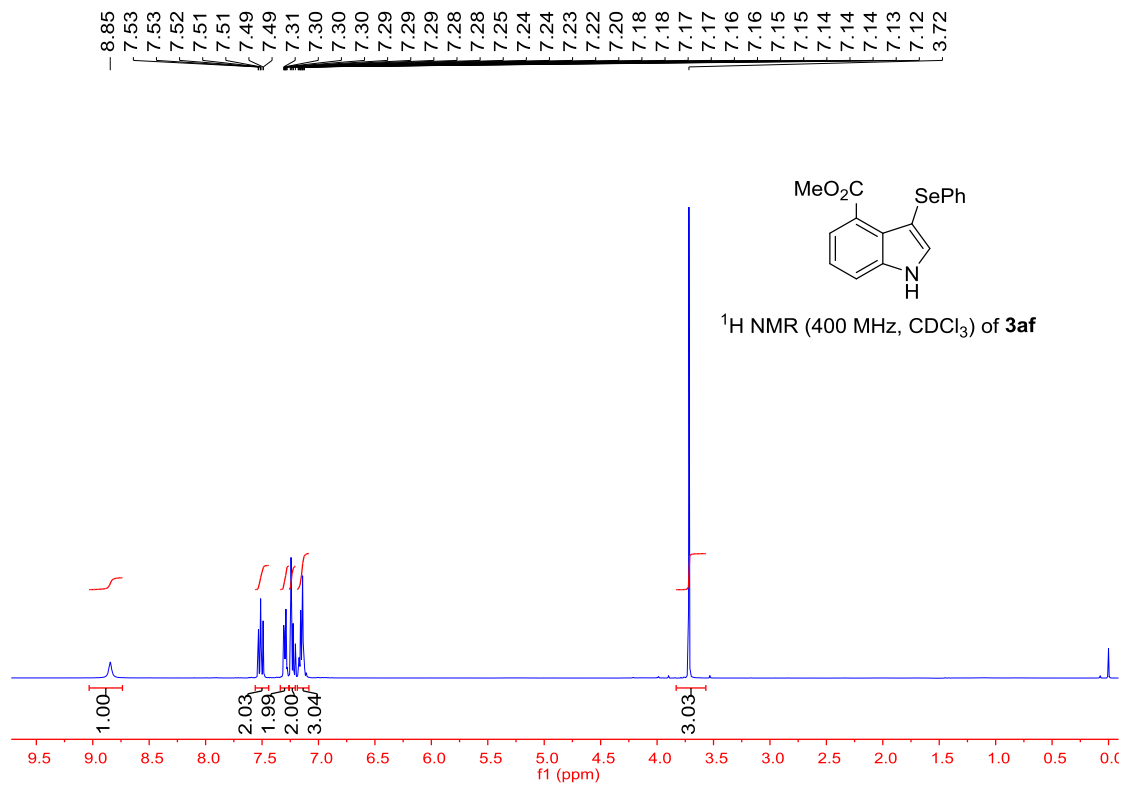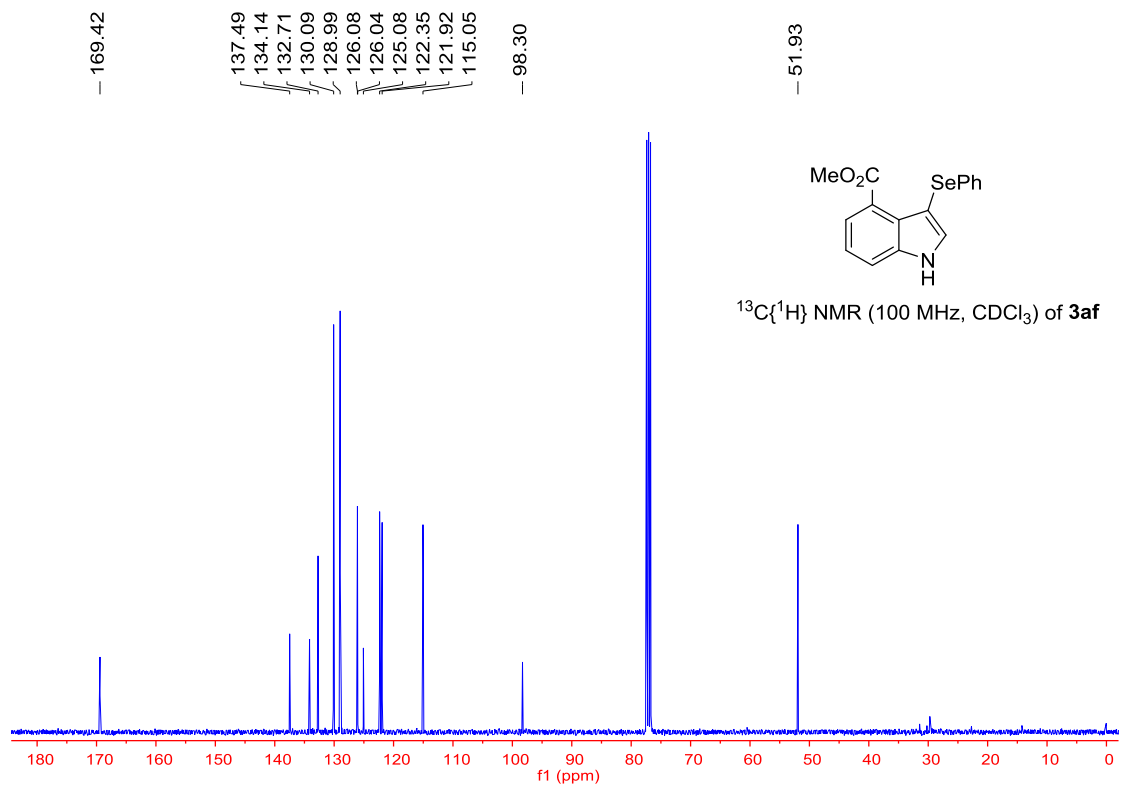

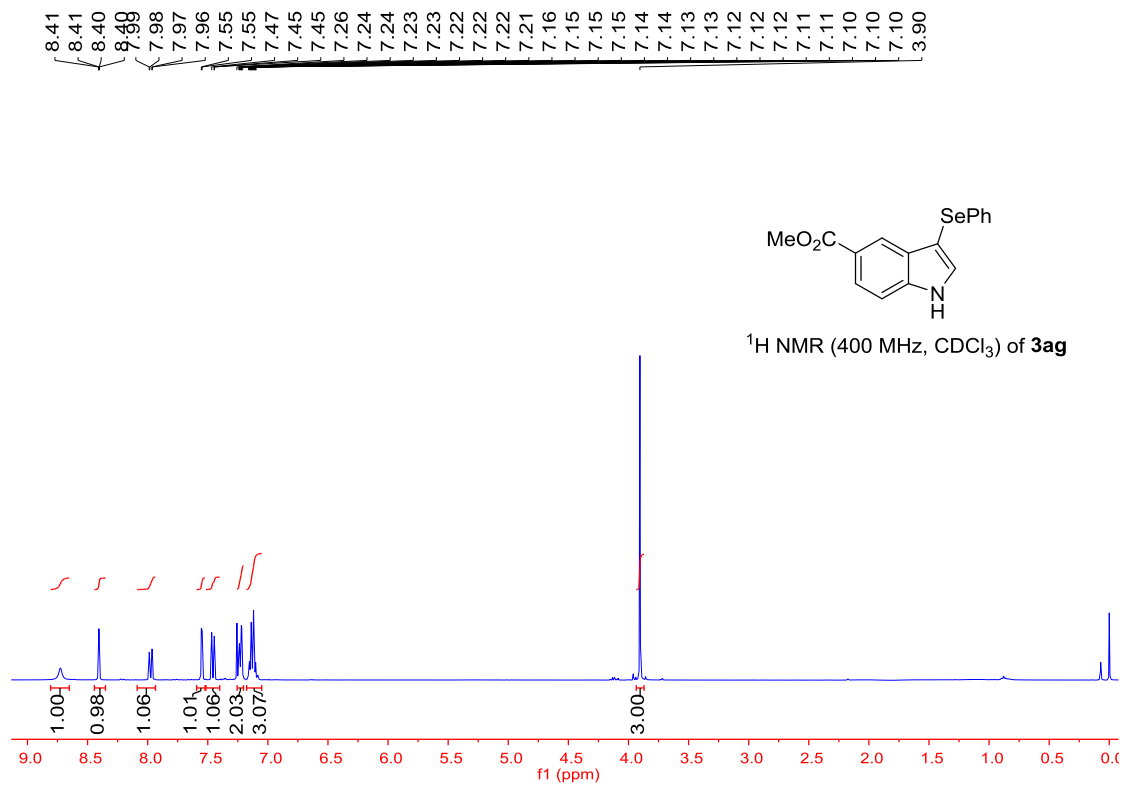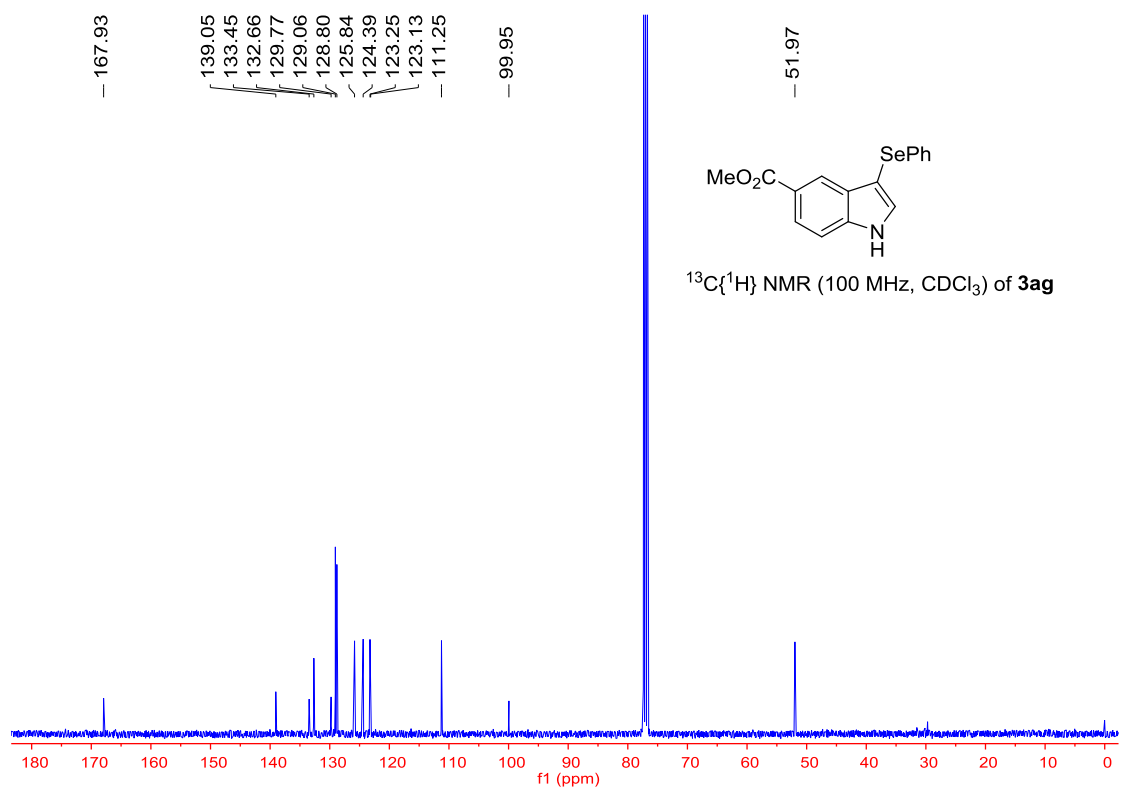

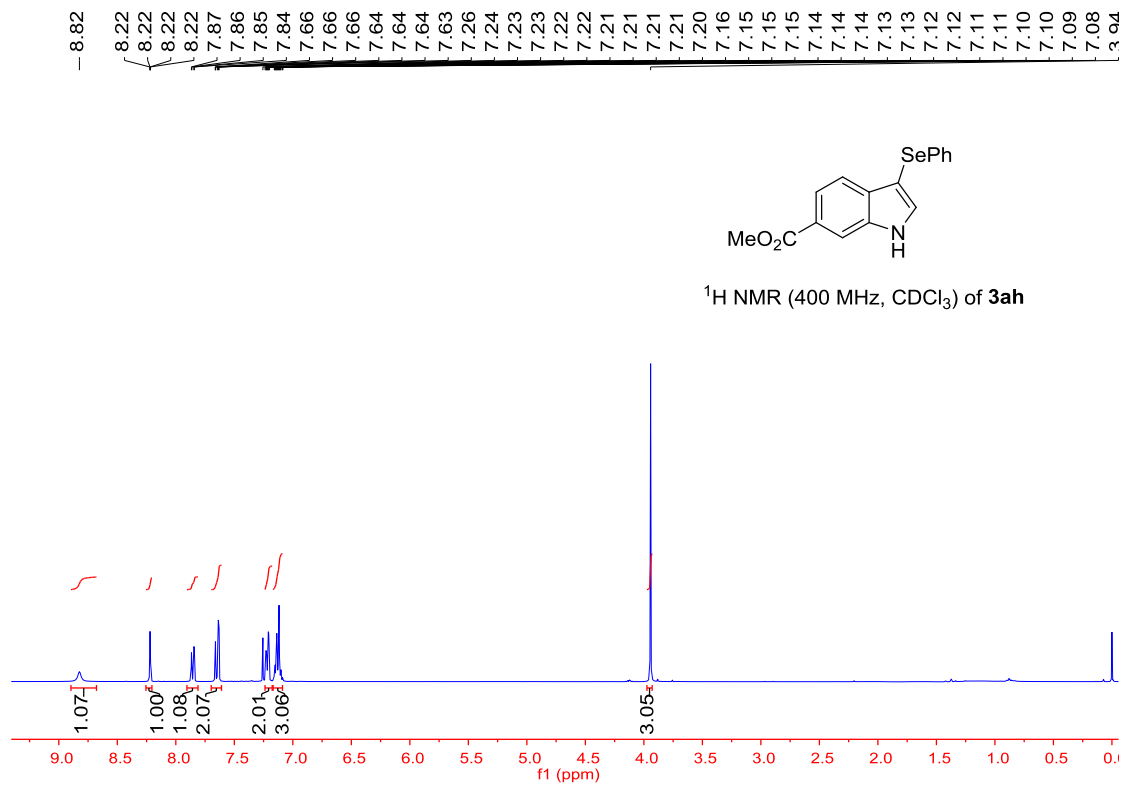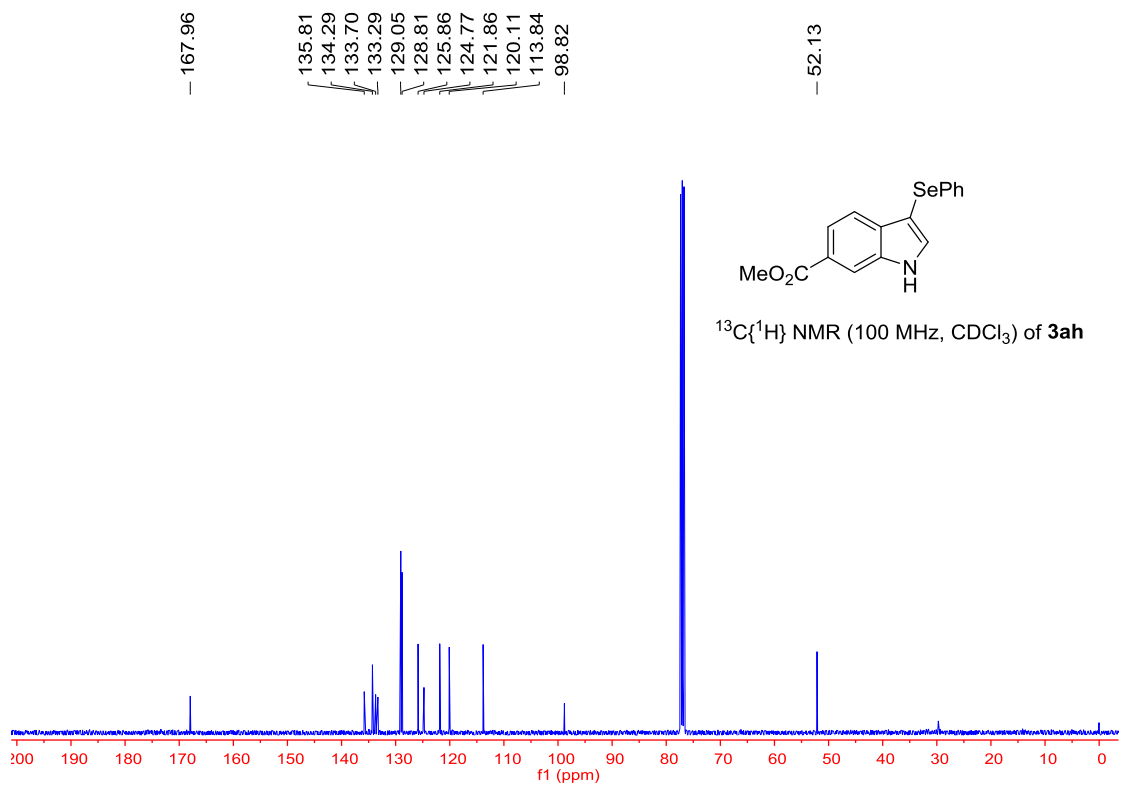

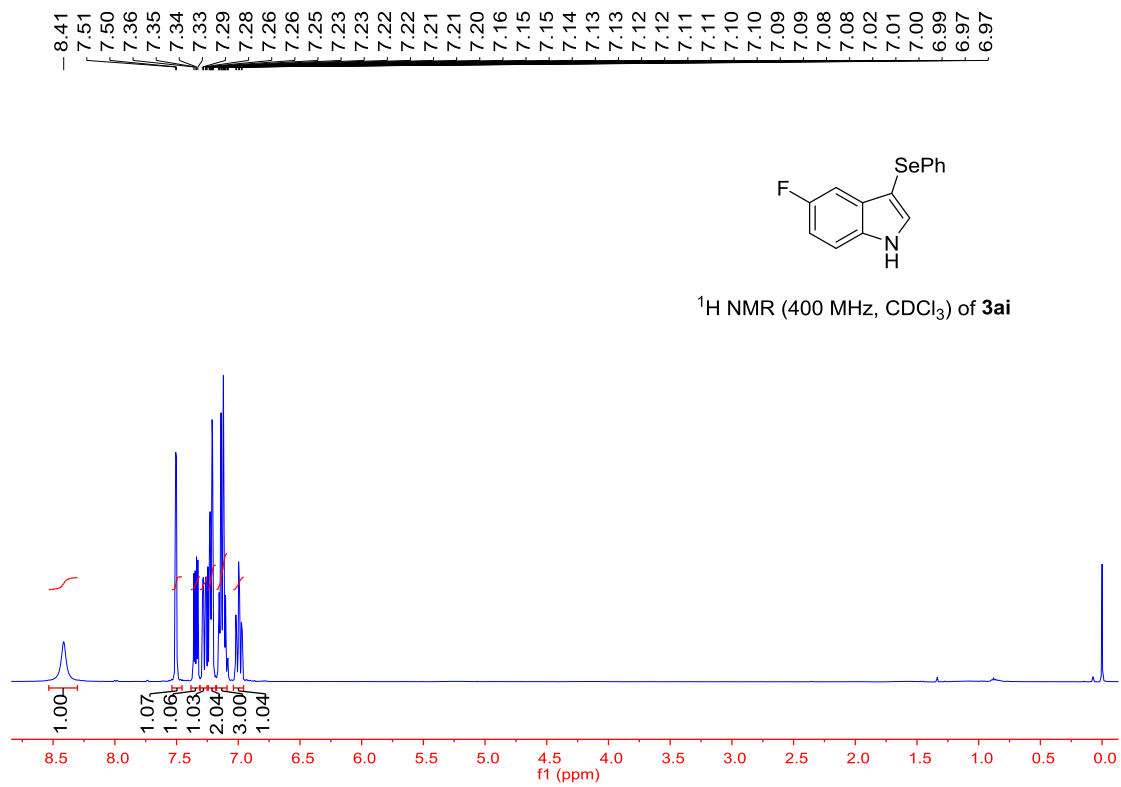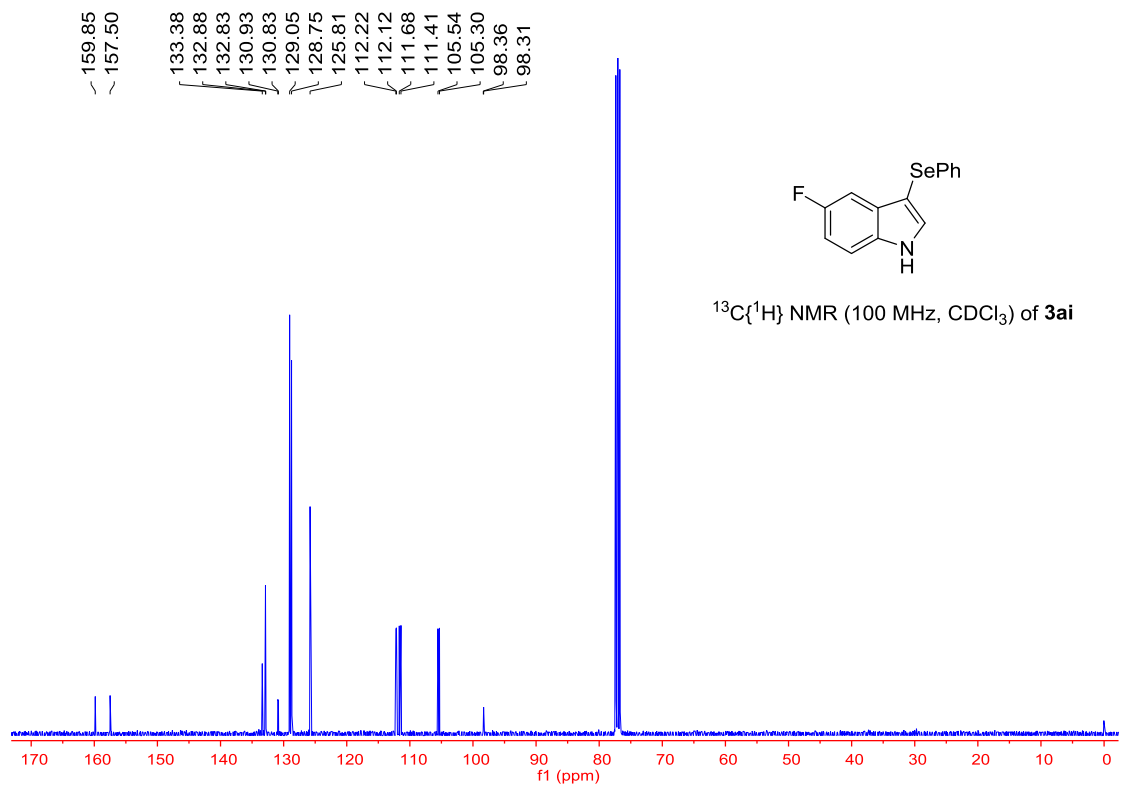

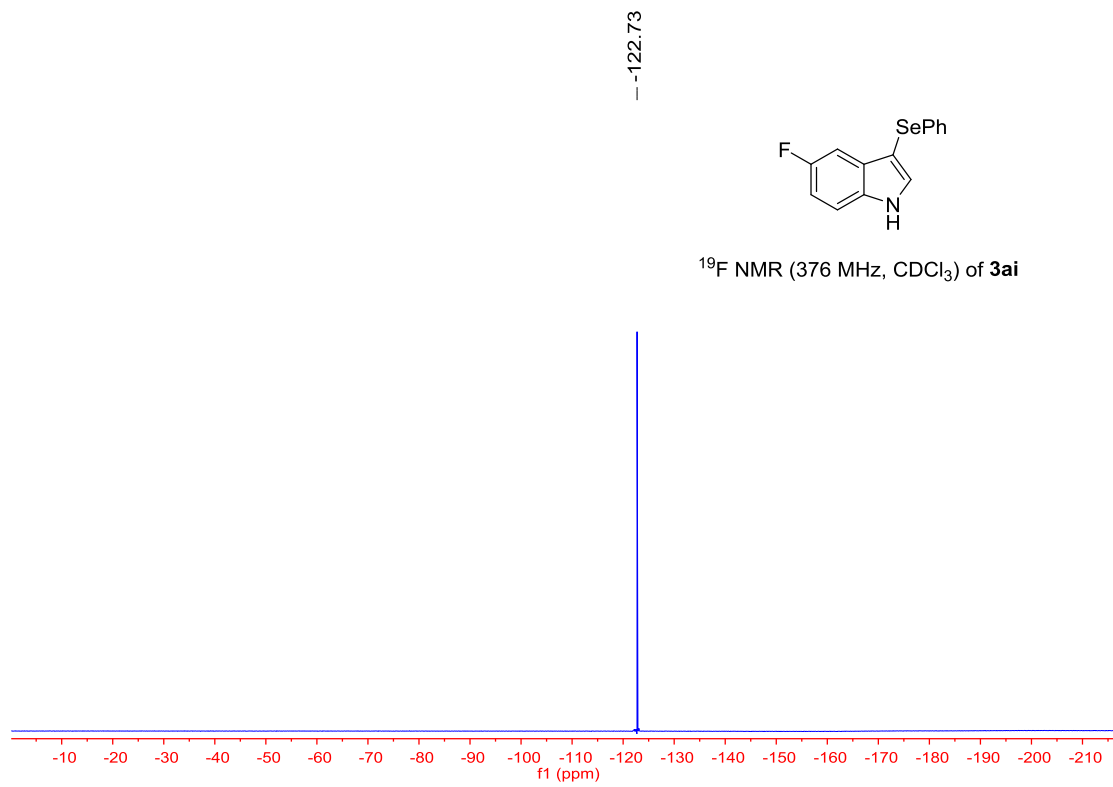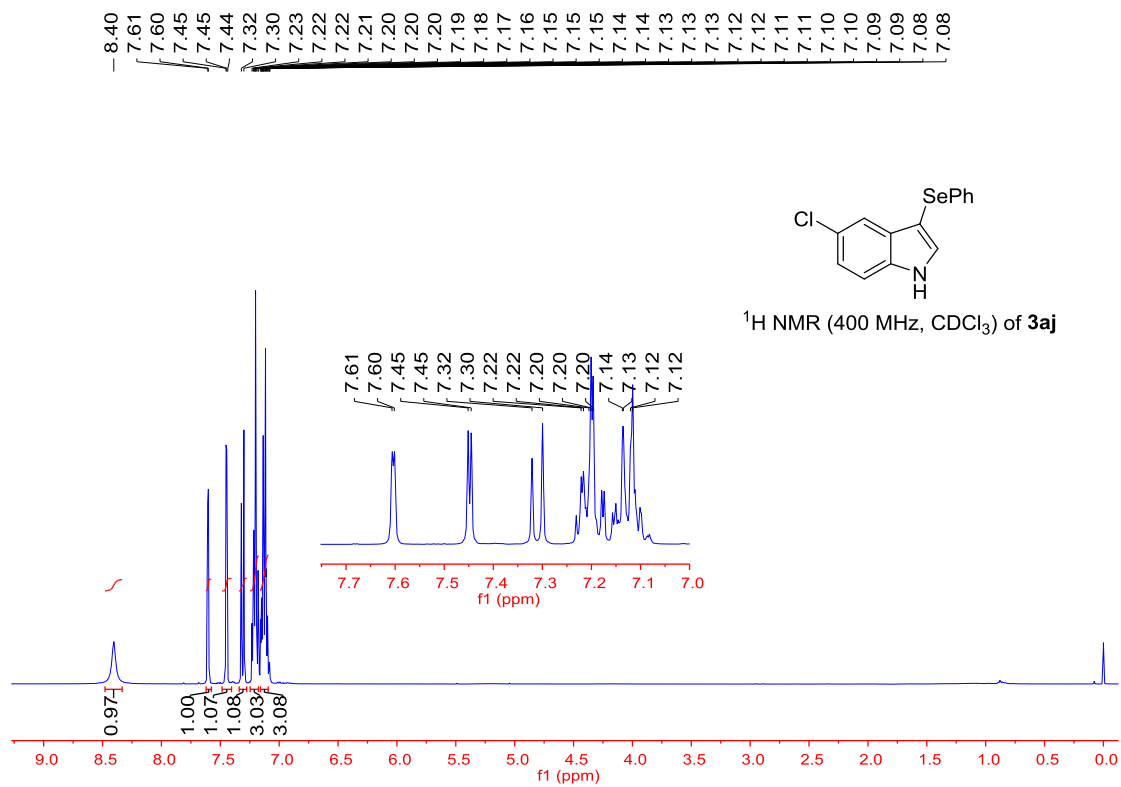

134.77  
133.38  
132.61  
131.29  
129.12  
128.74  
126.84  
125.88  
123.44  
119.88  
- 112.52

- 97.98

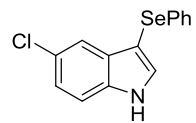

$^{13}\text{C}\{^1\text{H}\}$  NMR (100 MHz,  $\text{CDCl}_3$ ) of **3aj**

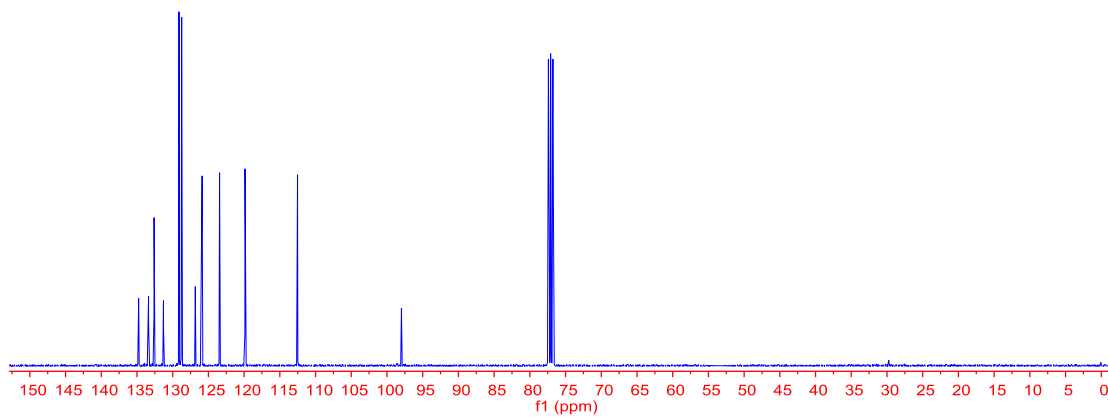

8.45  
7.77  
7.77  
7.46  
7.45  
7.34  
7.34  
7.32  
7.32  
7.30  
7.28  
7.24  
7.22  
7.22  
7.21  
7.20  
7.20  
7.20  
7.19  
7.16  
7.16  
7.15  
7.14  
7.14  
7.13  
7.13  
7.12  
7.12  
7.11  
7.11  
7.11

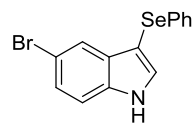

$^1\text{H}$  NMR (400 MHz,  $\text{CDCl}_3$ ) of **3ak**

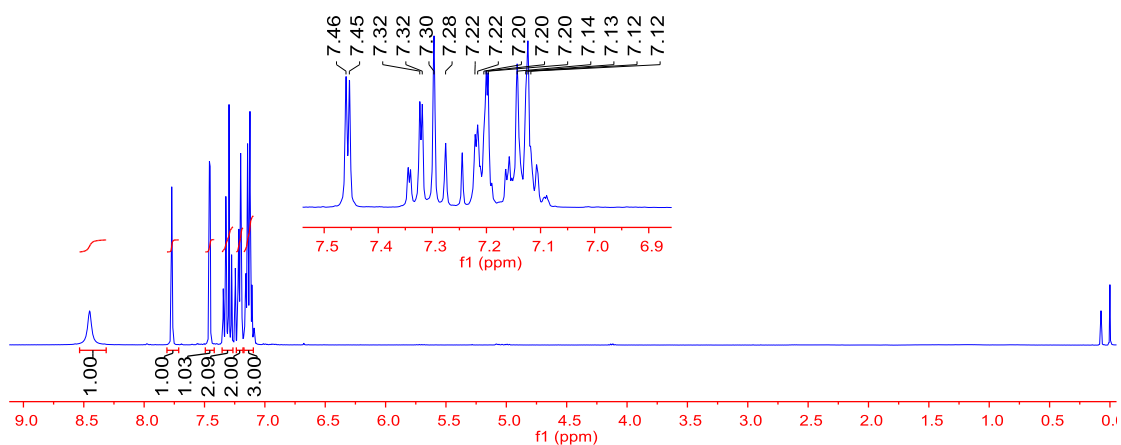

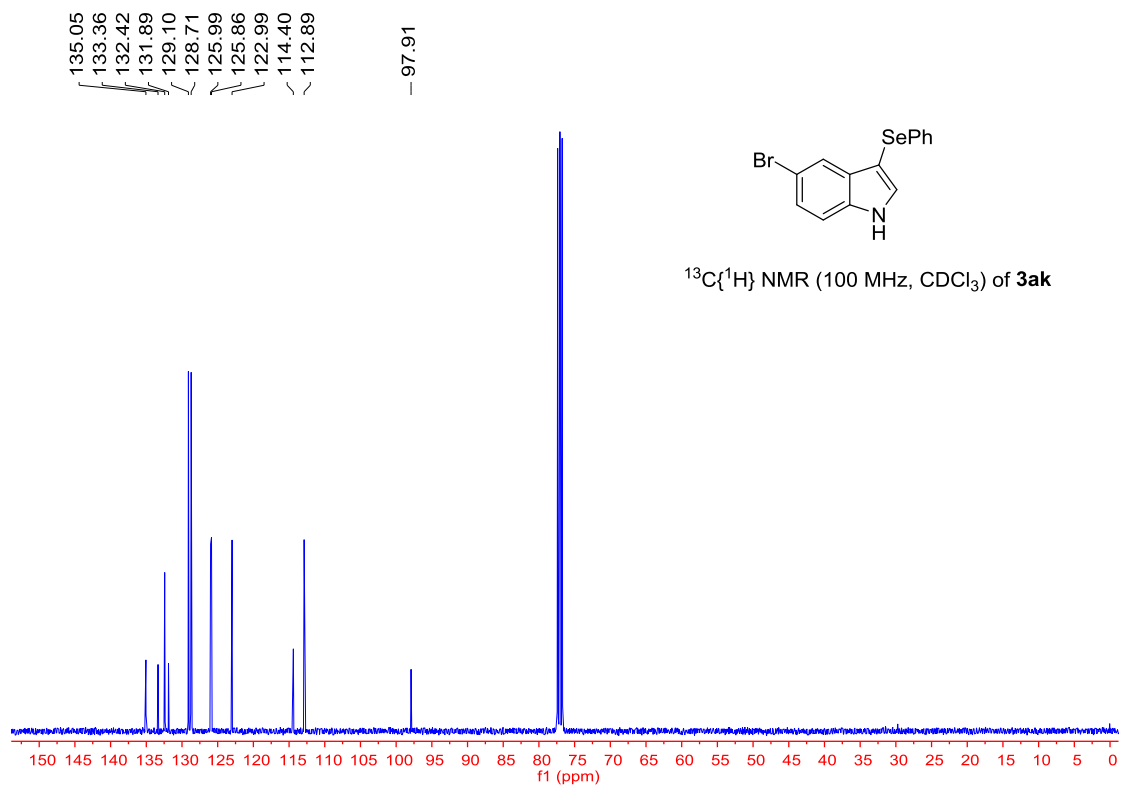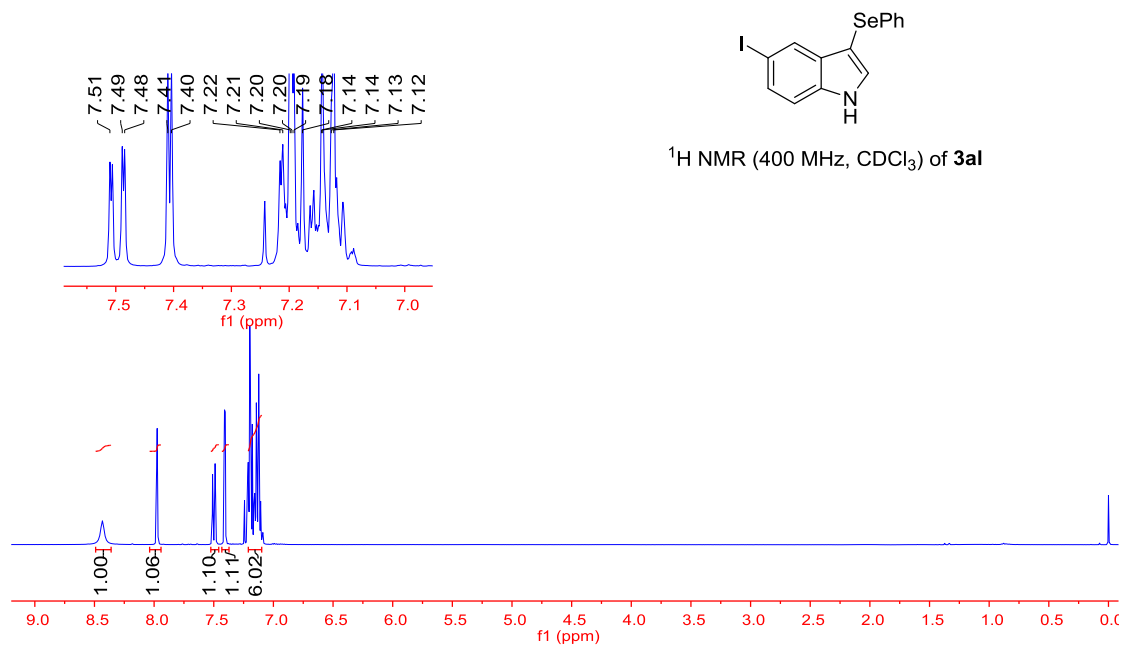



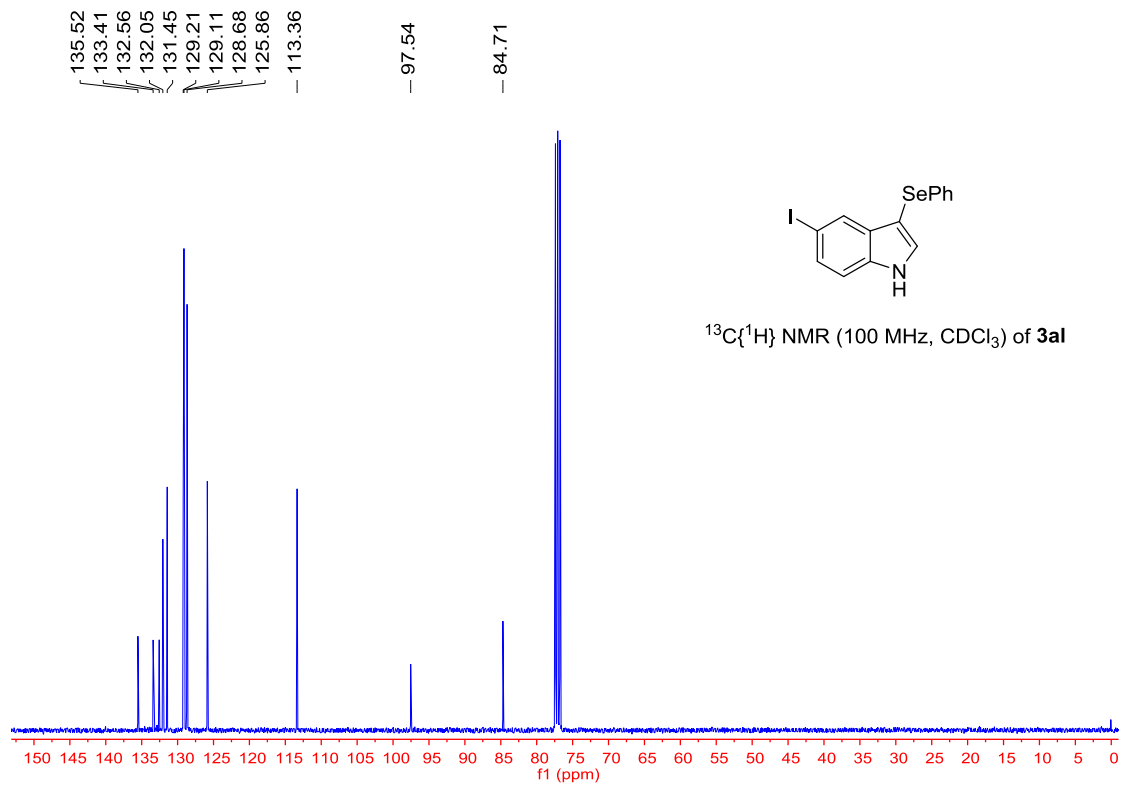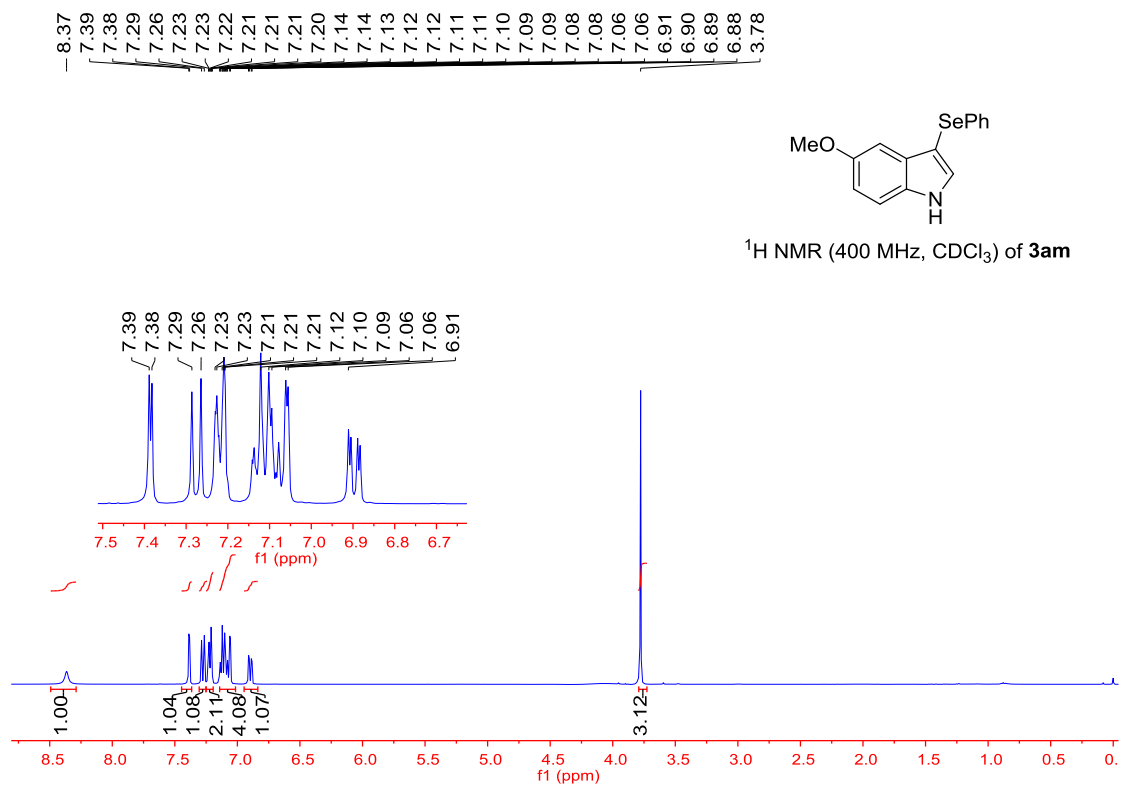

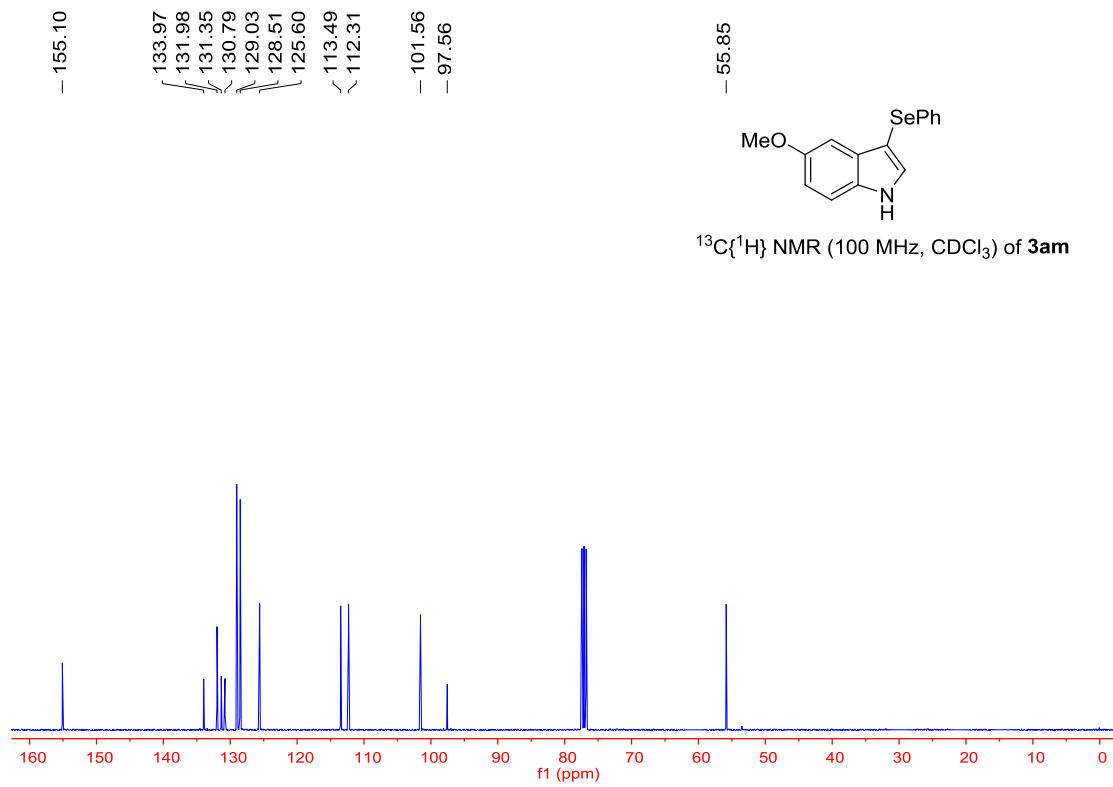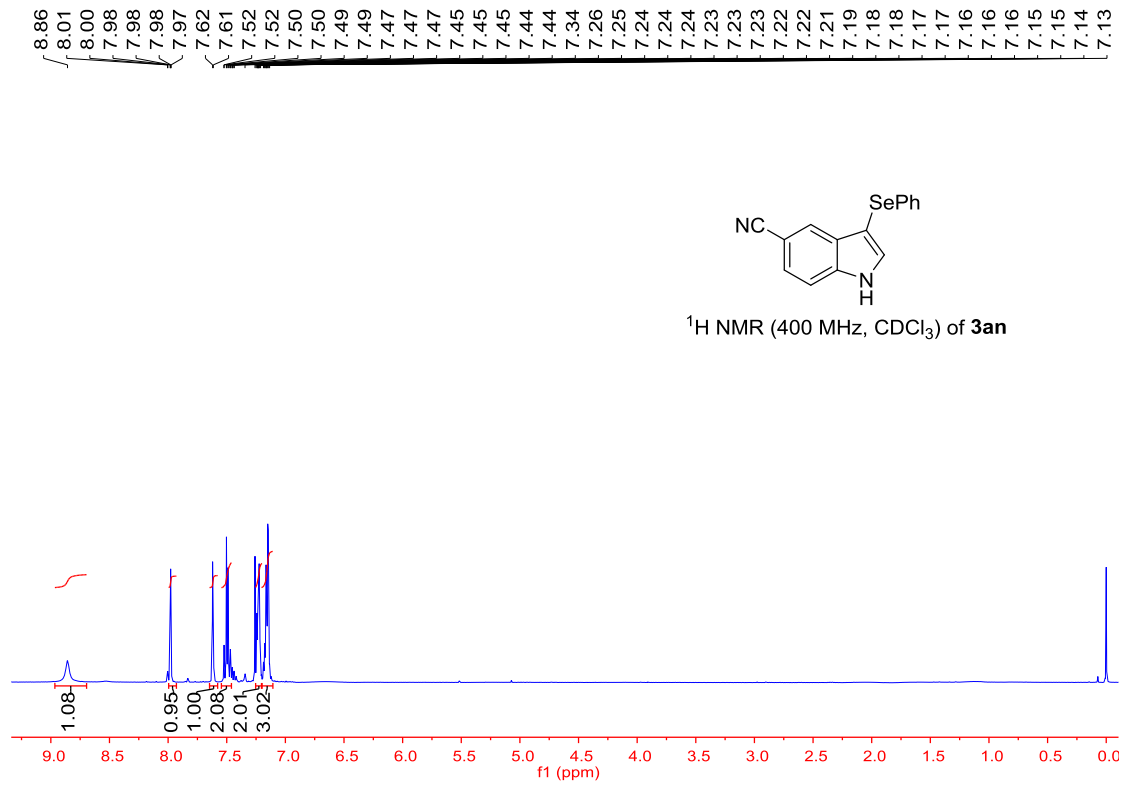

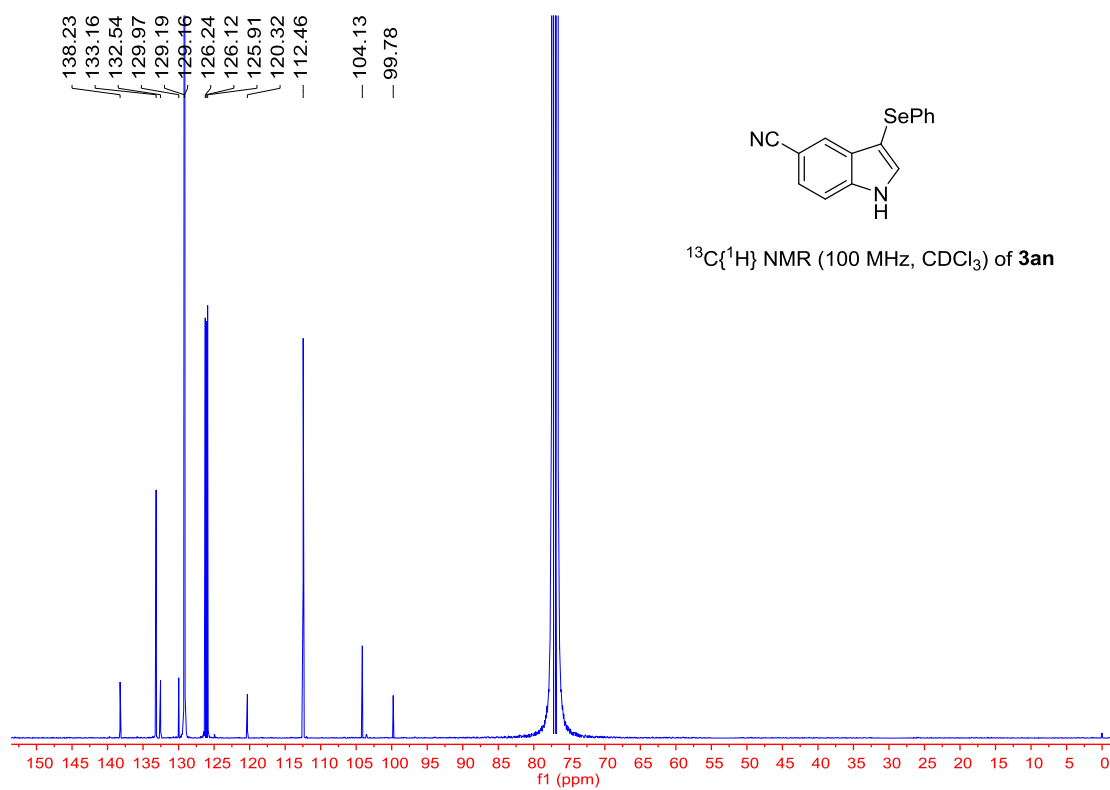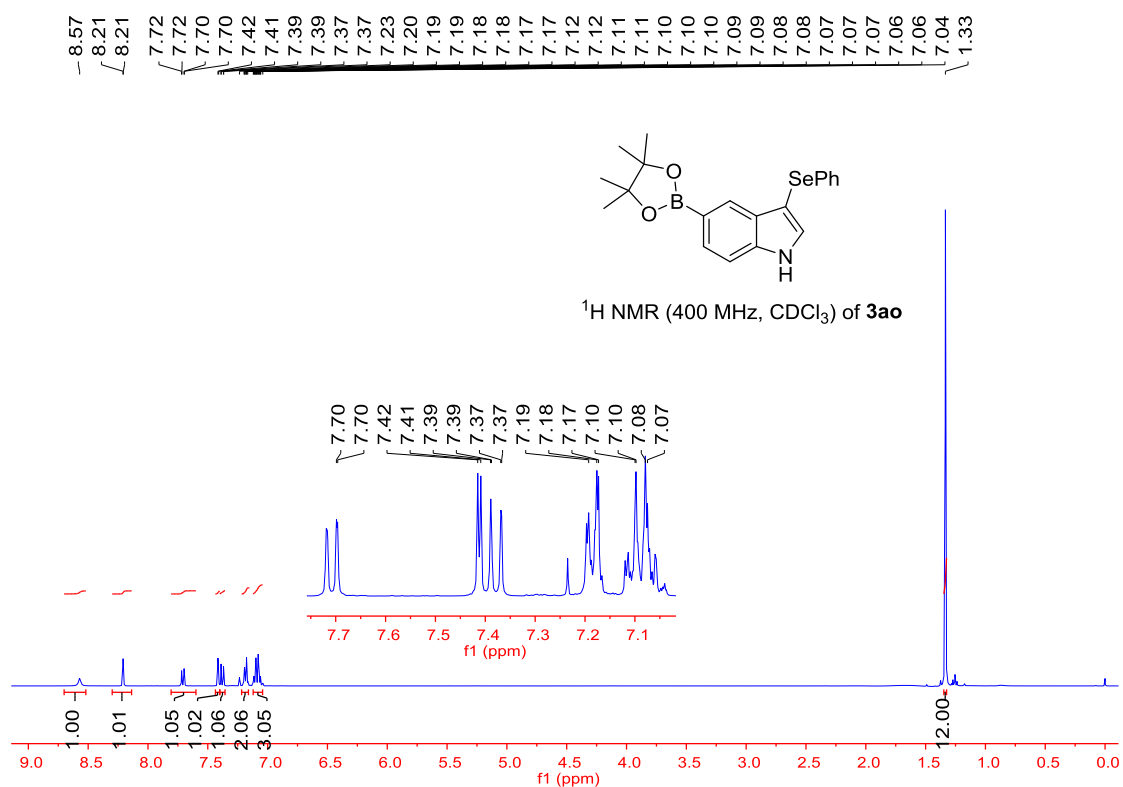

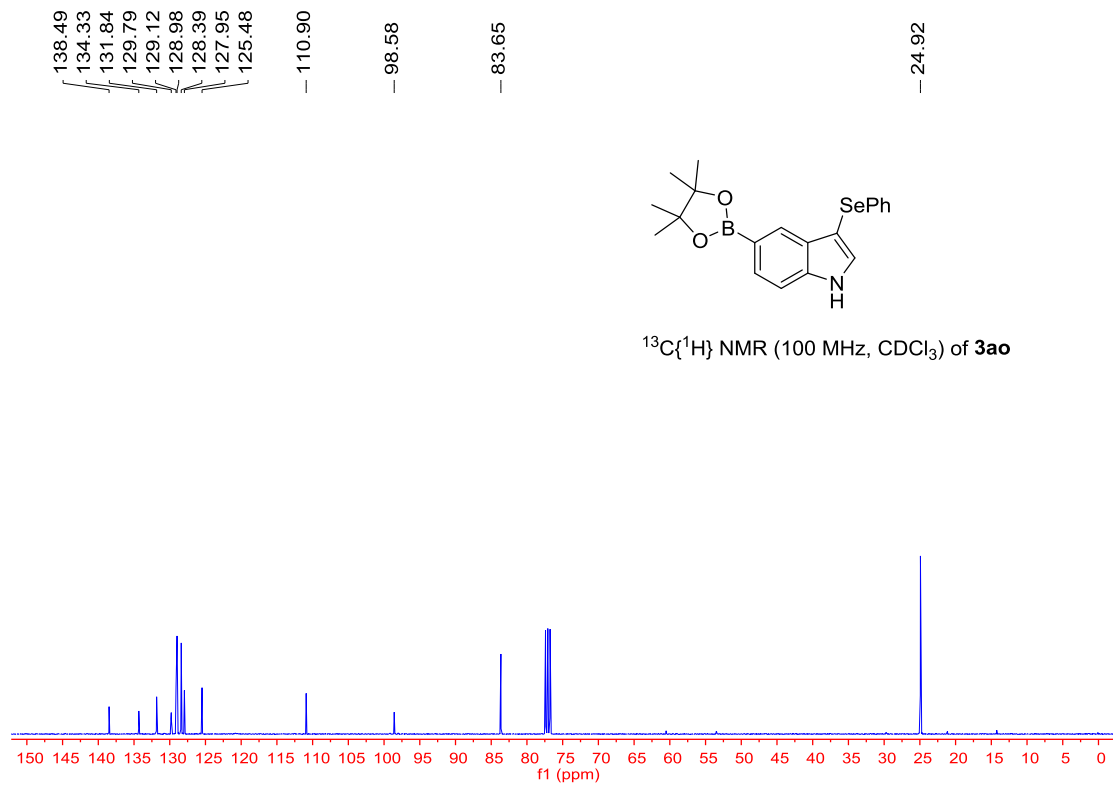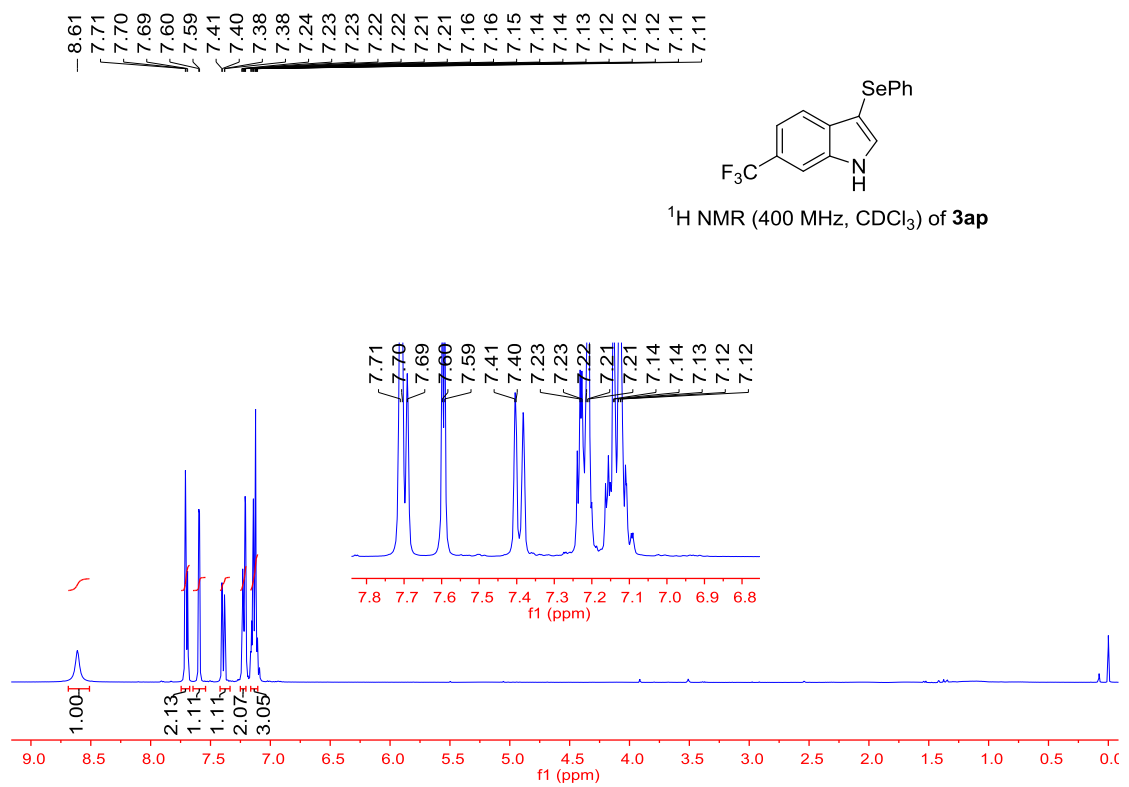

135.33  
133.62  
133.14  
132.39  
129.12  
128.89  
126.35  
125.97  
125.68  
125.36  
125.05  
124.73  
123.65  
120.94  
117.64  
117.60  
109.13  
109.09  
109.05  
109.00  
98.88

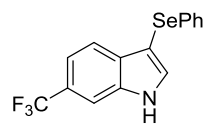

$^{13}\text{C}\{^1\text{H}\}$  NMR (100 MHz,  $\text{CDCl}_3$ ) of **3ap**

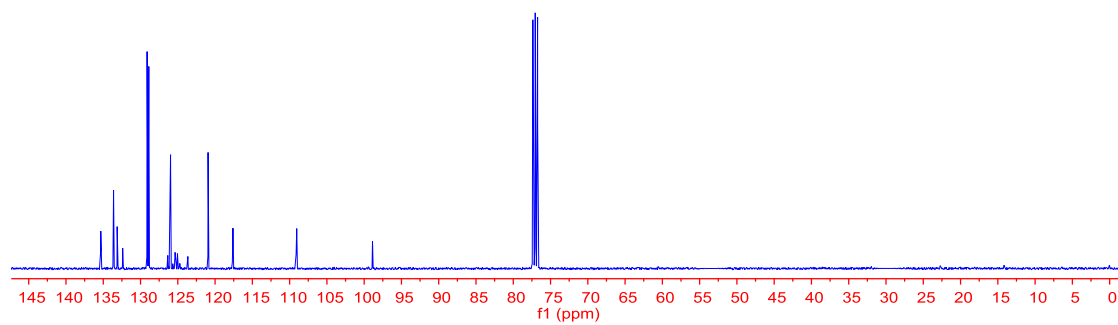

-60.63

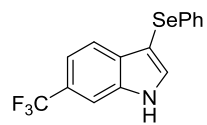

$^{19}\text{F}$  NMR (376 MHz,  $\text{CDCl}_3$ ) of **3ap**

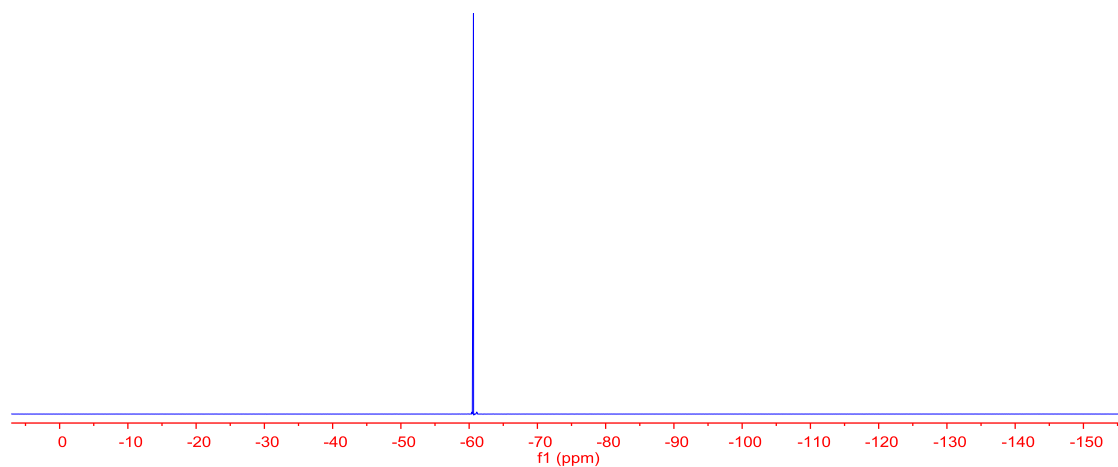

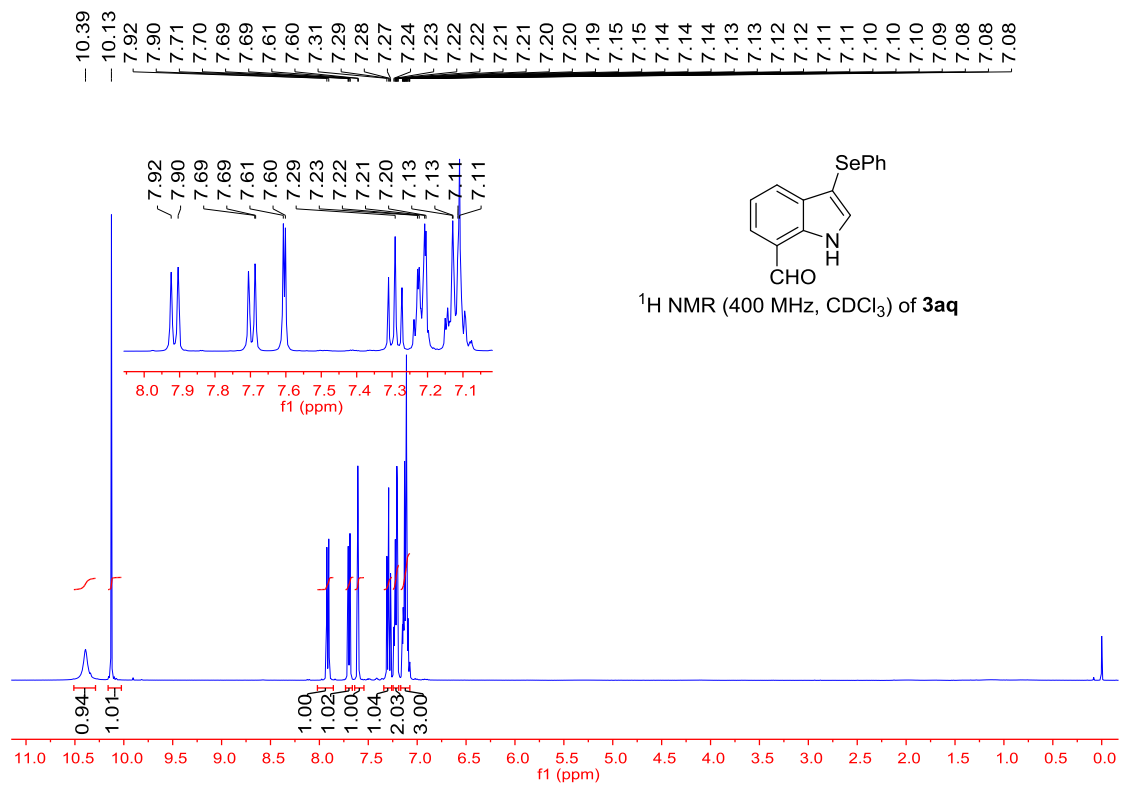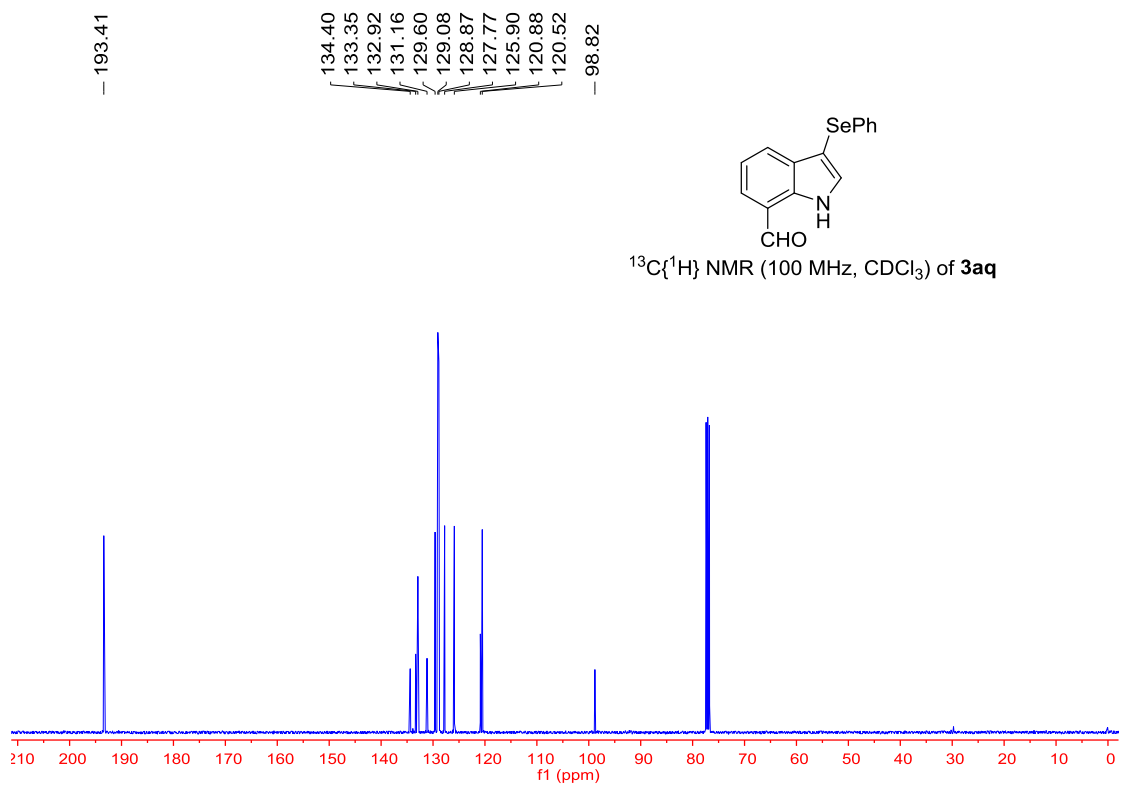

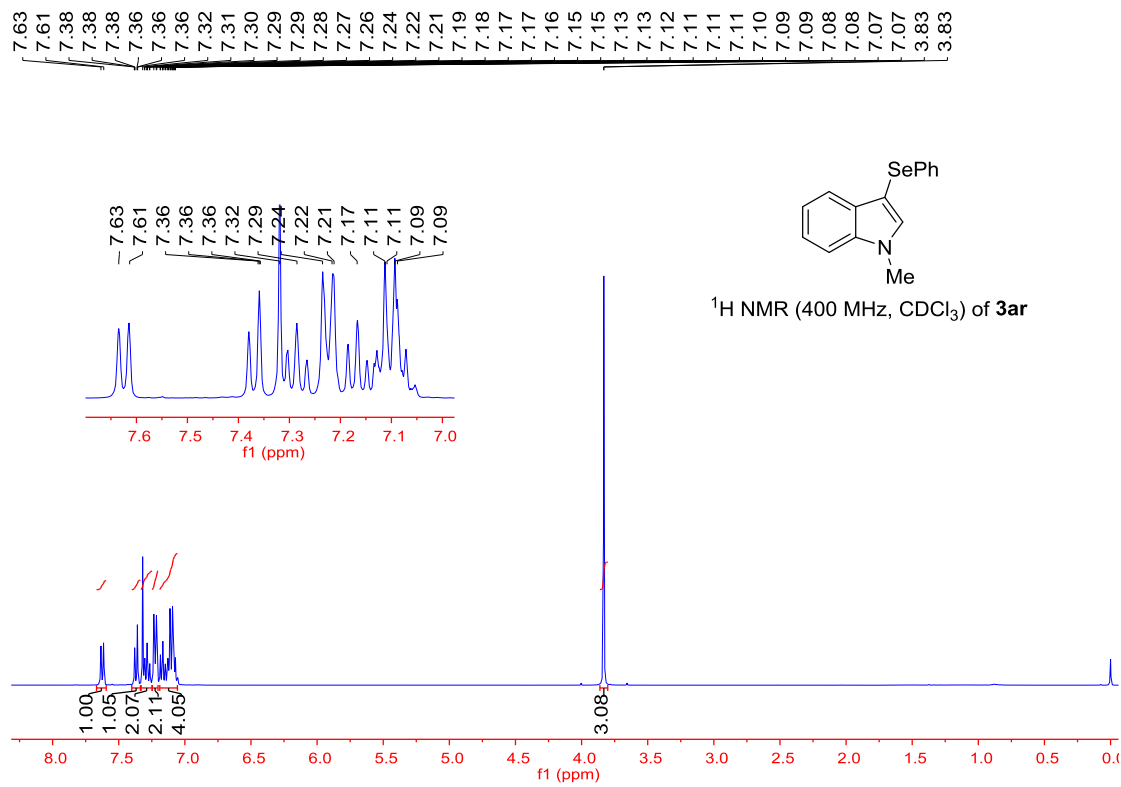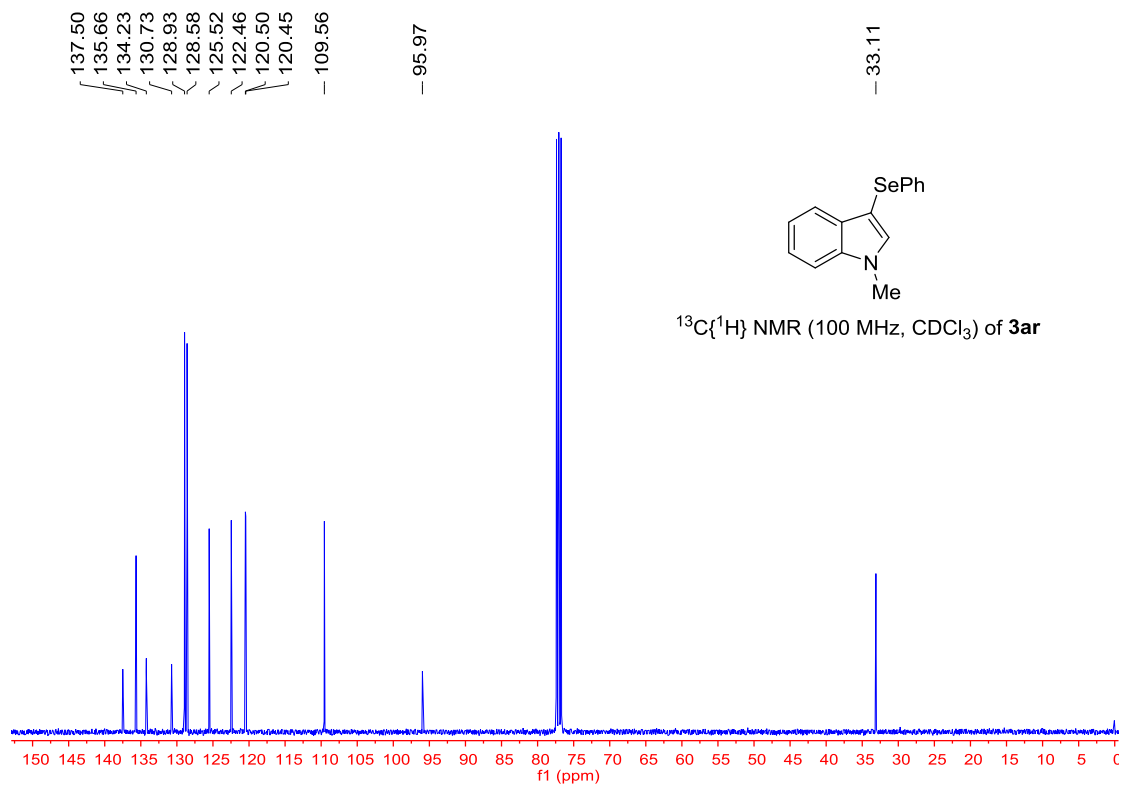

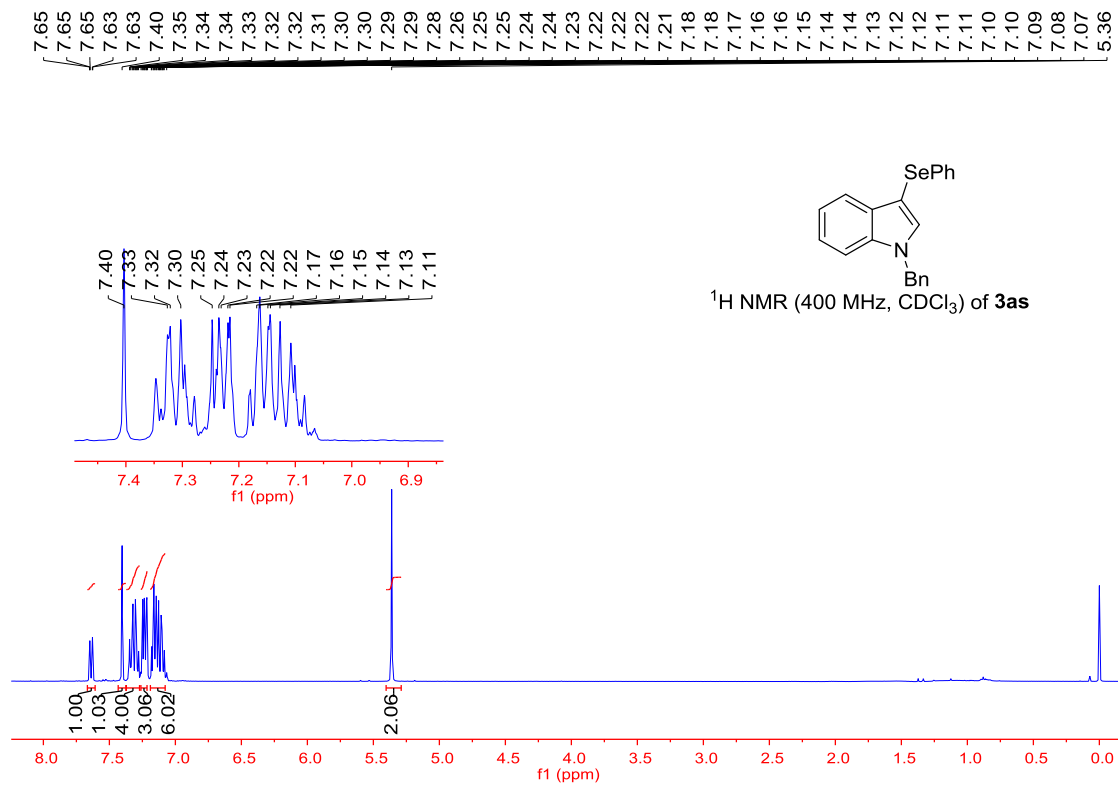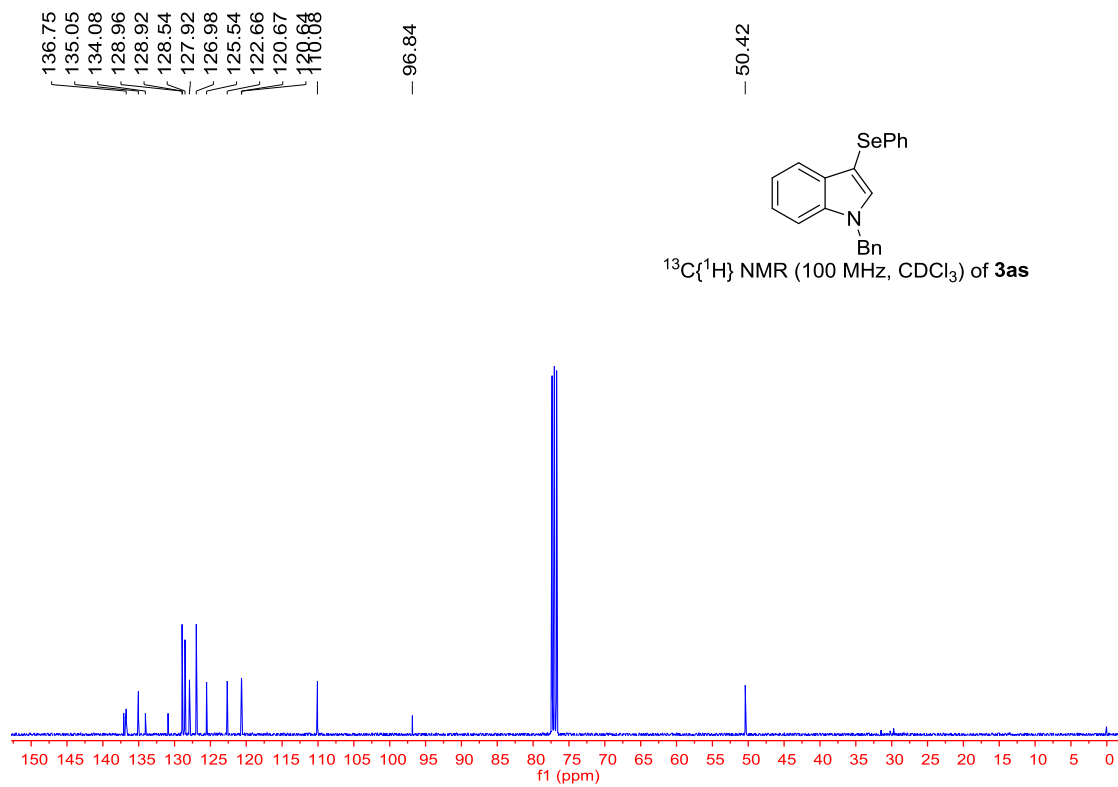



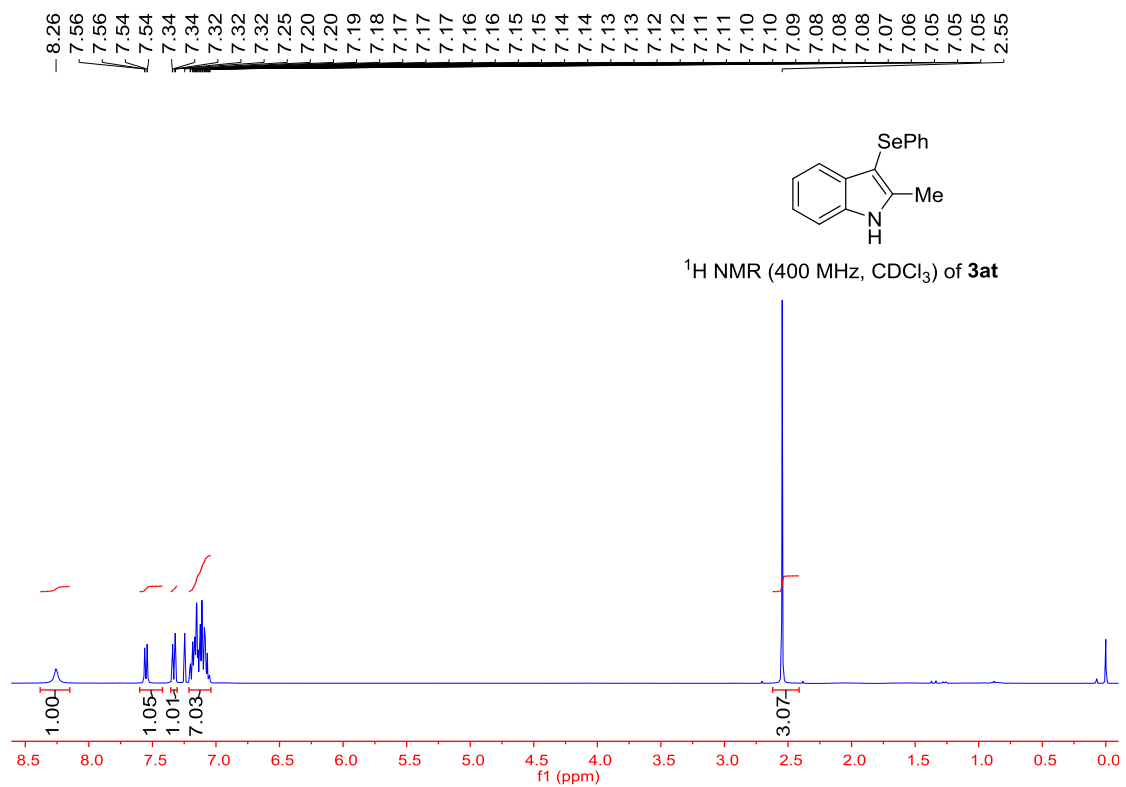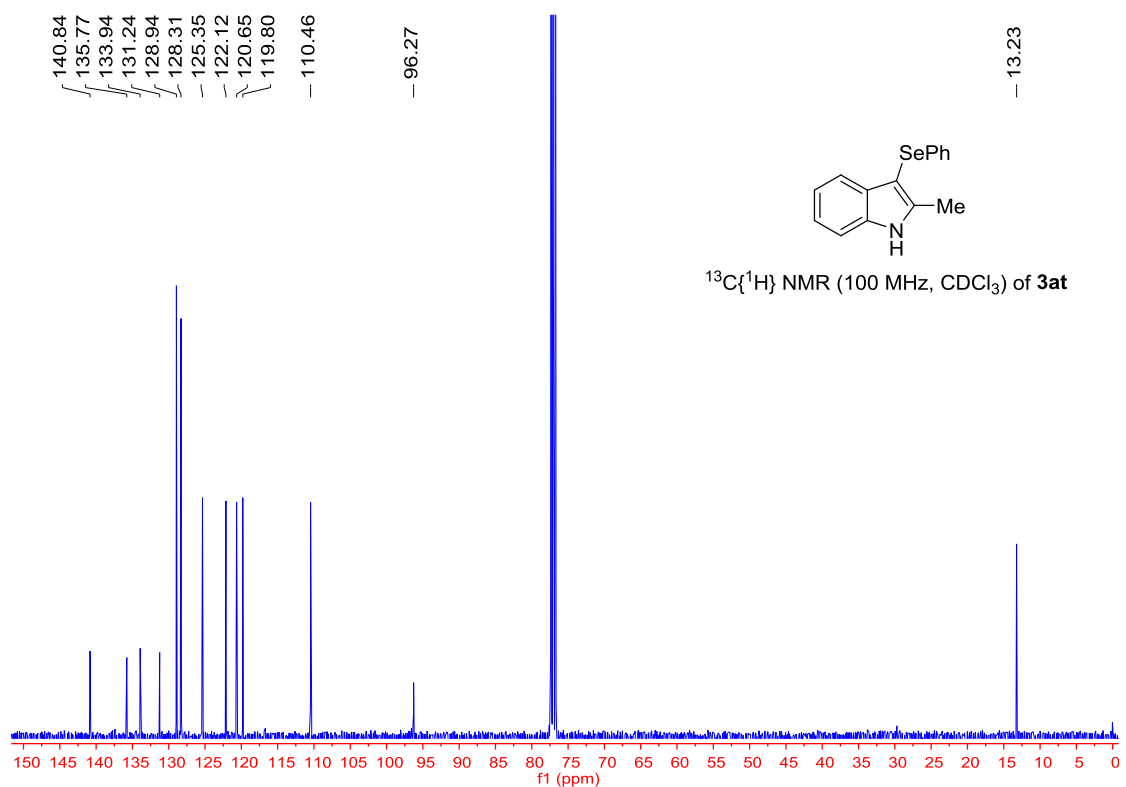

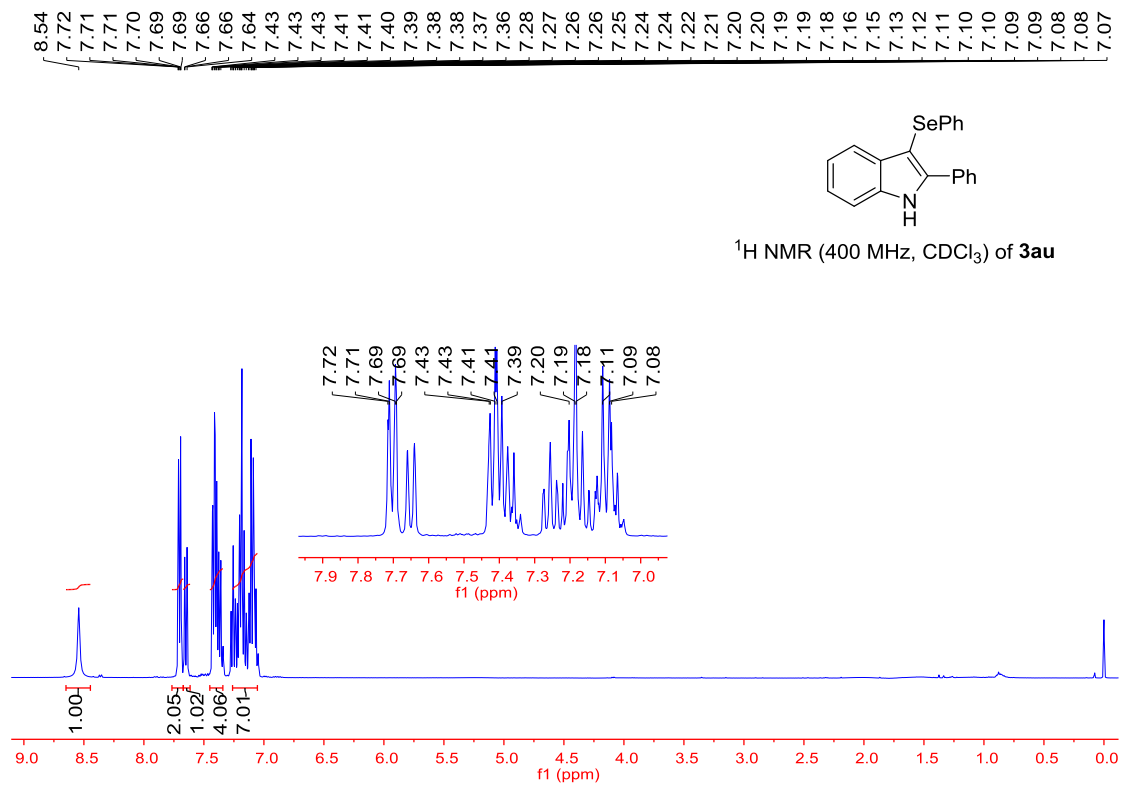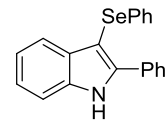

<sup>1</sup>H NMR (400 MHz, CDCl<sub>3</sub>) of **3au**

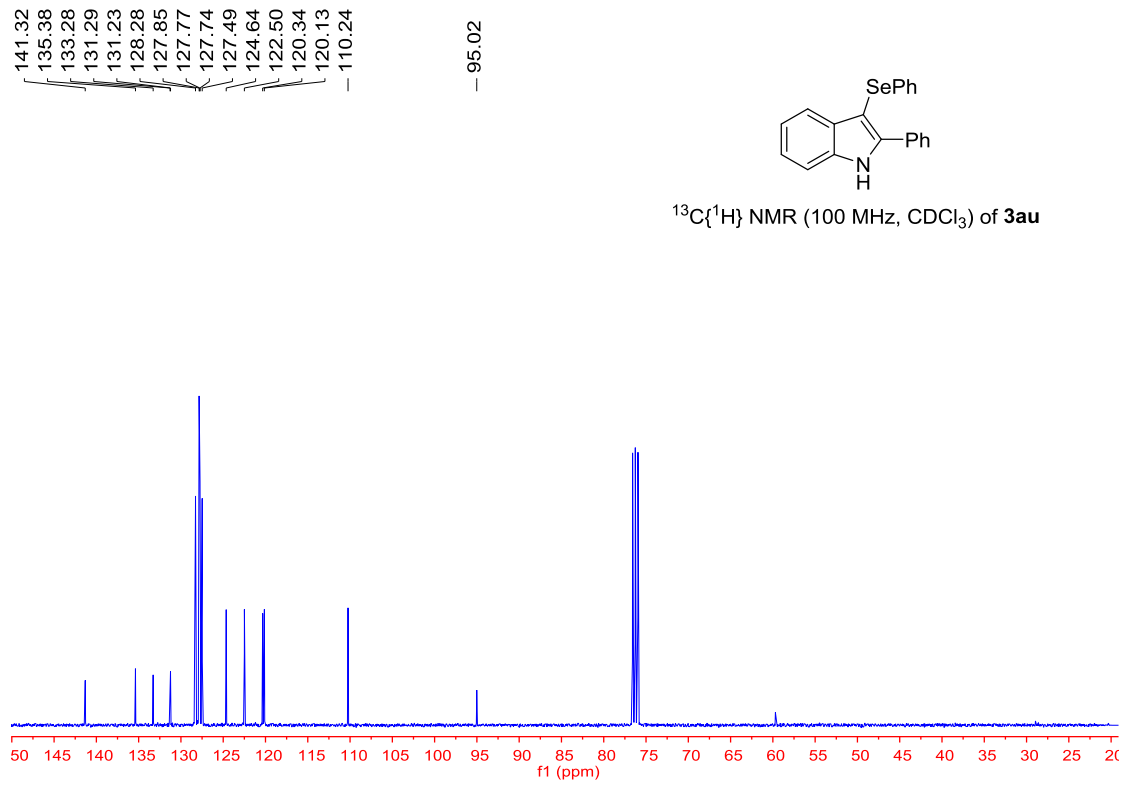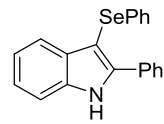

<sup>13</sup>C{<sup>1</sup>H} NMR (100 MHz, CDCl<sub>3</sub>) of **3au**

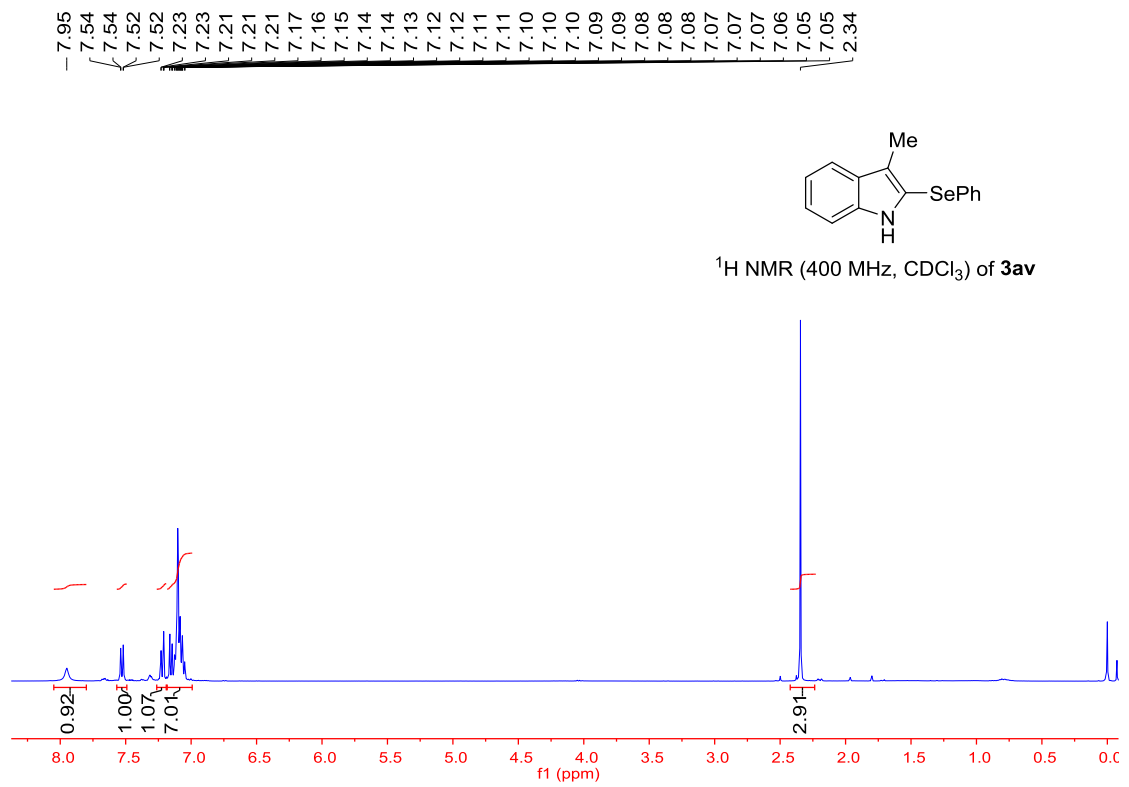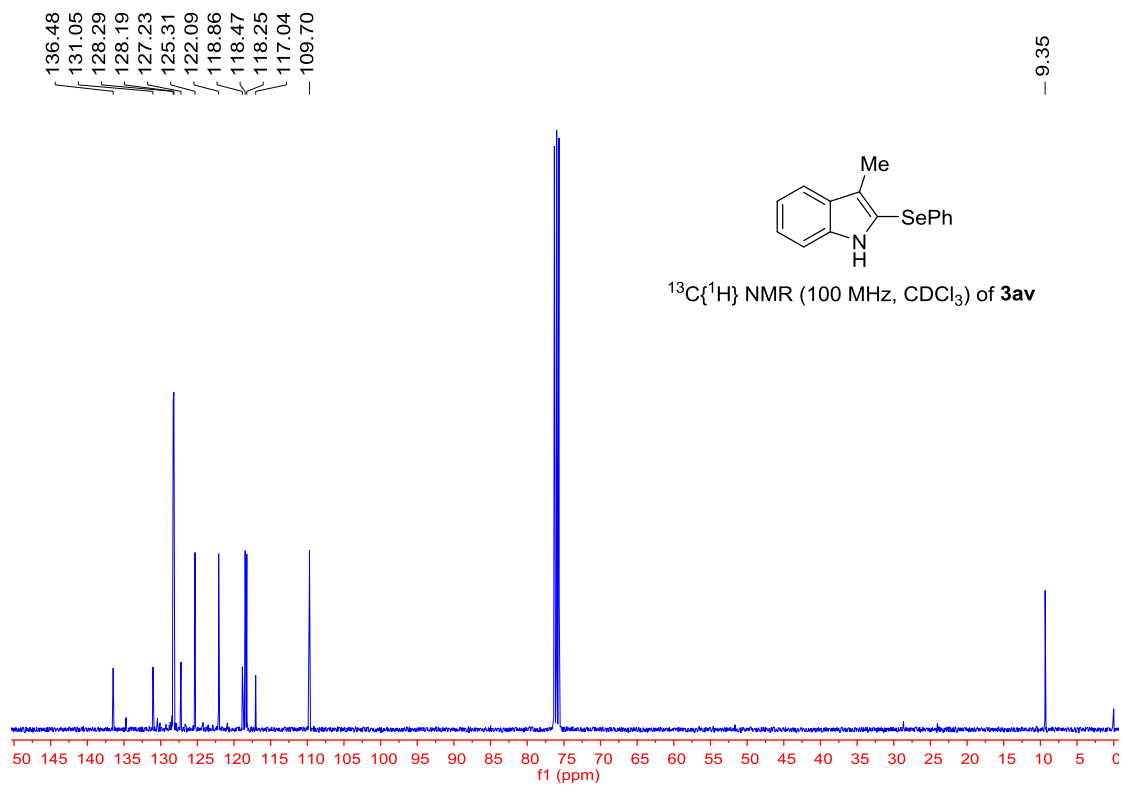

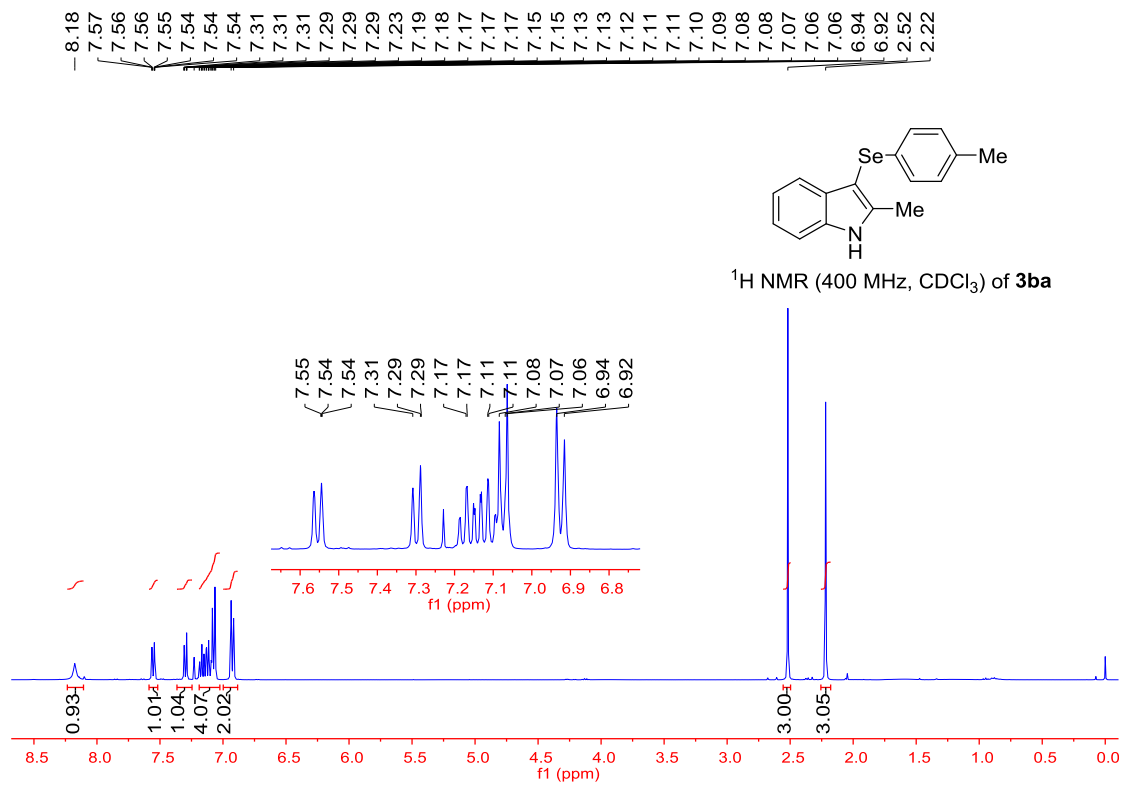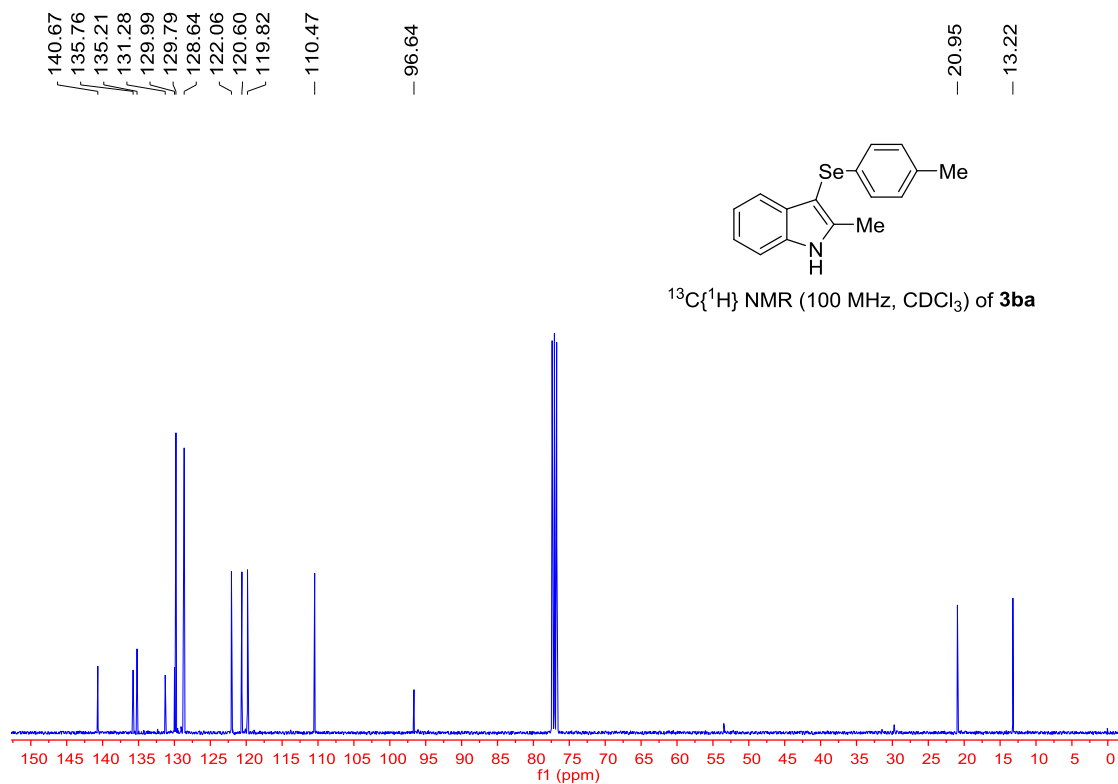

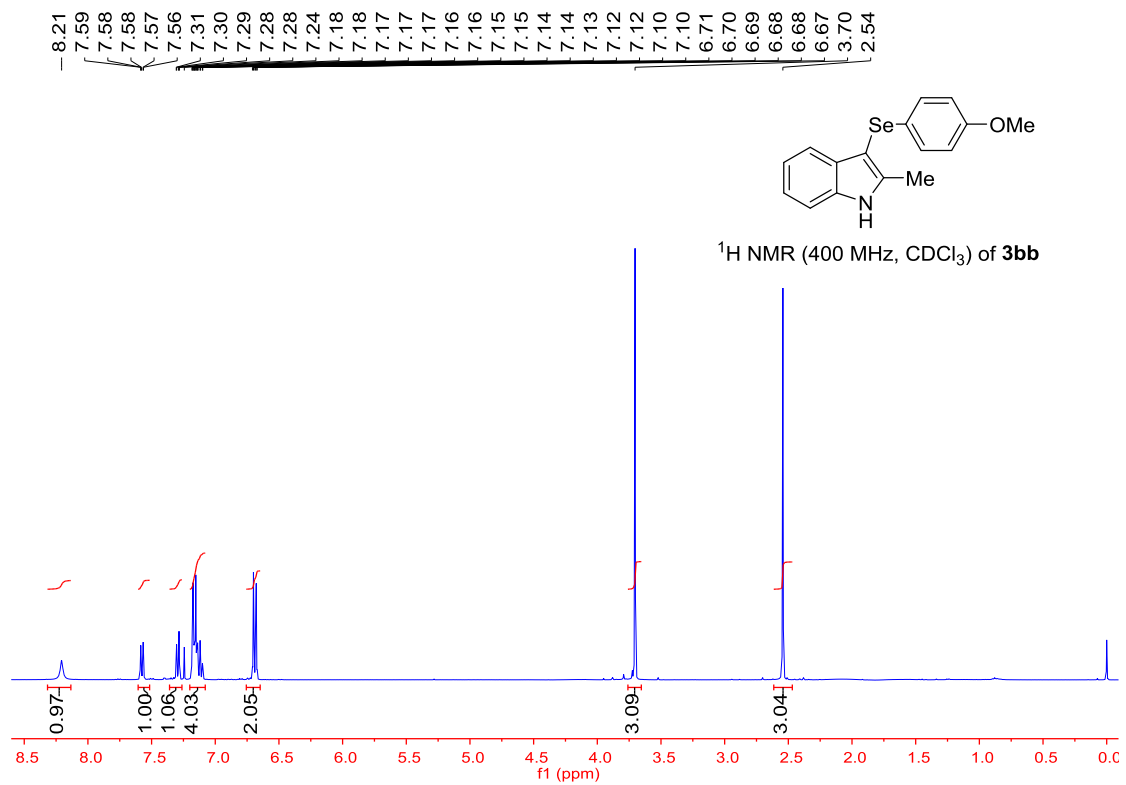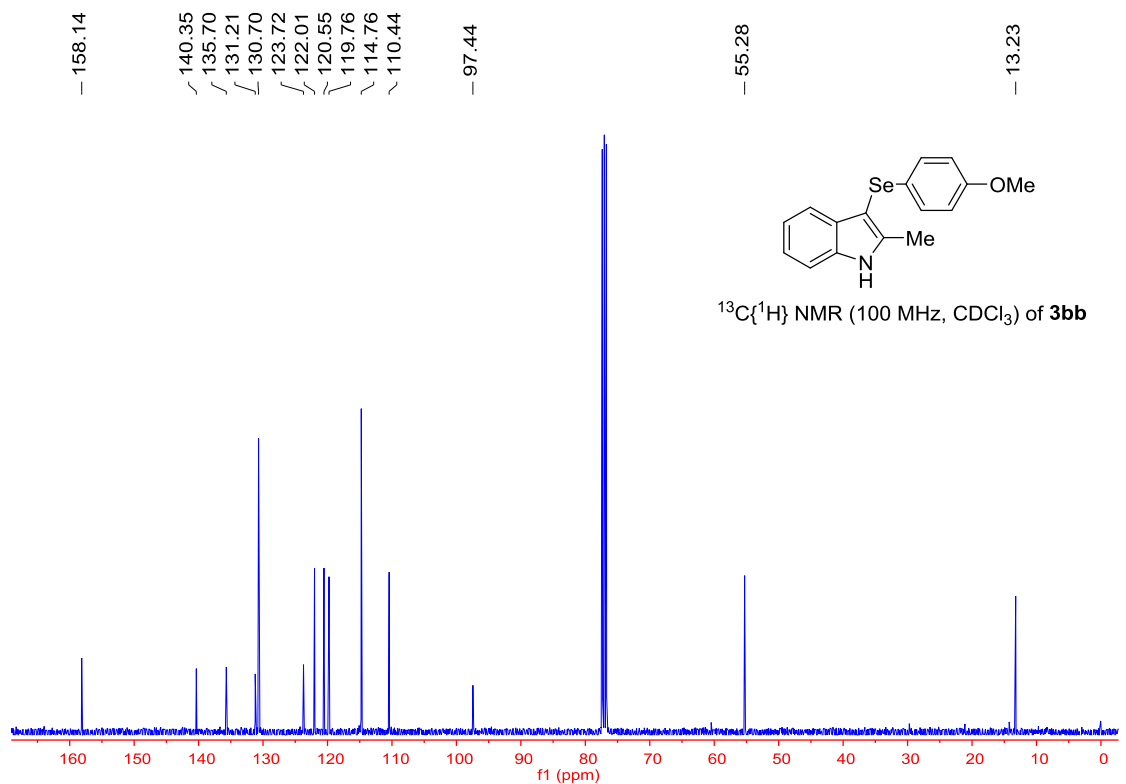

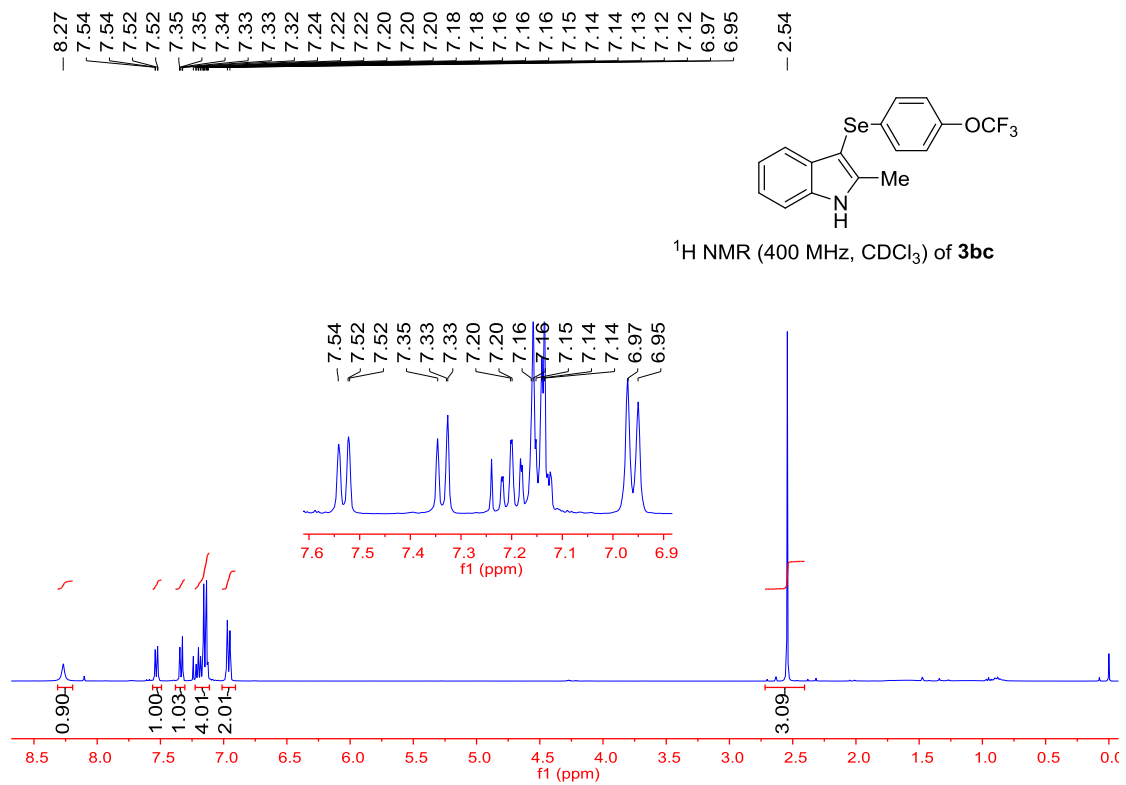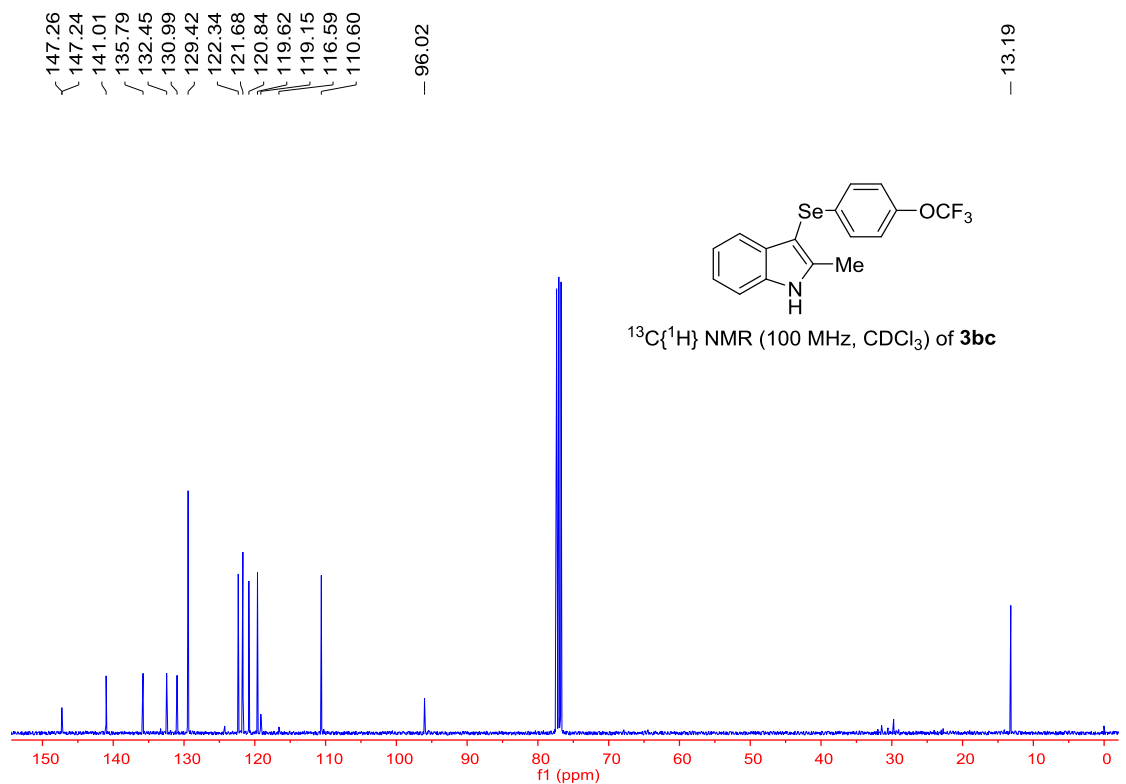

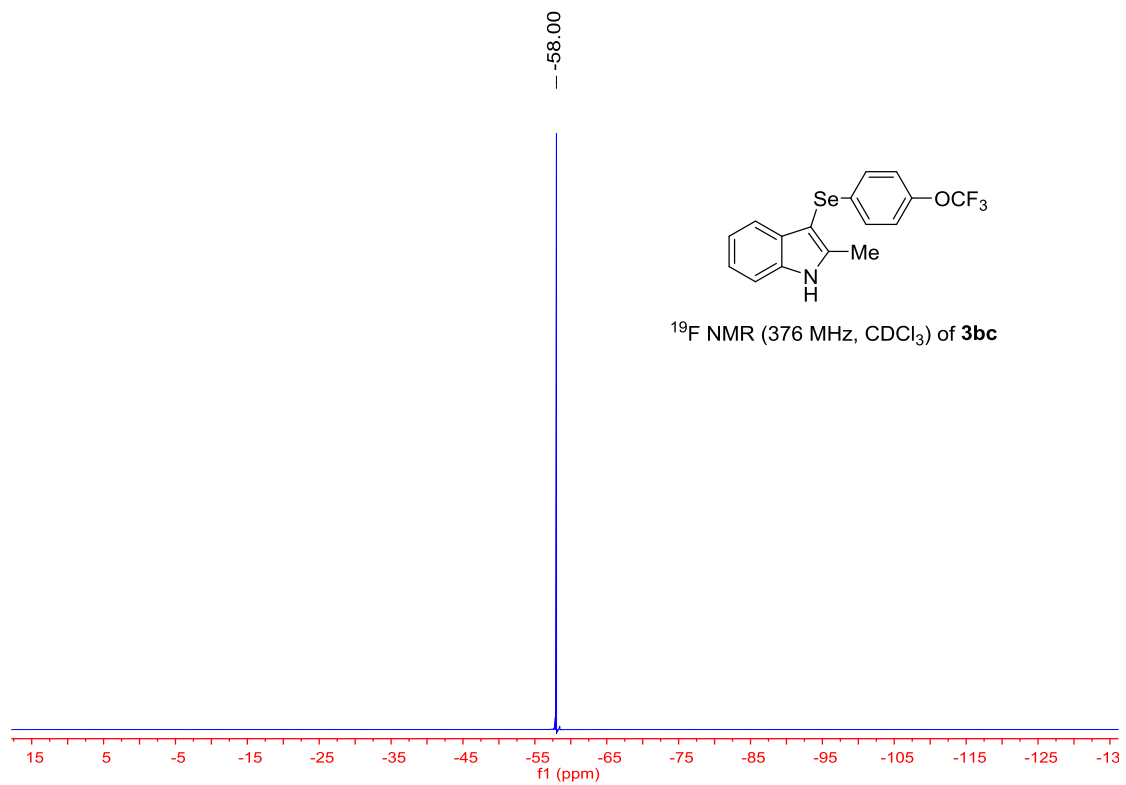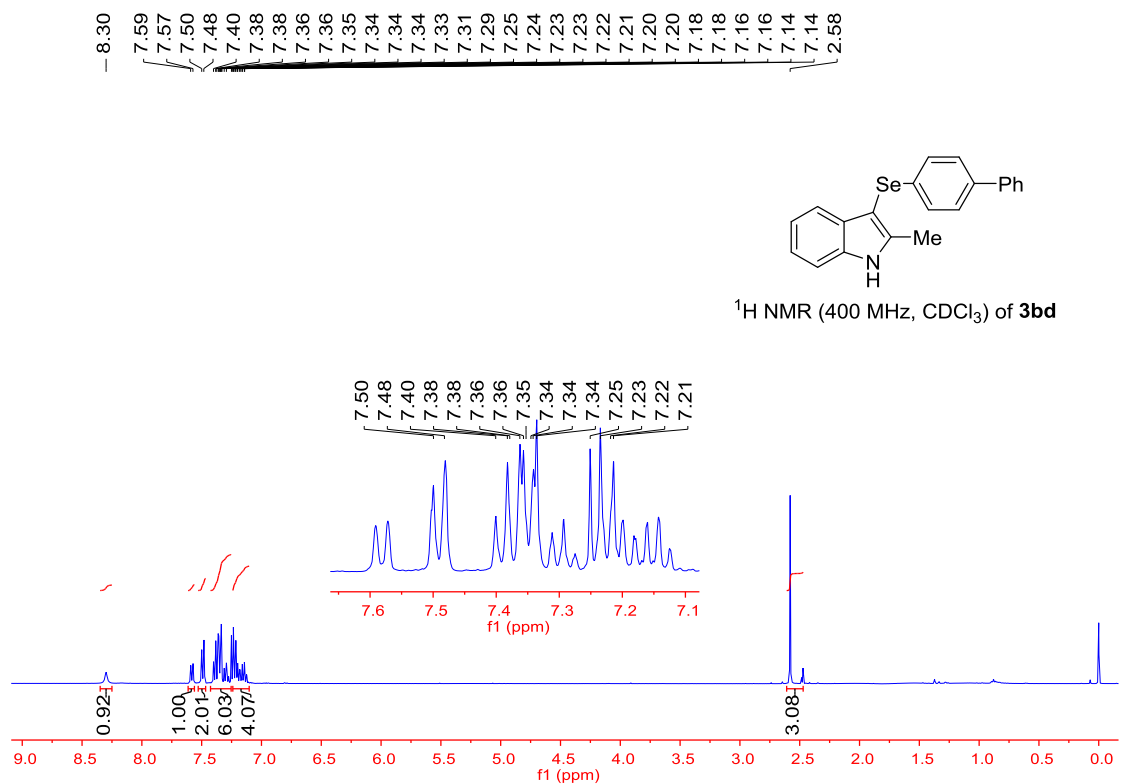

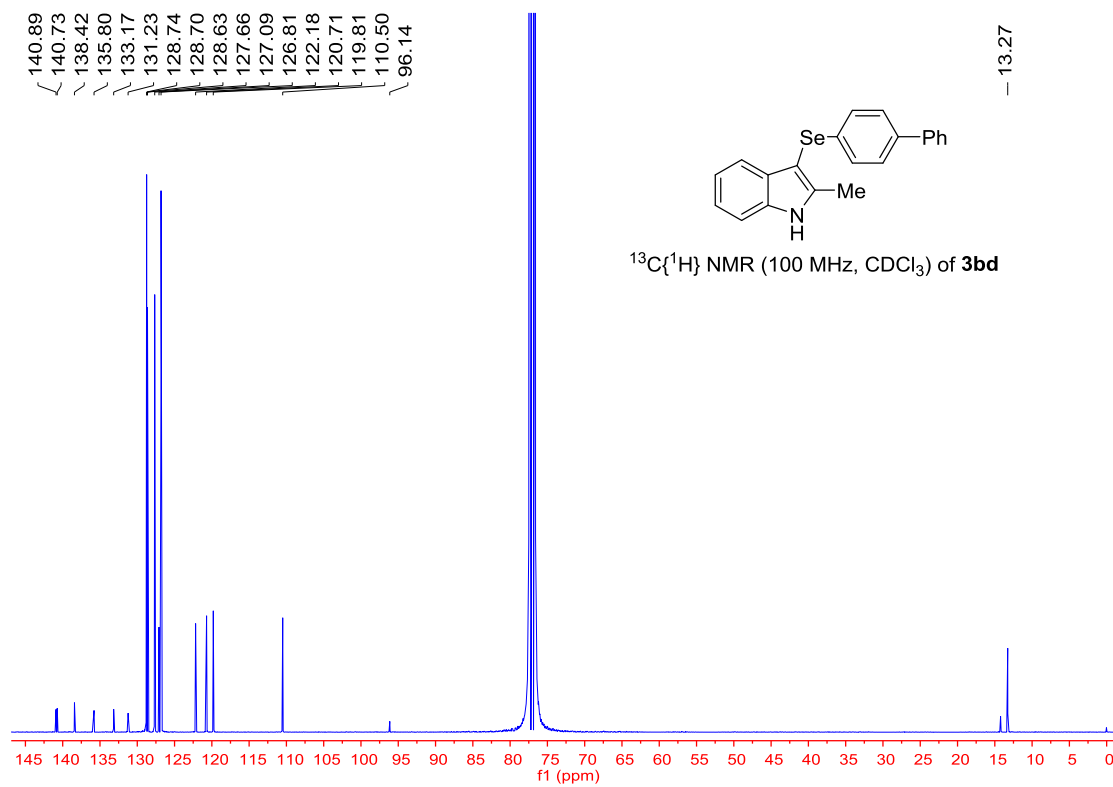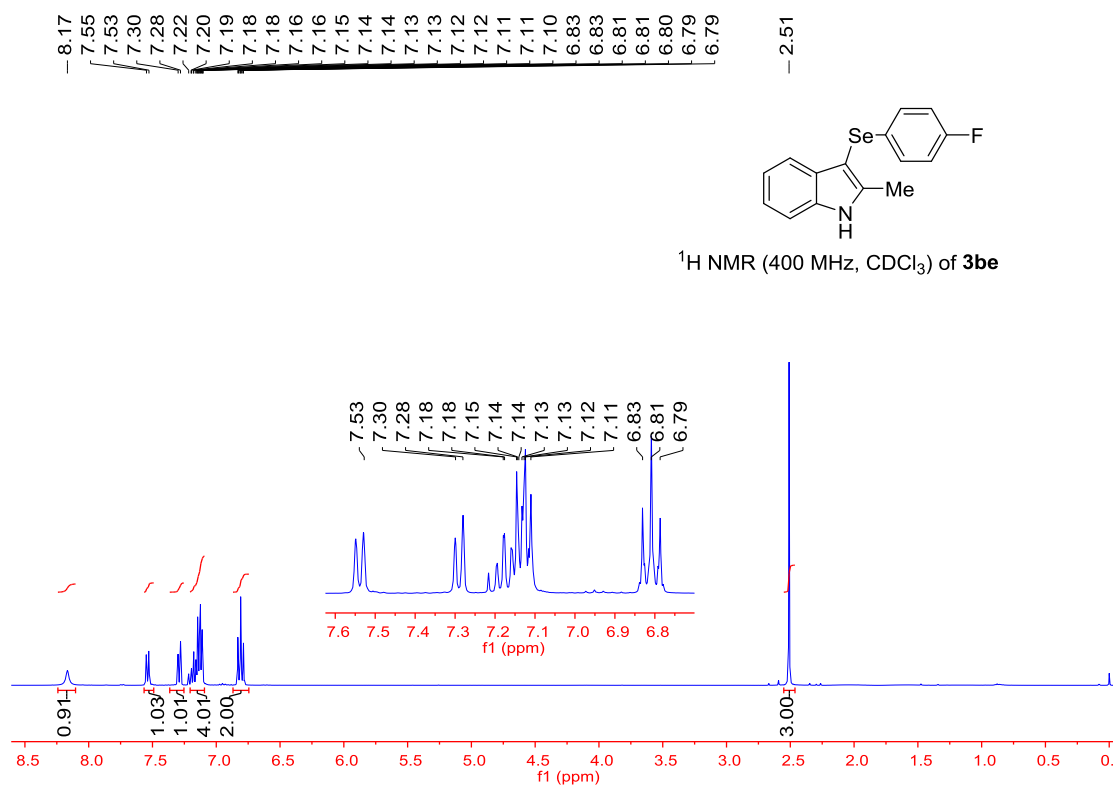



162.65  
160.22  
140.76  
135.77  
131.06  
130.35  
130.28  
128.16  
128.13  
122.23  
120.75  
119.66  
116.16  
115.94  
110.60  
96.72

13.19

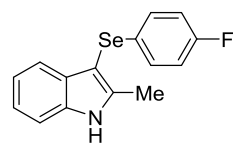

$^{13}\text{C}\{^1\text{H}\}$  NMR (100 MHz,  $\text{CDCl}_3$ ) of **3be**

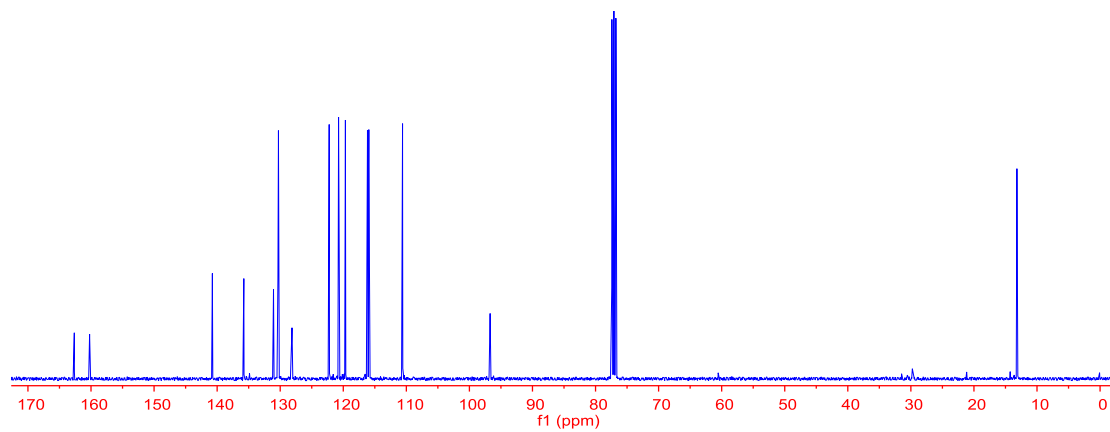

-117.61

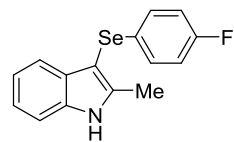

$^{19}\text{H}$  NMR (376 MHz,  $\text{CDCl}_3$ ) of **3be**

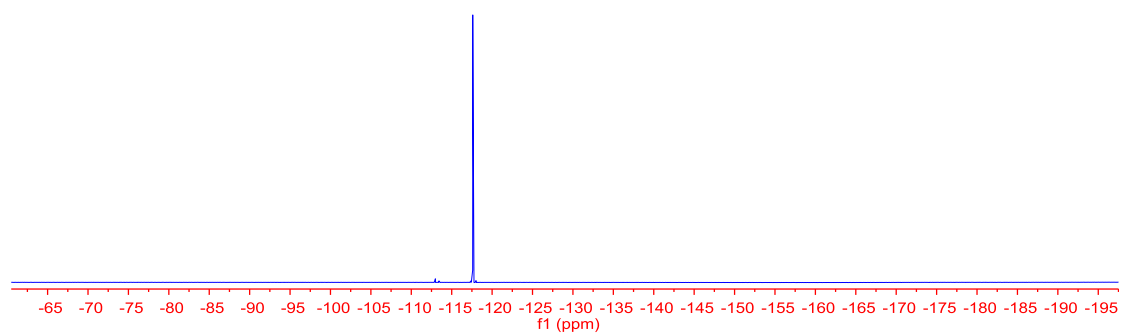

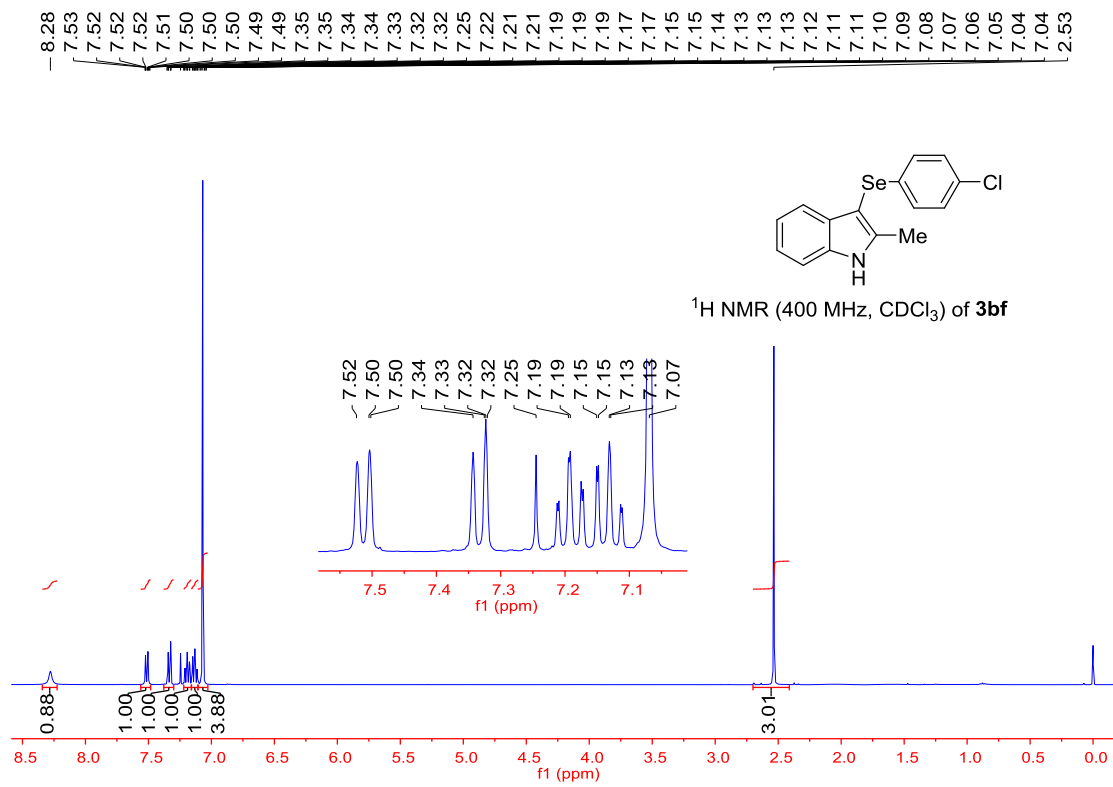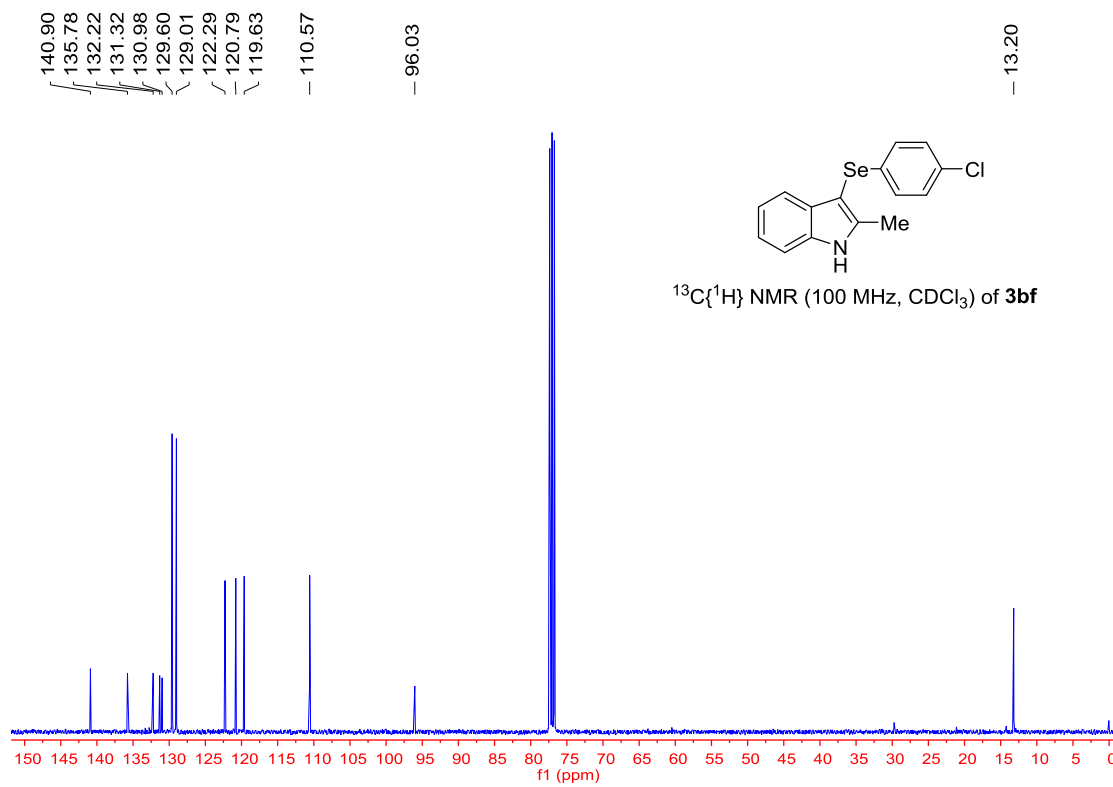

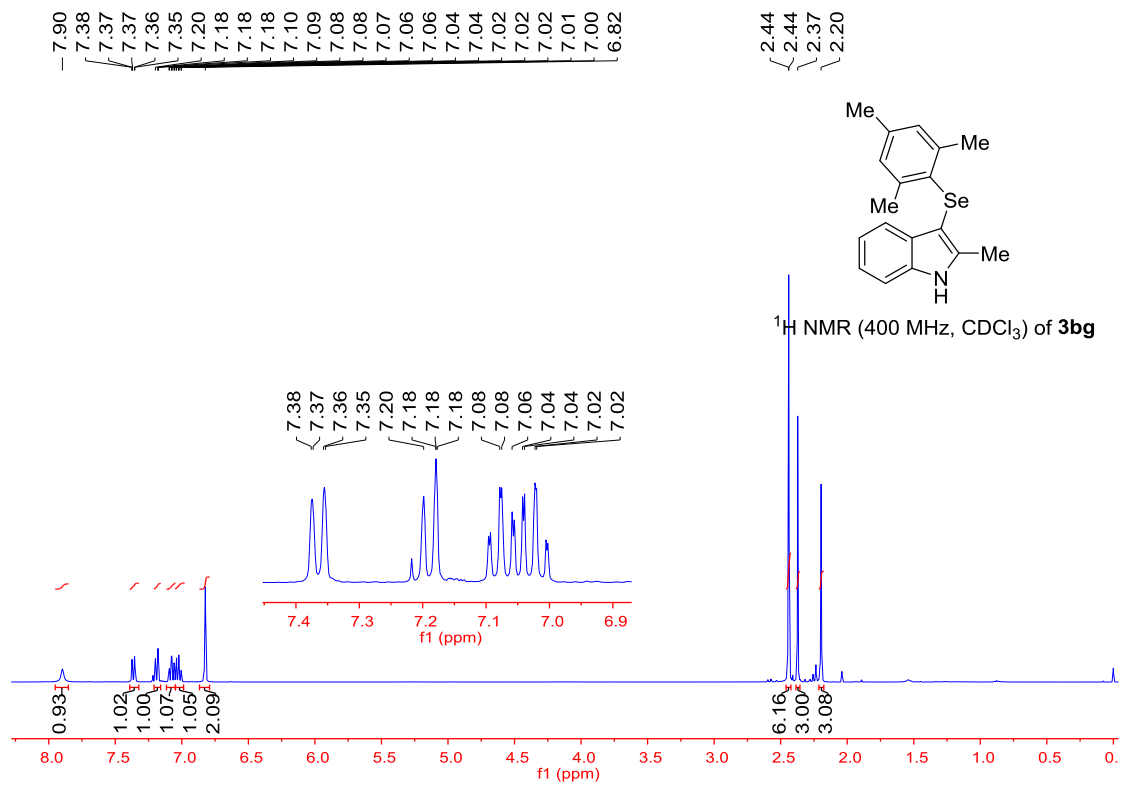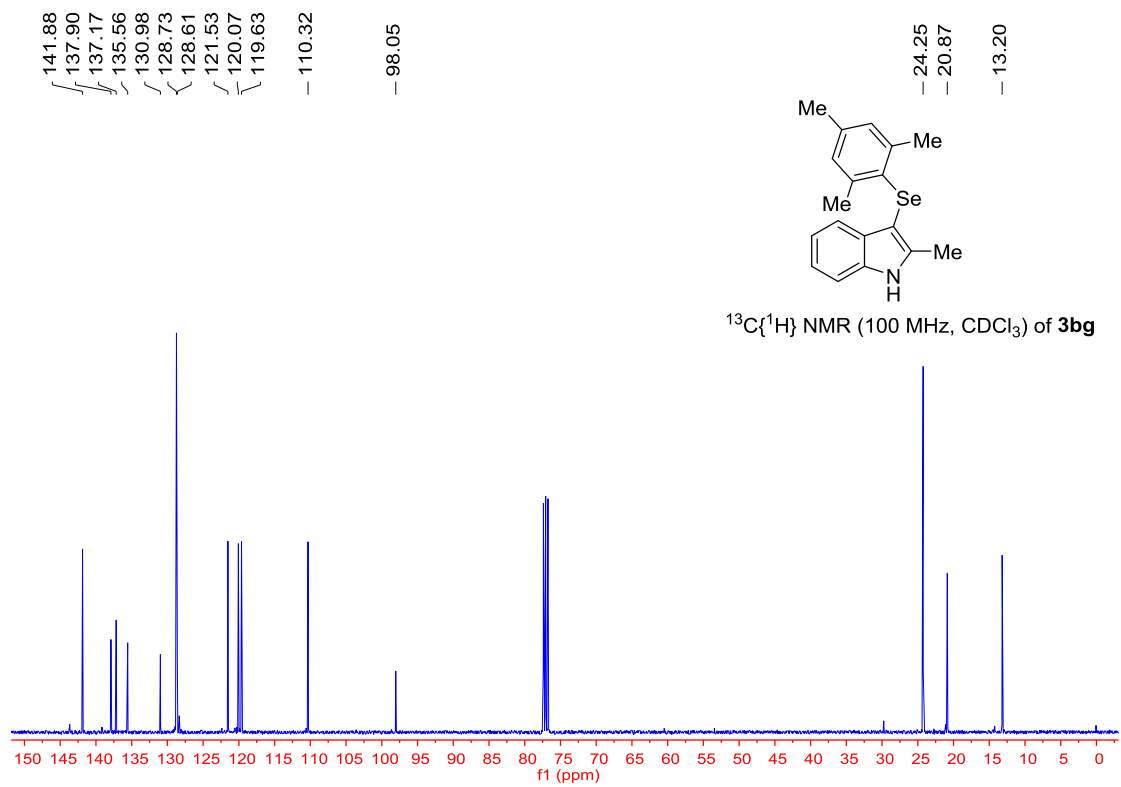

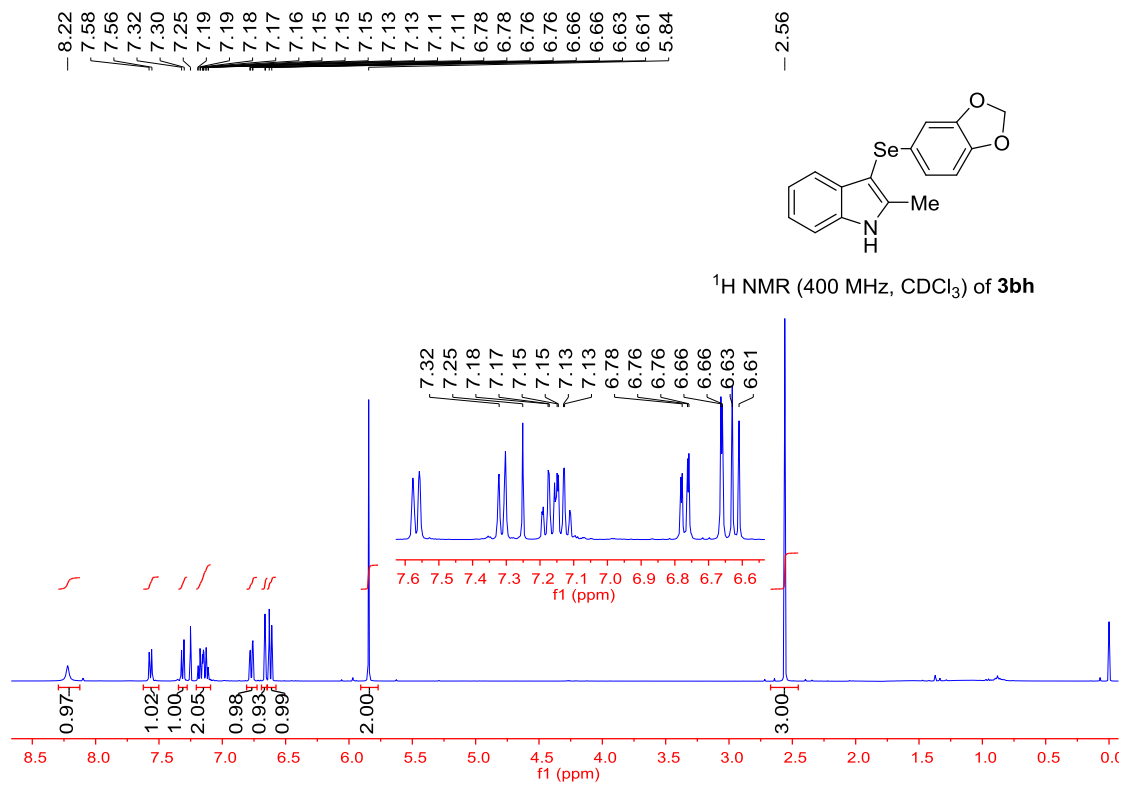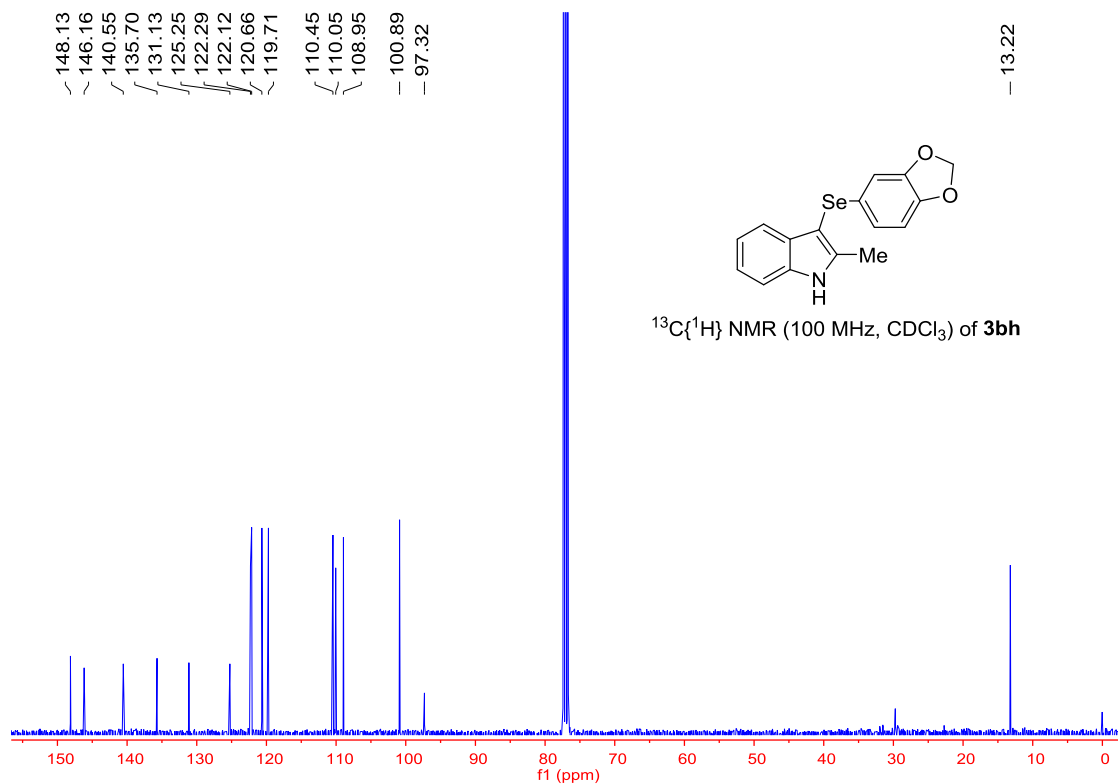

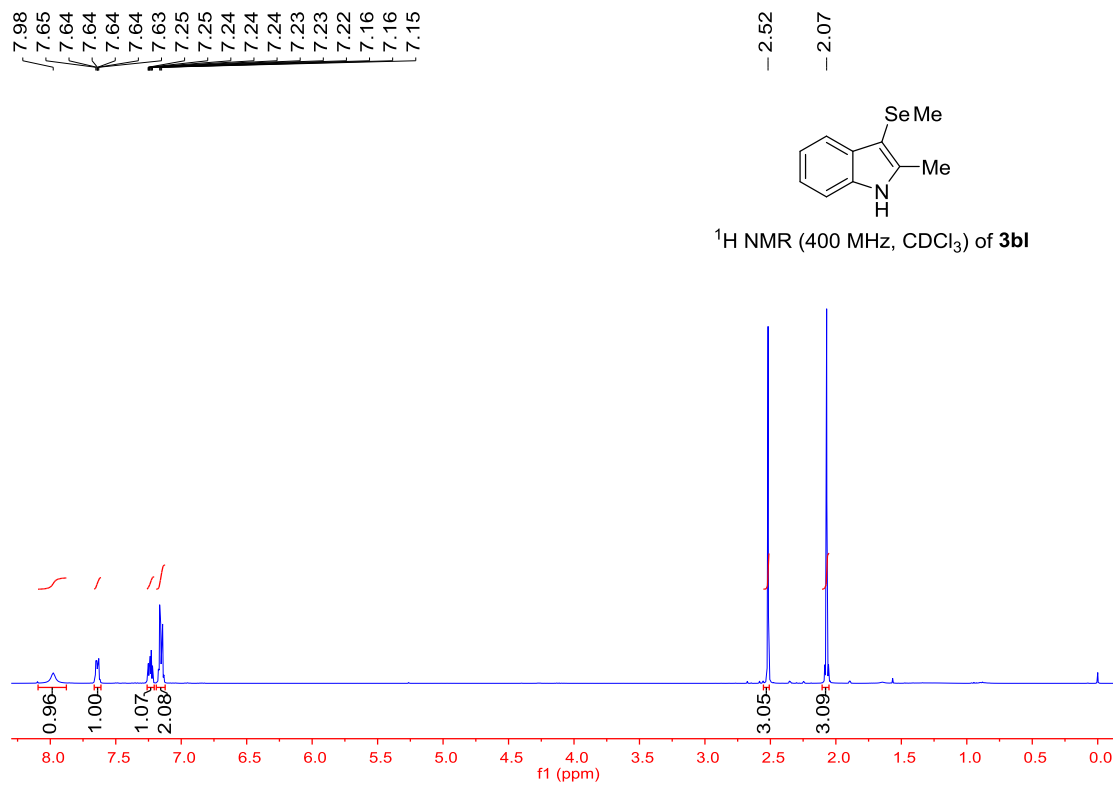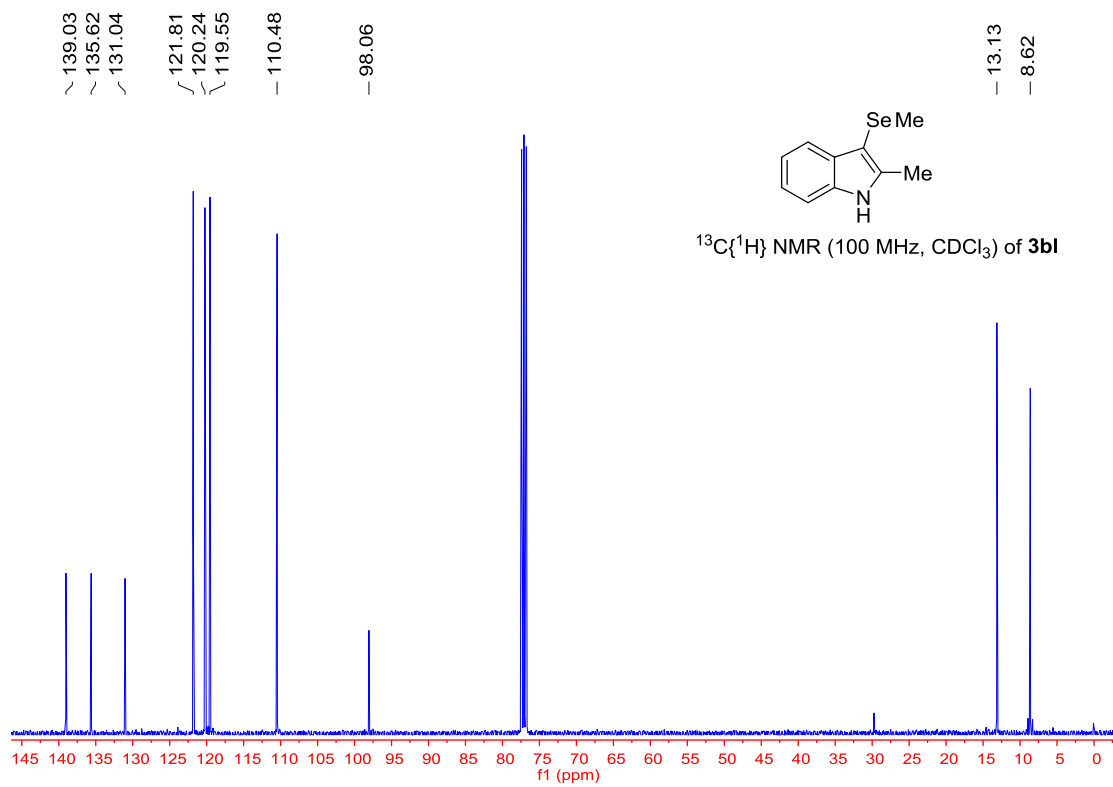

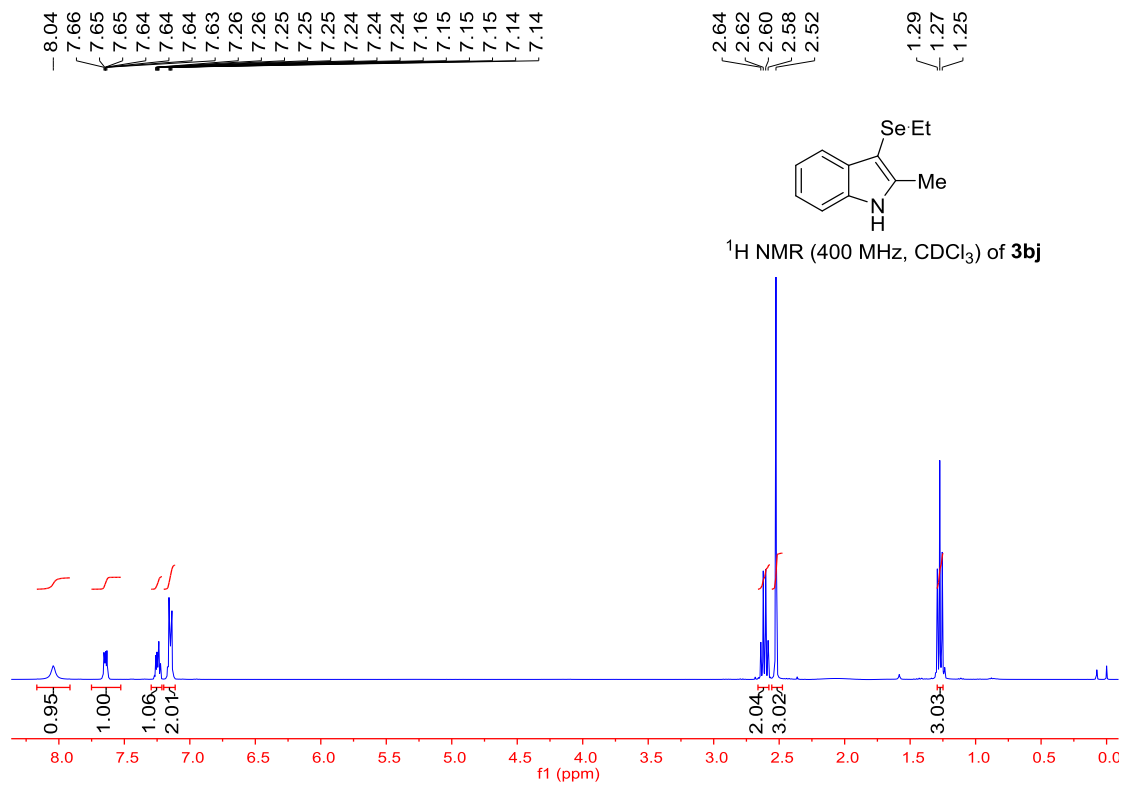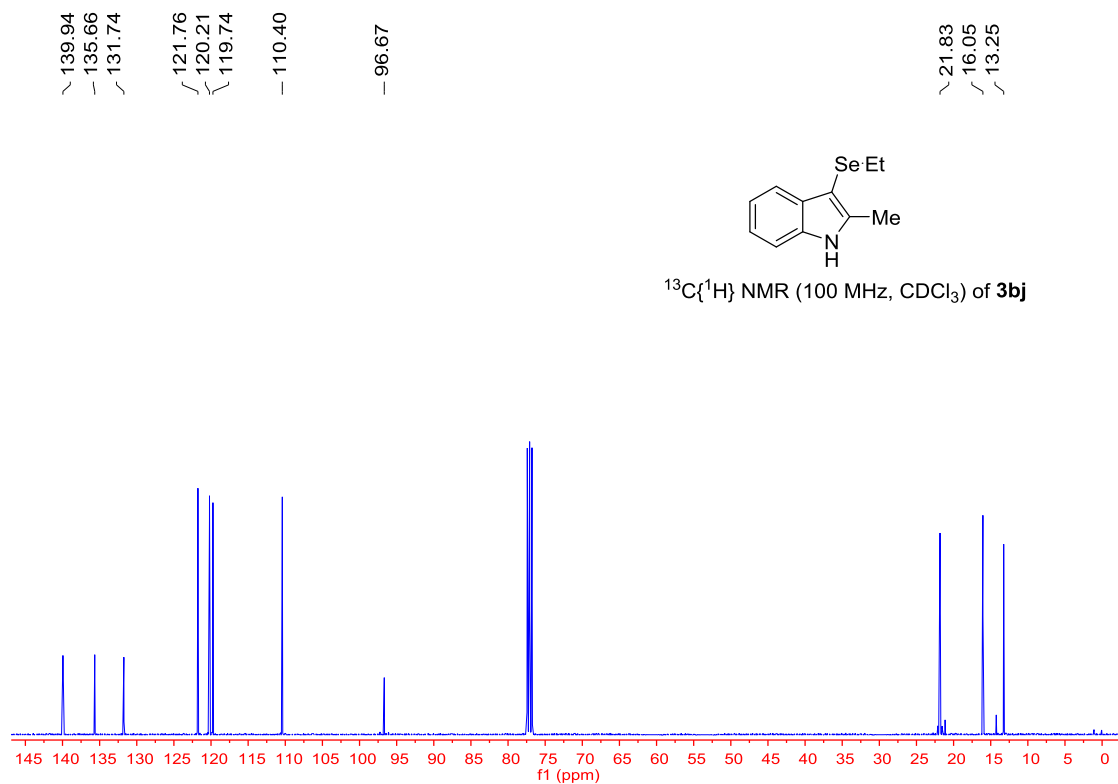

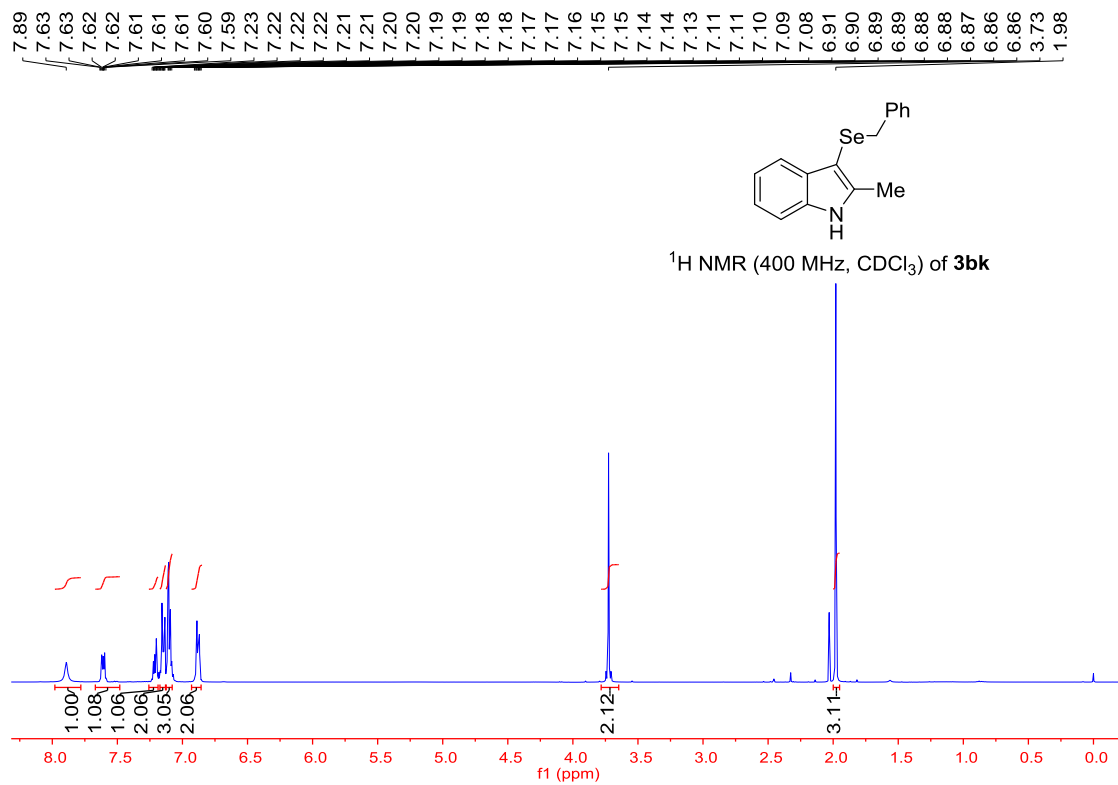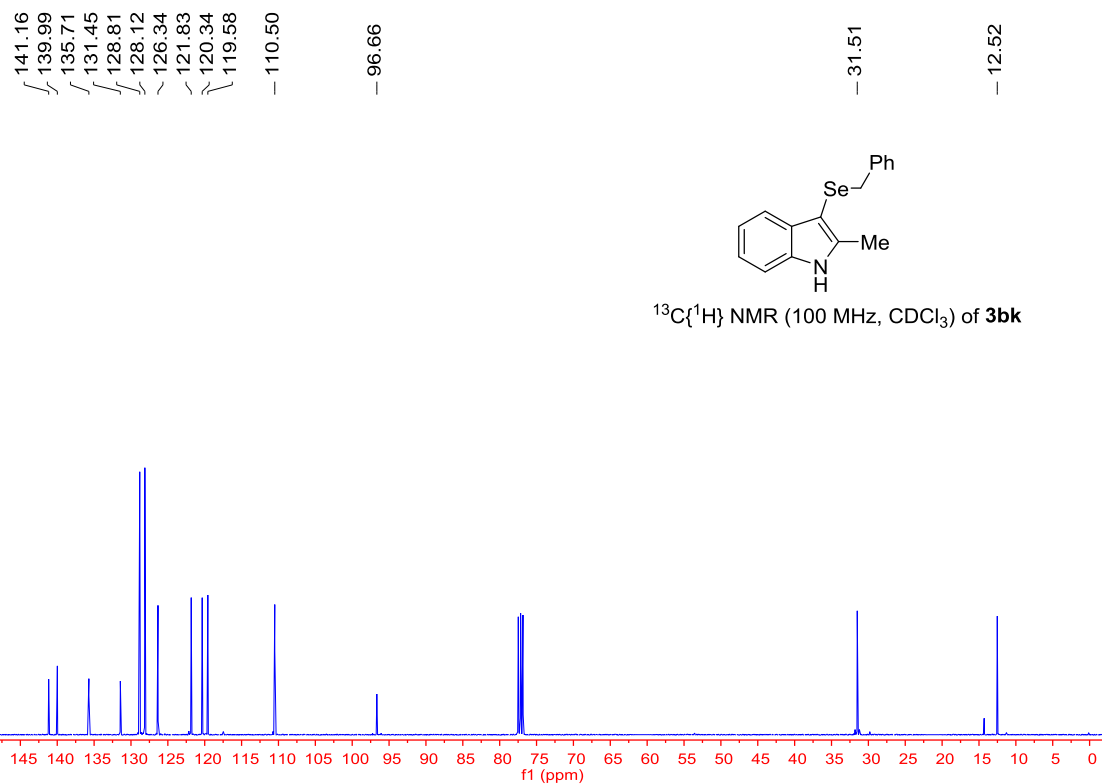

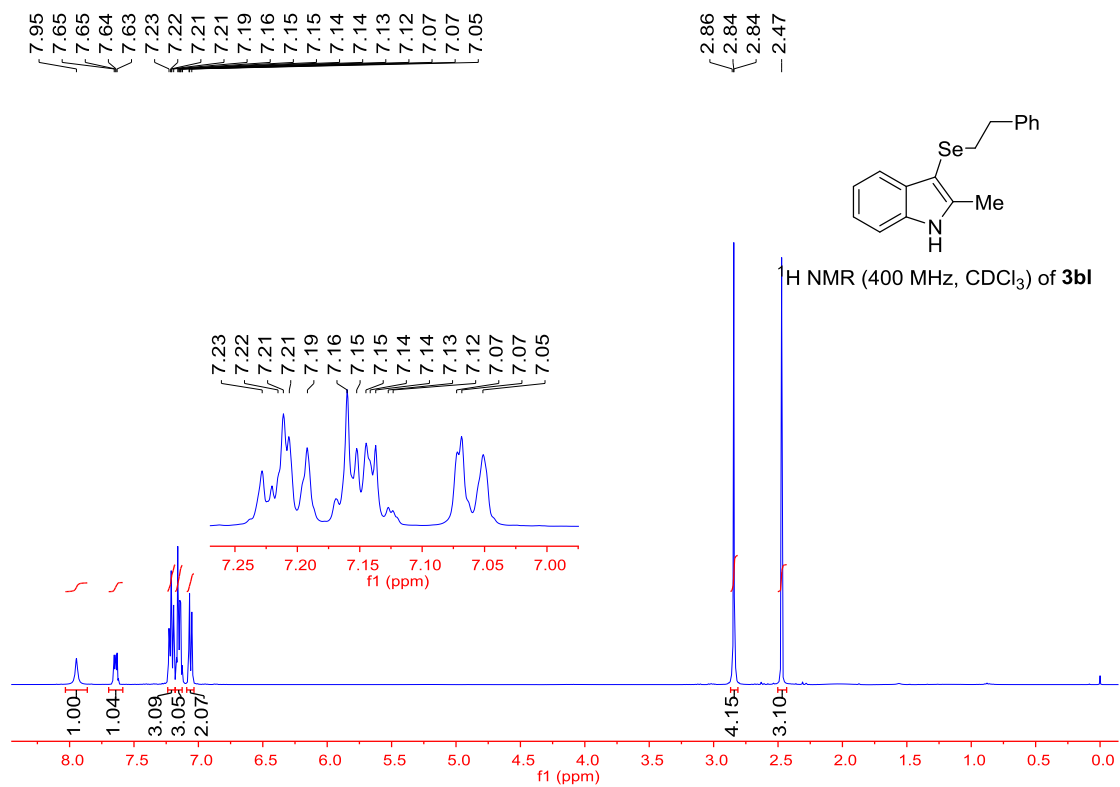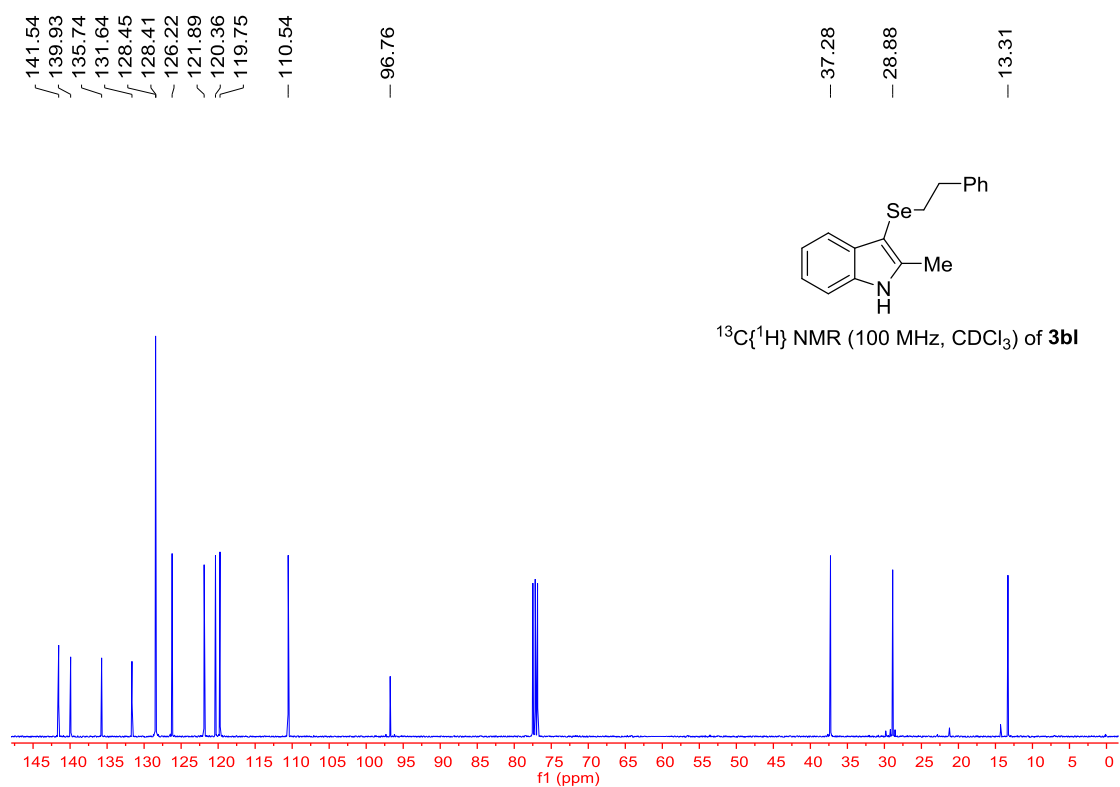



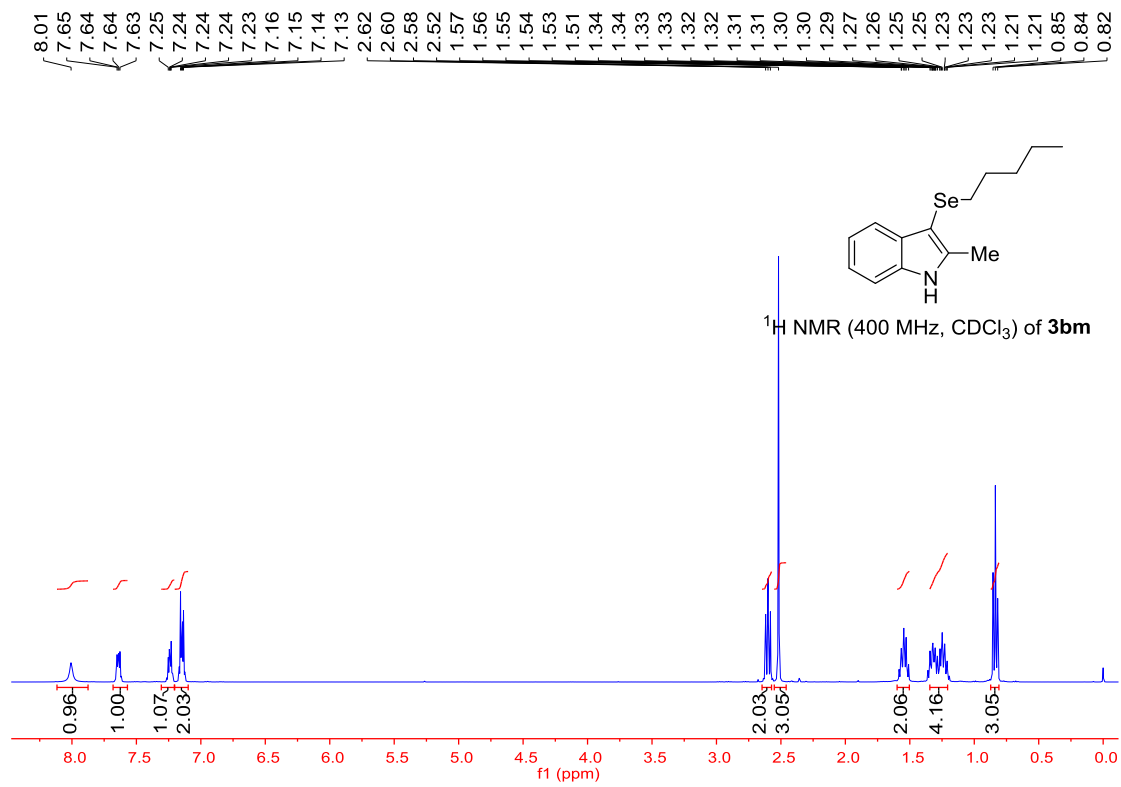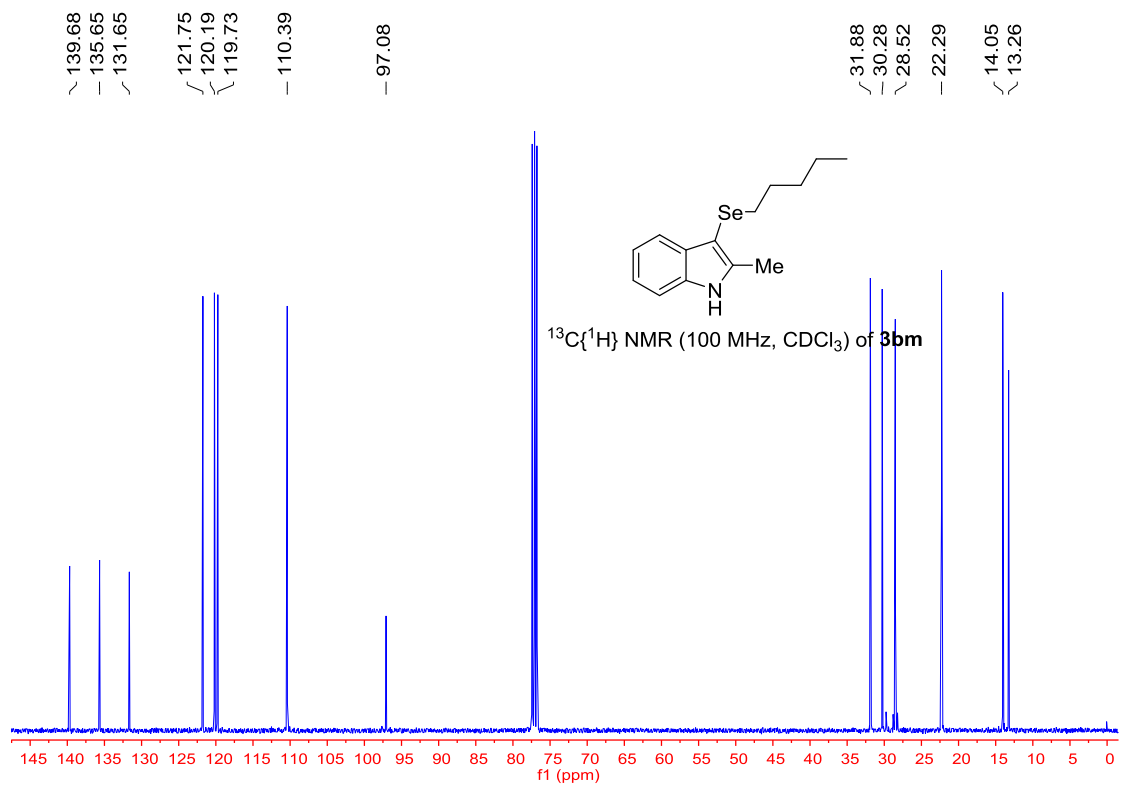

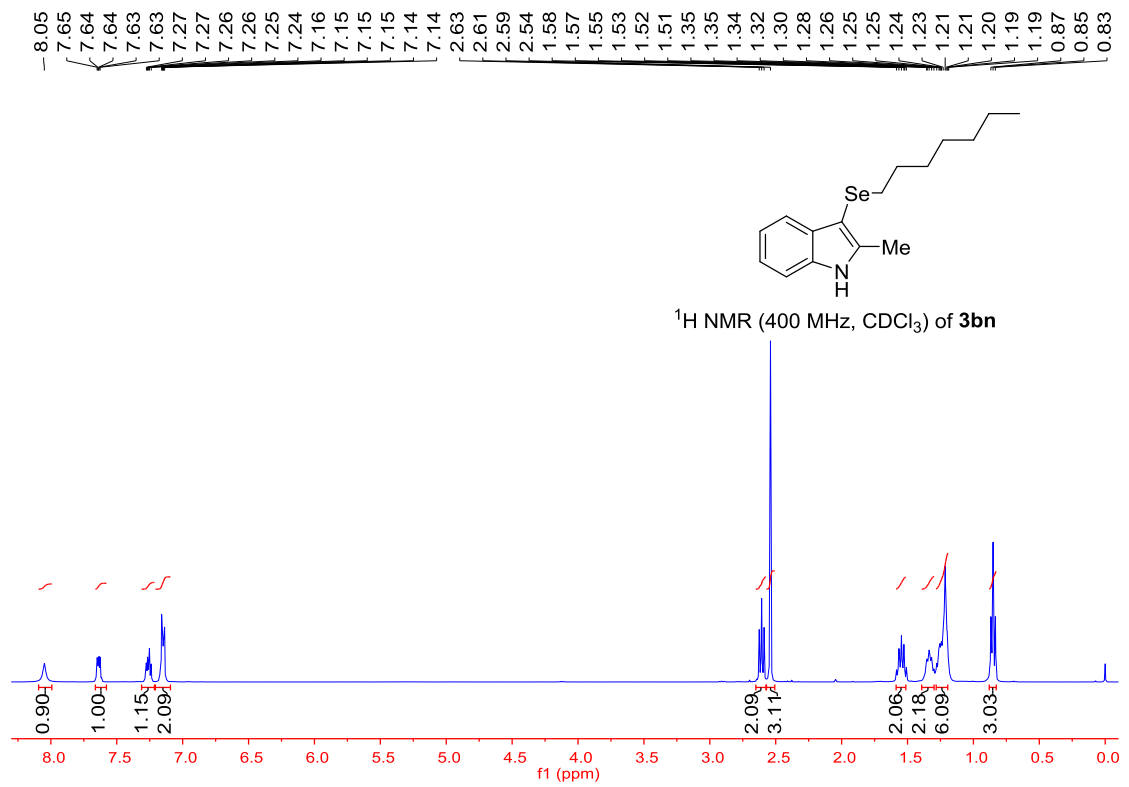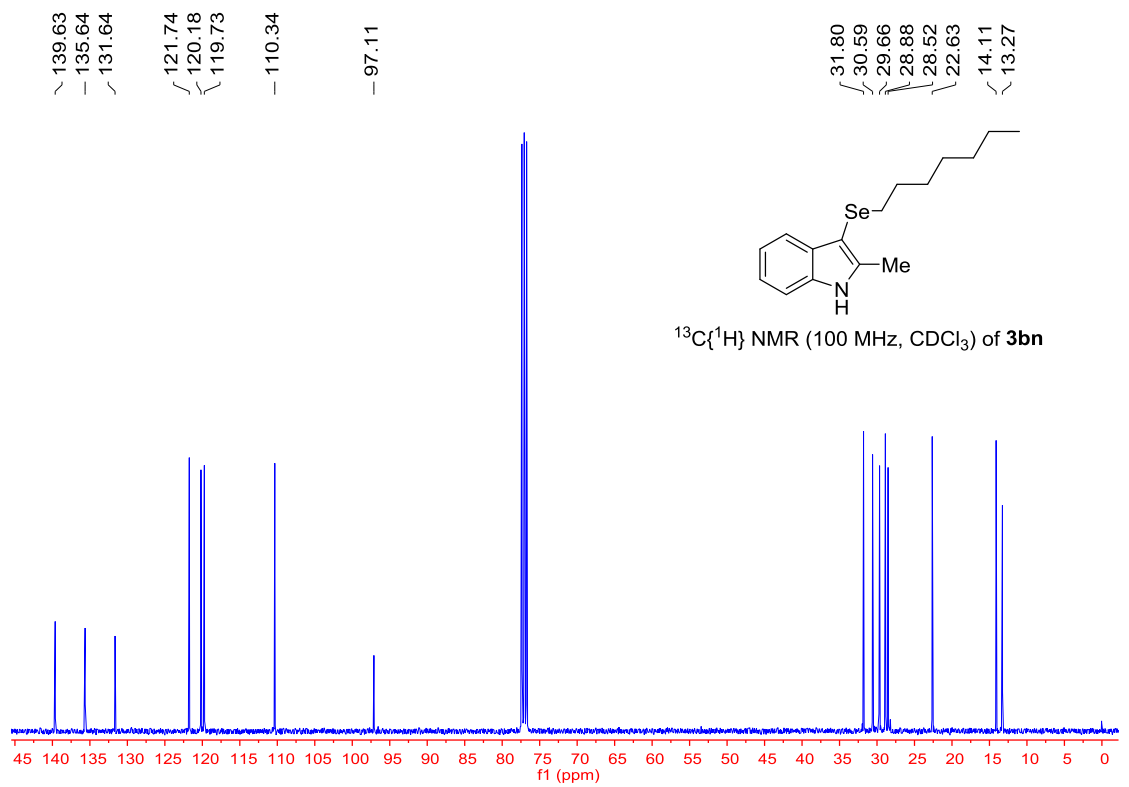

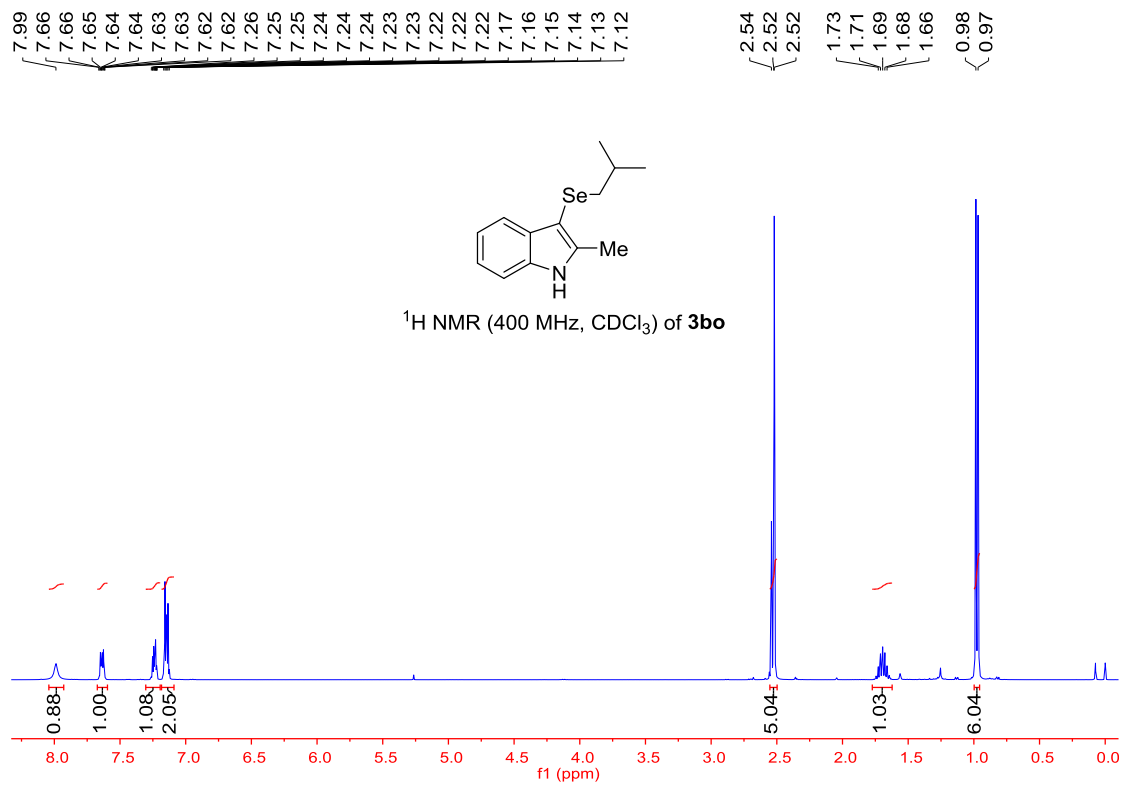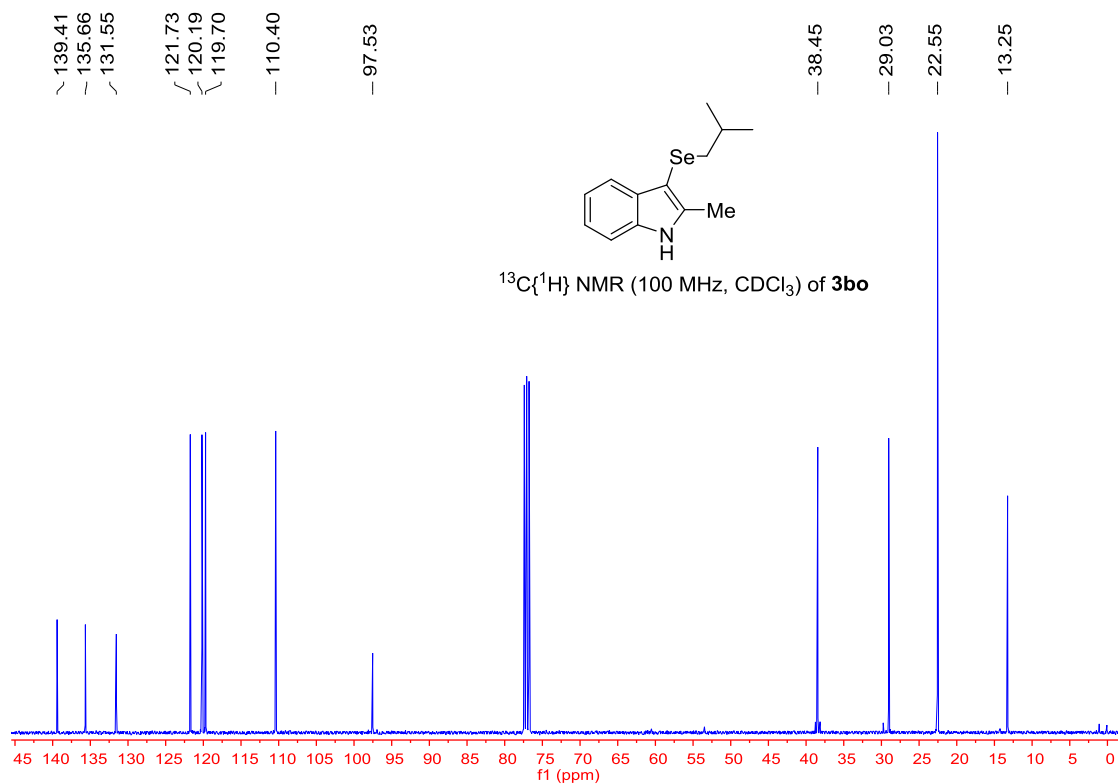

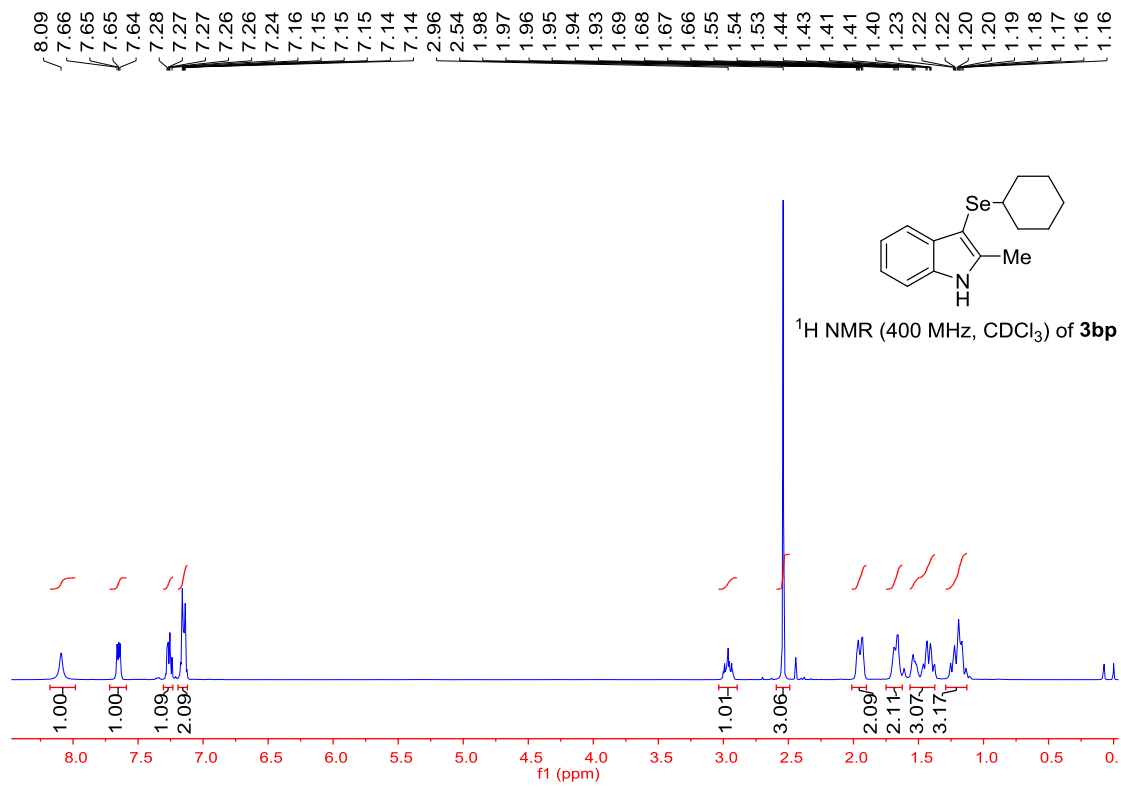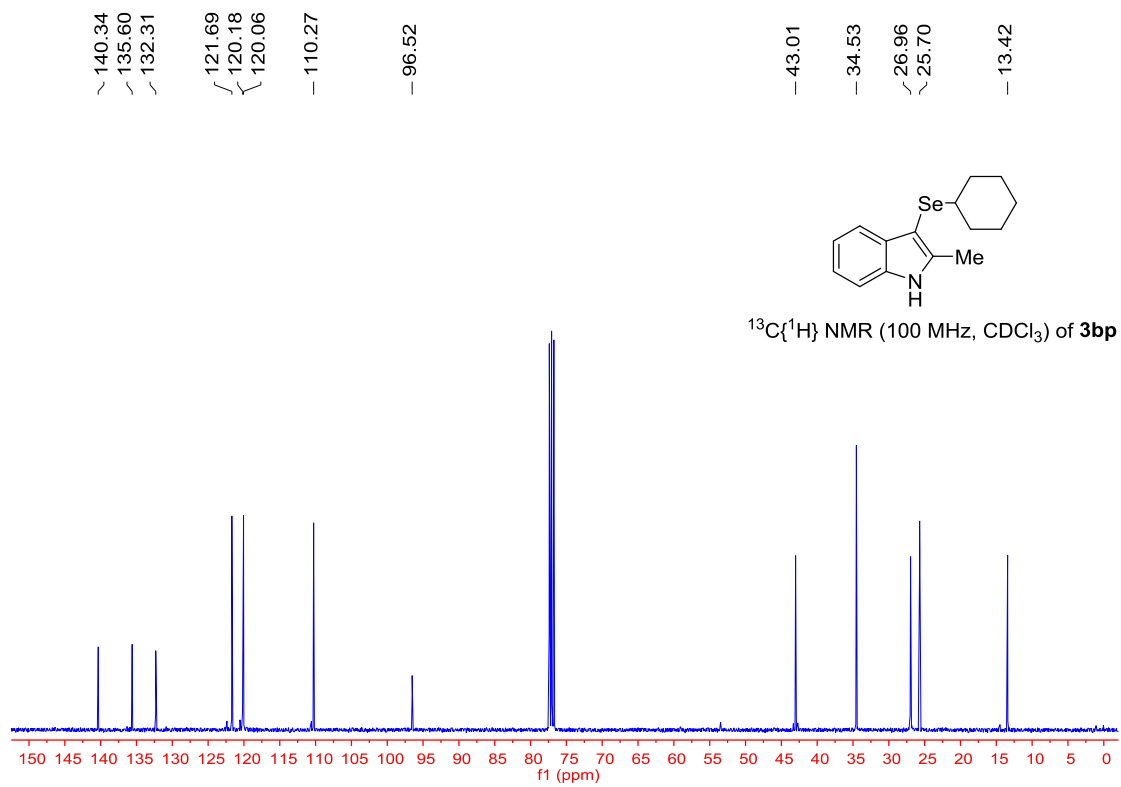

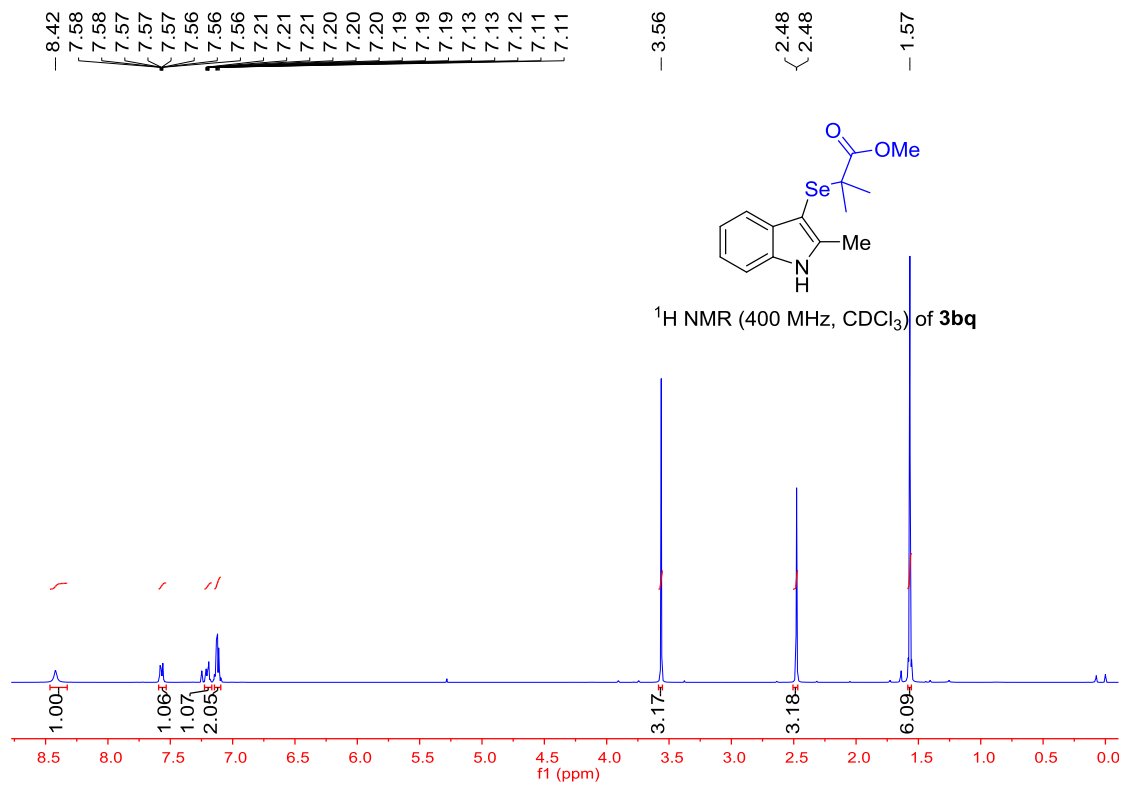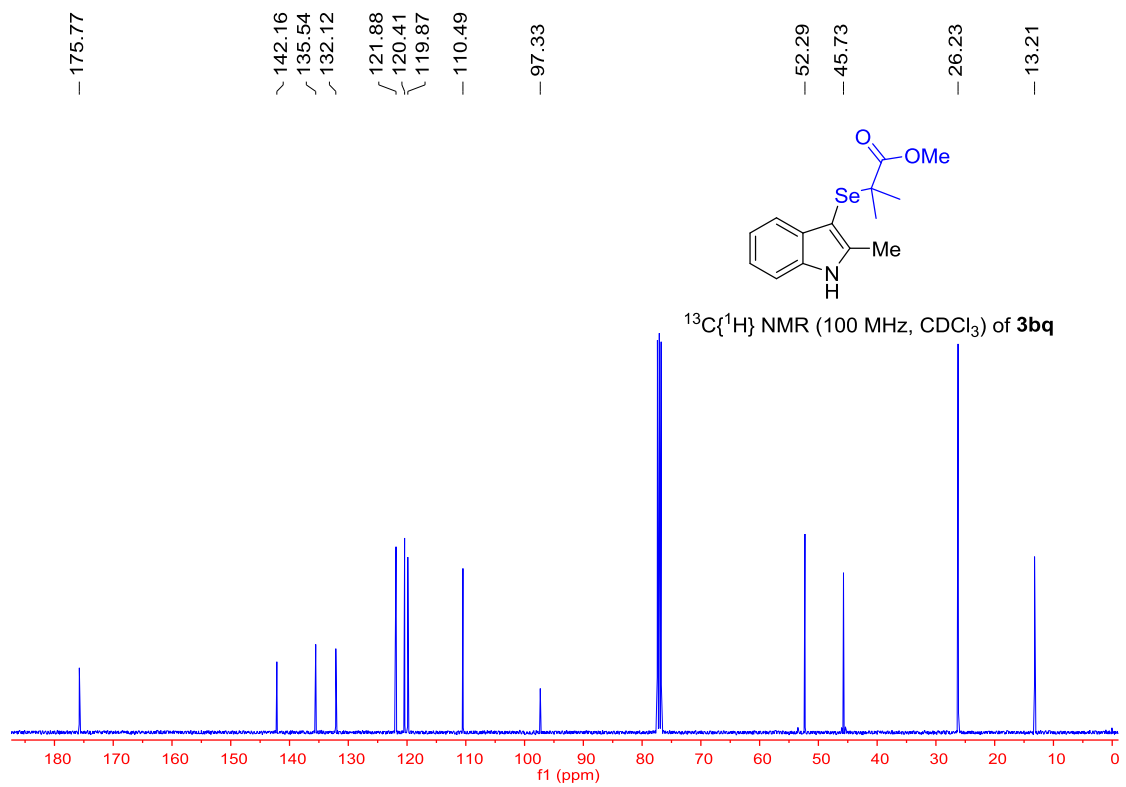

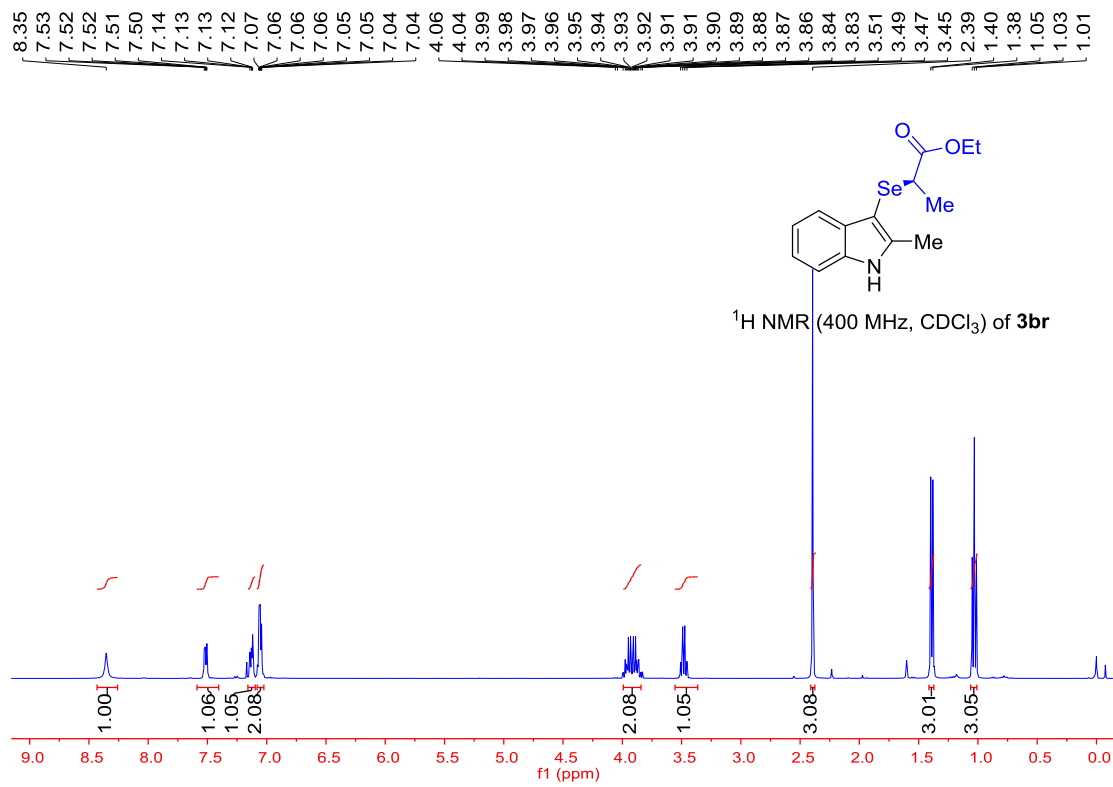

- 174.17  
- 141.76  
- 135.58  
- 131.90  
- 121.88  
- 120.40  
- 119.61  
- 110.52  
- 95.66  
- 61.01  
- 36.75  
- 17.58  
- 13.92  
- 13.13

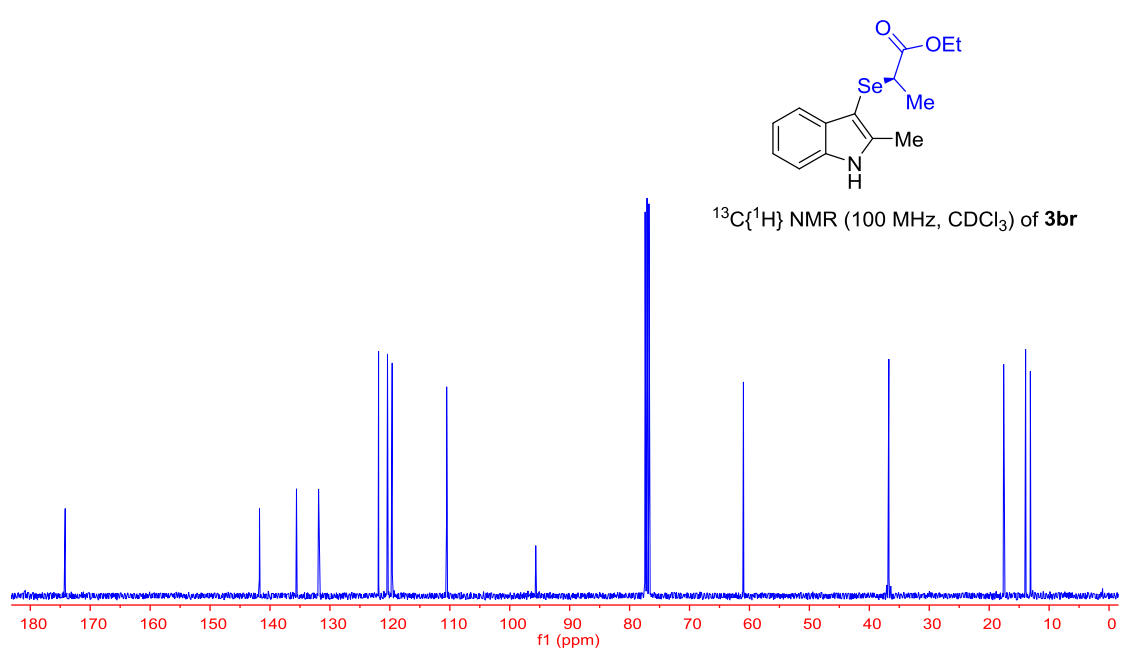

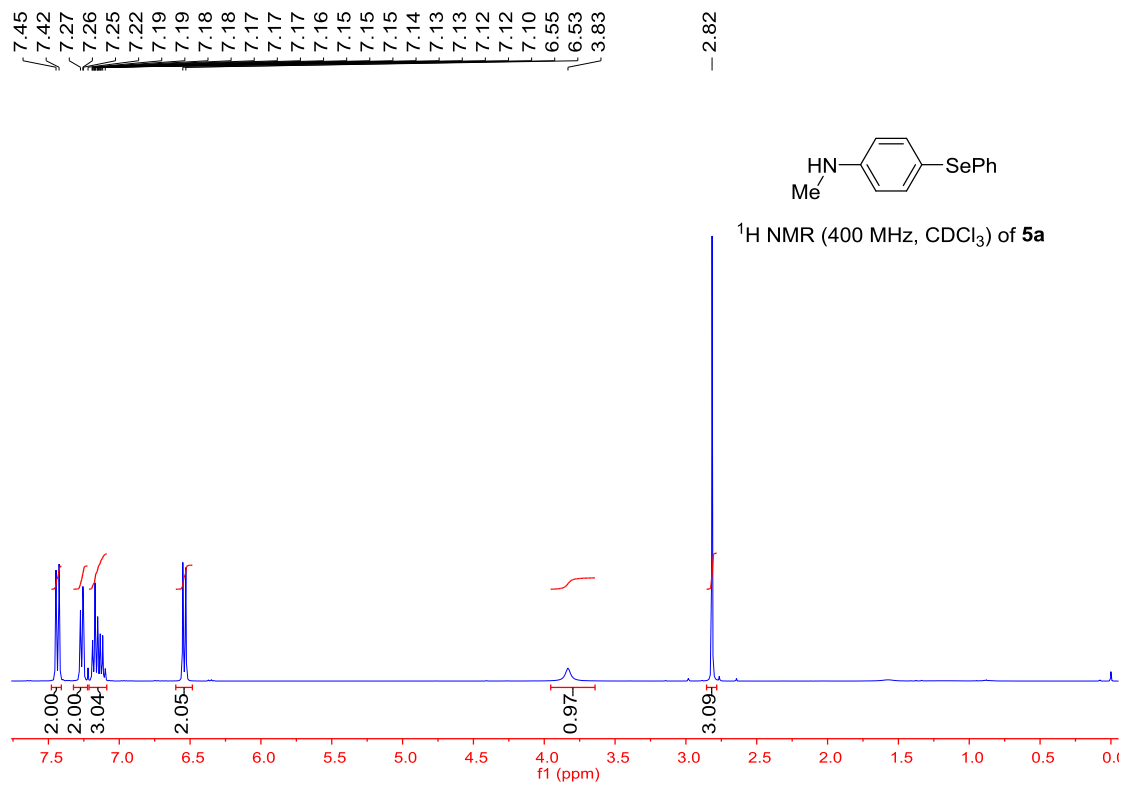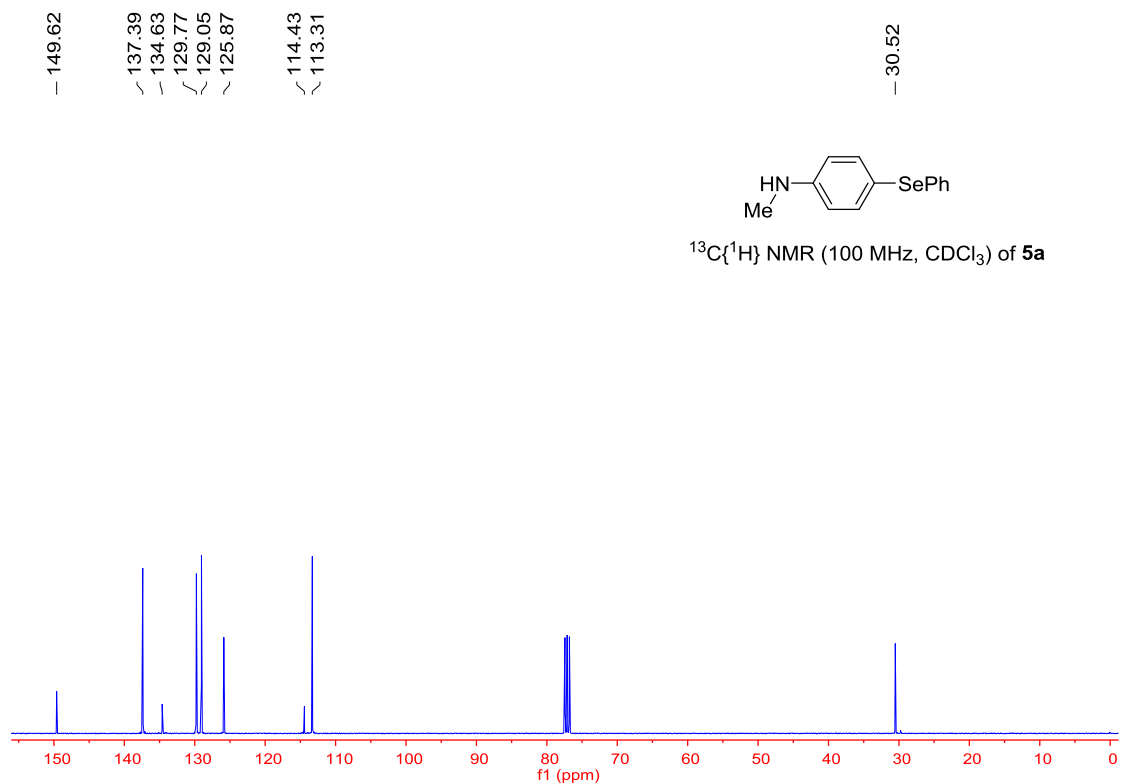

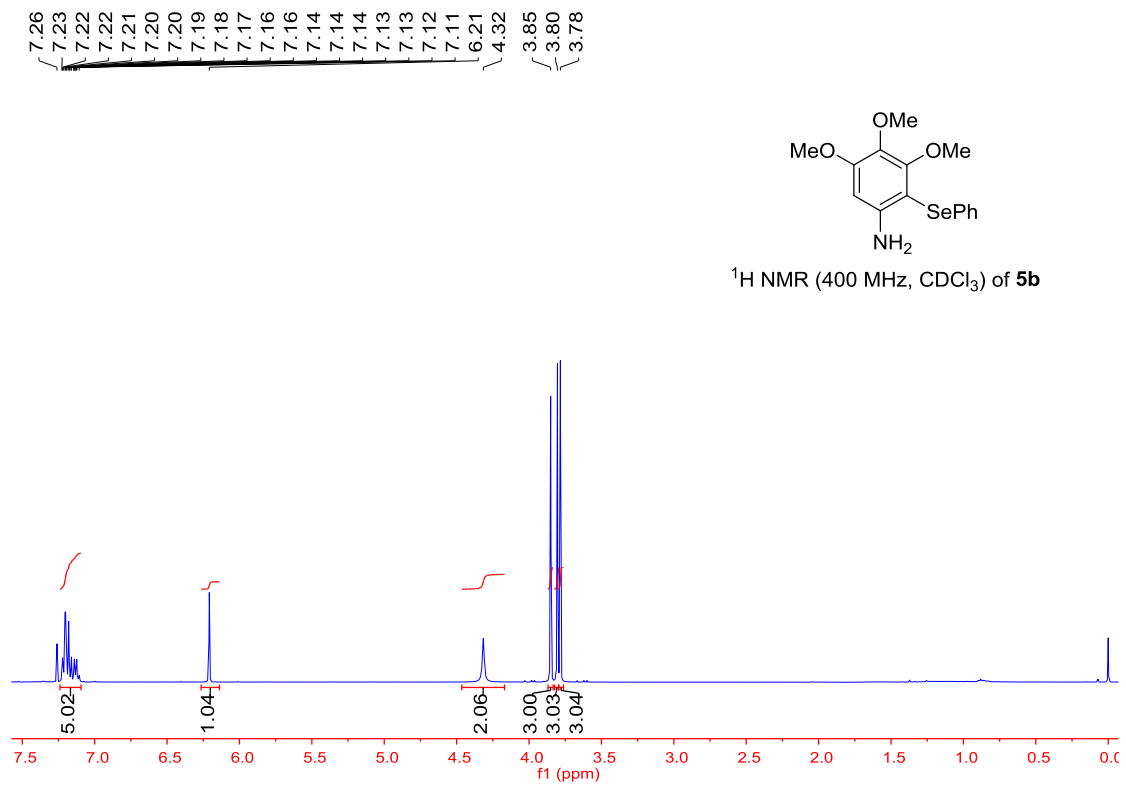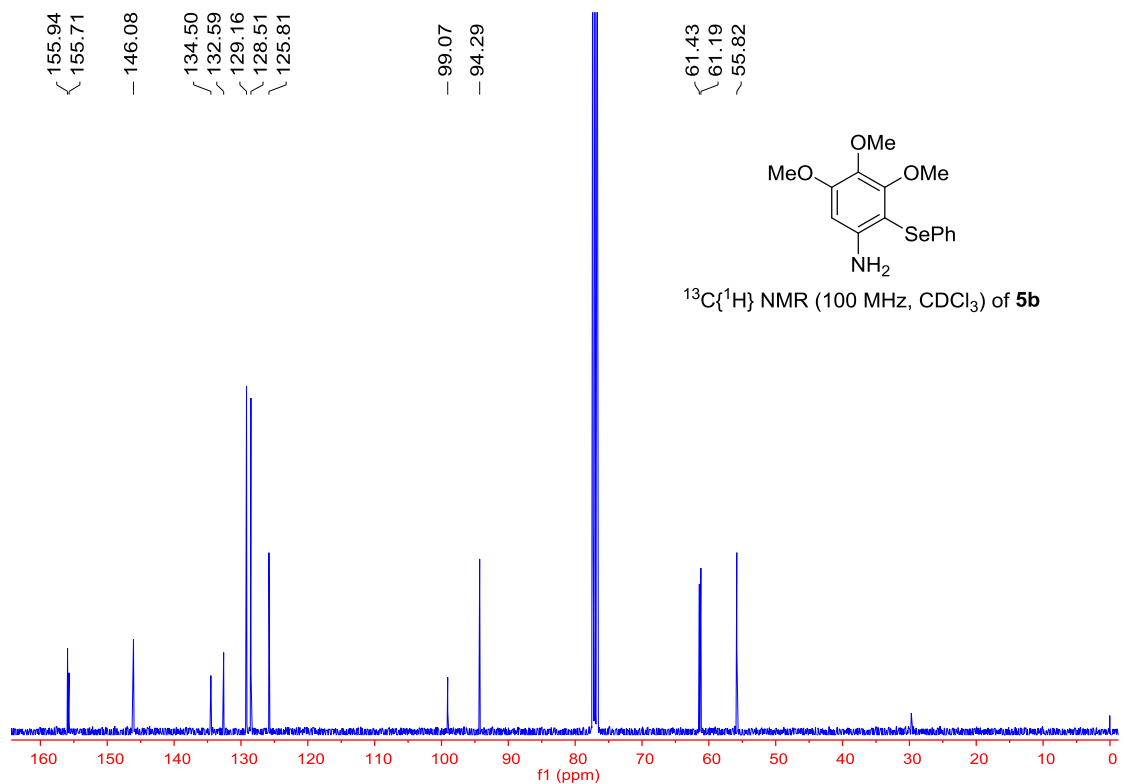



7.16  
7.14  
7.14  
7.13  
7.11  
7.11  
7.10  
7.09  
7.09  
7.08  
7.07  
6.98  
6.33  
5.83

— 4.07

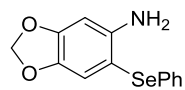

$^1\text{H}$  NMR (400 MHz,  $\text{CDCl}_3$ ) of **5c**

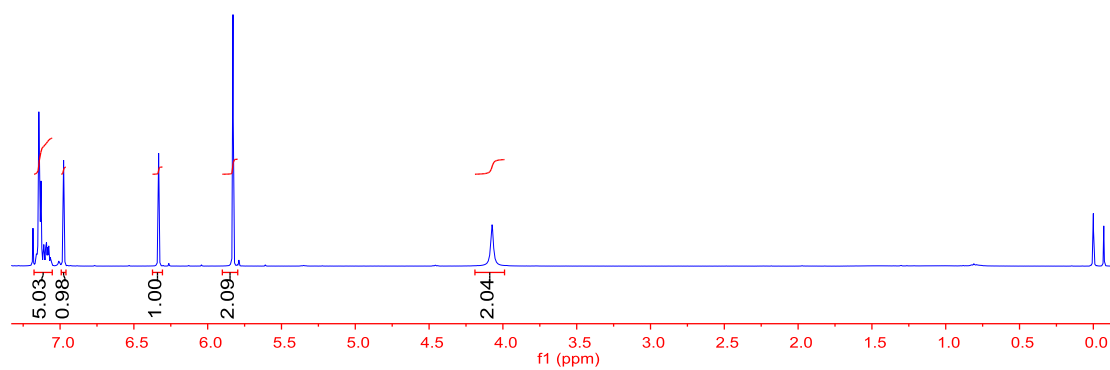

149.27  
143.56  
139.31  
131.30  
128.19  
127.78  
125.04  
— 116.03  
101.28  
100.03  
95.89

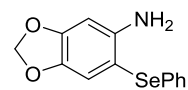

$^{13}\text{C}\{^1\text{H}\}$  NMR (100 MHz,  $\text{CDCl}_3$ ) of **5c**

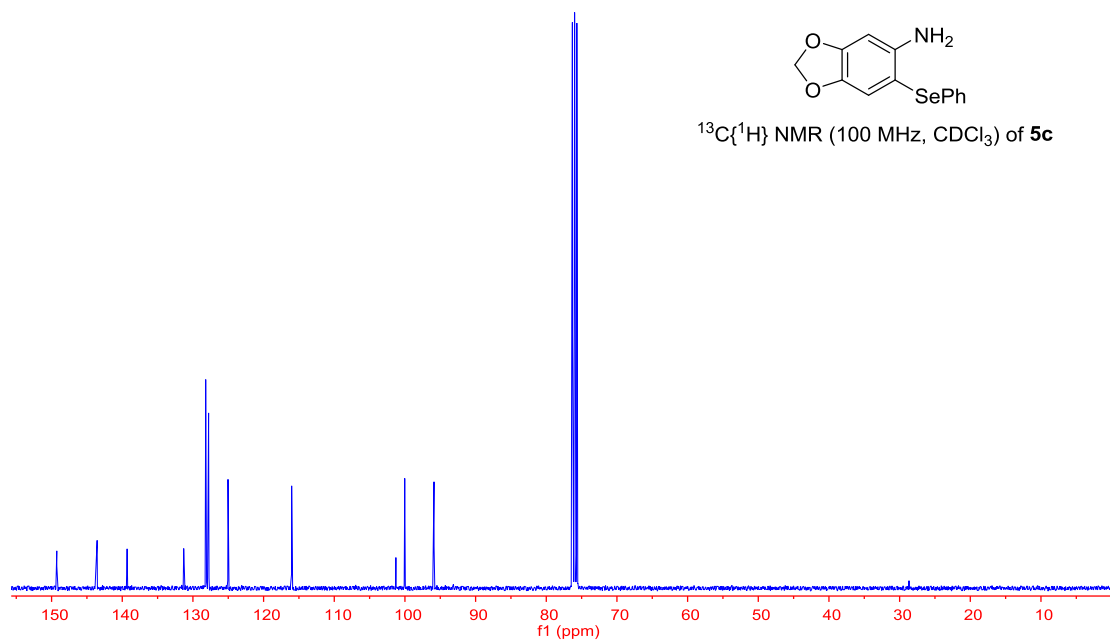

7.19  
7.13  
7.12  
7.11  
7.10  
7.10  
7.08  
7.08  
7.06  
7.06  
7.05  
7.04  
7.04  
7.04  
7.03  
7.02  
7.02  
7.01  
6.14

3.79  
3.72

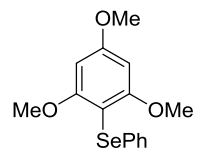

$^1\text{H}$  NMR (400 MHz,  $\text{CDCl}_3$ ) of **5d**

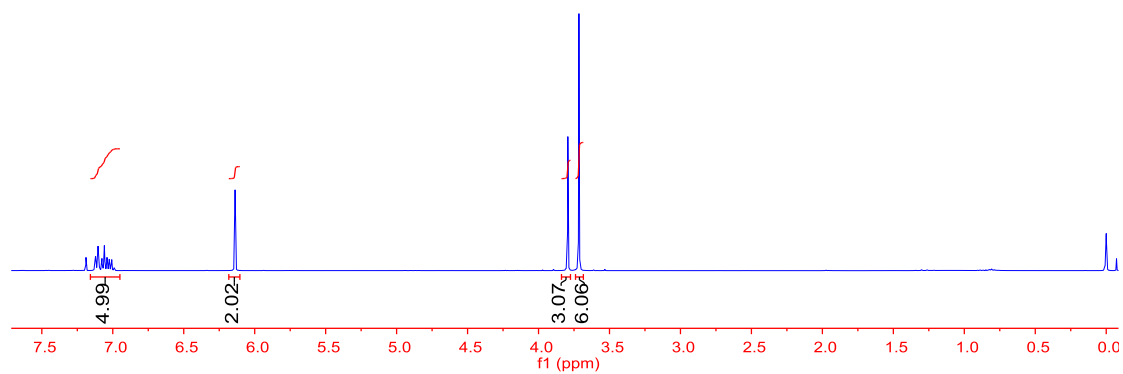

161.9  
160.9

132.5  
127.7  
127.7  
124.2

96.0  
90.1

55.3  
54.4

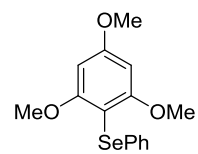

$^{13}\text{C}\{^1\text{H}\}$  NMR (100 MHz,  $\text{CDCl}_3$ ) of **5d**

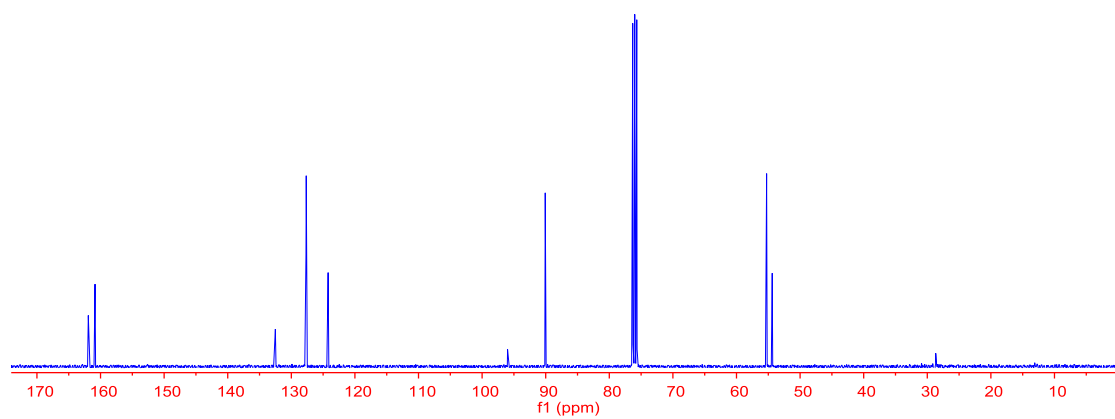

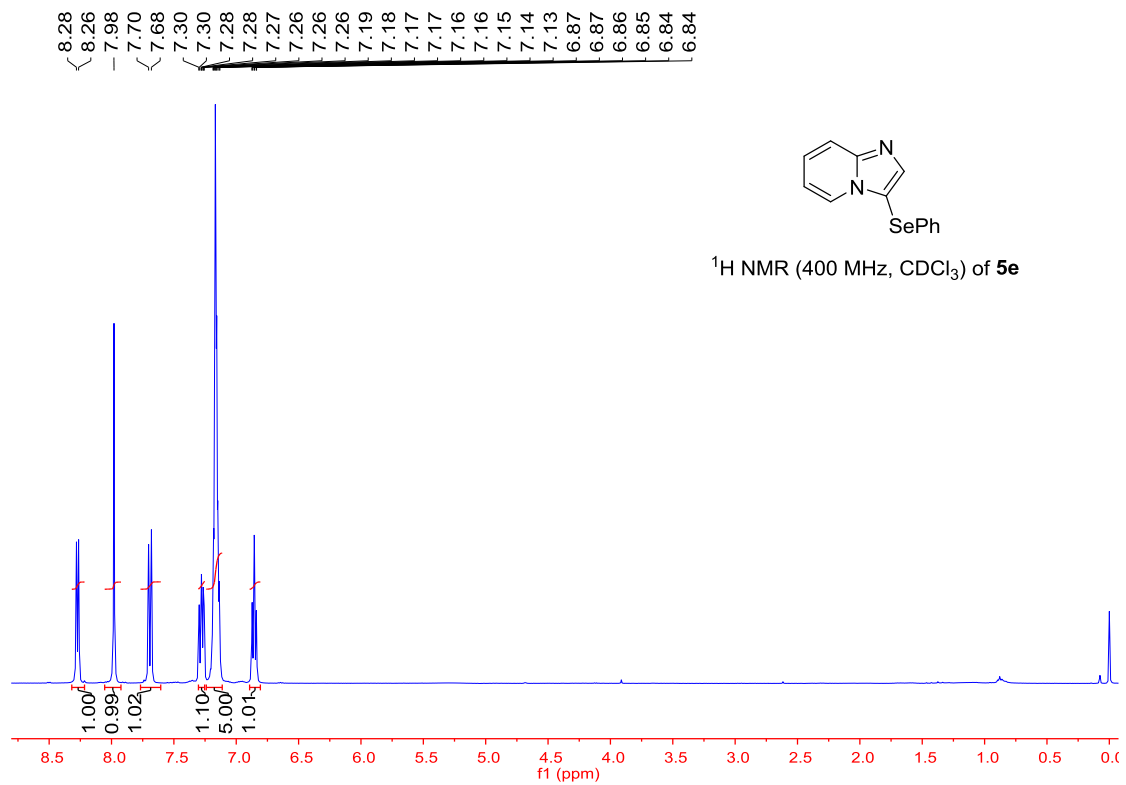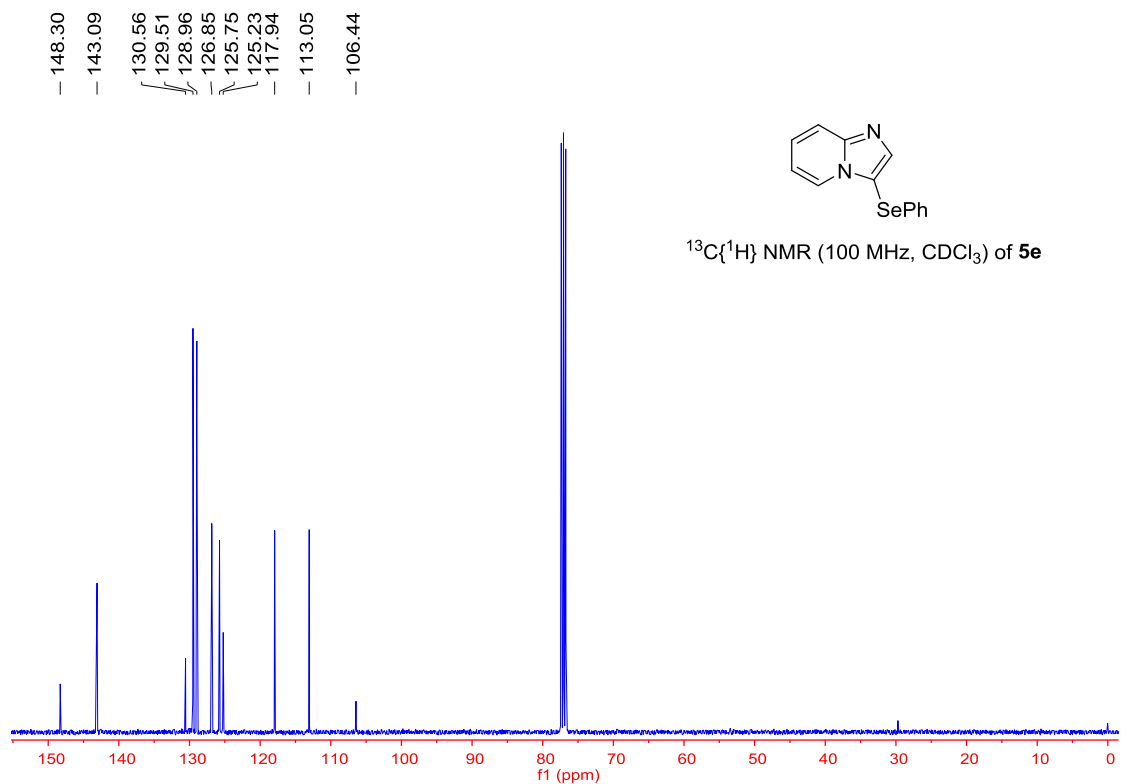

8.28  
8.28  
8.26  
8.25  
7.88  
7.86  
7.79  
7.79  
7.77  
7.77  
7.50  
7.49  
7.48  
7.48  
7.47  
7.46  
7.46  
7.37  
7.36  
7.36  
7.35  
7.35  
7.34  
7.34  
7.33  
7.33  
7.33  
7.15  
7.14  
7.14  
7.14  
7.13  
7.12  
7.11  
7.11  
7.10

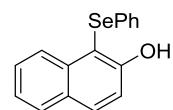

$^1\text{H}$  NMR (400 MHz,  $\text{CDCl}_3$ ) of **5f**

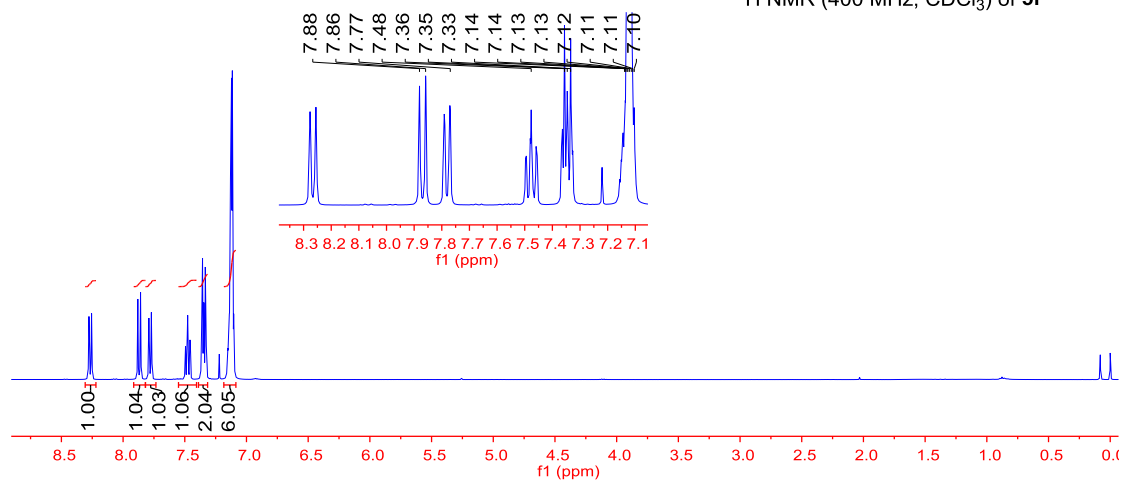

156.25  
135.83  
132.82  
130.58  
129.48  
129.09  
128.51  
127.96  
126.95  
126.62  
123.81  
116.60  
109.01

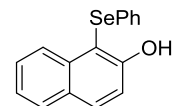

$^{13}\text{C}\{^1\text{H}\}$  NMR (100 MHz,  $\text{CDCl}_3$ ) of **5f**

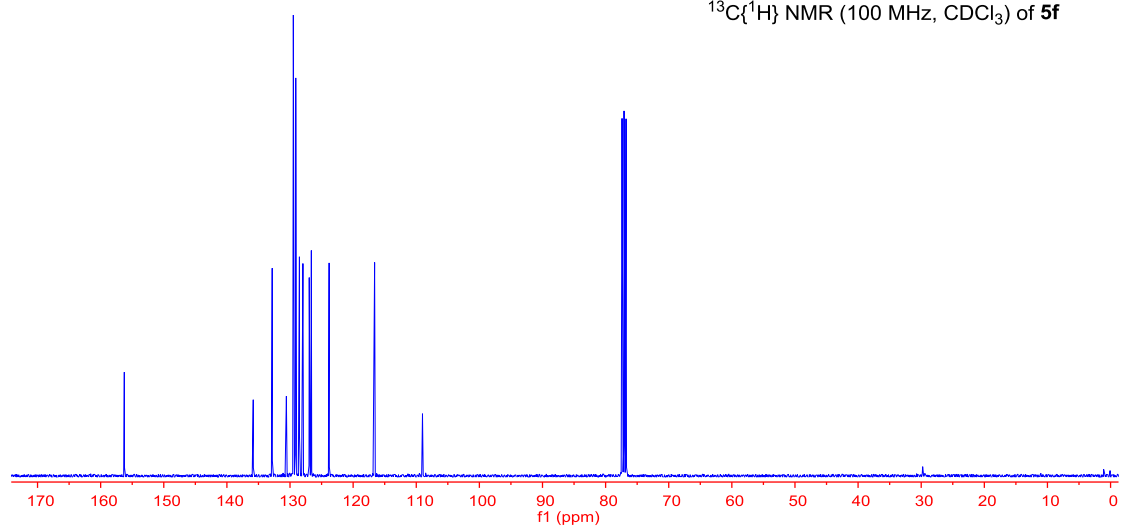

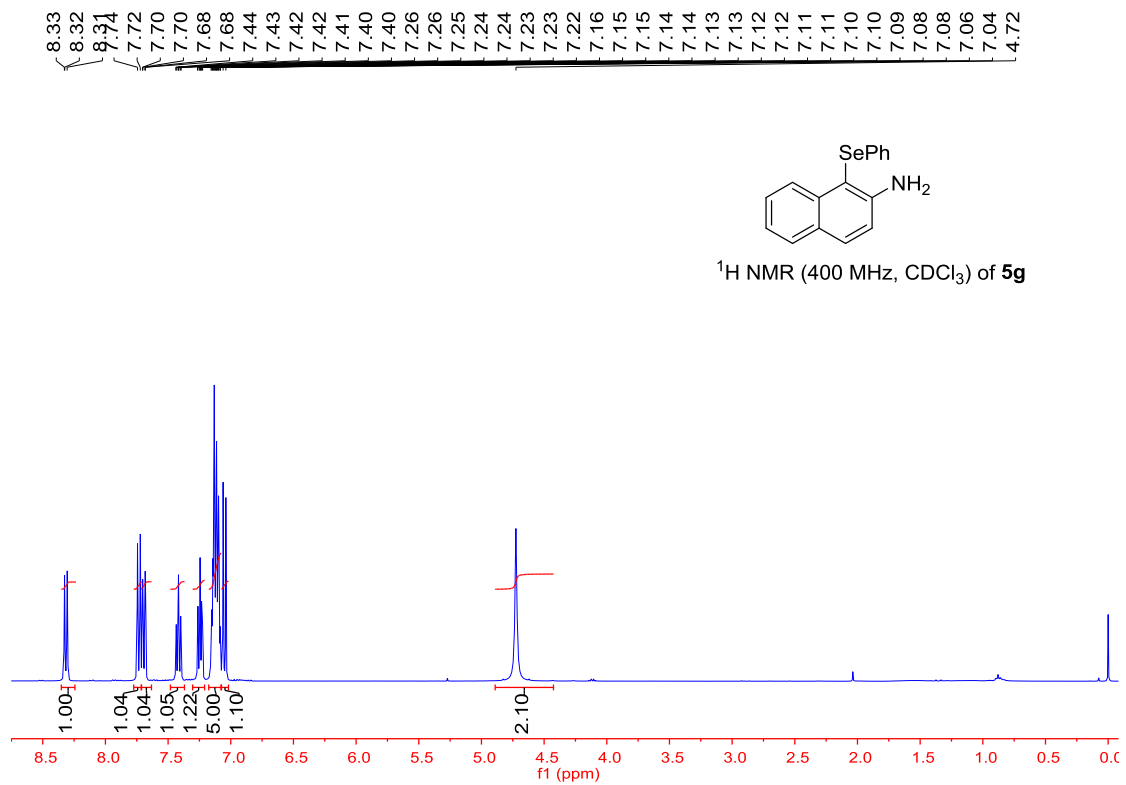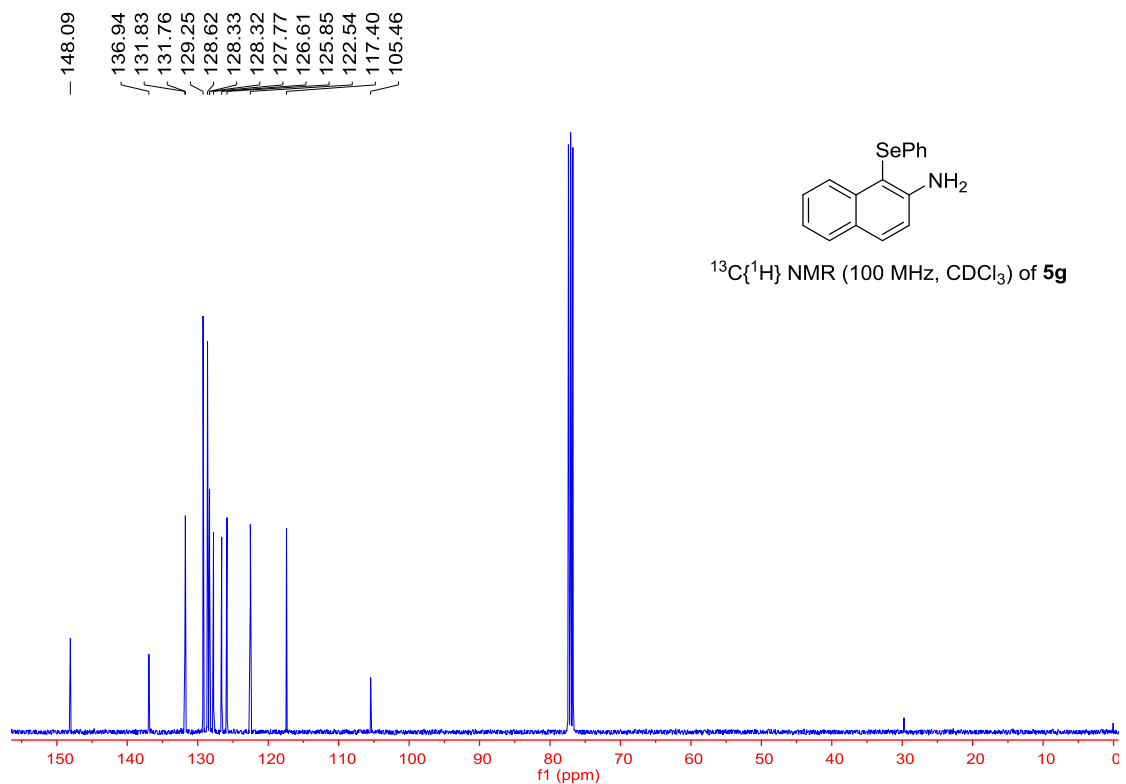

7.33  
7.33  
7.32  
7.31  
7.29  
7.29  
7.28  
7.28  
7.27  
7.27  
7.26  
7.25  
7.23  
7.22  
7.22  
7.20  
7.19  
7.18  
7.16  
7.14  
7.14  
7.14  
7.13  
7.12  
7.12  
7.11  
7.11  
7.10  
6.42  
6.40  
3.96  
3.96  
3.33  
3.32  
3.30  
2.75  
2.73  
2.71  
1.95  
1.94  
1.93  
1.92  
1.91  
1.90

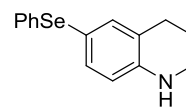

$^1\text{H}$  NMR (400 MHz,  $\text{CDCl}_3$ ) of **5h**

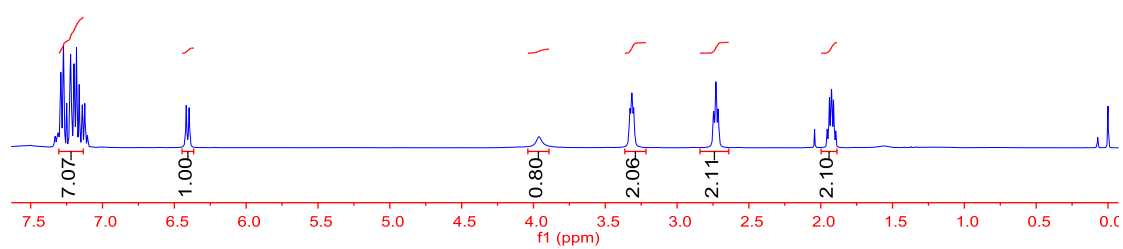

- 145.21  
137.40  
134.92  
134.75  
129.71  
128.97  
125.75  
122.39  
- 114.83

- 41.81  
- 26.84  
- 21.72

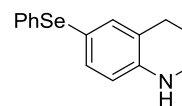

$^{13}\text{C}\{^1\text{H}\}$  NMR (100 MHz,  $\text{CDCl}_3$ ) of **5h**

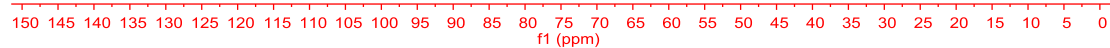

7.58  
7.57  
7.57  
7.56  
7.55  
7.55  
7.41  
7.40  
7.40  
7.39  
7.39  
7.38  
7.38  
7.37  
7.36  
7.35  
7.35  
7.30  
7.30  
7.29  
7.28  
7.26  
7.26  
7.24  
7.23  
7.23  
7.22  
7.21  
7.21  
7.20

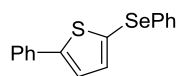

$^1\text{H}$  NMR (400 MHz,  $\text{CDCl}_3$ ) of **5i**

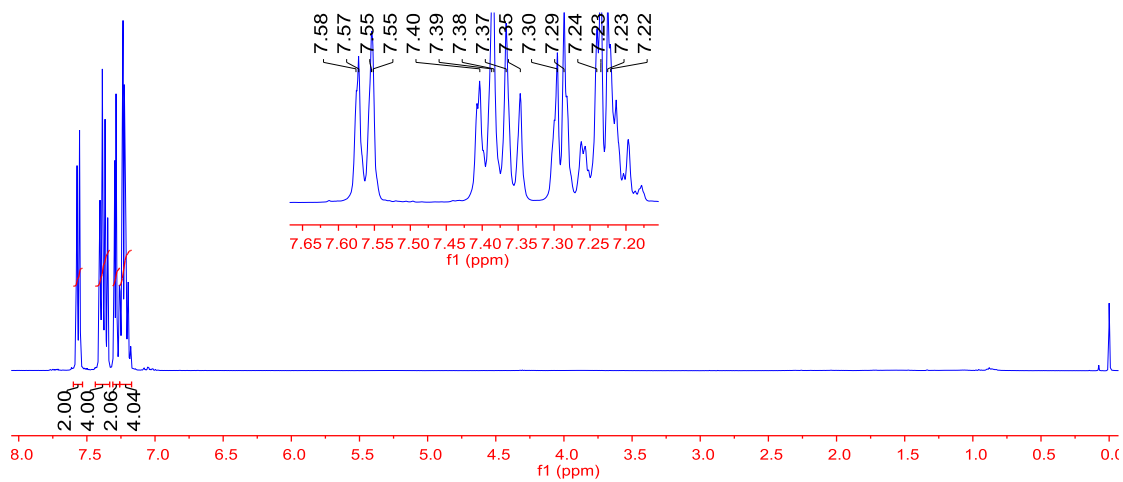

150.80  
138.03  
133.75  
133.41  
130.04  
129.32  
129.01  
128.01  
126.86  
125.86  
124.07  
122.56

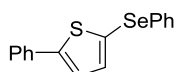

$^{13}\text{C}\{^1\text{H}\}$  NMR (100 MHz,  $\text{CDCl}_3$ ) of **5i**

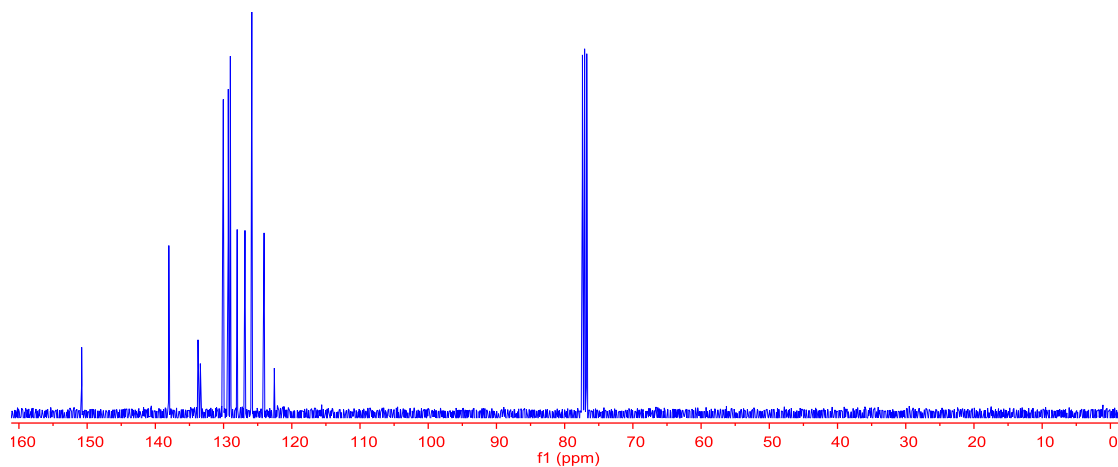

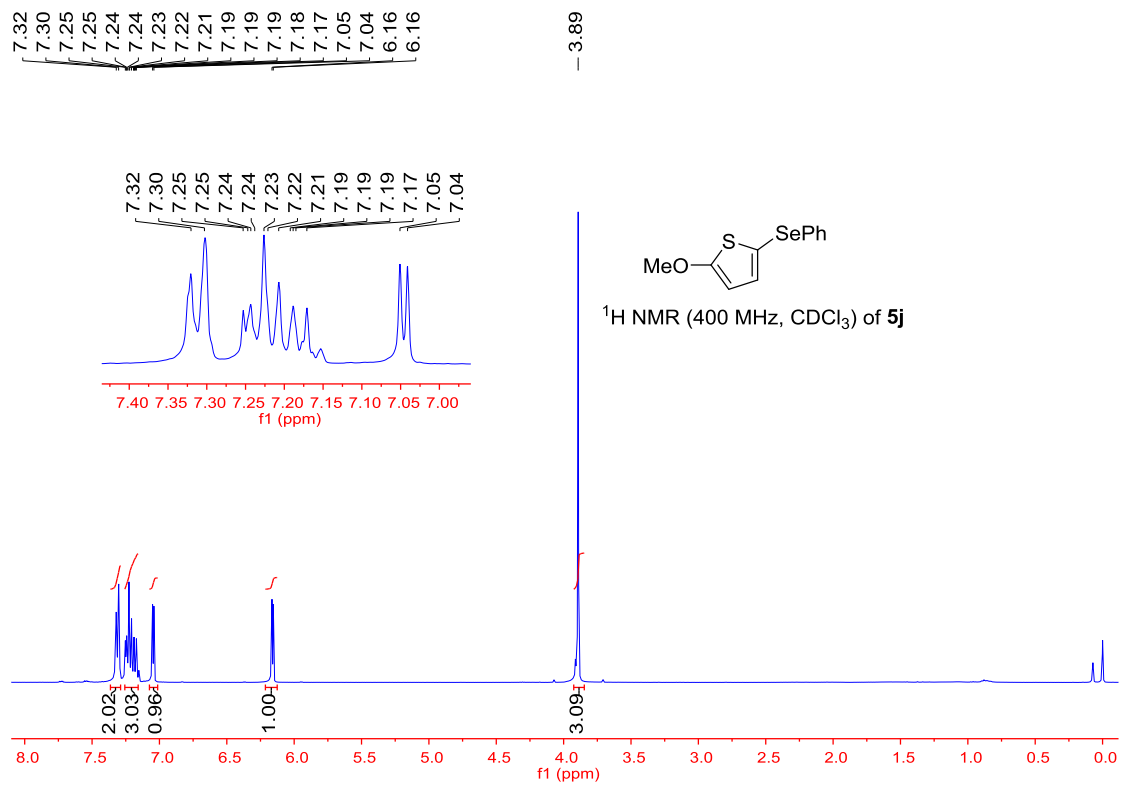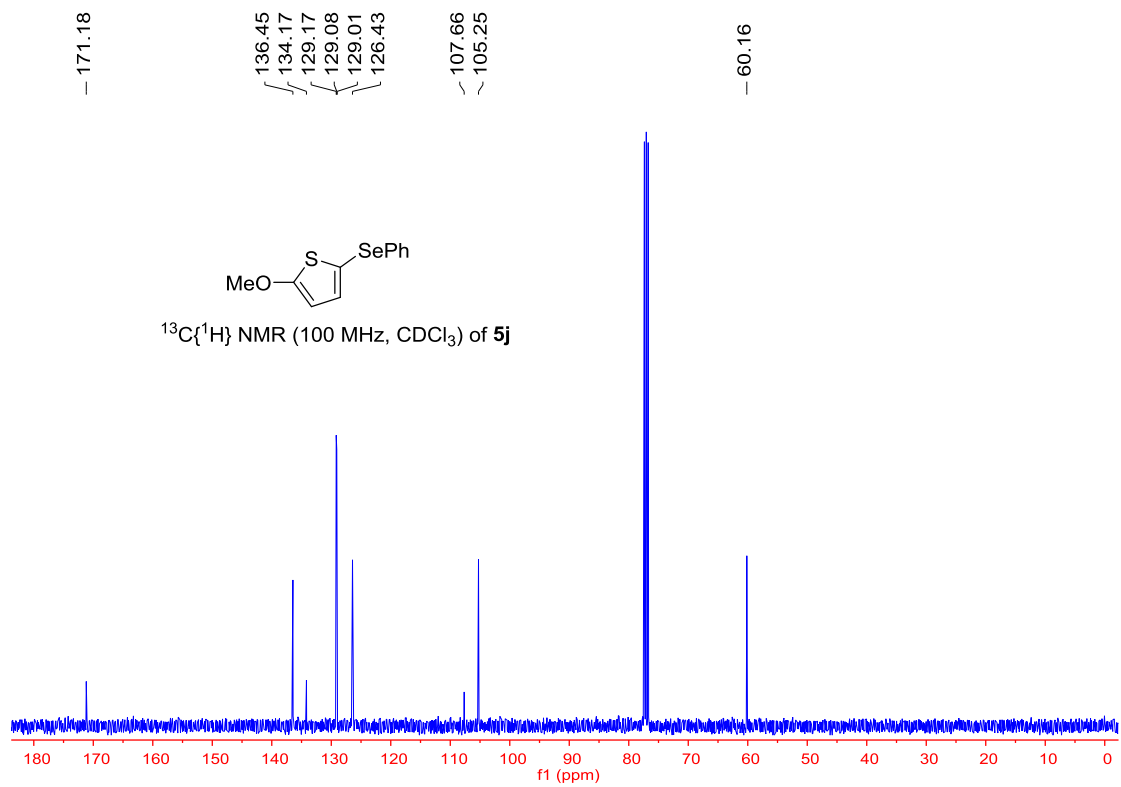



8.68  
7.75  
7.74  
7.73  
7.47  
7.47  
7.43  
7.42  
7.42  
7.41  
7.32  
7.31  
7.30  
7.29  
7.28

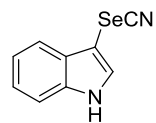

$^1\text{H}$  NMR (400 MHz,  $\text{CDCl}_3$ ) of **6a**

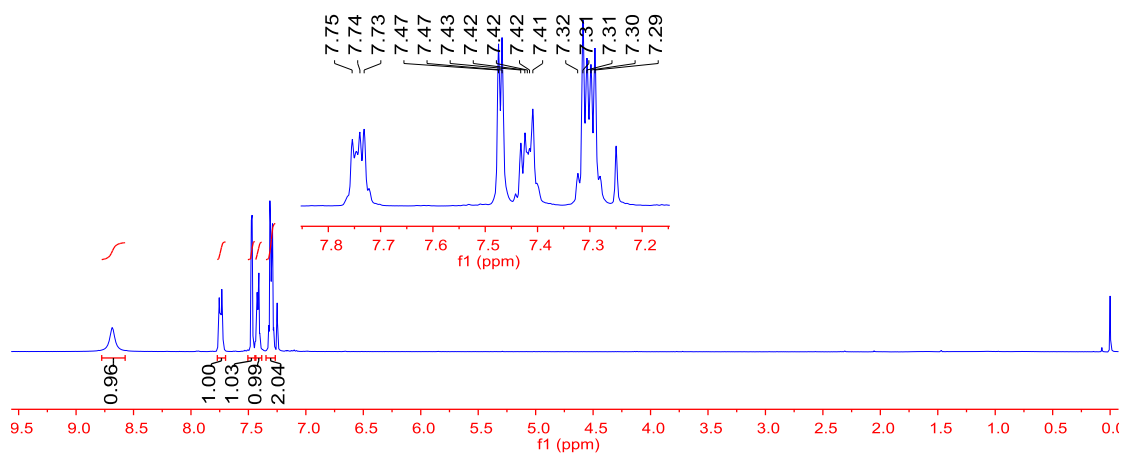

136.01  
131.82  
128.72  
123.79  
121.86  
119.58  
111.91  
101.94  
89.52

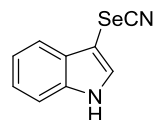

$^{13}\text{C}\{^1\text{H}\}$  NMR (100 MHz,  $\text{CDCl}_3$ ) of **6a**

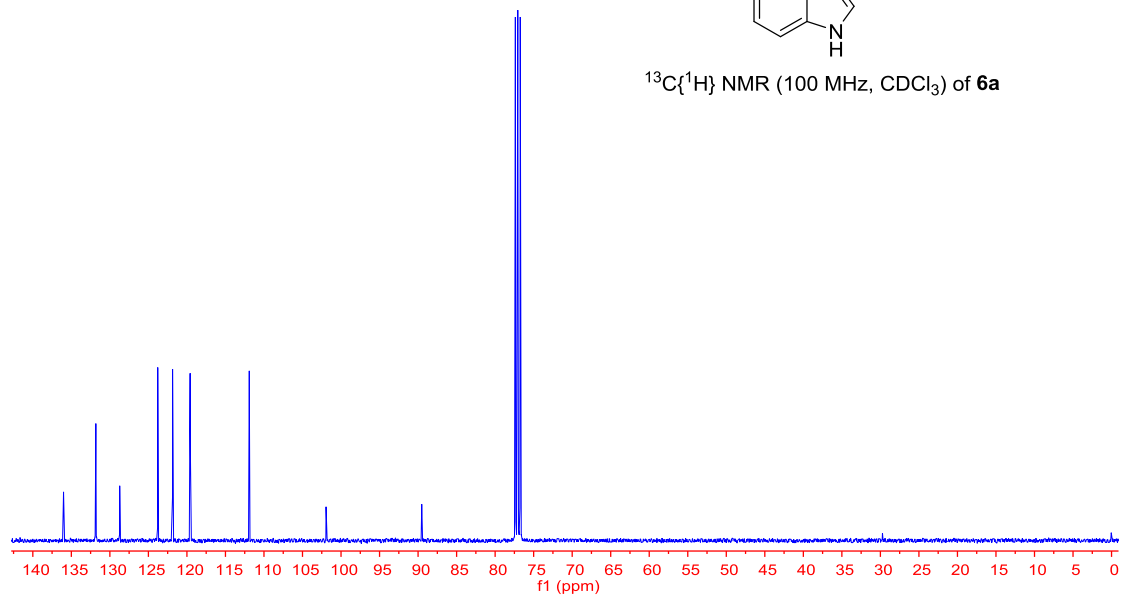

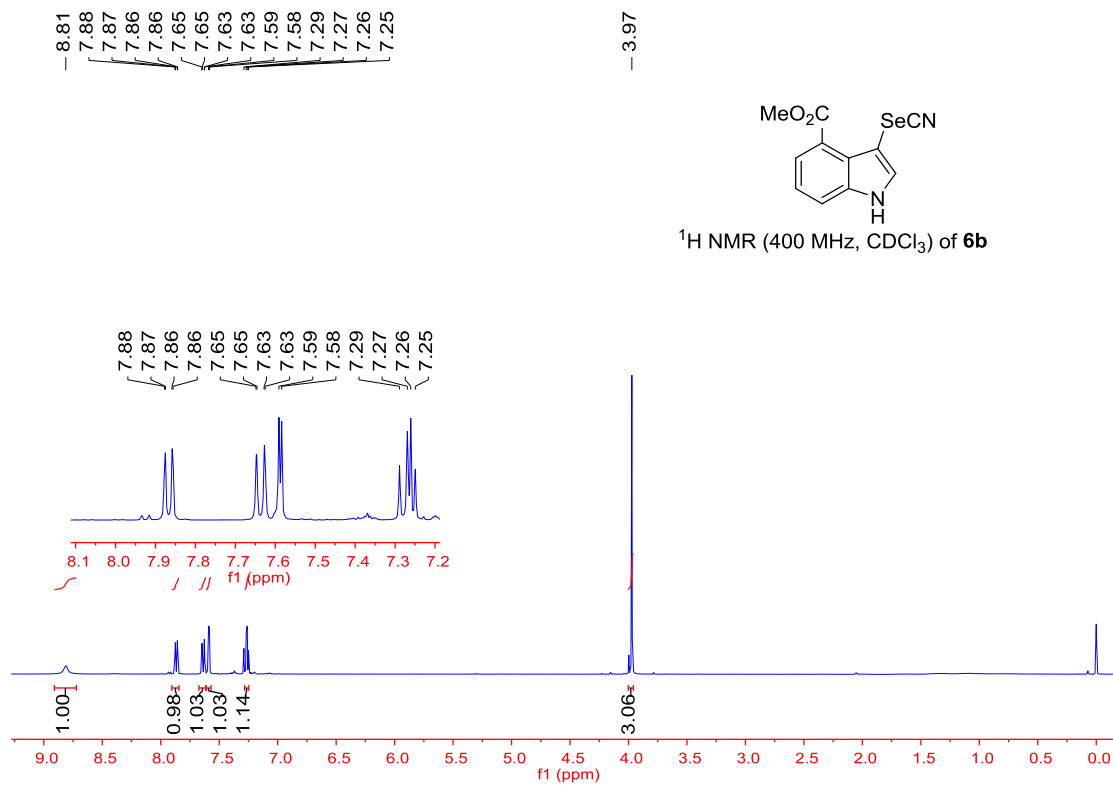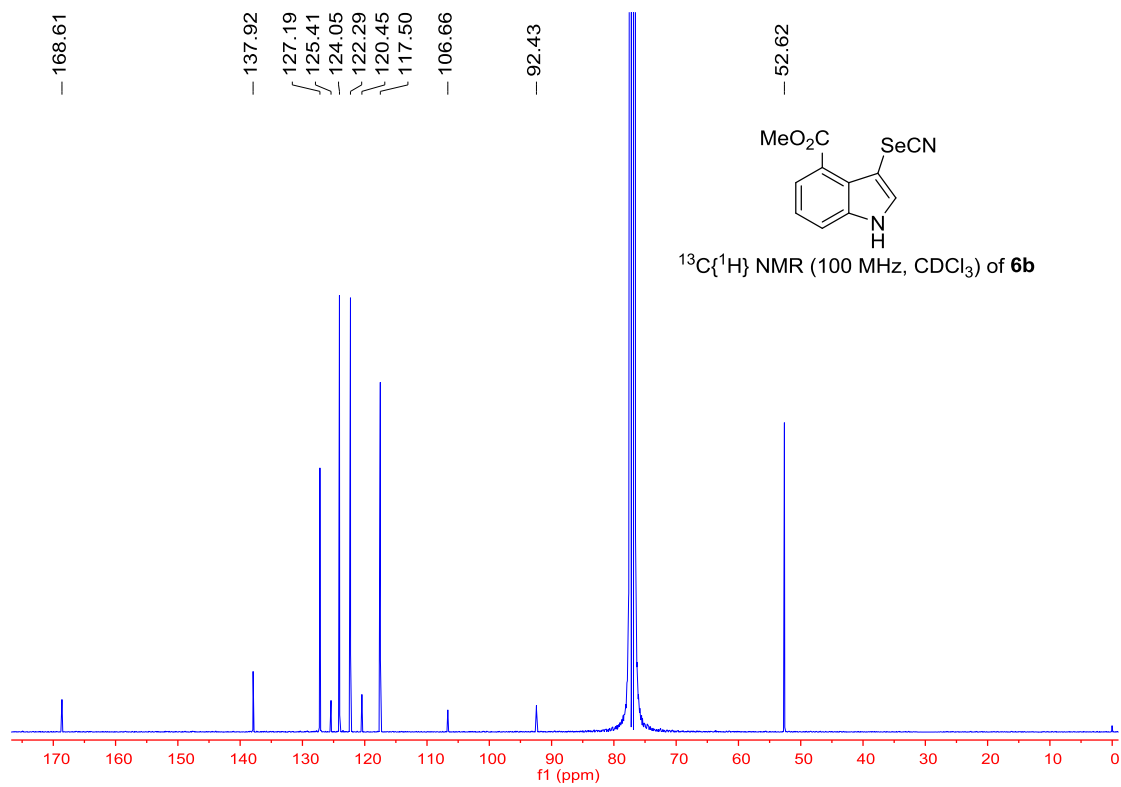

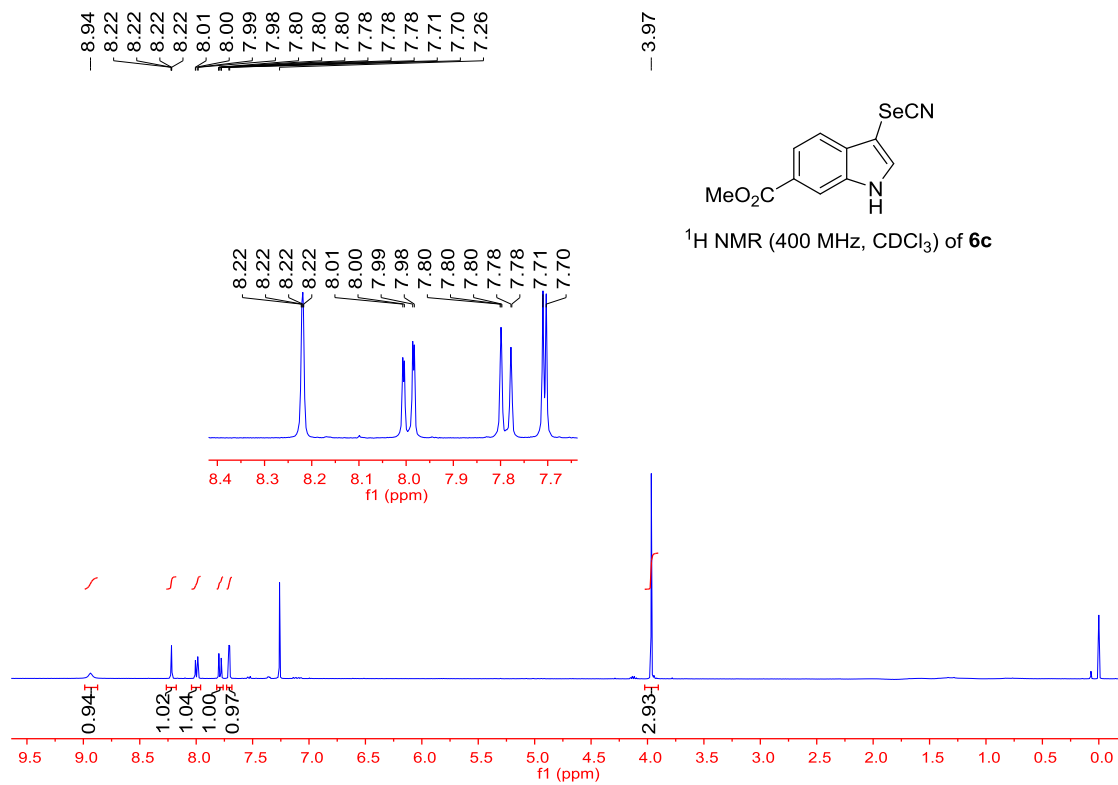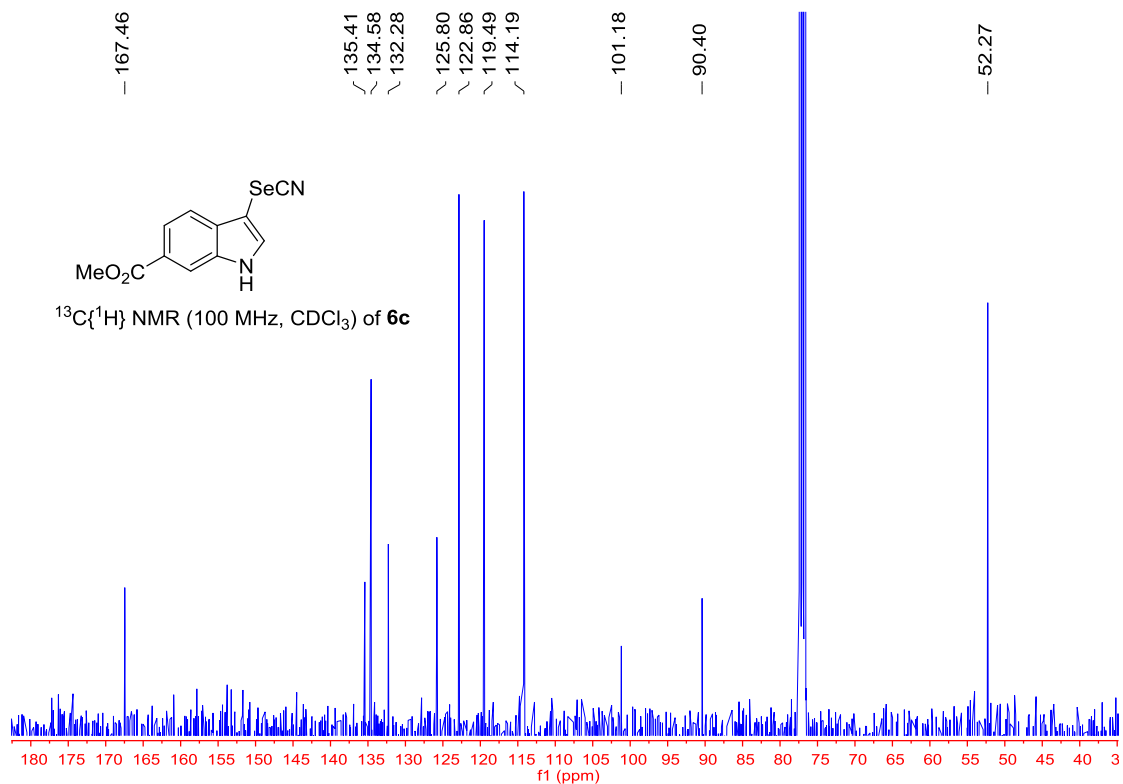

- 10.69

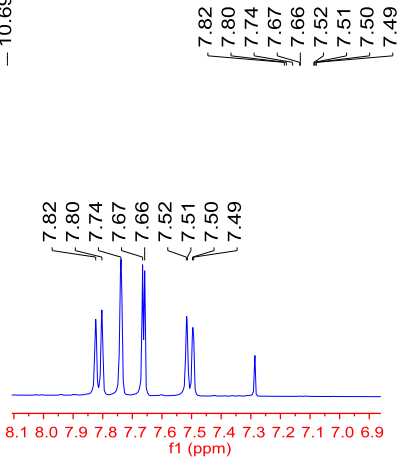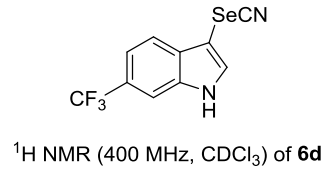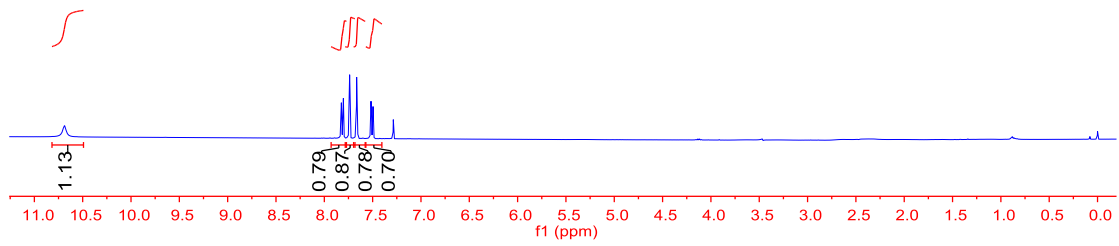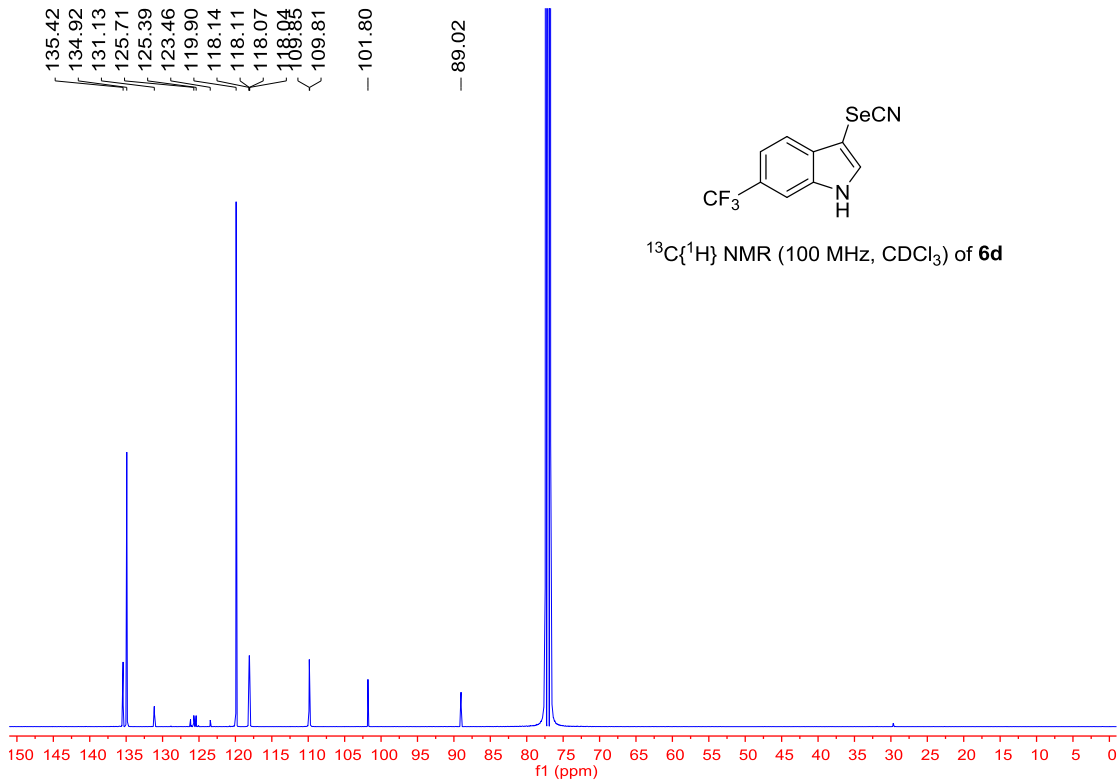

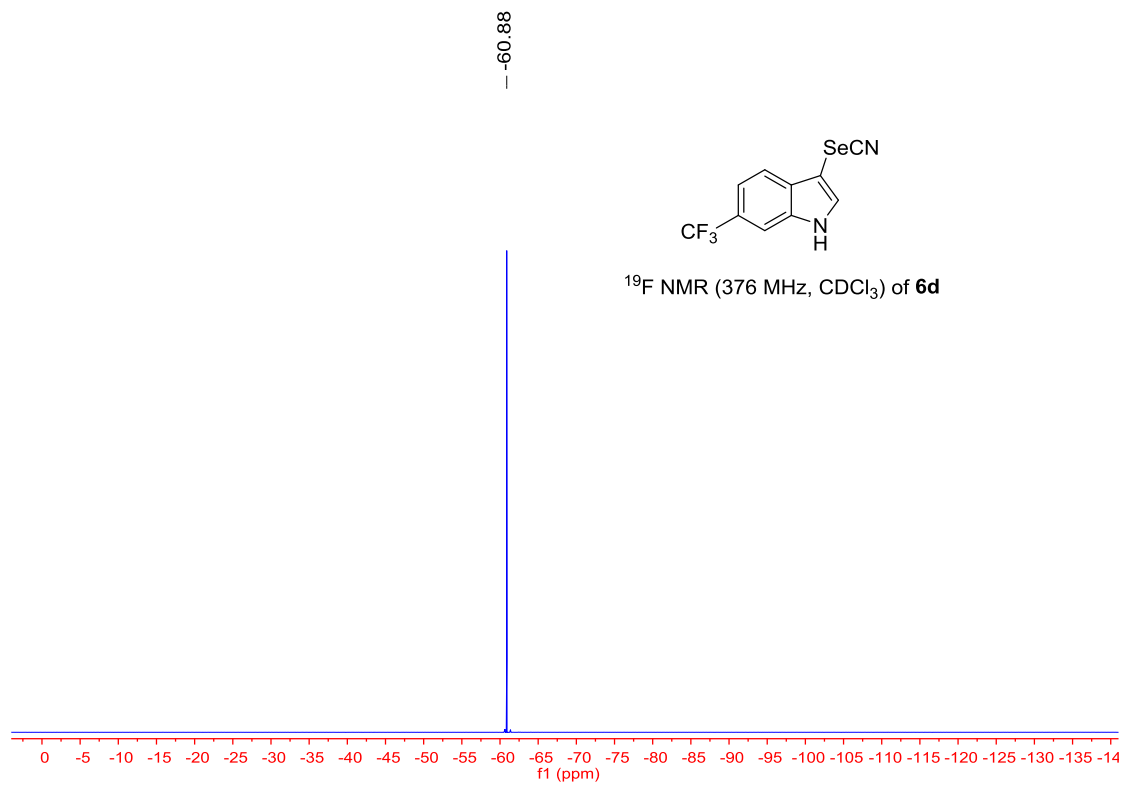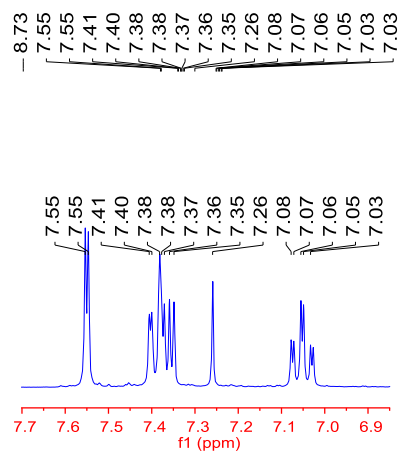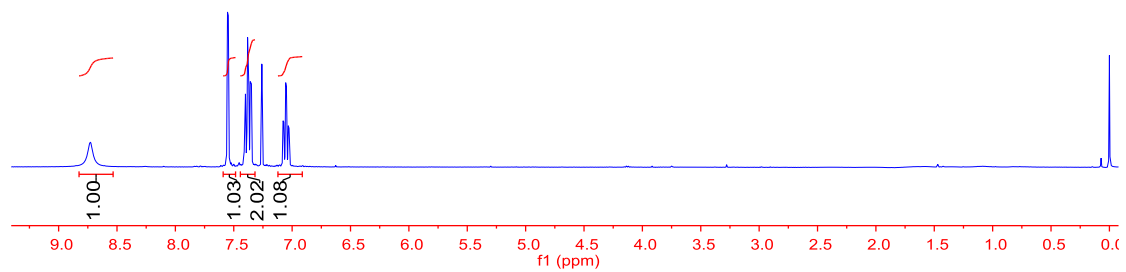

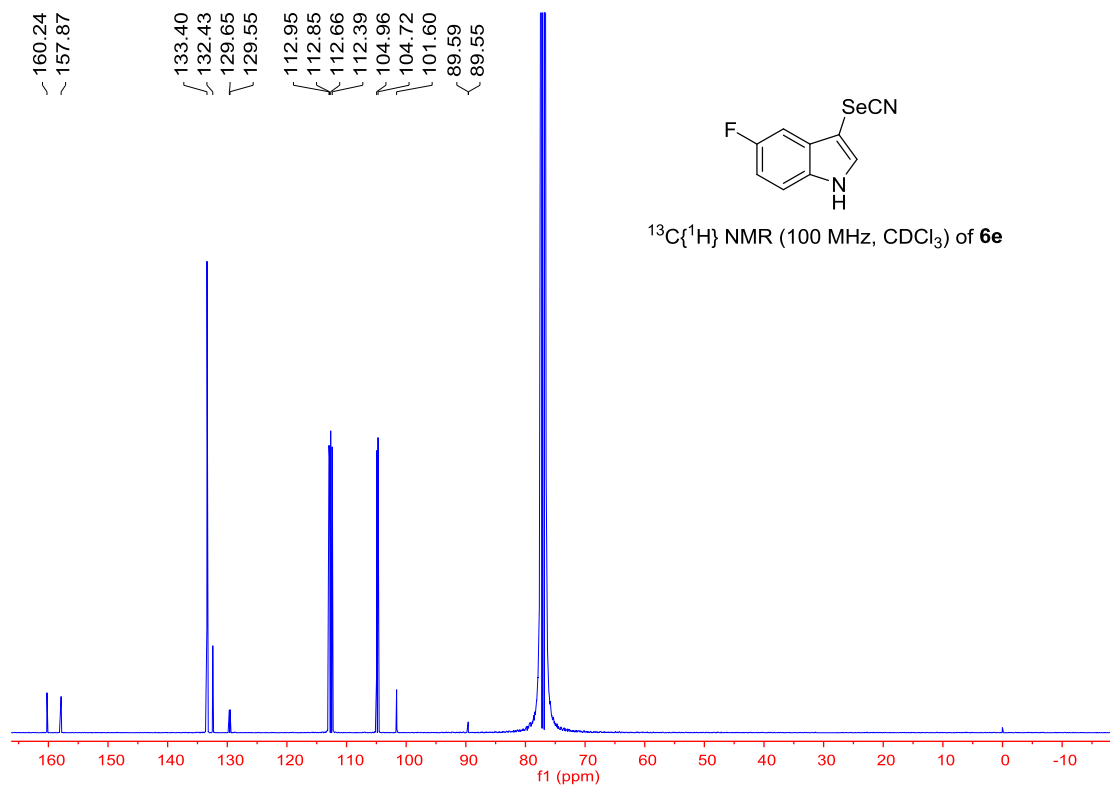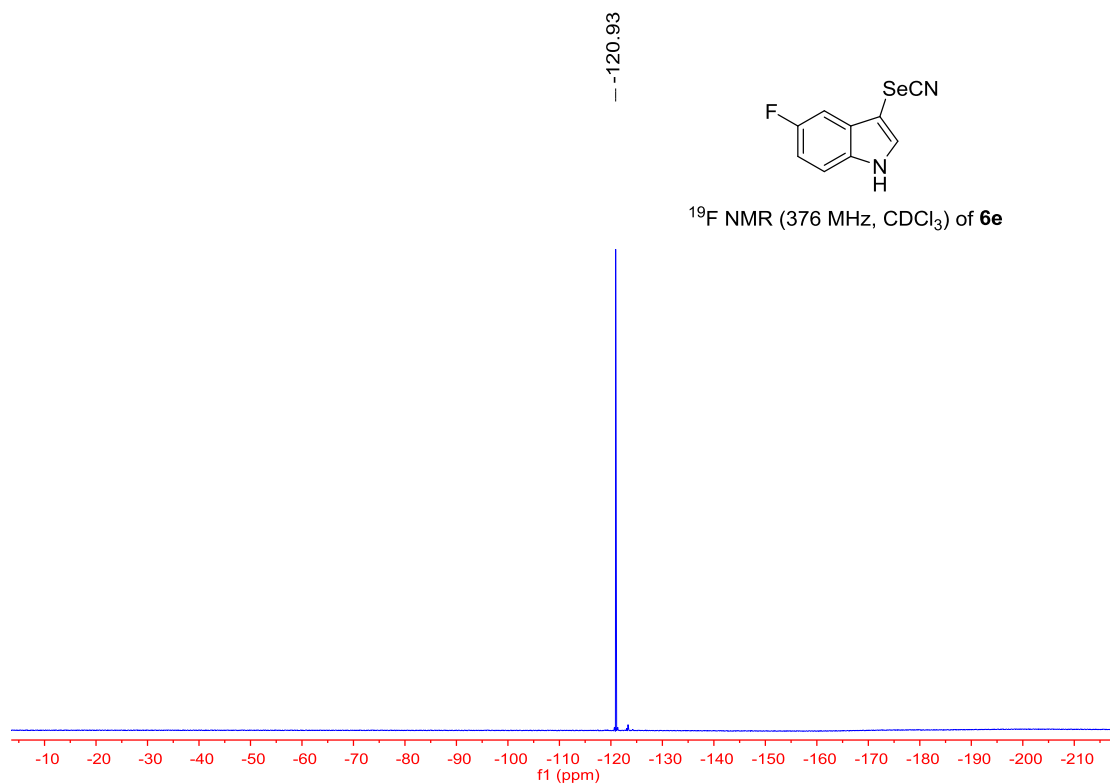

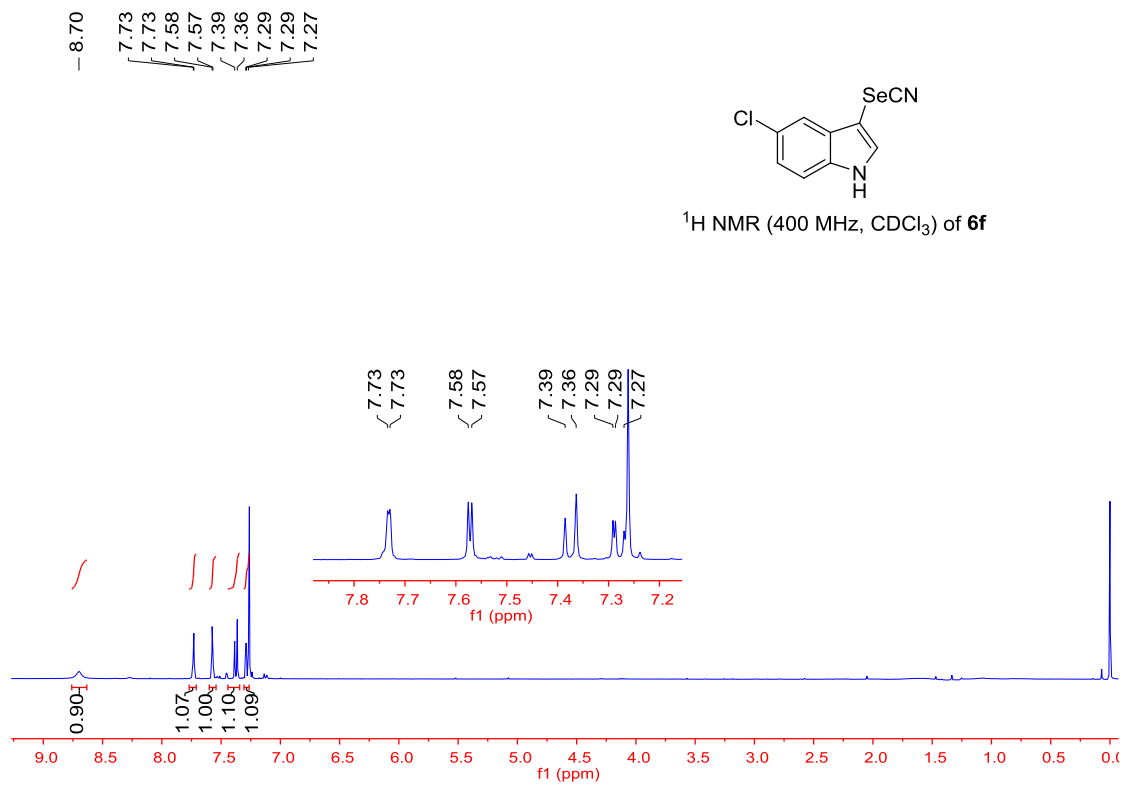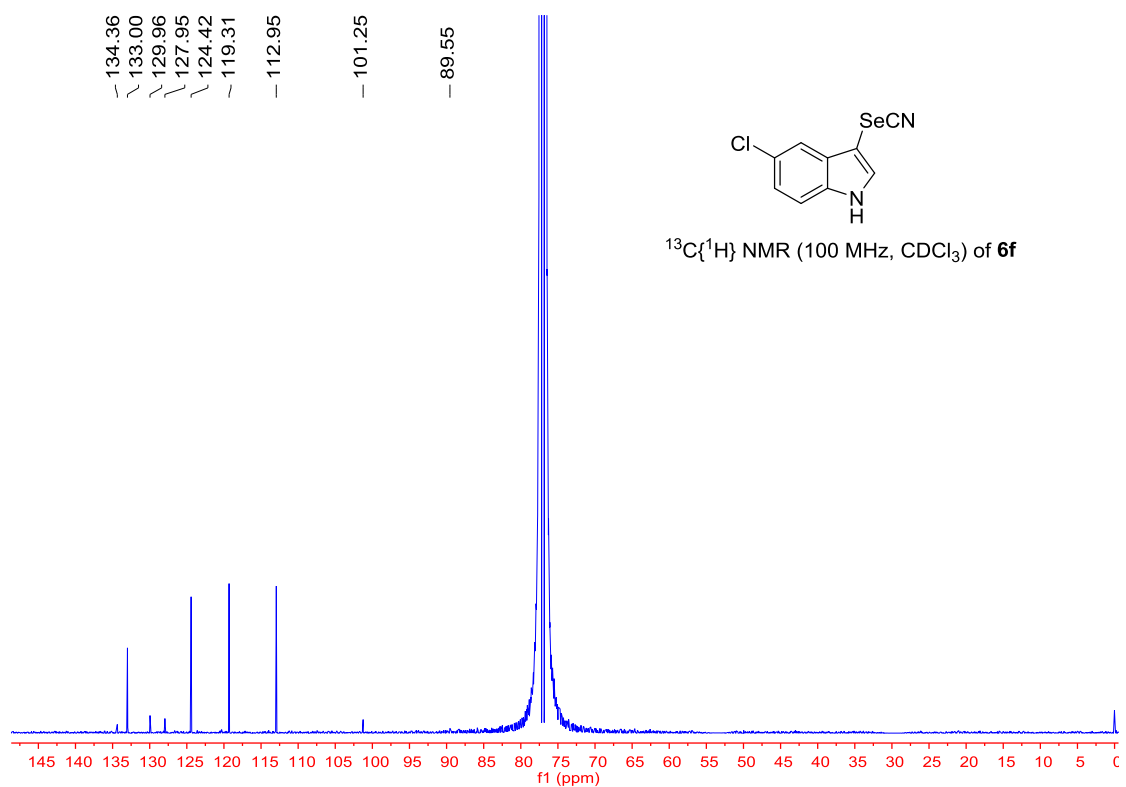

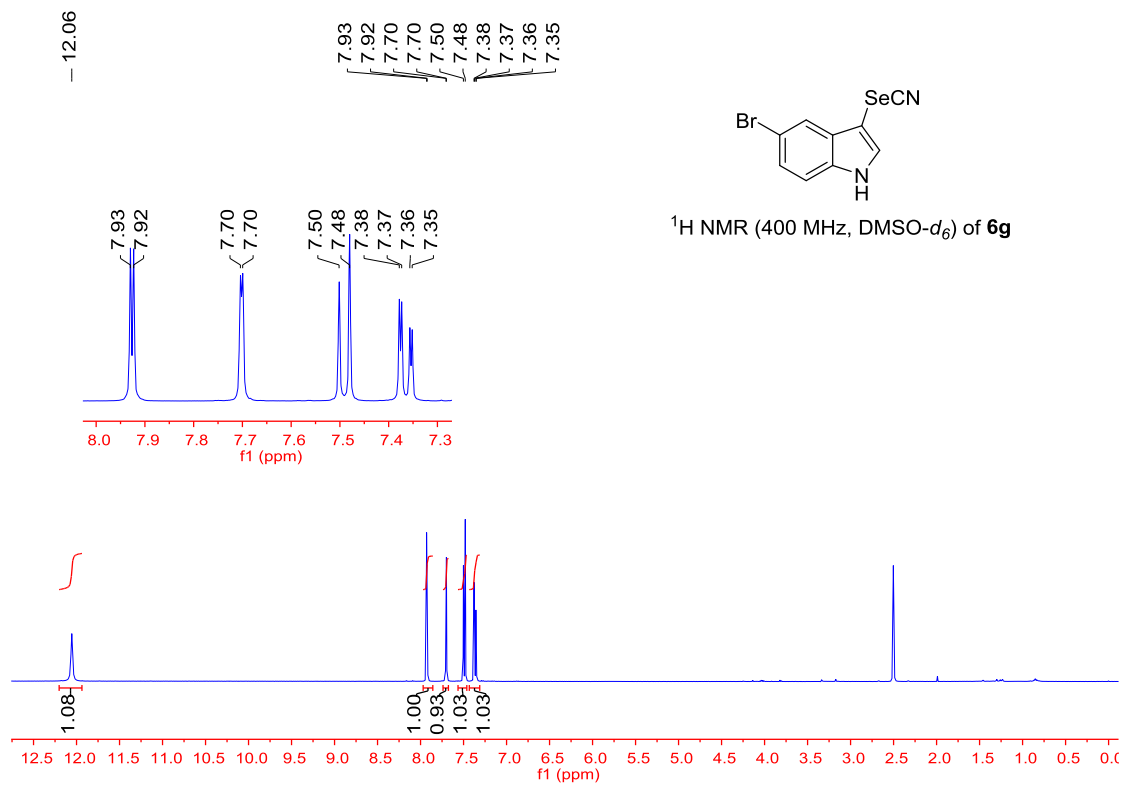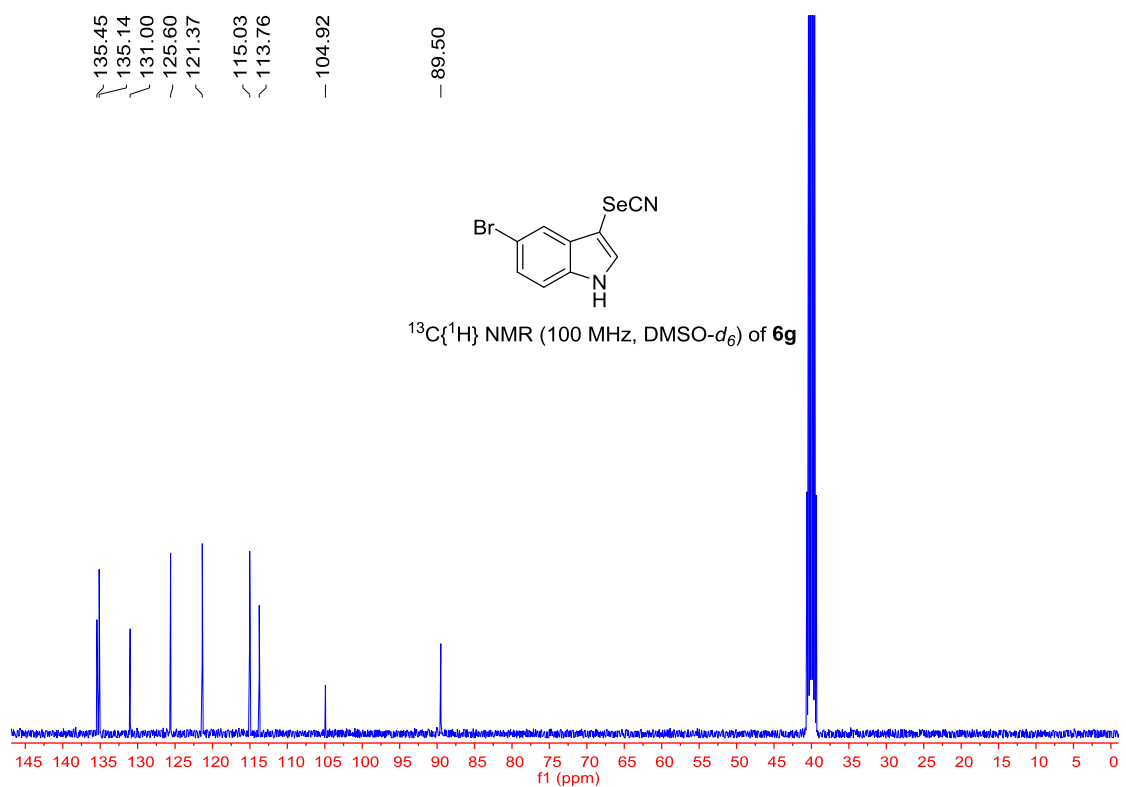



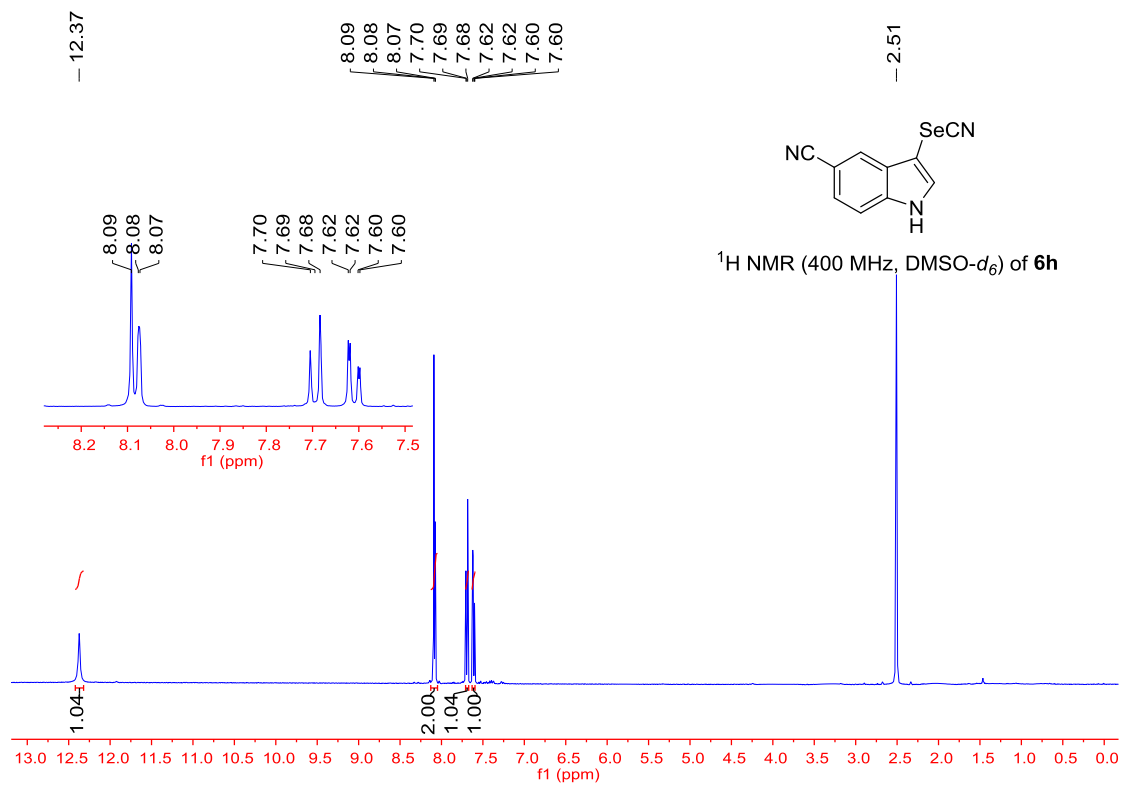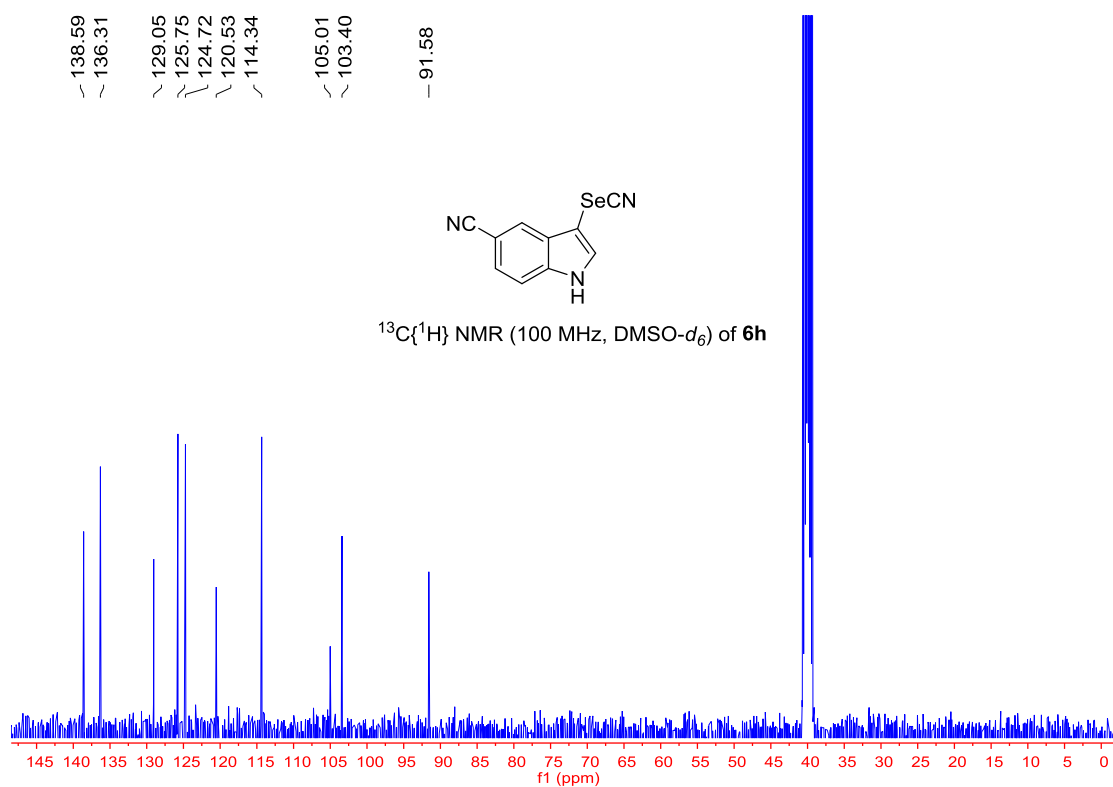

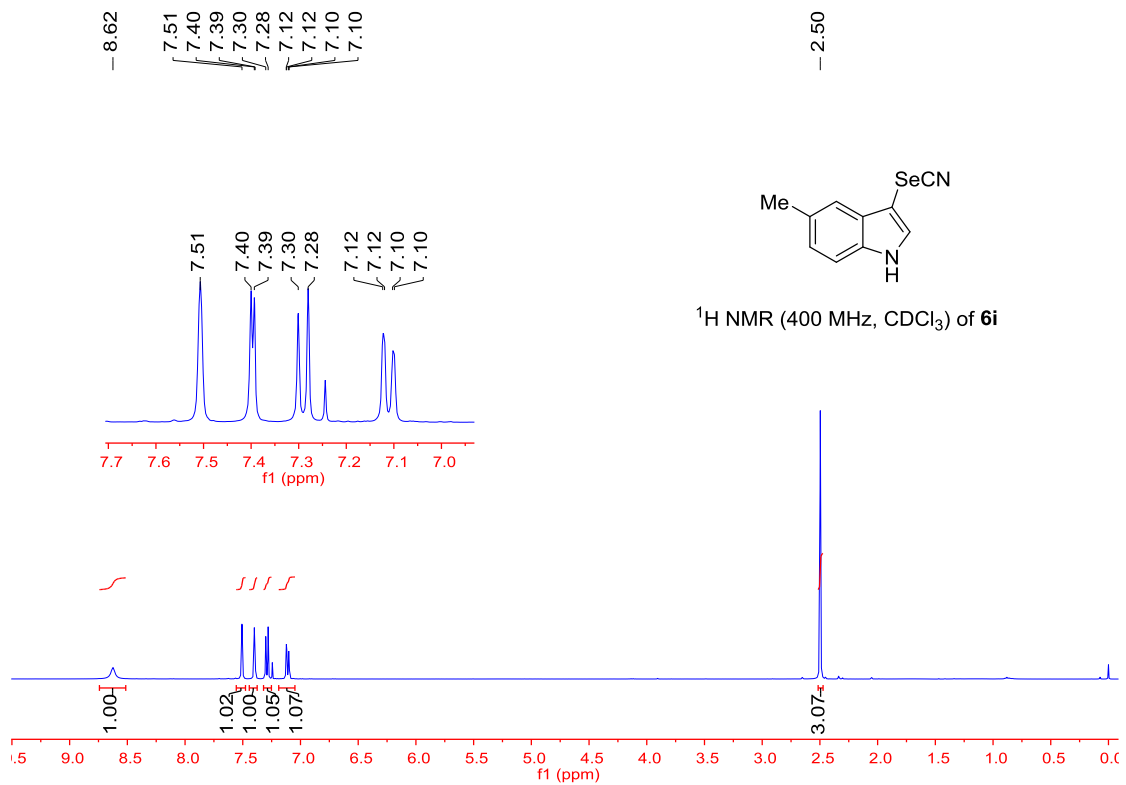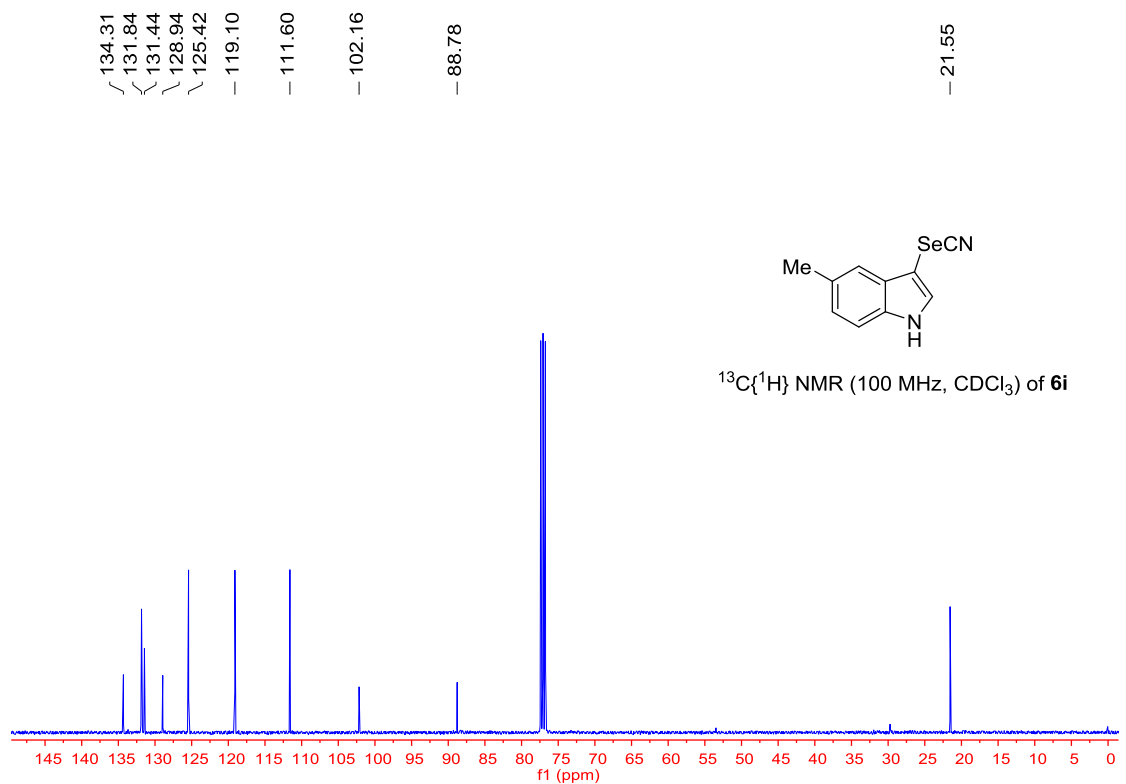

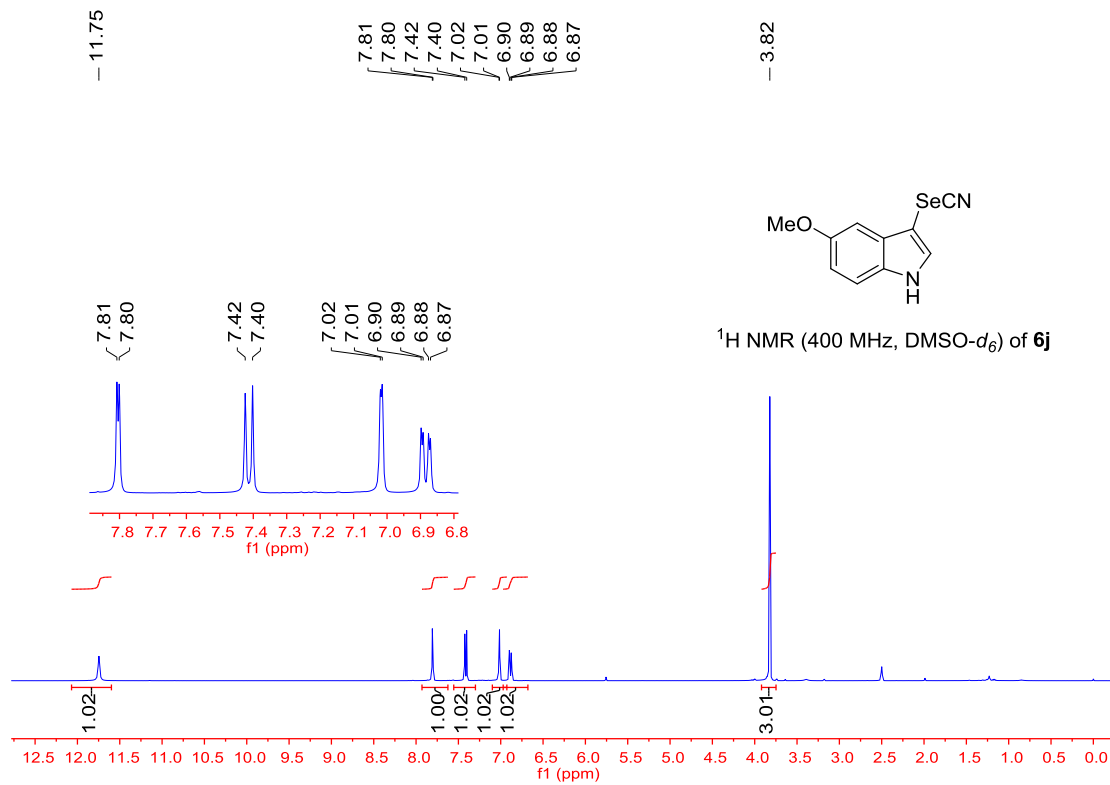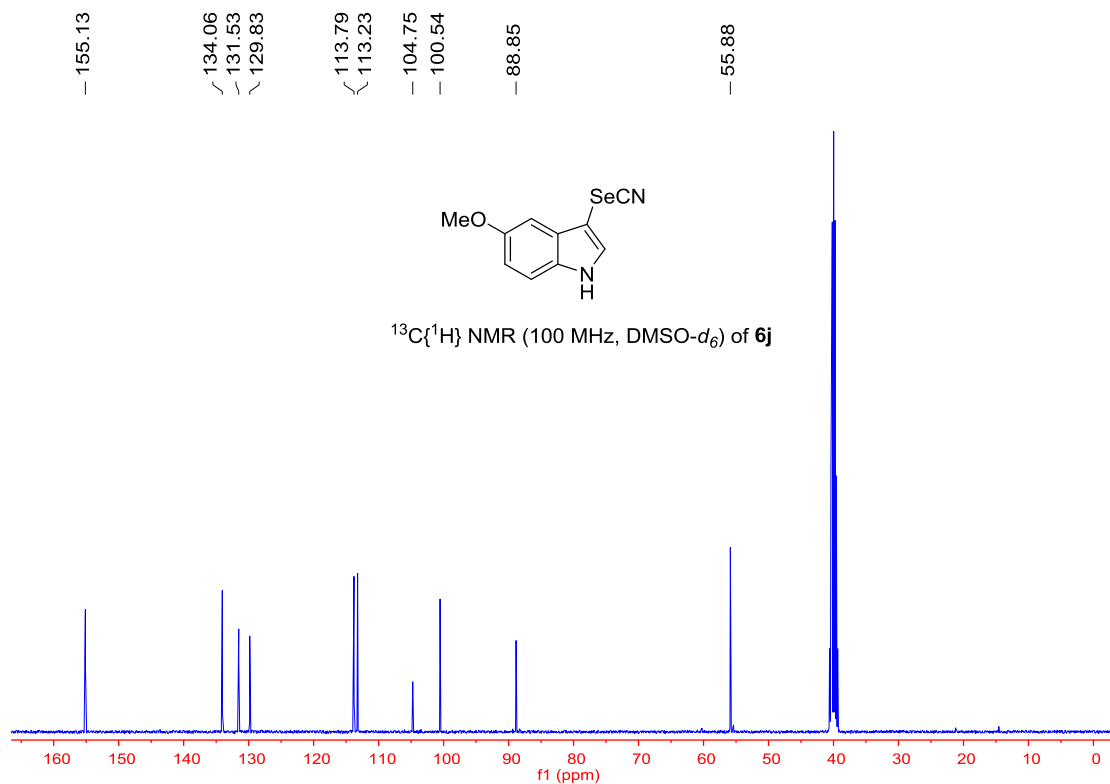

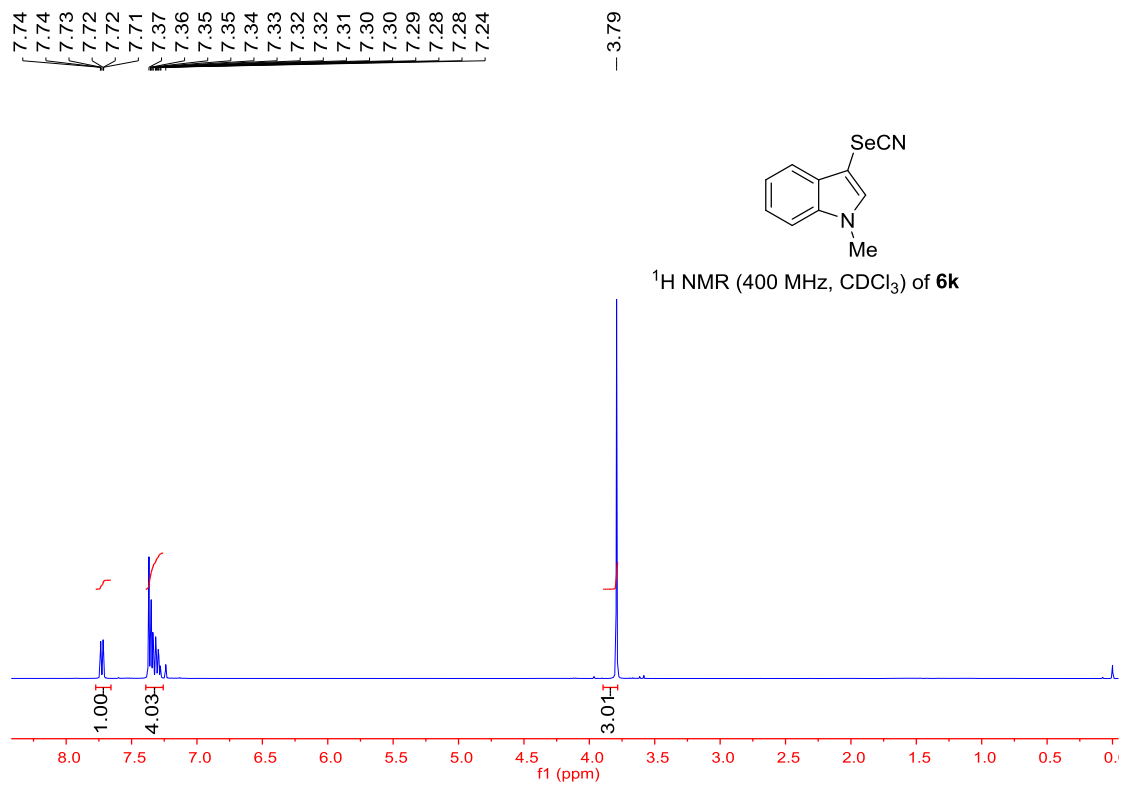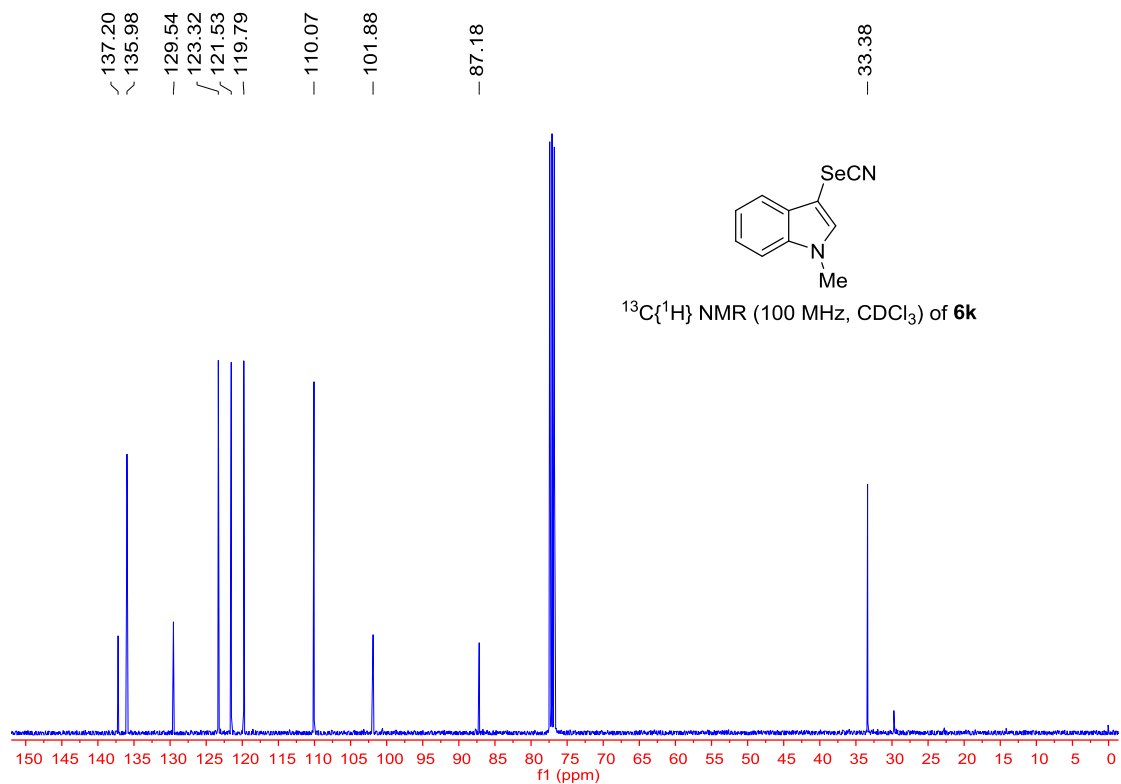

7.76  
7.75  
7.75  
7.74  
7.73  
7.34  
7.33  
7.33  
7.32  
7.31  
7.30  
7.30  
7.29  
7.28  
7.27  
7.27  
7.14  
7.13  
7.12  
7.11  
5.29

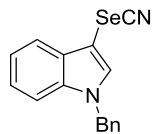

$^1\text{H}$  NMR (400 MHz,  $\text{CDCl}_3$ ) of **6I**

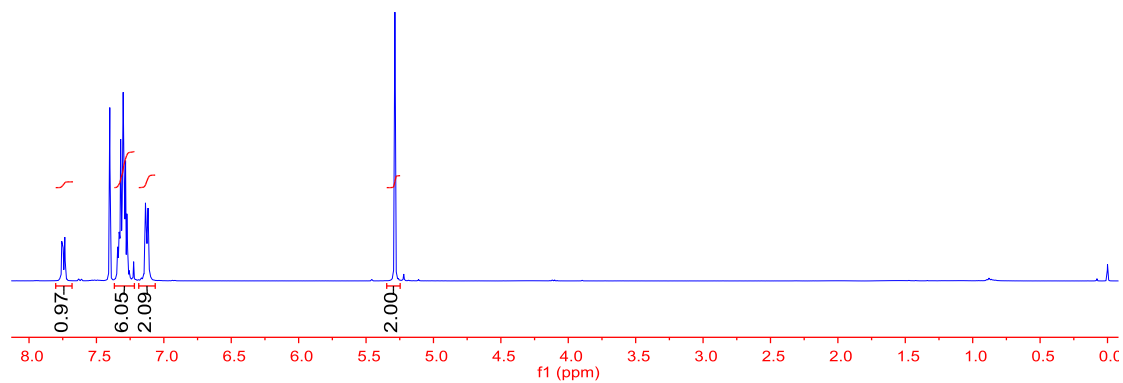

136.83  
135.88  
135.22  
129.74  
129.09  
128.28  
127.16  
123.55  
121.77  
119.98  
110.59  
101.77  
88.21  
50.70

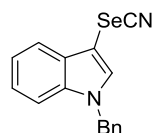

$^{13}\text{C}\{^1\text{H}\}$  NMR (100 MHz,  $\text{CDCl}_3$ ) of **6I**

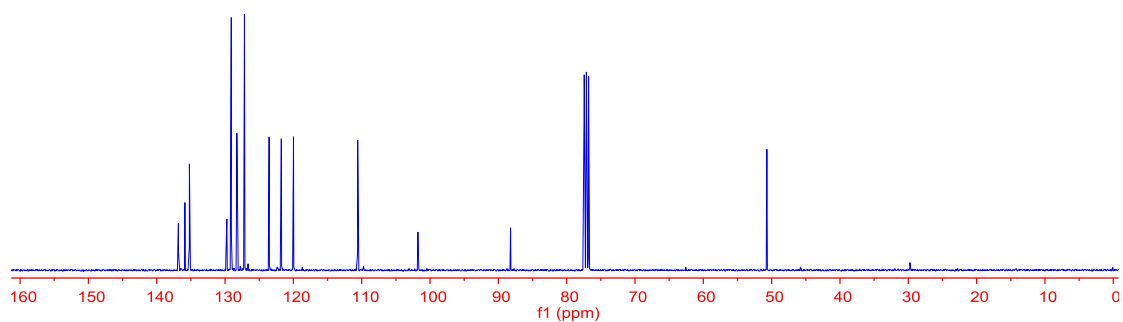

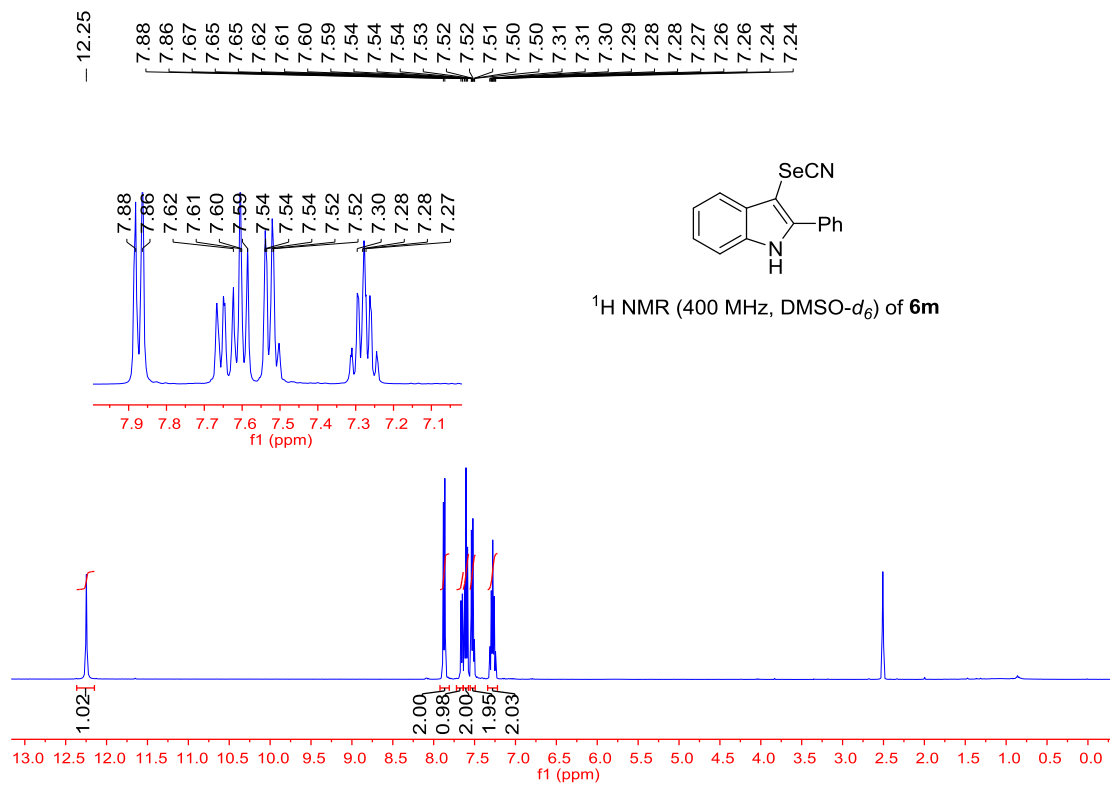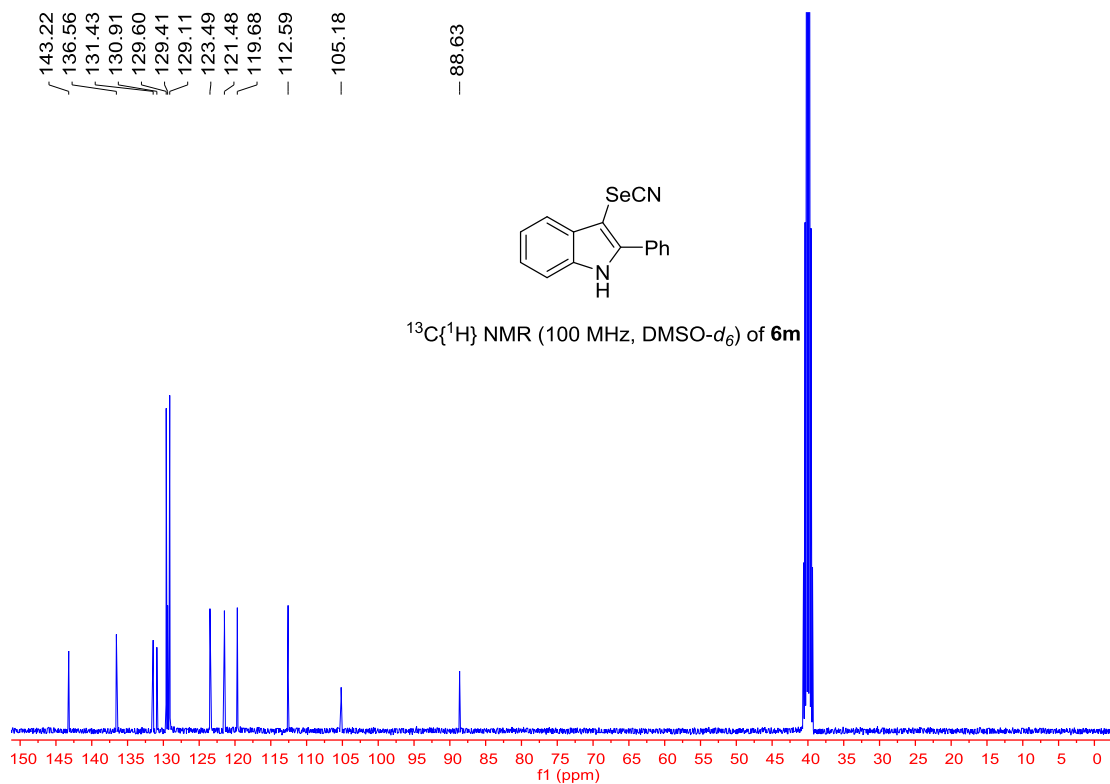

7.51  
7.49

6.73  
6.71

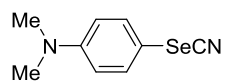

$^1\text{H}$  NMR (400 MHz,  $\text{DMSO-}d_6$ ) of **6n**

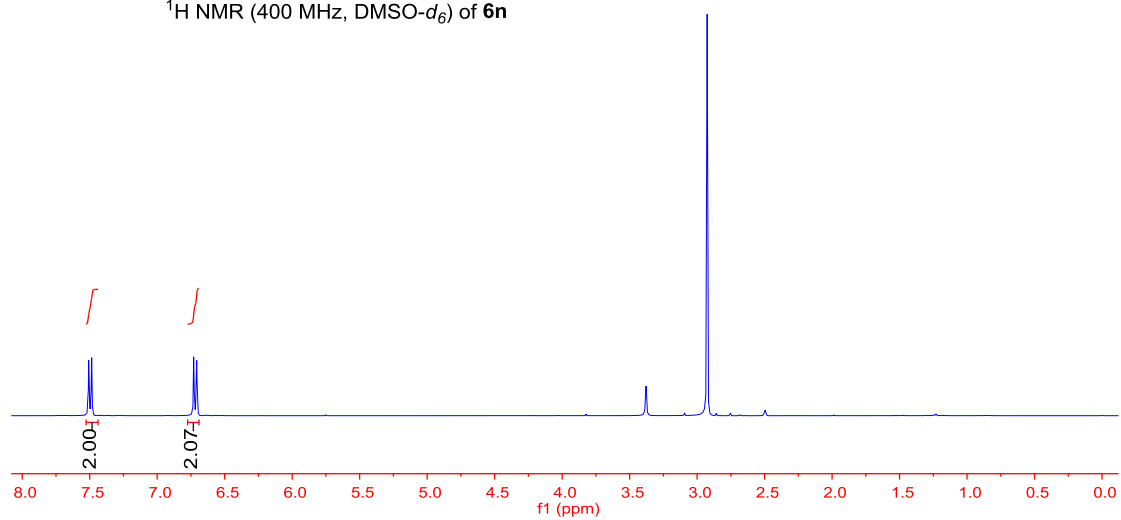

151.62

136.54  
136.49

113.71

106.45  
105.86

40.18

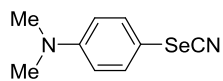

$^{13}\text{C}\{^1\text{H}\}$  NMR (100 MHz,  $\text{DMSO-}d_6$ ) of **6n**

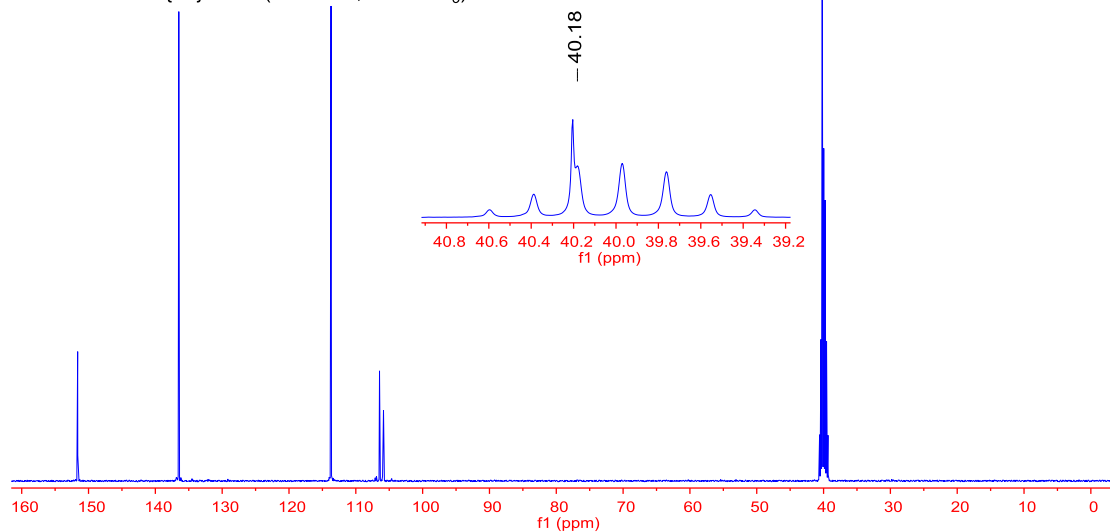

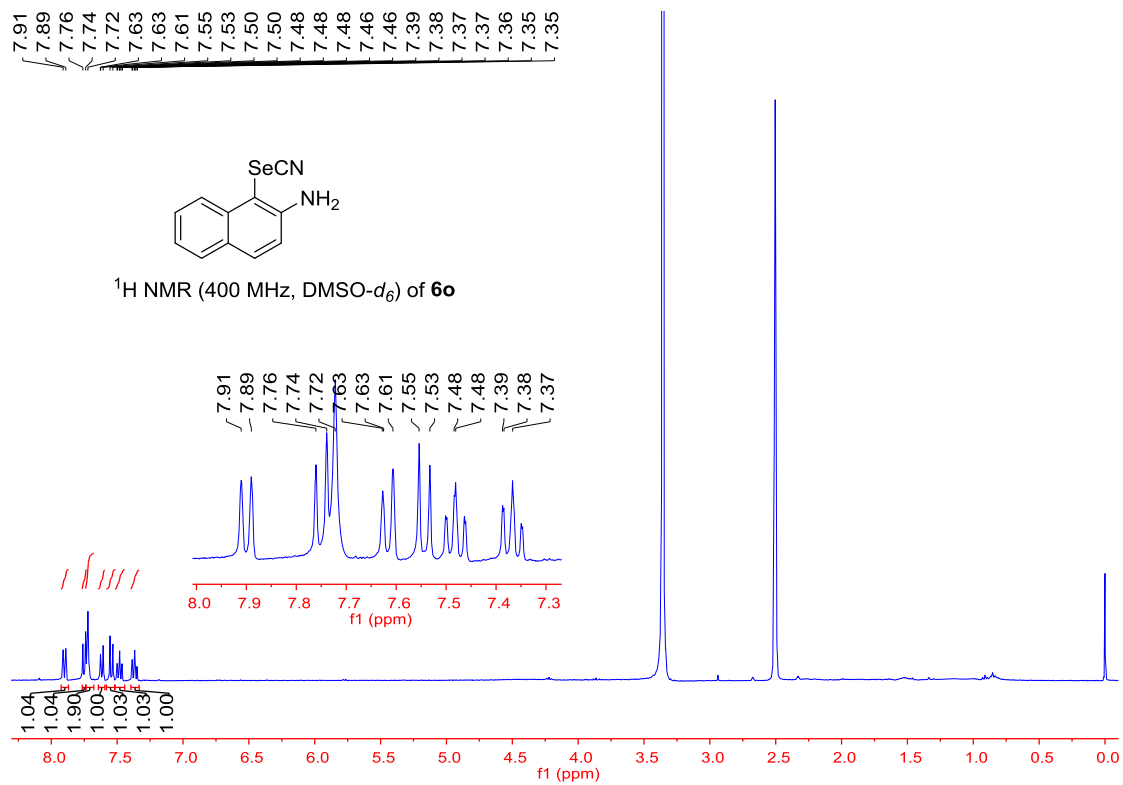

6.37

3.86  
3.84

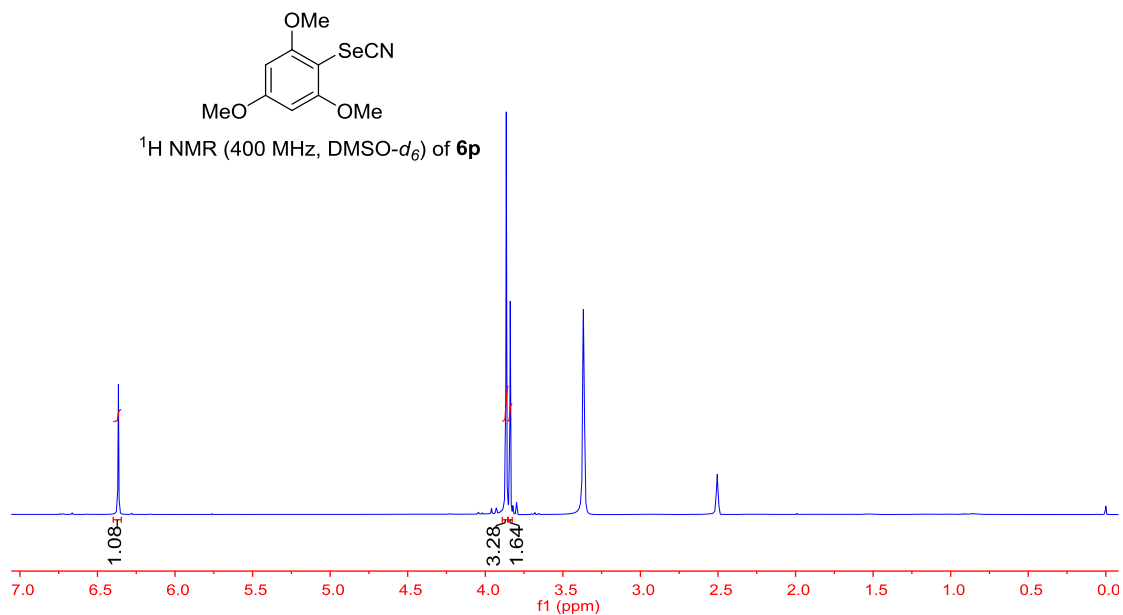



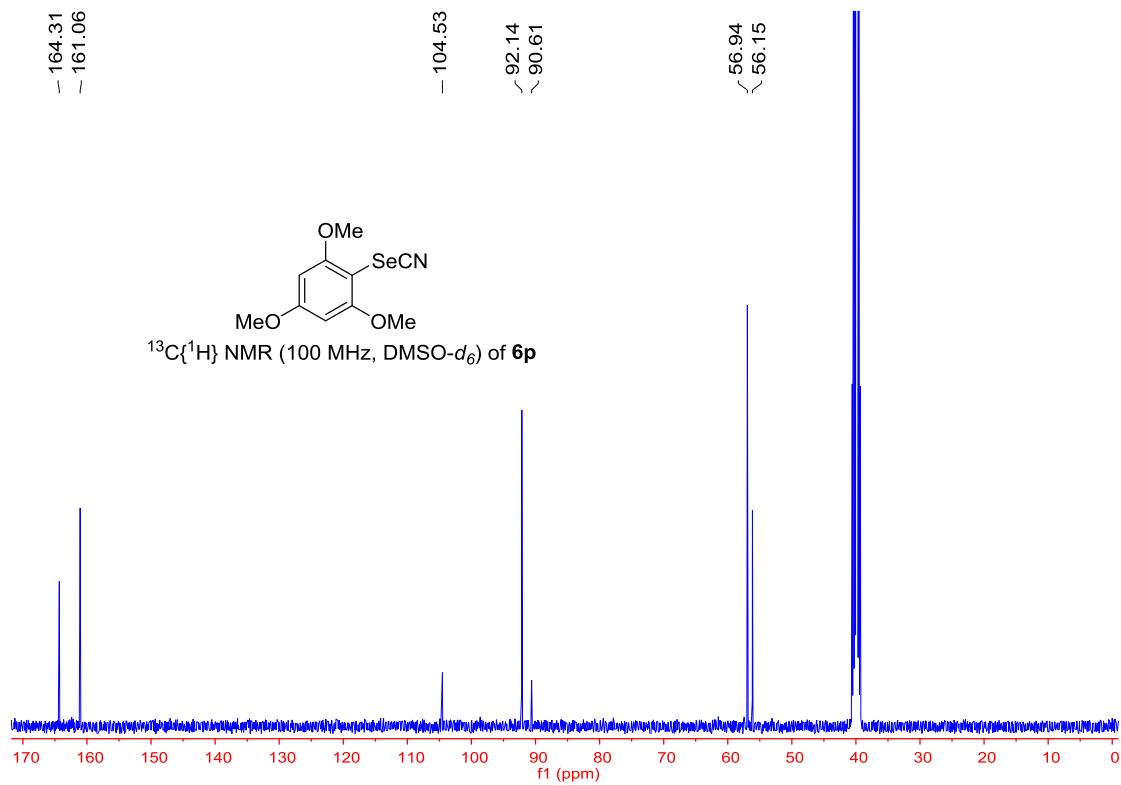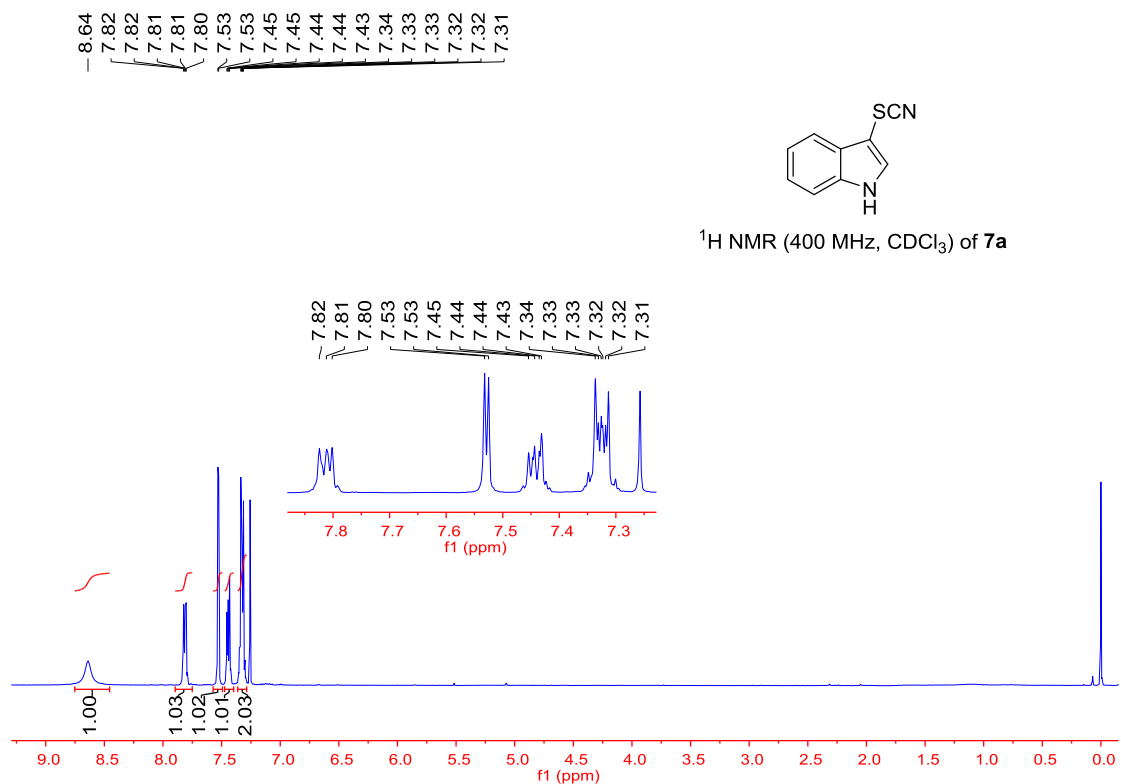

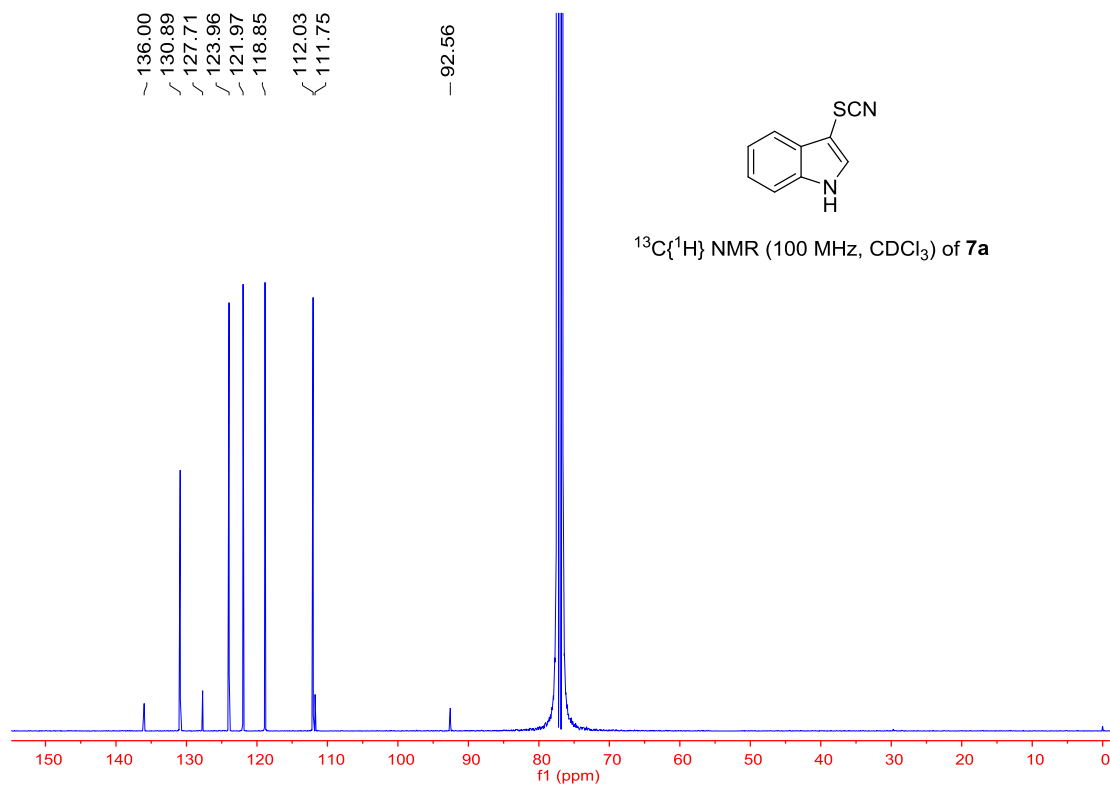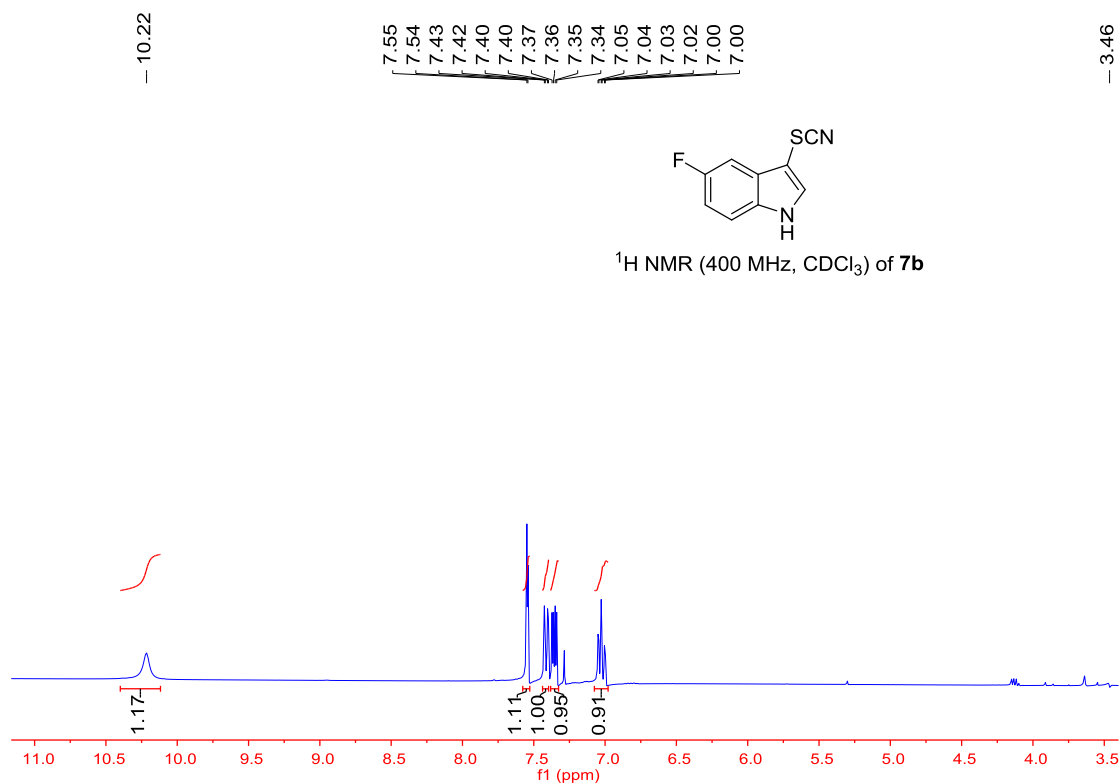

160.07  
157.71

133.19  
132.81  
128.59  
128.48  
113.37  
113.27  
112.30  
112.04  
103.81  
103.56

91.18  
91.14

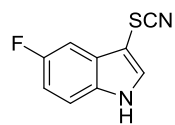

$^{13}\text{C}\{^1\text{H}\}$  NMR (100 MHz,  $\text{CDCl}_3$ ) of **7b**

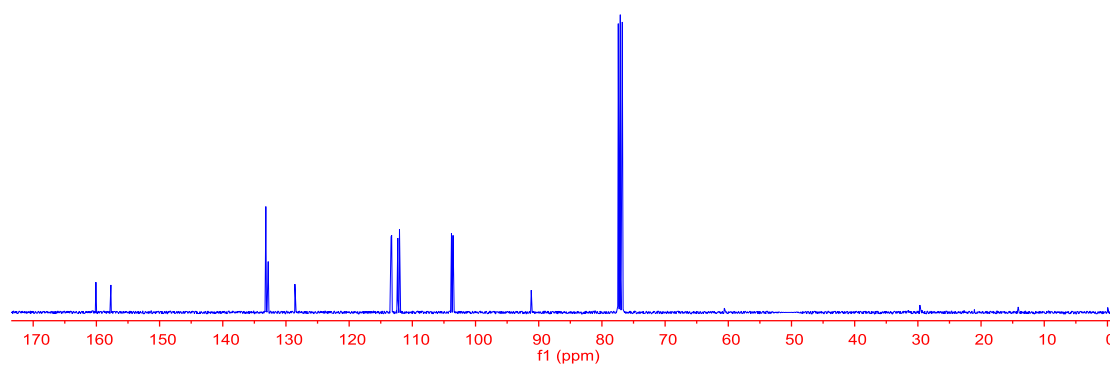

-121.41

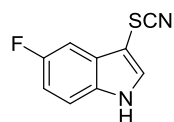

$^{19}\text{F}$  NMR (100 MHz,  $\text{CDCl}_3$ ) of **7b**

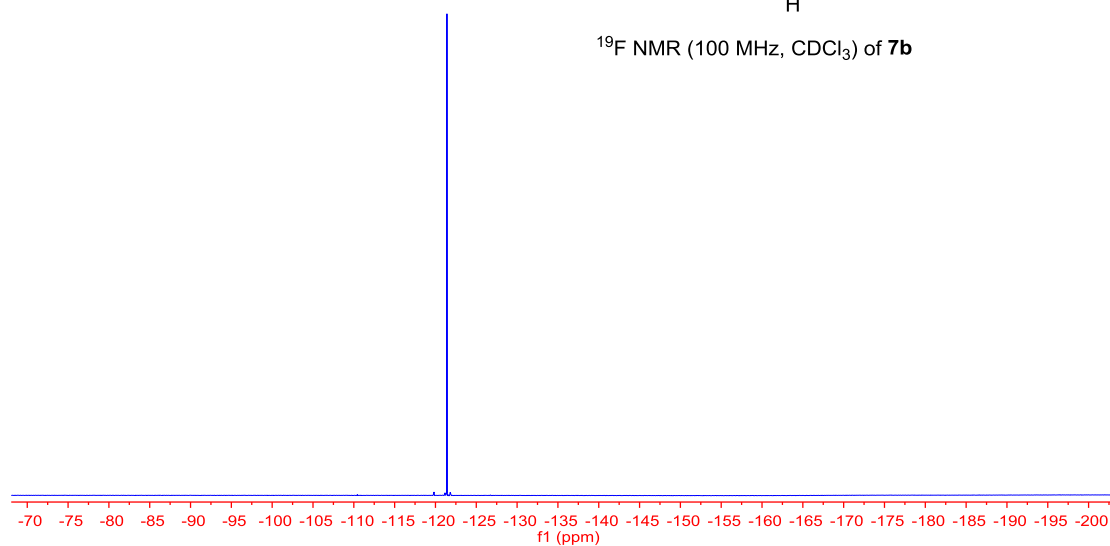

- 10.49

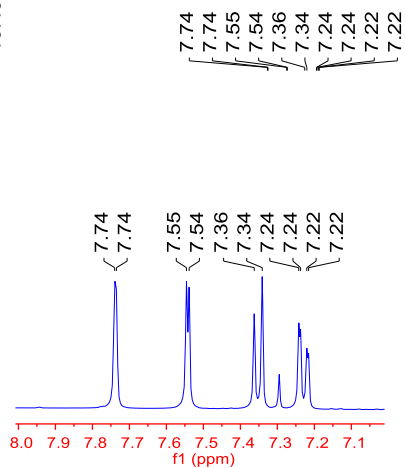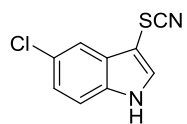

$^1\text{H}$  NMR (400 MHz,  $\text{CDCl}_3$ ) of **7c**

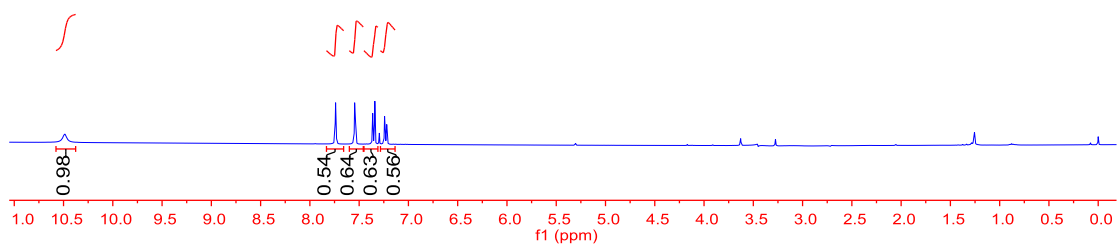

134.81  
132.97  
128.93  
127.47  
123.92  
118.03  
113.46  
111.92

- 90.80

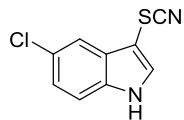

$^{13}\text{C}\{^1\text{H}\}$  NMR (100 MHz,  $\text{CDCl}_3$ ) of **7c**

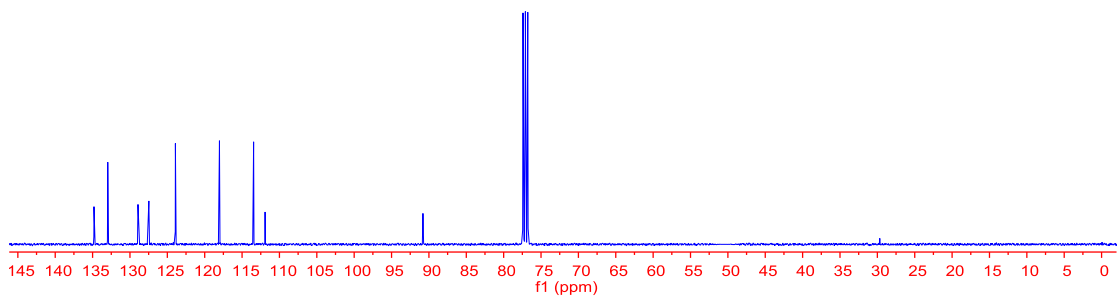

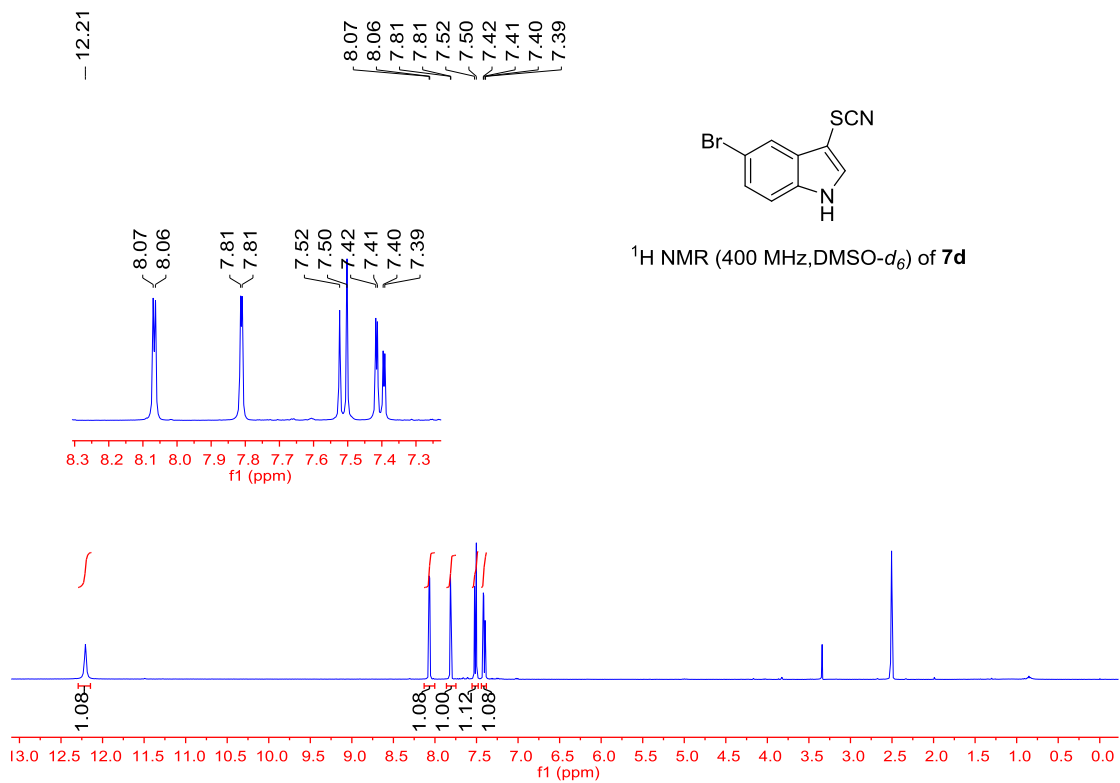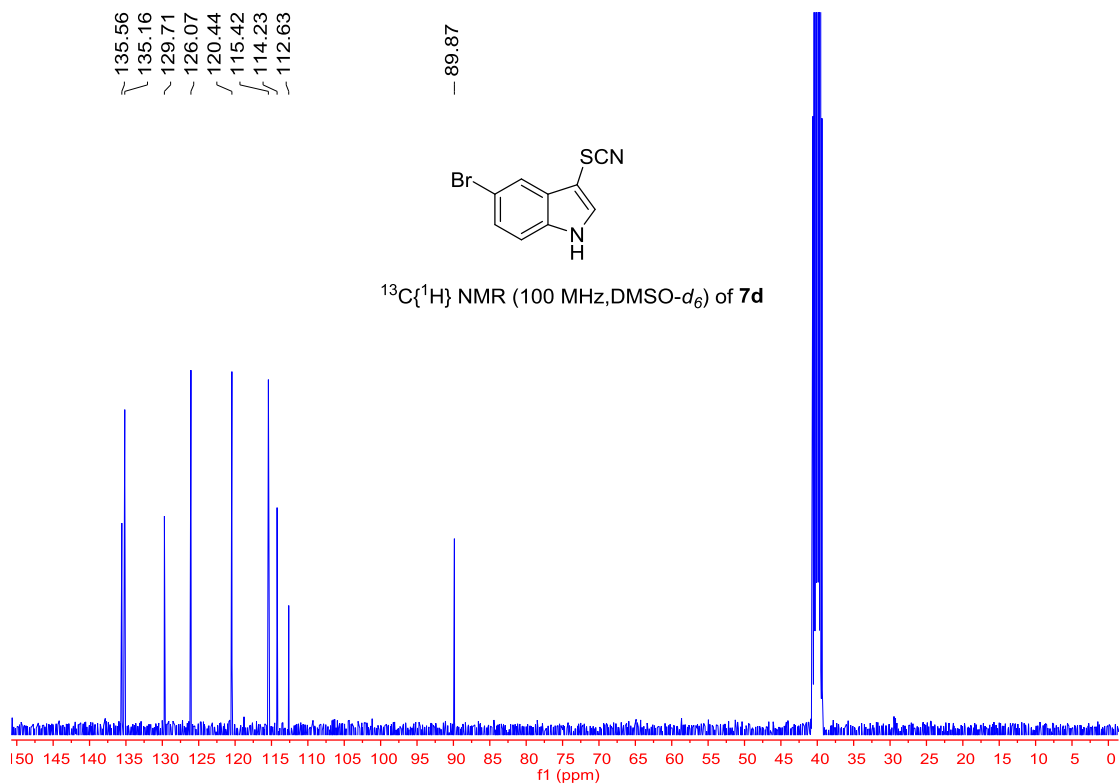

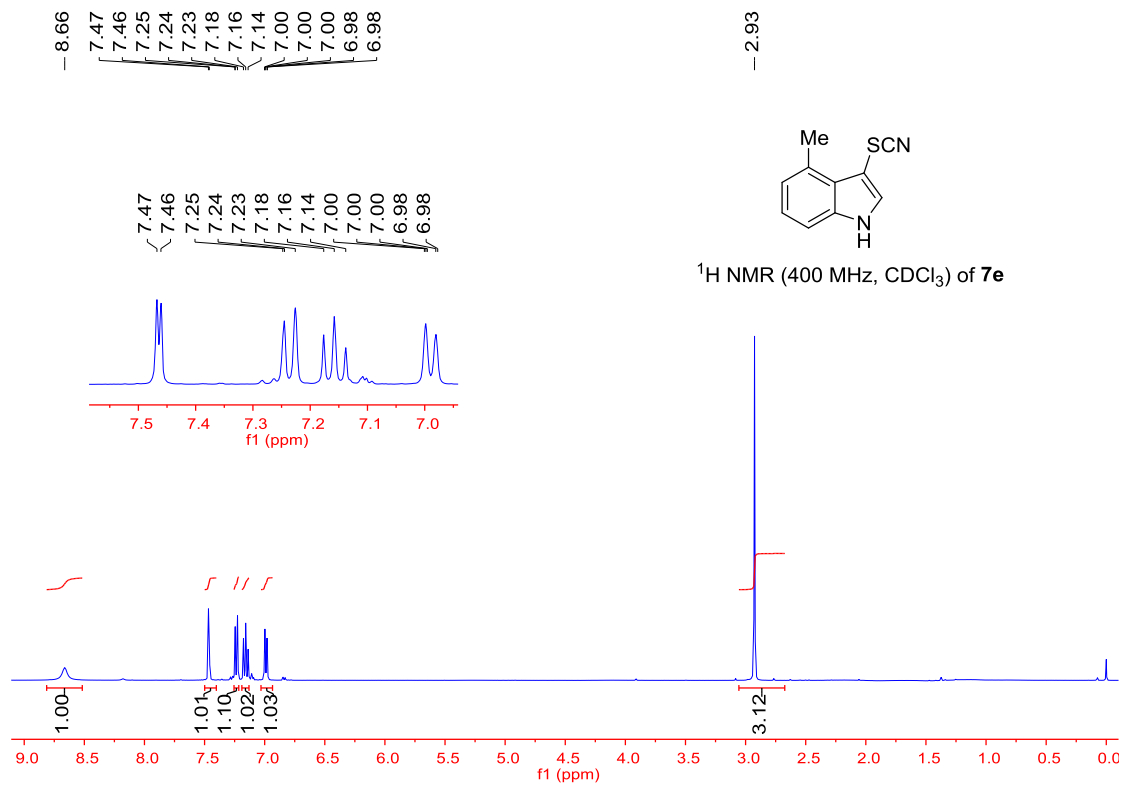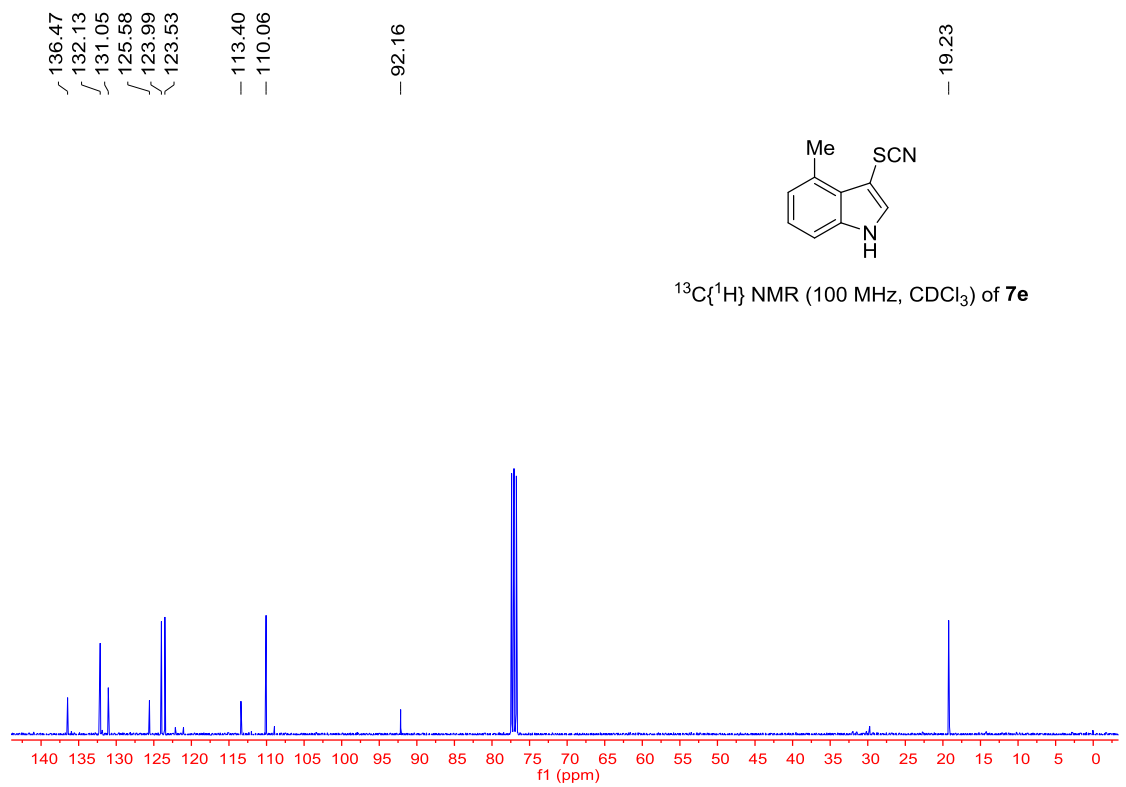

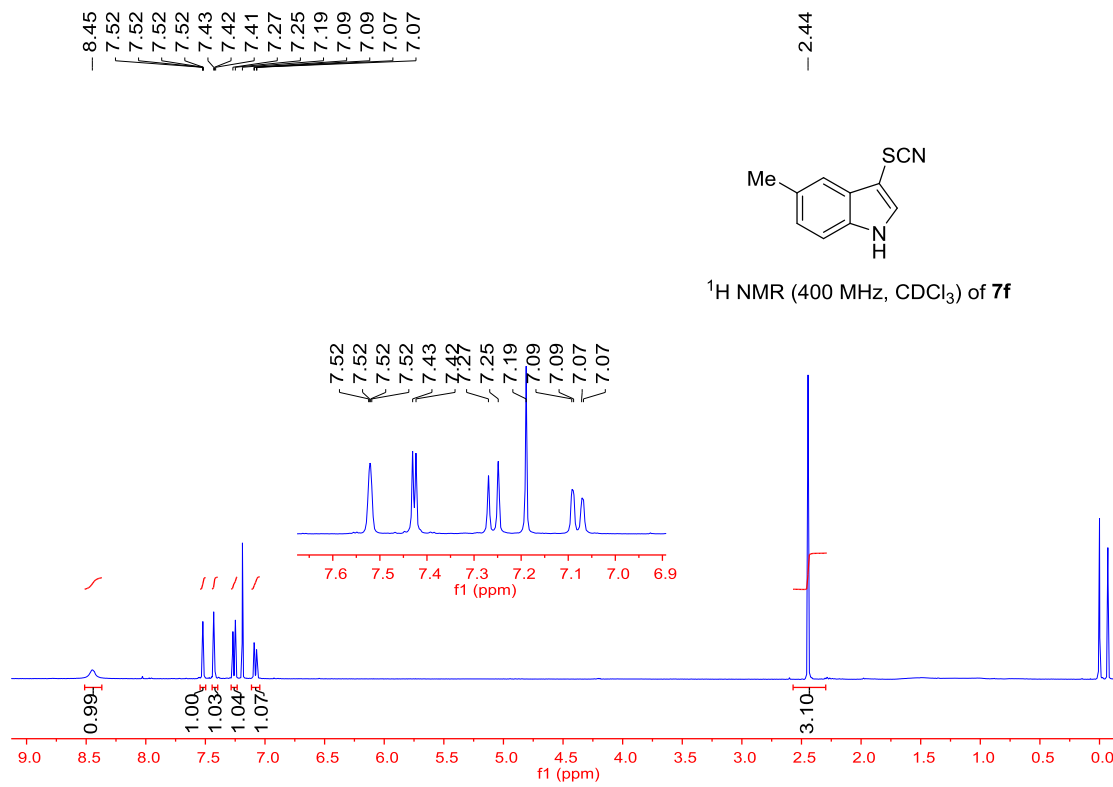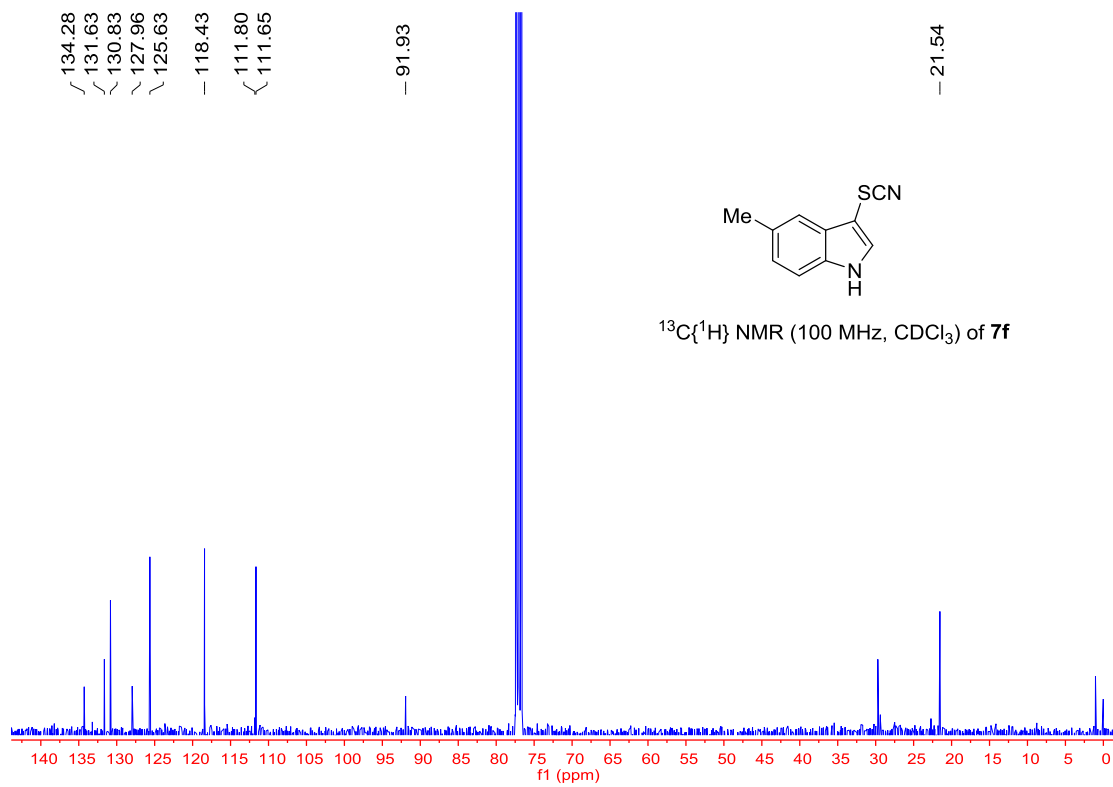

9.07  
7.81  
7.79  
7.64  
7.58  
7.57  
7.47  
7.46  
7.45  
7.44  
7.43

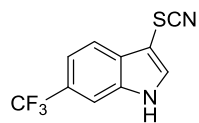

$^1\text{H}$  NMR (400 MHz,  $\text{CDCl}_3$ ) of **7g**

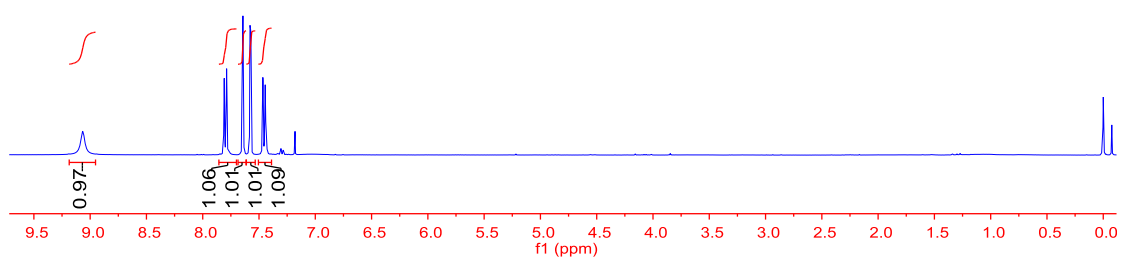

133.99  
132.45  
128.92  
125.32  
125.00  
124.92  
122.22  
118.30  
117.61  
116.58  
116.55  
108.91  
108.86  
108.82  
108.78  
- 91.91

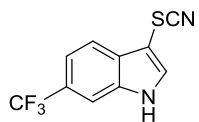

$^{13}\text{C}\{^1\text{H}\}$  NMR (100 MHz,  $\text{CDCl}_3$ ) of **7g**

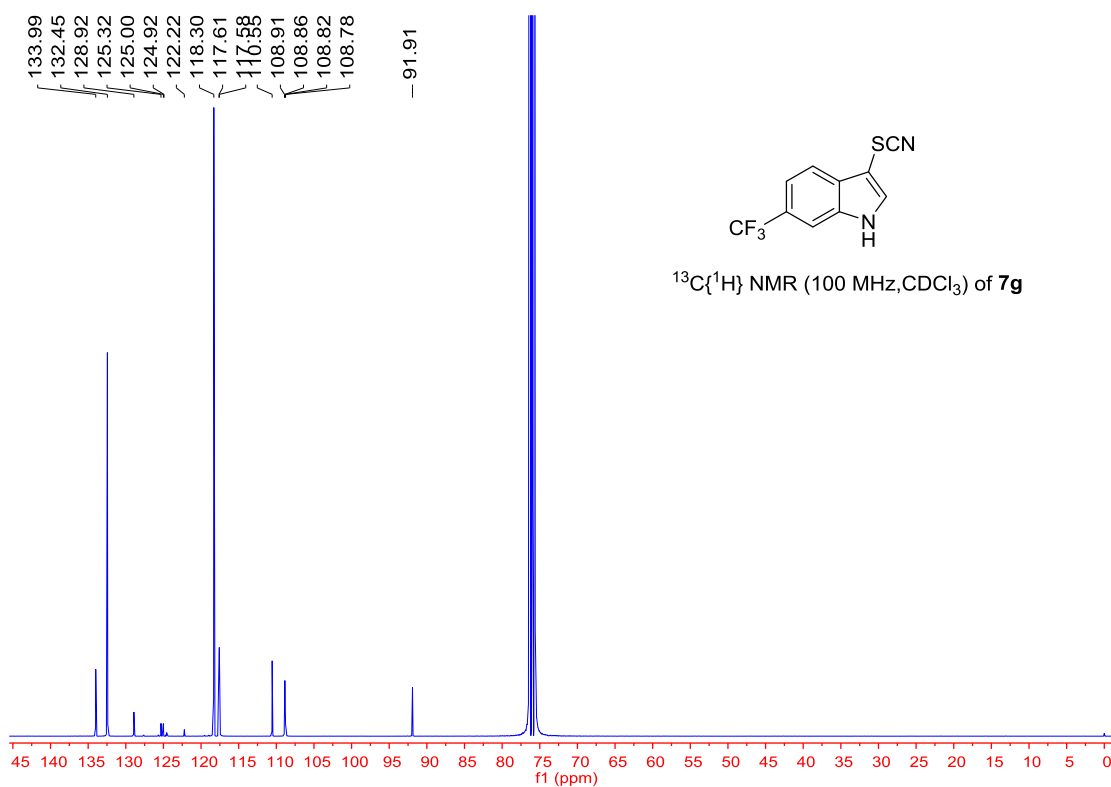



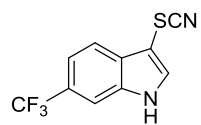

<sup>19</sup>F NMR (376 MHz, CDCl<sub>3</sub>) of **7g**

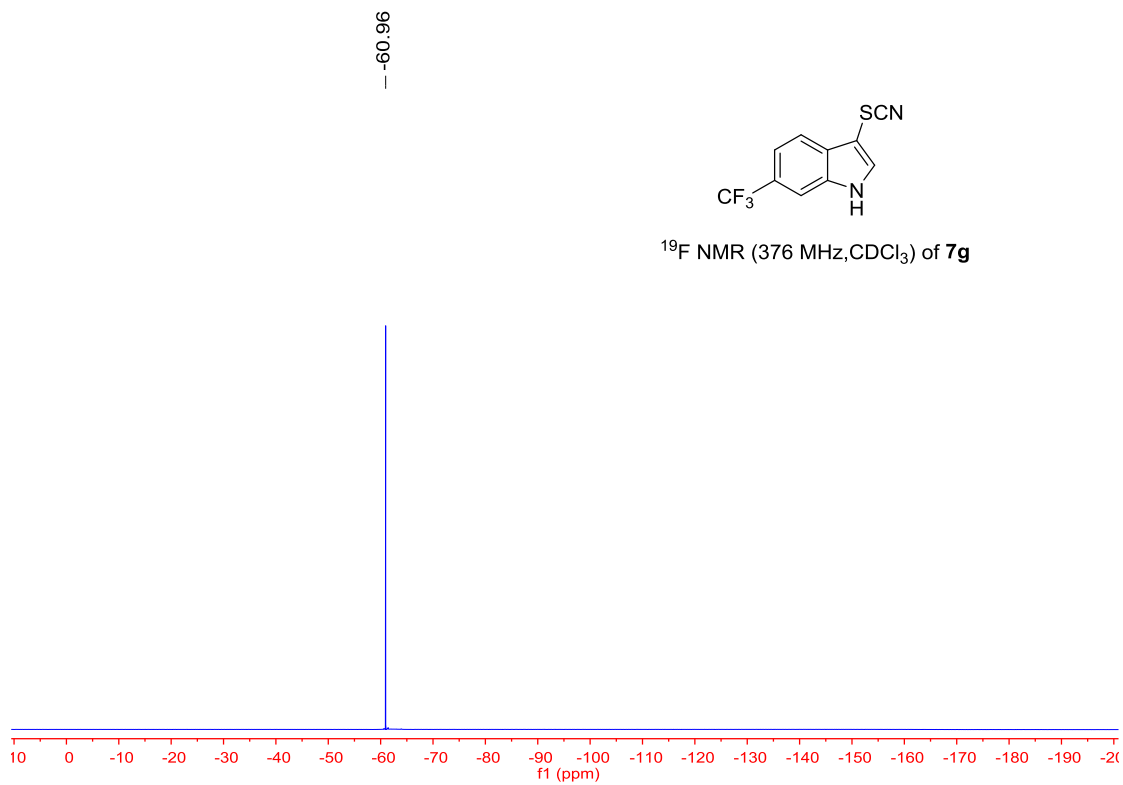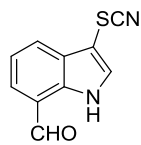

<sup>1</sup>H NMR (400 MHz, DMSO-*d*<sub>6</sub>) of **7h**

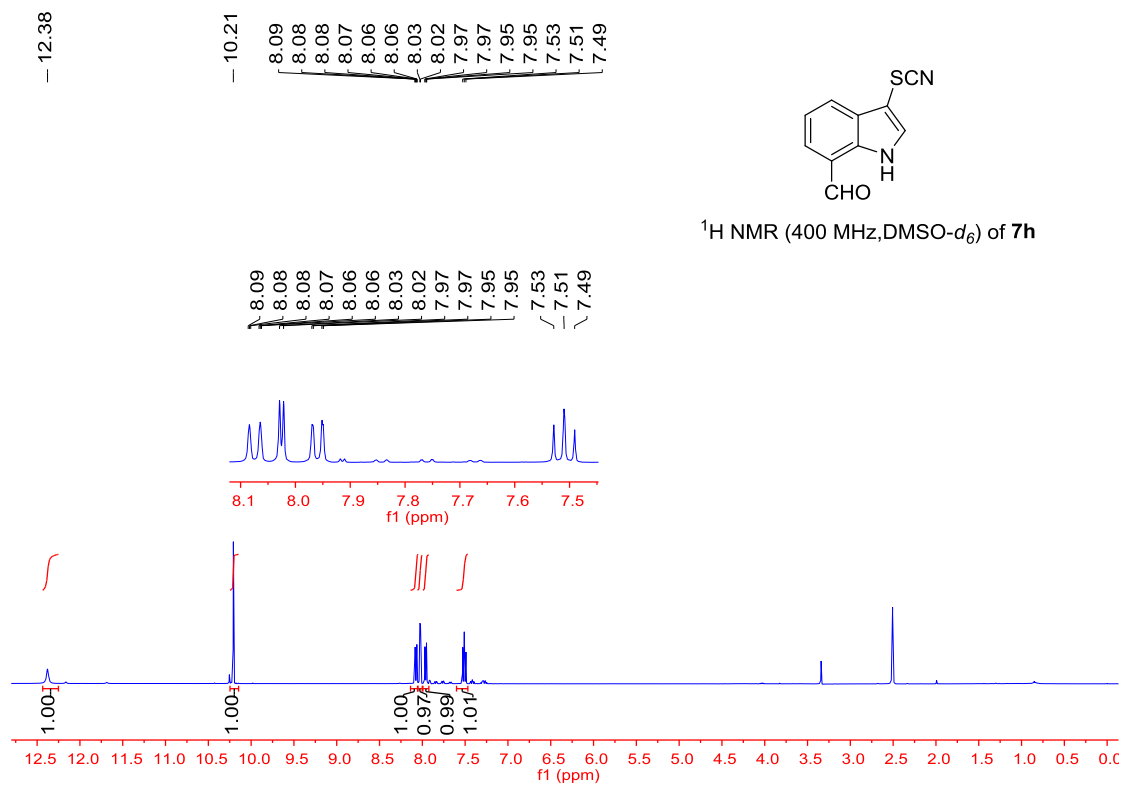

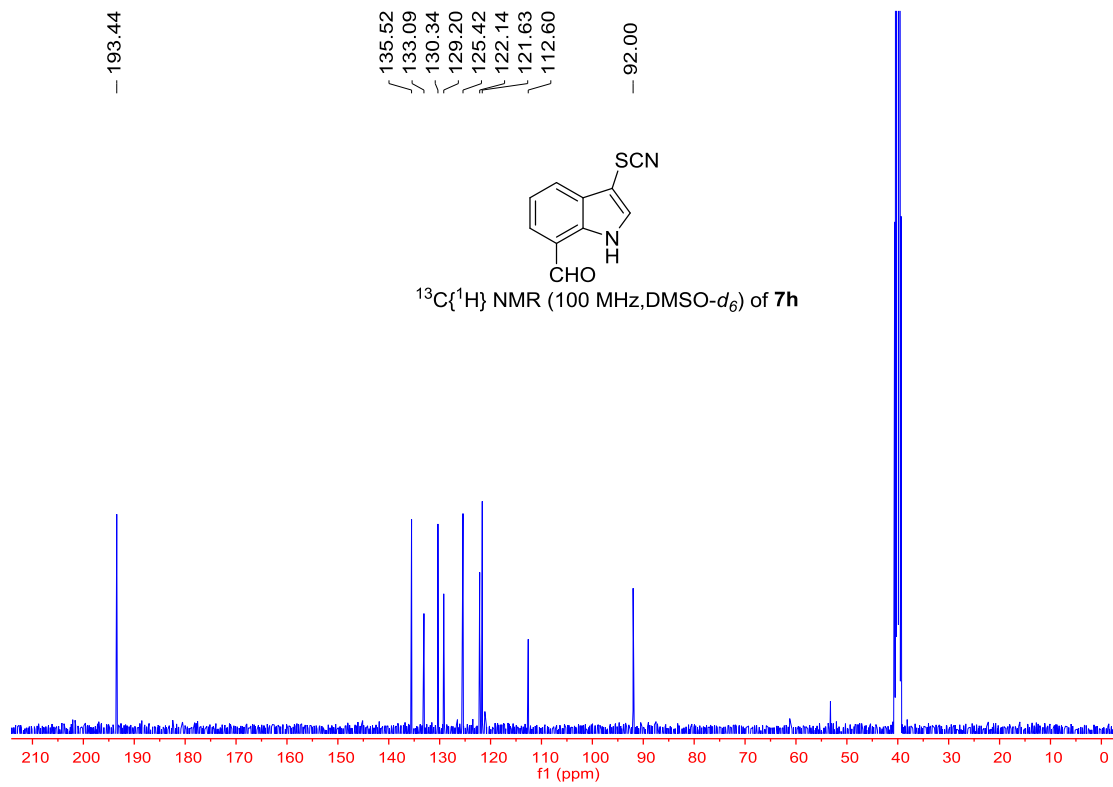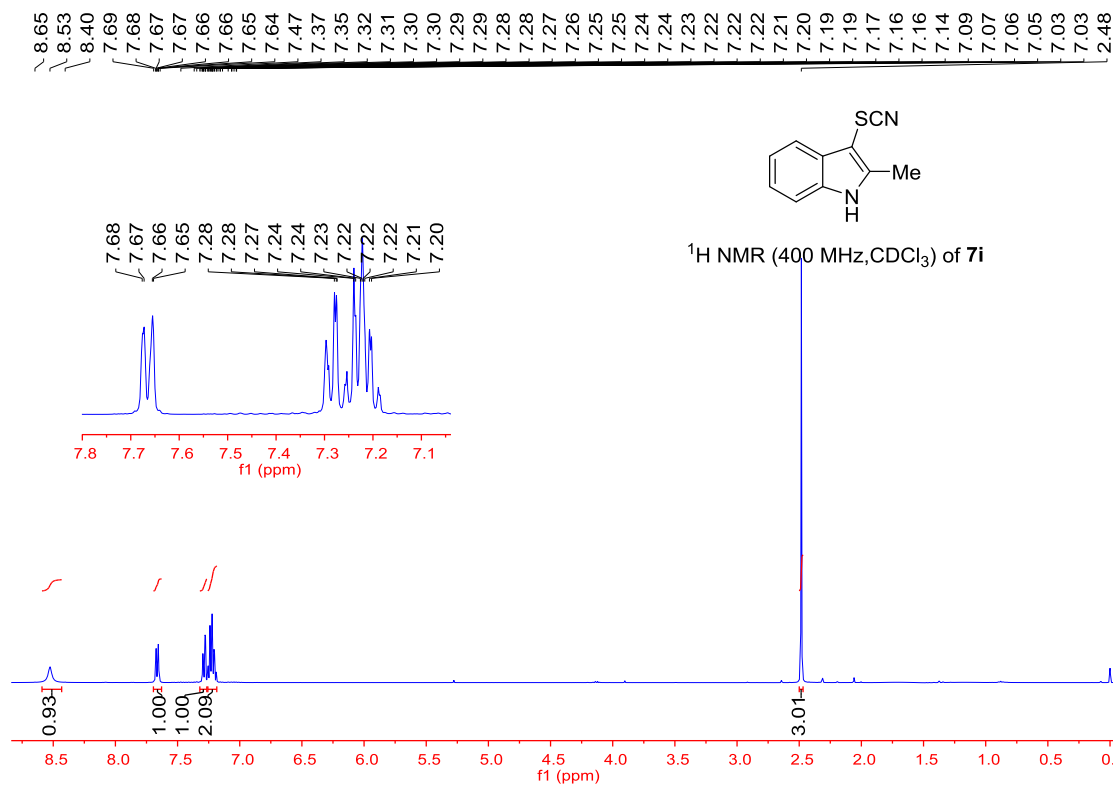

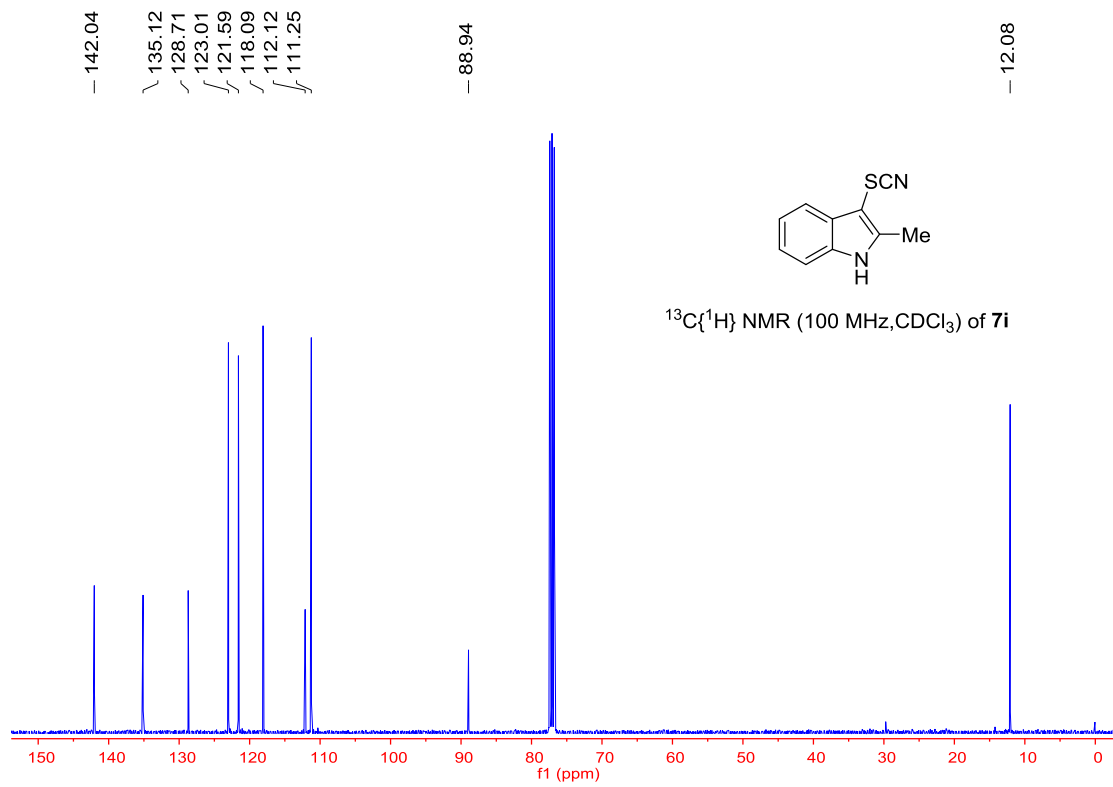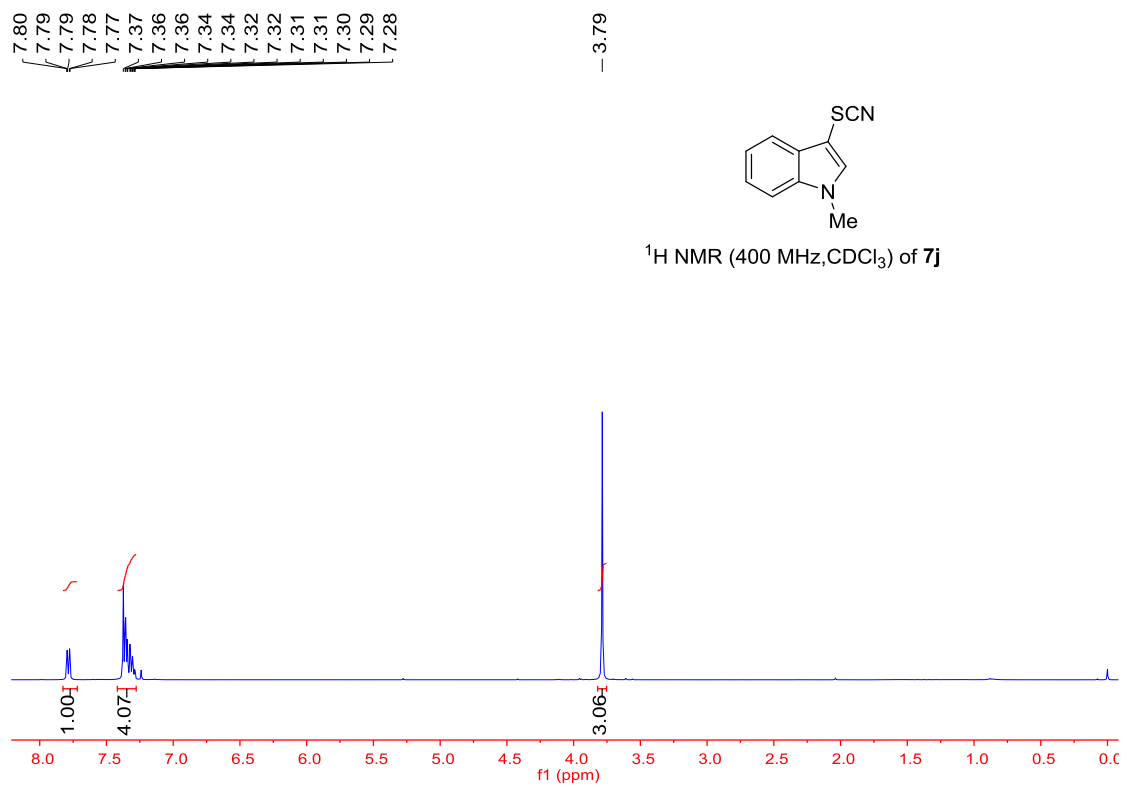

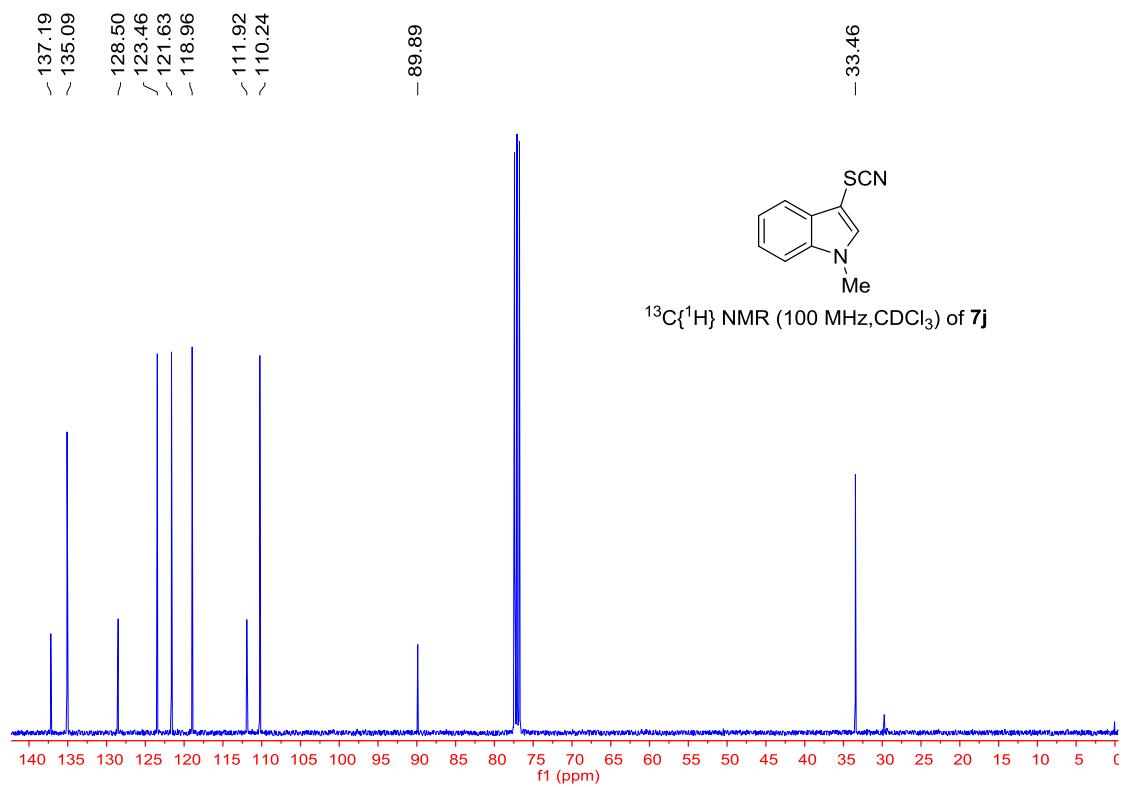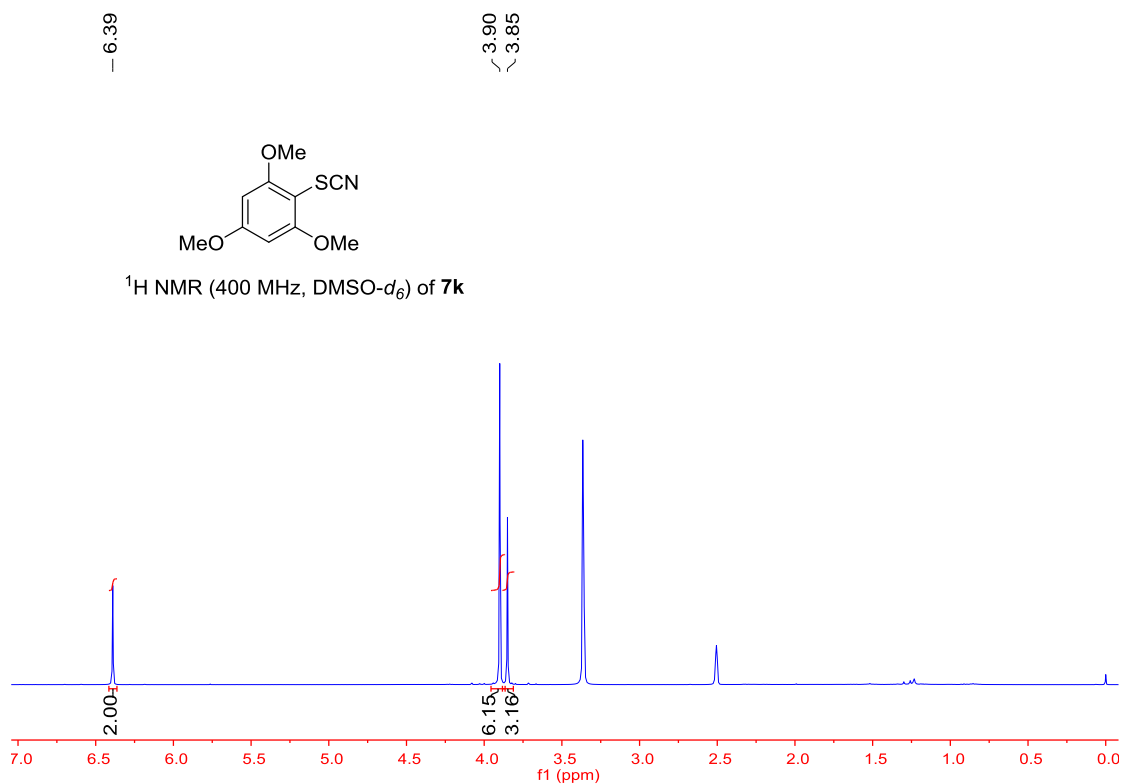

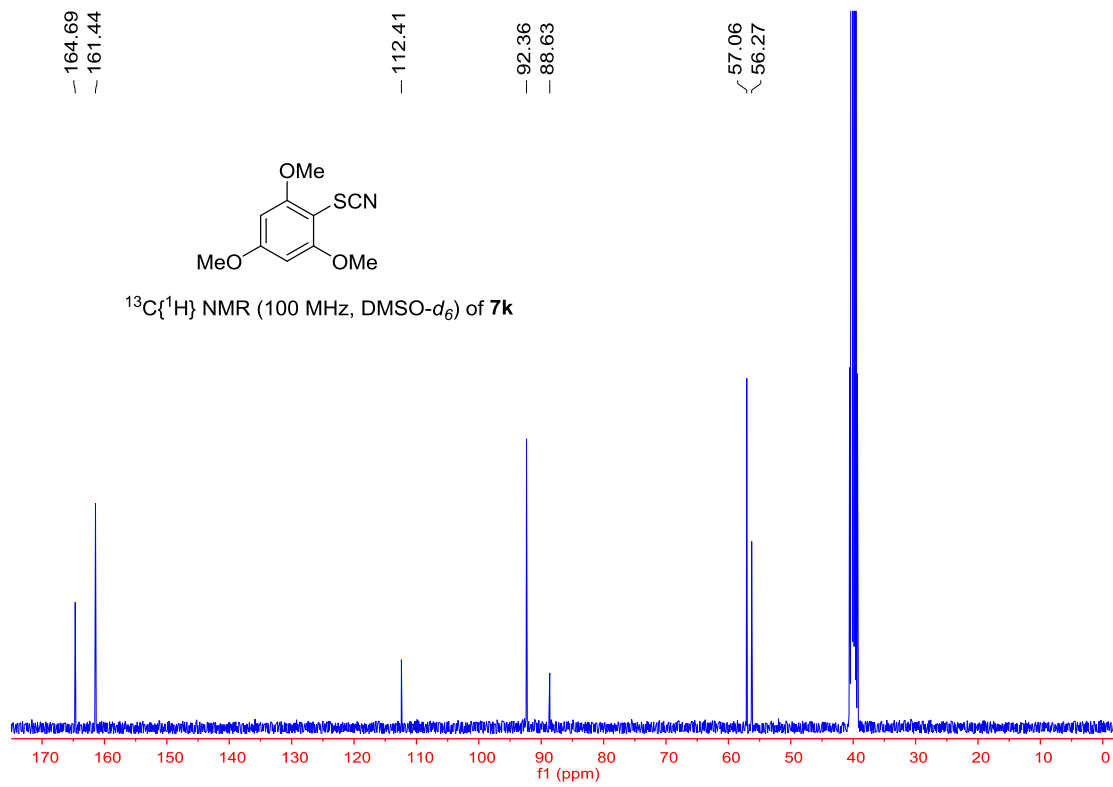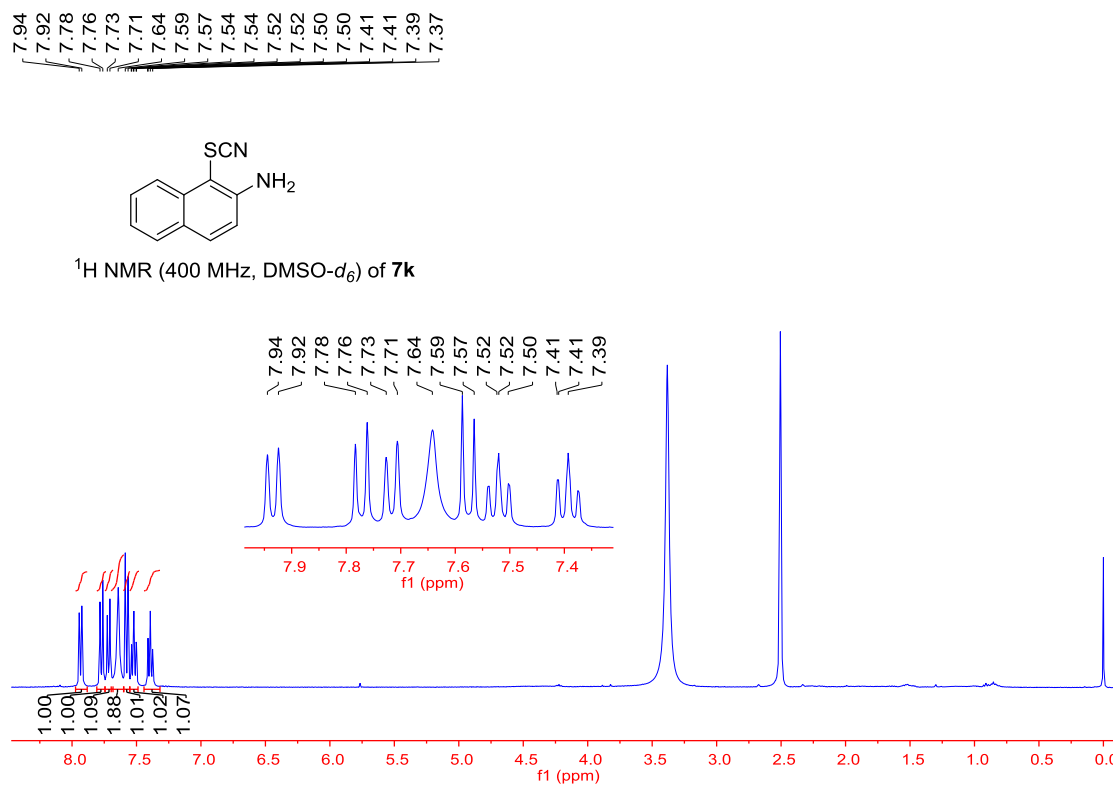

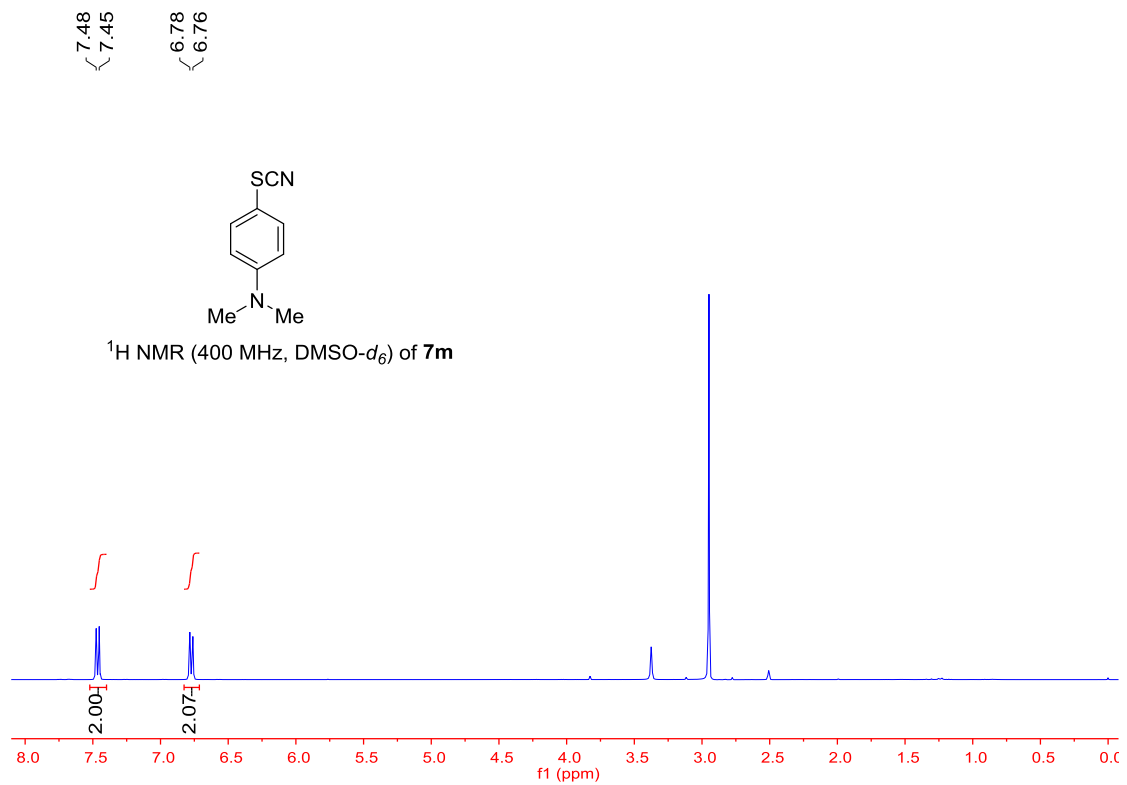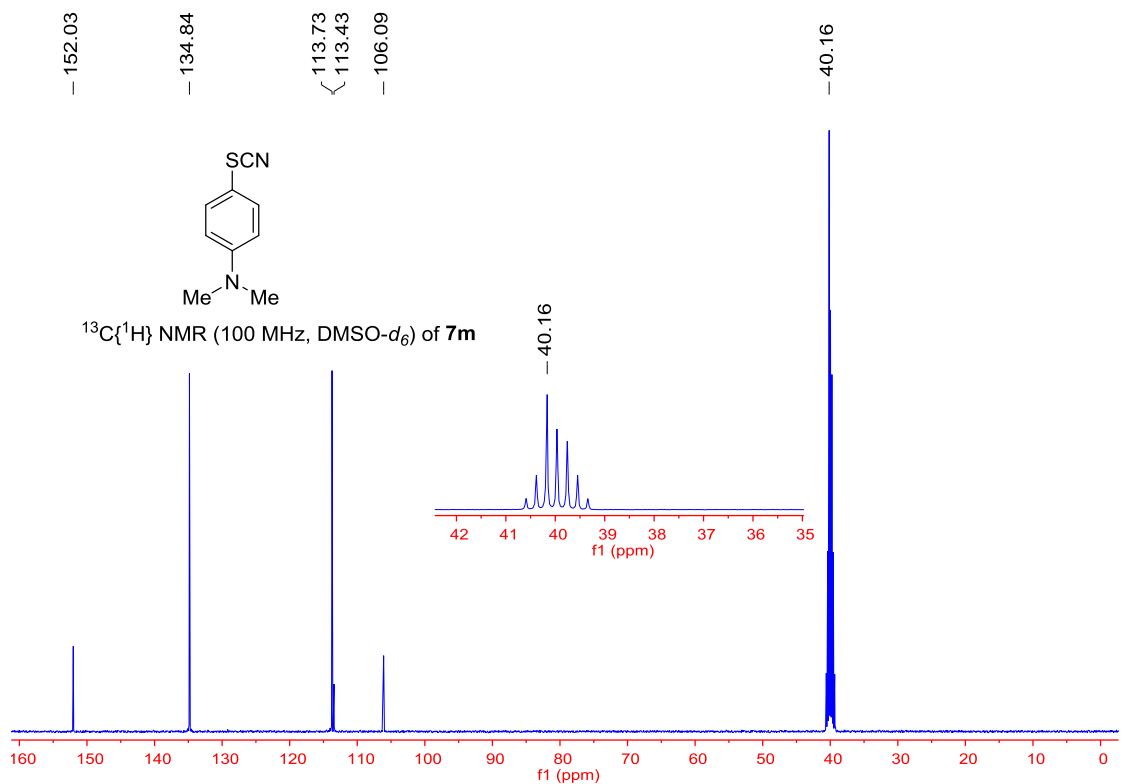

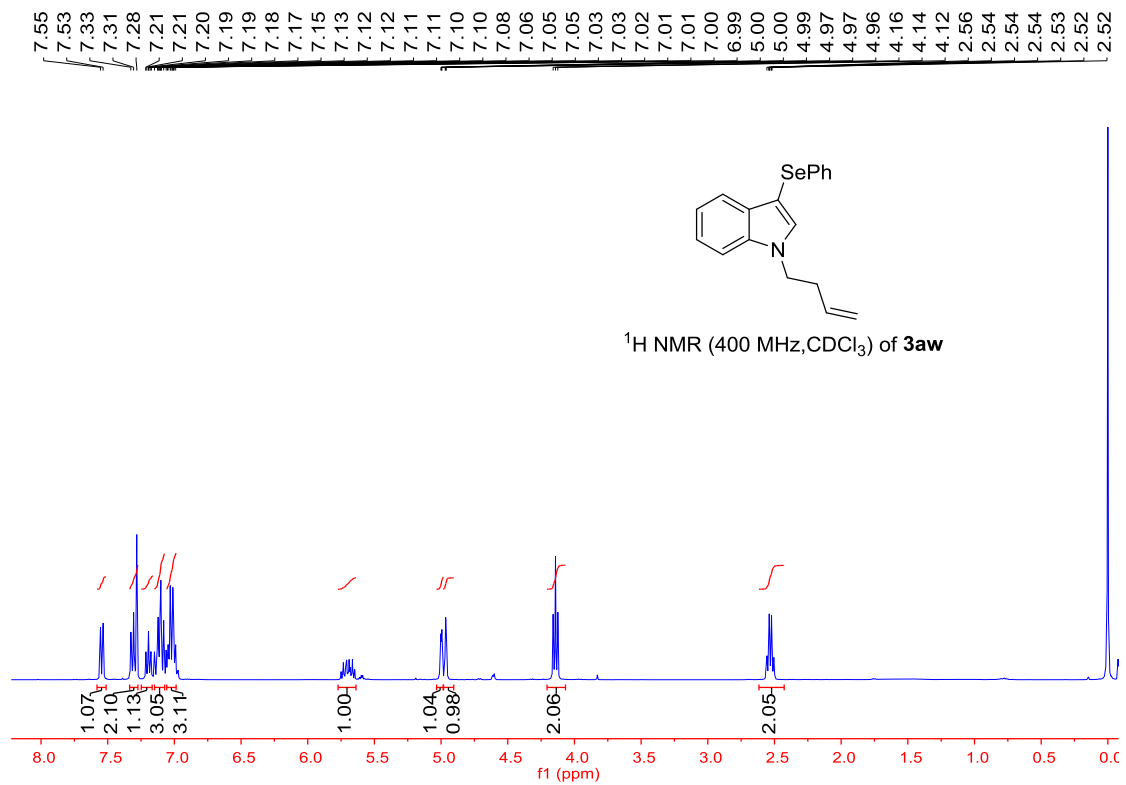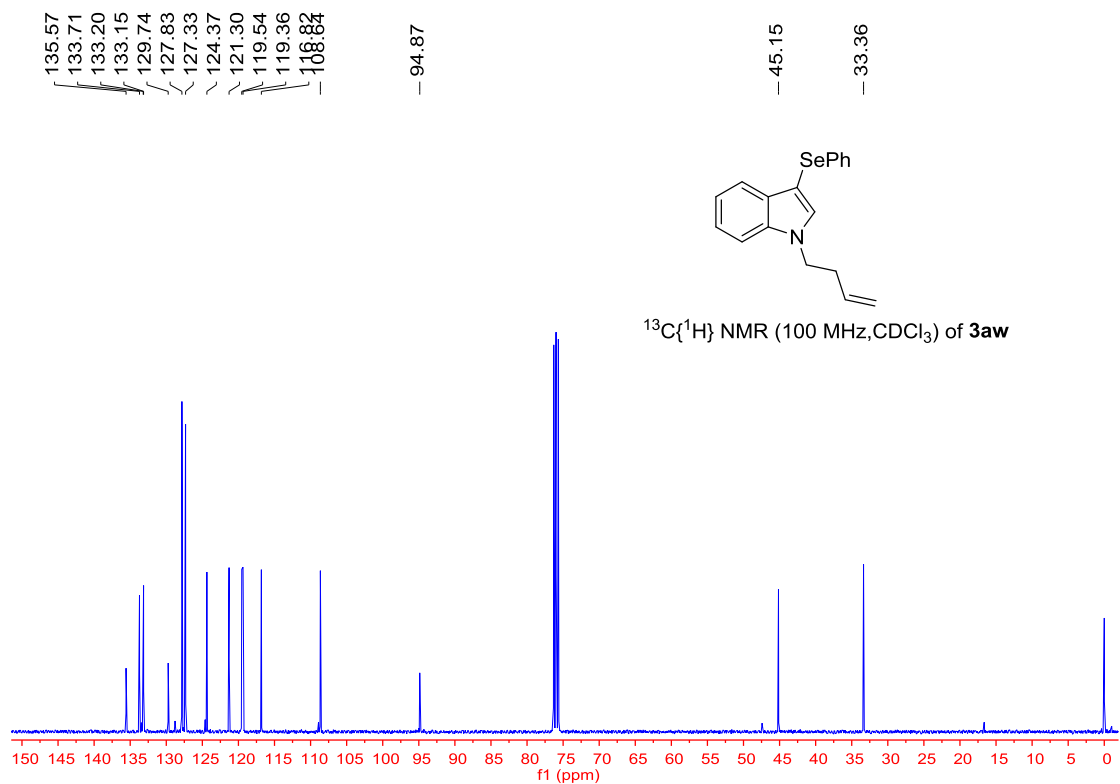

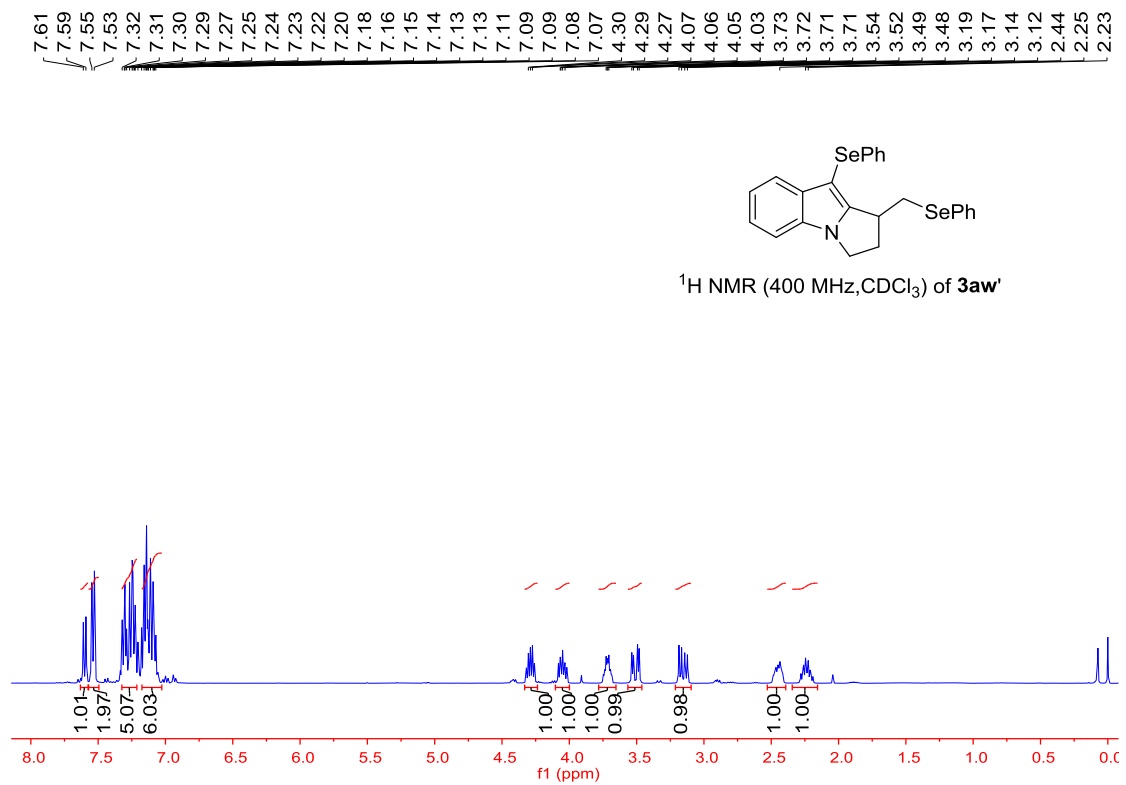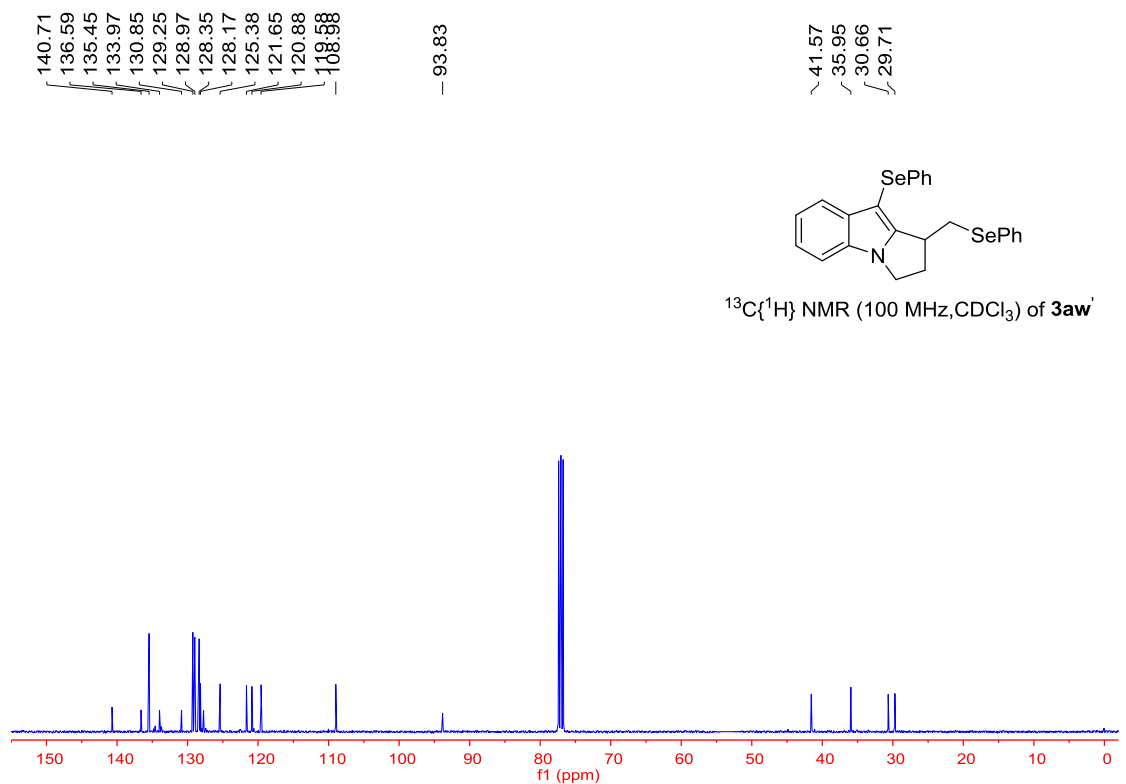

Supplement: d2ob00892k1.pdf [file d2ob00892k1.pdf]
